# Supplementary material for: Gene regulatory network plasticity predates a switch in function of a conserved transcription regulator
Source: eLife. 2017 Mar 22;6:e23250. doi: 10.7554/eLife.23250 (PMC5391208; doi:10.7554/eLife.23250)
Supplement: Supplementary file 1. — Rows correspond to groups of orthologous genes. Columns show results of all genomic experiments discussed here, colors correspond to experiments in different species. Cell value of ‘N/A’ indicates no orthologous gene for that orthogroup in that species. DOI: http://dx.doi.org/10.7554/eLife.23250.020 [file elife-23250-supp1.xlsx]

## Sheet: All genes
						S. cerevisiae OE ChIP	S. cerevisiae Endog SPO ChIP	S. cerevisiae PpNdt80 ChIP		K. lactis OE ChIP	P. pastoris OE ChIP	P. stipitis A/B OE ChIP	P. stipitis Ndt80A OE ChIP	P. stipitis Ndt80B OE ChIP	C. albicans A/B OE ChIP	C. albicans Ndt80A OE ChIP	C. albicans Ndt80B OE ChIP	C. albicans Ndt80B Endog ChIP	S. cerevisiae mRNA		K. lactis mRNA		P. pastoris mRNA				C. albicans mRNA	S. cerevisiae Motif Information		K. lactis Motif Information		P. pastoris Motif Information	P. stipitis Motif Information	C. albicans Motif Information
S.cerevisiae gene name	K. lactis gene name	P. pastoris gene name	P. stipitis gene name	C. albicans gene name	Orthogroup number	MACS Peak Both Reps	MACS Peak Both Reps	Mean of Max FE	MACS Peak Both Reps	MACS Peak Both Reps	MACS Peaks Both Reps	MACS Peaks Ndt80A or B	MACS Peaks Both Reps	MACS Peaks Both Reps	MACS Peaks Ndt80A or B	MACS Peaks Both Reps	MACS Peaks Both Reps	MACS Peaks Both Reps	Expr SPO vs YPD	Expr Ndt80 del vs WT	Expr SPO vs YPD	Expr Ndt80 del vs WT	Expr SPO vs YPD	SPO vs YPD signif?	Expr Ndt80 del vs WT	Ndt80 del signif?	Expr Ndt80 del vs WT	Conserved Motif (Smik Skud)	Ndt80 Consensus Motif	Conserved Motif (Egos Ecym)	Ndt80 Consensus Motif	Ndt80 Consensus Motif	Ndt80 Consensus Motif	Conserved Motif (Ctro Cdub)	Ndt80 Consensus Motif
N/A	N/A	PPAS0A00100	N/A	N/A	1	N/A	N/A	N/A	N/A	N/A	N	N	N/A	N/A	N	N/A	N/A	N/A	N/A	N/A	N/A	N/A	N/A	N/A	N/A	N/A	N/A	N/A	N/A	N/A	N/A	Y	N/A	N/A	N/A
N/A	N/A	PPAS0A00110	N/A	N/A	2	N/A	N/A	N/A	N/A	N/A	Y	N	N/A	N/A	N	N/A	N/A	N/A	N/A	N/A	N/A	N/A	2.47956	yes	0.297026	no	N/A	N/A	N/A	N/A	N/A	Y	N/A	N/A	N/A
N/A	N/A	PPAS0A00120	N/A	N/A	3	N/A	N/A	N/A	N/A	N/A	Y	N	N/A	N/A	N	N/A	N/A	N/A	N/A	N/A	N/A	N/A	0.755366	no	-0.301034	no	N/A	N/A	N/A	N/A	N/A	Y	N/A	N/A	N/A
N/A	N/A	PPAS0A00130	N/A	N/A	4	N/A	N/A	N/A	N/A	N/A	N	N	N/A	N/A	N	N/A	N/A	N/A	N/A	N/A	N/A	N/A	2.41867	yes	-0.160335	no	N/A	N/A	N/A	N/A	N/A	N	N/A	N/A	N/A
N/A	N/A	PPAS0A00150	N/A	N/A	5	N/A	N/A	N/A	N/A	N/A	N	N	N/A	N/A	N	N/A	N/A	N/A	N/A	N/A	N/A	N/A	2.01385	yes	-0.322924	no	N/A	N/A	N/A	N/A	N/A	Y	N/A	N/A	N/A
N/A	N/A	PPAS0A00160	N/A	N/A	6	N/A	N/A	N/A	N/A	N/A	Y	N	N/A	N/A	N	N/A	N/A	N/A	N/A	N/A	N/A	N/A	-2.42458	yes	0.14405	no	N/A	N/A	N/A	N/A	N/A	N	N/A	N/A	N/A
N/A	N/A	PPAS0A00170	N/A	N/A	7	N/A	N/A	N/A	N/A	N/A	N	N	N/A	N/A	N	N/A	N/A	N/A	N/A	N/A	N/A	N/A	0.524596	no	0.255887	no	N/A	N/A	N/A	N/A	N/A	N	N/A	N/A	N/A
N/A	N/A	PPAS0A00180	N/A	N/A	8	N/A	N/A	N/A	N/A	N/A	N	N	N/A	N/A	N	N/A	N/A	N/A	N/A	N/A	N/A	N/A	1.35964	no	0.283459	no	N/A	N/A	N/A	N/A	N/A	N	N/A	N/A	N/A
N/A	N/A	PPAS0A00190	N/A	N/A	9	N/A	N/A	N/A	N/A	N/A	Y	N	N/A	N/A	N	N/A	N/A	N/A	N/A	N/A	N/A	N/A	1.20199	yes	0.0741941	no	N/A	N/A	N/A	N/A	N/A	Y	N/A	N/A	N/A
N/A	N/A	PPAS0A00200	N/A	N/A	10	N/A	N/A	N/A	N/A	N/A	N	N	N/A	N/A	N	N/A	N/A	N/A	N/A	N/A	N/A	N/A	0.593189	no	0.533344	no	N/A	N/A	N/A	N/A	N/A	Y	N/A	N/A	N/A
N/A	N/A	PPAS0A00260	N/A	N/A	11	N/A	N/A	N/A	N/A	N/A	Y	N	N/A	N/A	N	N/A	N/A	N/A	N/A	N/A	N/A	N/A	-1.92668	yes	0.210814	no	N/A	N/A	N/A	N/A	N/A	Y	N/A	N/A	N/A
N/A	N/A	PPAS0A00340	N/A	N/A	12	N/A	N/A	N/A	N/A	N/A	Y	N	N/A	N/A	N	N/A	N/A	N/A	N/A	N/A	N/A	N/A	N/A	N/A	N/A	N/A	N/A	N/A	N/A	N/A	N/A	N	N/A	N/A	N/A
N/A	N/A	PPAS0A00380	N/A	N/A	13	N/A	N/A	N/A	N/A	N/A	N	N	N/A	N/A	N	N/A	N/A	N/A	N/A	N/A	N/A	N/A	0.157462	no	-0.0368551	no	N/A	N/A	N/A	N/A	N/A	N	N/A	N/A	N/A
N/A	N/A	PPAS0A00420	N/A	N/A	14	N/A	N/A	N/A	N/A	N/A	N	N	N/A	N/A	N	N/A	N/A	N/A	N/A	N/A	N/A	N/A	0.181321	no	-0.171663	no	N/A	N/A	N/A	N/A	N/A	N	N/A	N/A	N/A
N/A	N/A	PPAS0A00450	N/A	N/A	15	N/A	N/A	N/A	N/A	N/A	Y	N	N/A	N/A	N	N/A	N/A	N/A	N/A	N/A	N/A	N/A	0.560355	no	-0.550073	no	N/A	N/A	N/A	N/A	N/A	N	N/A	N/A	N/A
N/A	N/A	PPAS0A00490	N/A	N/A	16	N/A	N/A	N/A	N/A	N/A	N	N	N/A	N/A	N	N/A	N/A	N/A	N/A	N/A	N/A	N/A	-1.47228	yes	0.482961	no	N/A	N/A	N/A	N/A	N/A	N	N/A	N/A	N/A
N/A	N/A	PPAS0A00540	N/A	N/A	17	N/A	N/A	N/A	N/A	N/A	N	N	N/A	N/A	N	N/A	N/A	N/A	N/A	N/A	N/A	N/A	N/A	N/A	N/A	N/A	N/A	N/A	N/A	N/A	N/A	N	N/A	N/A	N/A
N/A	N/A	PPAS0A00570	N/A	N/A	18	N/A	N/A	N/A	N/A	N/A	N	N	N/A	N/A	N	N/A	N/A	N/A	N/A	N/A	N/A	N/A	4.45203	yes	-0.212117	no	N/A	N/A	N/A	N/A	N/A	N	N/A	N/A	N/A
N/A	N/A	PPAS0A00580	N/A	N/A	19	N/A	N/A	N/A	N/A	N/A	Y	N	N/A	N/A	N	N/A	N/A	N/A	N/A	N/A	N/A	N/A	4.45203	yes	-0.212117	no	N/A	N/A	N/A	N/A	N/A	N	N/A	N/A	N/A
N/A	N/A	PPAS0A00730	N/A	N/A	20	N/A	N/A	N/A	N/A	N/A	N	N	N/A	N/A	N	N/A	N/A	N/A	N/A	N/A	N/A	N/A	-1.00681	no	0.467682	no	N/A	N/A	N/A	N/A	N/A	N	N/A	N/A	N/A
N/A	N/A	PPAS0A00870	N/A	N/A	21	N/A	N/A	N/A	N/A	N/A	N	N	N/A	N/A	N	N/A	N/A	N/A	N/A	N/A	N/A	N/A	0.0947408	no	0.367424	no	N/A	N/A	N/A	N/A	N/A	N	N/A	N/A	N/A
N/A	N/A	PPAS0A00890	N/A	N/A	22	N/A	N/A	N/A	N/A	N/A	N	N	N/A	N/A	N	N/A	N/A	N/A	N/A	N/A	N/A	N/A	0.367899	no	0.299763	no	N/A	N/A	N/A	N/A	N/A	N	N/A	N/A	N/A
N/A	N/A	PPAS0A00970	N/A	N/A	23	N/A	N/A	N/A	N/A	N/A	Y	N	N/A	N/A	N	N/A	N/A	N/A	N/A	N/A	N/A	N/A	-1.16959	yes	-0.0427108	no	N/A	N/A	N/A	N/A	N/A	N	N/A	N/A	N/A
N/A	N/A	PPAS0A00980	N/A	N/A	24	N/A	N/A	N/A	N/A	N/A	Y	N	N/A	N/A	N	N/A	N/A	N/A	N/A	N/A	N/A	N/A	N/A	N/A	N/A	N/A	N/A	N/A	N/A	N/A	N/A	N	N/A	N/A	N/A
N/A	N/A	PPAS0A01010	N/A	N/A	25	N/A	N/A	N/A	N/A	N/A	N	N	N/A	N/A	N	N/A	N/A	N/A	N/A	N/A	N/A	N/A	0.268255	no	0.256461	no	N/A	N/A	N/A	N/A	N/A	N	N/A	N/A	N/A
N/A	N/A	PPAS0A01020	N/A	N/A	26	N/A	N/A	N/A	N/A	N/A	N	N	N/A	N/A	N	N/A	N/A	N/A	N/A	N/A	N/A	N/A	0.208359	no	0.56038	no	N/A	N/A	N/A	N/A	N/A	N	N/A	N/A	N/A
N/A	N/A	PPAS0A01030	N/A	N/A	27	N/A	N/A	N/A	N/A	N/A	N	N	N/A	N/A	N	N/A	N/A	N/A	N/A	N/A	N/A	N/A	1.20176	yes	-0.0263676	no	N/A	N/A	N/A	N/A	N/A	N	N/A	N/A	N/A
N/A	N/A	PPAS0A01040	N/A	N/A	28	N/A	N/A	N/A	N/A	N/A	N	N	N/A	N/A	N	N/A	N/A	N/A	N/A	N/A	N/A	N/A	0.222665	no	-0.289978	no	N/A	N/A	N/A	N/A	N/A	N	N/A	N/A	N/A
N/A	N/A	PPAS0A01070	N/A	N/A	29	N/A	N/A	N/A	N/A	N/A	Y	N	N/A	N/A	N	N/A	N/A	N/A	N/A	N/A	N/A	N/A	-0.155307	no	-0.0456777	no	N/A	N/A	N/A	N/A	N/A	N	N/A	N/A	N/A
N/A	N/A	PPAS0A01170	N/A	N/A	30	N/A	N/A	N/A	N/A	N/A	Y	N	N/A	N/A	N	N/A	N/A	N/A	N/A	N/A	N/A	N/A	-2.89013	yes	0.173701	no	N/A	N/A	N/A	N/A	N/A	Y	N/A	N/A	N/A
N/A	N/A	PPAS0A01210	N/A	N/A	31	N/A	N/A	N/A	N/A	N/A	Y	N	N/A	N/A	N	N/A	N/A	N/A	N/A	N/A	N/A	N/A	0	no	0	no	N/A	N/A	N/A	N/A	N/A	N	N/A	N/A	N/A
N/A	N/A	PPAS0A01220	N/A	N/A	32	N/A	N/A	N/A	N/A	N/A	Y	N	N/A	N/A	N	N/A	N/A	N/A	N/A	N/A	N/A	N/A	0	no	0	no	N/A	N/A	N/A	N/A	N/A	N	N/A	N/A	N/A
N/A	N/A	PPAS0A01270	N/A	N/A	33	N/A	N/A	N/A	N/A	N/A	N	N	N/A	N/A	N	N/A	N/A	N/A	N/A	N/A	N/A	N/A	-0.234365	no	0.190339	no	N/A	N/A	N/A	N/A	N/A	Y	N/A	N/A	N/A
N/A	N/A	PPAS0A01280	N/A	N/A	34	N/A	N/A	N/A	N/A	N/A	N	N	N/A	N/A	N	N/A	N/A	N/A	N/A	N/A	N/A	N/A	-0.234365	no	0.190339	no	N/A	N/A	N/A	N/A	N/A	N	N/A	N/A	N/A
N/A	N/A	PPAS0A01290	N/A	N/A	35	N/A	N/A	N/A	N/A	N/A	N	N	N/A	N/A	N	N/A	N/A	N/A	N/A	N/A	N/A	N/A	-0.234365	no	0.190339	no	N/A	N/A	N/A	N/A	N/A	N	N/A	N/A	N/A
N/A	N/A	PPAS0A01300	N/A	N/A	36	N/A	N/A	N/A	N/A	N/A	N	N	N/A	N/A	N	N/A	N/A	N/A	N/A	N/A	N/A	N/A	-0.234365	no	0.190339	no	N/A	N/A	N/A	N/A	N/A	N	N/A	N/A	N/A
N/A	N/A	PPAS0A01330	N/A	N/A	37	N/A	N/A	N/A	N/A	N/A	N	N	N/A	N/A	N	N/A	N/A	N/A	N/A	N/A	N/A	N/A	N/A	N/A	N/A	N/A	N/A	N/A	N/A	N/A	N/A	Y	N/A	N/A	N/A
N/A	N/A	PPAS0A01380	N/A	N/A	38	N/A	N/A	N/A	N/A	N/A	N	N	N/A	N/A	N	N/A	N/A	N/A	N/A	N/A	N/A	N/A	N/A	N/A	N/A	N/A	N/A	N/A	N/A	N/A	N/A	N	N/A	N/A	N/A
N/A	N/A	PPAS0A01450	N/A	N/A	39	N/A	N/A	N/A	N/A	N/A	N	N	N/A	N/A	N	N/A	N/A	N/A	N/A	N/A	N/A	N/A	N/A	N/A	N/A	N/A	N/A	N/A	N/A	N/A	N/A	Y	N/A	N/A	N/A
N/A	N/A	PPAS0A01500	N/A	N/A	40	N/A	N/A	N/A	N/A	N/A	N	N	N/A	N/A	N	N/A	N/A	N/A	N/A	N/A	N/A	N/A	N/A	N/A	N/A	N/A	N/A	N/A	N/A	N/A	N/A	Y	N/A	N/A	N/A
N/A	N/A	PPAS0A01530	N/A	N/A	41	N/A	N/A	N/A	N/A	N/A	Y	N	N/A	N/A	N	N/A	N/A	N/A	N/A	N/A	N/A	N/A	2.59162	yes	0.0605336	no	N/A	N/A	N/A	N/A	N/A	N	N/A	N/A	N/A
N/A	N/A	PPAS0A01540	N/A	N/A	42	N/A	N/A	N/A	N/A	N/A	Y	N	N/A	N/A	N	N/A	N/A	N/A	N/A	N/A	N/A	N/A	N/A	N/A	N/A	N/A	N/A	N/A	N/A	N/A	N/A	Y	N/A	N/A	N/A
N/A	N/A	PPAS0A01550	N/A	N/A	43	N/A	N/A	N/A	N/A	N/A	N	N	N/A	N/A	N	N/A	N/A	N/A	N/A	N/A	N/A	N/A	N/A	N/A	N/A	N/A	N/A	N/A	N/A	N/A	N/A	N	N/A	N/A	N/A
N/A	N/A	PPAS0A01560	N/A	N/A	44	N/A	N/A	N/A	N/A	N/A	N	N	N/A	N/A	N	N/A	N/A	N/A	N/A	N/A	N/A	N/A	-1.84424	yes	0.269407	no	N/A	N/A	N/A	N/A	N/A	N	N/A	N/A	N/A
N/A	N/A	PPAS0A01630	N/A	N/A	45	N/A	N/A	N/A	N/A	N/A	N	N	N/A	N/A	N	N/A	N/A	N/A	N/A	N/A	N/A	N/A	N/A	N/A	N/A	N/A	N/A	N/A	N/A	N/A	N/A	N	N/A	N/A	N/A
N/A	N/A	PPAS0A01660	N/A	N/A	46	N/A	N/A	N/A	N/A	N/A	N	N	N/A	N/A	N	N/A	N/A	N/A	N/A	N/A	N/A	N/A	0.813566	yes	0.123645	no	N/A	N/A	N/A	N/A	N/A	Y	N/A	N/A	N/A
N/A	N/A	PPAS0A01690	N/A	N/A	47	N/A	N/A	N/A	N/A	N/A	N	N	N/A	N/A	N	N/A	N/A	N/A	N/A	N/A	N/A	N/A	1.56214	no	-0.106063	no	N/A	N/A	N/A	N/A	N/A	N	N/A	N/A	N/A
N/A	N/A	PPAS0A01700	N/A	N/A	48	N/A	N/A	N/A	N/A	N/A	Y	N	N/A	N/A	N	N/A	N/A	N/A	N/A	N/A	N/A	N/A	6.34082	yes	0.0250302	no	N/A	N/A	N/A	N/A	N/A	Y	N/A	N/A	N/A
N/A	N/A	PPAS0A01720	N/A	N/A	49	N/A	N/A	N/A	N/A	N/A	N	N	N/A	N/A	N	N/A	N/A	N/A	N/A	N/A	N/A	N/A	-1.27858	yes	0.65747	no	N/A	N/A	N/A	N/A	N/A	N	N/A	N/A	N/A
N/A	N/A	PPAS0A01740	N/A	N/A	50	N/A	N/A	N/A	N/A	N/A	N	N	N/A	N/A	N	N/A	N/A	N/A	N/A	N/A	N/A	N/A	4.72426	yes	-0.253032	no	N/A	N/A	N/A	N/A	N/A	N	N/A	N/A	N/A
N/A	N/A	PPAS0A01760	N/A	N/A	51	N/A	N/A	N/A	N/A	N/A	N	N	N/A	N/A	N	N/A	N/A	N/A	N/A	N/A	N/A	N/A	N/A	N/A	N/A	N/A	N/A	N/A	N/A	N/A	N/A	N	N/A	N/A	N/A
N/A	N/A	PPAS0A01780	N/A	N/A	52	N/A	N/A	N/A	N/A	N/A	N	N	N/A	N/A	N	N/A	N/A	N/A	N/A	N/A	N/A	N/A	-0.307469	no	0.148768	no	N/A	N/A	N/A	N/A	N/A	Y	N/A	N/A	N/A
N/A	N/A	PPAS0A01830	N/A	N/A	53	N/A	N/A	N/A	N/A	N/A	N	N	N/A	N/A	N	N/A	N/A	N/A	N/A	N/A	N/A	N/A	0.112125	no	0.3885	no	N/A	N/A	N/A	N/A	N/A	N	N/A	N/A	N/A
N/A	N/A	PPAS0A01950	N/A	N/A	54	N/A	N/A	N/A	N/A	N/A	N	N	N/A	N/A	N	N/A	N/A	N/A	N/A	N/A	N/A	N/A	-0.04109	no	0.30512	no	N/A	N/A	N/A	N/A	N/A	Y	N/A	N/A	N/A
N/A	N/A	PPAS0A02010	N/A	N/A	55	N/A	N/A	N/A	N/A	N/A	Y	N	N/A	N/A	N	N/A	N/A	N/A	N/A	N/A	N/A	N/A	2.24586	yes	-0.722324	no	N/A	N/A	N/A	N/A	N/A	Y	N/A	N/A	N/A
N/A	N/A	PPAS0A02020	N/A	N/A	56	N/A	N/A	N/A	N/A	N/A	N	N	N/A	N/A	N	N/A	N/A	N/A	N/A	N/A	N/A	N/A	-1.49671	no	0.0741813	no	N/A	N/A	N/A	N/A	N/A	Y	N/A	N/A	N/A
N/A	N/A	PPAS0A02030	N/A	N/A	57	N/A	N/A	N/A	N/A	N/A	N	N	N/A	N/A	N	N/A	N/A	N/A	N/A	N/A	N/A	N/A	2.21472	yes	0.19965	no	N/A	N/A	N/A	N/A	N/A	N	N/A	N/A	N/A
N/A	N/A	PPAS0A02060	N/A	N/A	58	N/A	N/A	N/A	N/A	N/A	N	N	N/A	N/A	N	N/A	N/A	N/A	N/A	N/A	N/A	N/A	1.38168	yes	-0.619712	no	N/A	N/A	N/A	N/A	N/A	N	N/A	N/A	N/A
N/A	N/A	PPAS0A02110	N/A	N/A	59	N/A	N/A	N/A	N/A	N/A	N	N	N/A	N/A	N	N/A	N/A	N/A	N/A	N/A	N/A	N/A	N/A	N/A	N/A	N/A	N/A	N/A	N/A	N/A	N/A	N	N/A	N/A	N/A
N/A	N/A	PPAS0A02120	N/A	N/A	60	N/A	N/A	N/A	N/A	N/A	Y	N	N/A	N/A	N	N/A	N/A	N/A	N/A	N/A	N/A	N/A	N/A	N/A	N/A	N/A	N/A	N/A	N/A	N/A	N/A	N	N/A	N/A	N/A
N/A	N/A	PPAS0A02130	N/A	N/A	61	N/A	N/A	N/A	N/A	N/A	Y	N	N/A	N/A	N	N/A	N/A	N/A	N/A	N/A	N/A	N/A	0.560821	no	0.14606	no	N/A	N/A	N/A	N/A	N/A	N	N/A	N/A	N/A
N/A	N/A	PPAS0A02140	N/A	N/A	62	N/A	N/A	N/A	N/A	N/A	N	N	N/A	N/A	N	N/A	N/A	N/A	N/A	N/A	N/A	N/A	0.79379	yes	0.190851	no	N/A	N/A	N/A	N/A	N/A	N	N/A	N/A	N/A
N/A	N/A	PPAS0A02210	N/A	N/A	63	N/A	N/A	N/A	N/A	N/A	Y	N	N/A	N/A	N	N/A	N/A	N/A	N/A	N/A	N/A	N/A	1.34869	no	-1.81815	no	N/A	N/A	N/A	N/A	N/A	N	N/A	N/A	N/A
N/A	N/A	PPAS0A02230	N/A	N/A	64	N/A	N/A	N/A	N/A	N/A	Y	N	N/A	N/A	N	N/A	N/A	N/A	N/A	N/A	N/A	N/A	-1.88476	yes	-0.0435877	no	N/A	N/A	N/A	N/A	N/A	Y	N/A	N/A	N/A
N/A	N/A	PPAS0A02280	N/A	N/A	65	N/A	N/A	N/A	N/A	N/A	N	N	N/A	N/A	N	N/A	N/A	N/A	N/A	N/A	N/A	N/A	2.66222	yes	0.484841	no	N/A	N/A	N/A	N/A	N/A	N	N/A	N/A	N/A
N/A	N/A	PPAS0A02310	N/A	N/A	66	N/A	N/A	N/A	N/A	N/A	N	N	N/A	N/A	N	N/A	N/A	N/A	N/A	N/A	N/A	N/A	N/A	N/A	N/A	N/A	N/A	N/A	N/A	N/A	N/A	N	N/A	N/A	N/A
N/A	N/A	PPAS0A02330	N/A	N/A	67	N/A	N/A	N/A	N/A	N/A	N	N	N/A	N/A	N	N/A	N/A	N/A	N/A	N/A	N/A	N/A	N/A	N/A	N/A	N/A	N/A	N/A	N/A	N/A	N/A	N	N/A	N/A	N/A
N/A	N/A	PPAS0A02350	N/A	N/A	68	N/A	N/A	N/A	N/A	N/A	Y	N	N/A	N/A	N	N/A	N/A	N/A	N/A	N/A	N/A	N/A	0.627799	no	-0.704829	no	N/A	N/A	N/A	N/A	N/A	Y	N/A	N/A	N/A
N/A	N/A	PPAS0A02490	N/A	N/A	69	N/A	N/A	N/A	N/A	N/A	N	N	N/A	N/A	N	N/A	N/A	N/A	N/A	N/A	N/A	N/A	-2.05179	yes	0.170912	no	N/A	N/A	N/A	N/A	N/A	N	N/A	N/A	N/A
N/A	N/A	PPAS0A02700	N/A	N/A	70	N/A	N/A	N/A	N/A	N/A	N	N	N/A	N/A	N	N/A	N/A	N/A	N/A	N/A	N/A	N/A	2.16984	yes	-1.6021	no	N/A	N/A	N/A	N/A	N/A	N	N/A	N/A	N/A
N/A	N/A	PPAS0A02730	N/A	N/A	71	N/A	N/A	N/A	N/A	N/A	N	N	N/A	N/A	N	N/A	N/A	N/A	N/A	N/A	N/A	N/A	1.33394	yes	-0.390504	no	N/A	N/A	N/A	N/A	N/A	N	N/A	N/A	N/A
N/A	N/A	PPAS0A02770	N/A	N/A	72	N/A	N/A	N/A	N/A	N/A	N	N	N/A	N/A	N	N/A	N/A	N/A	N/A	N/A	N/A	N/A	1.4465	no	0.0952272	no	N/A	N/A	N/A	N/A	N/A	N	N/A	N/A	N/A
N/A	N/A	PPAS0A02780	N/A	N/A	73	N/A	N/A	N/A	N/A	N/A	N	N	N/A	N/A	N	N/A	N/A	N/A	N/A	N/A	N/A	N/A	N/A	N/A	N/A	N/A	N/A	N/A	N/A	N/A	N/A	N	N/A	N/A	N/A
N/A	N/A	PPAS0A02810	N/A	N/A	74	N/A	N/A	N/A	N/A	N/A	N	N	N/A	N/A	N	N/A	N/A	N/A	N/A	N/A	N/A	N/A	N/A	N/A	N/A	N/A	N/A	N/A	N/A	N/A	N/A	N	N/A	N/A	N/A
N/A	N/A	PPAS0A02860	N/A	N/A	75	N/A	N/A	N/A	N/A	N/A	Y	N	N/A	N/A	N	N/A	N/A	N/A	N/A	N/A	N/A	N/A	N/A	N/A	N/A	N/A	N/A	N/A	N/A	N/A	N/A	Y	N/A	N/A	N/A
N/A	N/A	PPAS0A02870	N/A	N/A	76	N/A	N/A	N/A	N/A	N/A	Y	N	N/A	N/A	N	N/A	N/A	N/A	N/A	N/A	N/A	N/A	N/A	N/A	N/A	N/A	N/A	N/A	N/A	N/A	N/A	Y	N/A	N/A	N/A
N/A	N/A	PPAS0A03000	N/A	N/A	77	N/A	N/A	N/A	N/A	N/A	N	N	N/A	N/A	N	N/A	N/A	N/A	N/A	N/A	N/A	N/A	N/A	N/A	N/A	N/A	N/A	N/A	N/A	N/A	N/A	N	N/A	N/A	N/A
N/A	N/A	PPAS0A03030	N/A	N/A	78	N/A	N/A	N/A	N/A	N/A	Y	N	N/A	N/A	N	N/A	N/A	N/A	N/A	N/A	N/A	N/A	-0.437255	no	0.236117	no	N/A	N/A	N/A	N/A	N/A	N	N/A	N/A	N/A
N/A	N/A	PPAS0A03050	N/A	N/A	79	N/A	N/A	N/A	N/A	N/A	N	N	N/A	N/A	N	N/A	N/A	N/A	N/A	N/A	N/A	N/A	-1.84875	yes	0.199017	no	N/A	N/A	N/A	N/A	N/A	N	N/A	N/A	N/A
N/A	N/A	PPAS0A03110	N/A	N/A	80	N/A	N/A	N/A	N/A	N/A	N	N	N/A	N/A	N	N/A	N/A	N/A	N/A	N/A	N/A	N/A	N/A	N/A	N/A	N/A	N/A	N/A	N/A	N/A	N/A	N	N/A	N/A	N/A
N/A	N/A	PPAS0A03130	N/A	N/A	81	N/A	N/A	N/A	N/A	N/A	N	N	N/A	N/A	N	N/A	N/A	N/A	N/A	N/A	N/A	N/A	4.33322	yes	-0.38351	no	N/A	N/A	N/A	N/A	N/A	Y	N/A	N/A	N/A
N/A	N/A	PPAS0A03140	N/A	N/A	82	N/A	N/A	N/A	N/A	N/A	N	N	N/A	N/A	N	N/A	N/A	N/A	N/A	N/A	N/A	N/A	N/A	N/A	N/A	N/A	N/A	N/A	N/A	N/A	N/A	Y	N/A	N/A	N/A
N/A	N/A	PPAS0A03160	N/A	N/A	83	N/A	N/A	N/A	N/A	N/A	N	N	N/A	N/A	N	N/A	N/A	N/A	N/A	N/A	N/A	N/A	-0.203789	no	0.332029	no	N/A	N/A	N/A	N/A	N/A	N	N/A	N/A	N/A
N/A	N/A	PPAS0A03170	N/A	N/A	84	N/A	N/A	N/A	N/A	N/A	Y	N	N/A	N/A	N	N/A	N/A	N/A	N/A	N/A	N/A	N/A	4.16888	yes	-0.565705	no	N/A	N/A	N/A	N/A	N/A	Y	N/A	N/A	N/A
N/A	N/A	PPAS0A03180	N/A	N/A	85	N/A	N/A	N/A	N/A	N/A	Y	N	N/A	N/A	N	N/A	N/A	N/A	N/A	N/A	N/A	N/A	0.595325	no	-0.000345738	no	N/A	N/A	N/A	N/A	N/A	Y	N/A	N/A	N/A
N/A	N/A	PPAS0A03200	N/A	N/A	86	N/A	N/A	N/A	N/A	N/A	N	N	N/A	N/A	N	N/A	N/A	N/A	N/A	N/A	N/A	N/A	N/A	N/A	N/A	N/A	N/A	N/A	N/A	N/A	N/A	N	N/A	N/A	N/A
N/A	N/A	PPAS0A03210	N/A	N/A	87	N/A	N/A	N/A	N/A	N/A	N	N	N/A	N/A	N	N/A	N/A	N/A	N/A	N/A	N/A	N/A	N/A	N/A	N/A	N/A	N/A	N/A	N/A	N/A	N/A	N	N/A	N/A	N/A
N/A	N/A	PPAS0A03280	N/A	N/A	88	N/A	N/A	N/A	N/A	N/A	N	N	N/A	N/A	N	N/A	N/A	N/A	N/A	N/A	N/A	N/A	3.72439	no	0.268043	no	N/A	N/A	N/A	N/A	N/A	N	N/A	N/A	N/A
N/A	N/A	PPAS0A03300	N/A	N/A	89	N/A	N/A	N/A	N/A	N/A	N	N	N/A	N/A	N	N/A	N/A	N/A	N/A	N/A	N/A	N/A	0.142497	no	0.143436	no	N/A	N/A	N/A	N/A	N/A	N	N/A	N/A	N/A
N/A	N/A	PPAS0A03310	N/A	N/A	90	N/A	N/A	N/A	N/A	N/A	N	N	N/A	N/A	N	N/A	N/A	N/A	N/A	N/A	N/A	N/A	0.518886	no	-0.312489	no	N/A	N/A	N/A	N/A	N/A	N	N/A	N/A	N/A
N/A	N/A	PPAS0A03320	N/A	N/A	91	N/A	N/A	N/A	N/A	N/A	N	N	N/A	N/A	N	N/A	N/A	N/A	N/A	N/A	N/A	N/A	1.32589	yes	0.107844	no	N/A	N/A	N/A	N/A	N/A	N	N/A	N/A	N/A
N/A	N/A	PPAS0A03390	N/A	N/A	92	N/A	N/A	N/A	N/A	N/A	N	N	N/A	N/A	N	N/A	N/A	N/A	N/A	N/A	N/A	N/A	-1.08125	no	-0.382143	no	N/A	N/A	N/A	N/A	N/A	N	N/A	N/A	N/A
N/A	N/A	PPAS0A03420	N/A	N/A	93	N/A	N/A	N/A	N/A	N/A	Y	N	N/A	N/A	N	N/A	N/A	N/A	N/A	N/A	N/A	N/A	-1.08125	no	-0.382143	no	N/A	N/A	N/A	N/A	N/A	N	N/A	N/A	N/A
N/A	N/A	PPAS0A03430	N/A	N/A	94	N/A	N/A	N/A	N/A	N/A	N	N	N/A	N/A	N	N/A	N/A	N/A	N/A	N/A	N/A	N/A	-1.08125	no	-0.382143	no	N/A	N/A	N/A	N/A	N/A	Y	N/A	N/A	N/A
N/A	N/A	PPAS0A03460	N/A	N/A	95	N/A	N/A	N/A	N/A	N/A	N	N	N/A	N/A	N	N/A	N/A	N/A	N/A	N/A	N/A	N/A	1.86972	yes	0.0242162	no	N/A	N/A	N/A	N/A	N/A	N	N/A	N/A	N/A
N/A	N/A	PPAS0A03470	N/A	N/A	96	N/A	N/A	N/A	N/A	N/A	N	N	N/A	N/A	N	N/A	N/A	N/A	N/A	N/A	N/A	N/A	1.21995	yes	0.19178	no	N/A	N/A	N/A	N/A	N/A	N	N/A	N/A	N/A
N/A	N/A	PPAS0A03480	N/A	N/A	97	N/A	N/A	N/A	N/A	N/A	N	N	N/A	N/A	N	N/A	N/A	N/A	N/A	N/A	N/A	N/A	N/A	N/A	N/A	N/A	N/A	N/A	N/A	N/A	N/A	N	N/A	N/A	N/A
N/A	N/A	PPAS0A03490	N/A	N/A	98	N/A	N/A	N/A	N/A	N/A	N	N	N/A	N/A	N	N/A	N/A	N/A	N/A	N/A	N/A	N/A	-0.248547	no	0.0064421	no	N/A	N/A	N/A	N/A	N/A	N	N/A	N/A	N/A
N/A	N/A	PPAS0A03500	N/A	N/A	99	N/A	N/A	N/A	N/A	N/A	N	N	N/A	N/A	N	N/A	N/A	N/A	N/A	N/A	N/A	N/A	0.0267595	no	0.195857	no	N/A	N/A	N/A	N/A	N/A	N	N/A	N/A	N/A
N/A	N/A	PPAS0A03610	N/A	N/A	100	N/A	N/A	N/A	N/A	N/A	N	N	N/A	N/A	N	N/A	N/A	N/A	N/A	N/A	N/A	N/A	-1.38795	no	0.229558	no	N/A	N/A	N/A	N/A	N/A	Y	N/A	N/A	N/A
N/A	N/A	PPAS0A03620	N/A	N/A	101	N/A	N/A	N/A	N/A	N/A	Y	N	N/A	N/A	N	N/A	N/A	N/A	N/A	N/A	N/A	N/A	0.358003	no	-1.87577	yes	N/A	N/A	N/A	N/A	N/A	N	N/A	N/A	N/A
N/A	N/A	PPAS0A03630	N/A	N/A	102	N/A	N/A	N/A	N/A	N/A	Y	N	N/A	N/A	N	N/A	N/A	N/A	N/A	N/A	N/A	N/A	N/A	N/A	N/A	N/A	N/A	N/A	N/A	N/A	N/A	N	N/A	N/A	N/A
N/A	N/A	PPAS0A03660	N/A	N/A	103	N/A	N/A	N/A	N/A	N/A	Y	N	N/A	N/A	N	N/A	N/A	N/A	N/A	N/A	N/A	N/A	-0.178913	no	0.0434592	no	N/A	N/A	N/A	N/A	N/A	Y	N/A	N/A	N/A
N/A	N/A	PPAS0A03670	N/A	N/A	104	N/A	N/A	N/A	N/A	N/A	N	N	N/A	N/A	N	N/A	N/A	N/A	N/A	N/A	N/A	N/A	-1.45234	yes	0.12173	no	N/A	N/A	N/A	N/A	N/A	N	N/A	N/A	N/A
N/A	N/A	PPAS0A03680	N/A	N/A	105	N/A	N/A	N/A	N/A	N/A	N	N	N/A	N/A	N	N/A	N/A	N/A	N/A	N/A	N/A	N/A	0.88814	no	-0.0316466	no	N/A	N/A	N/A	N/A	N/A	N	N/A	N/A	N/A
N/A	N/A	PPAS0A03690	N/A	N/A	106	N/A	N/A	N/A	N/A	N/A	N	N	N/A	N/A	N	N/A	N/A	N/A	N/A	N/A	N/A	N/A	-0.13424	no	0.15876	no	N/A	N/A	N/A	N/A	N/A	N	N/A	N/A	N/A
N/A	N/A	PPAS0A03710	N/A	N/A	107	N/A	N/A	N/A	N/A	N/A	N	N	N/A	N/A	N	N/A	N/A	N/A	N/A	N/A	N/A	N/A	-0.201071	no	0.159823	no	N/A	N/A	N/A	N/A	N/A	N	N/A	N/A	N/A
N/A	N/A	PPAS0A03720	N/A	N/A	108	N/A	N/A	N/A	N/A	N/A	N	N	N/A	N/A	N	N/A	N/A	N/A	N/A	N/A	N/A	N/A	-0.201071	no	0.159823	no	N/A	N/A	N/A	N/A	N/A	N	N/A	N/A	N/A
N/A	N/A	PPAS0A03780	N/A	N/A	109	N/A	N/A	N/A	N/A	N/A	Y	N	N/A	N/A	N	N/A	N/A	N/A	N/A	N/A	N/A	N/A	0.680269	no	-0.459161	no	N/A	N/A	N/A	N/A	N/A	N	N/A	N/A	N/A
N/A	N/A	PPAS0A03800	N/A	N/A	110	N/A	N/A	N/A	N/A	N/A	N	N	N/A	N/A	N	N/A	N/A	N/A	N/A	N/A	N/A	N/A	8.05847	yes	0.459458	no	N/A	N/A	N/A	N/A	N/A	N	N/A	N/A	N/A
N/A	N/A	PPAS0A03810	N/A	N/A	111	N/A	N/A	N/A	N/A	N/A	N	N	N/A	N/A	N	N/A	N/A	N/A	N/A	N/A	N/A	N/A	-0.0709153	no	0.273797	no	N/A	N/A	N/A	N/A	N/A	N	N/A	N/A	N/A
N/A	N/A	PPAS0A03820	N/A	N/A	112	N/A	N/A	N/A	N/A	N/A	N	N	N/A	N/A	N	N/A	N/A	N/A	N/A	N/A	N/A	N/A	-0.612266	no	-0.006179	no	N/A	N/A	N/A	N/A	N/A	N	N/A	N/A	N/A
N/A	N/A	PPAS0A03860	N/A	N/A	113	N/A	N/A	N/A	N/A	N/A	N	N	N/A	N/A	N	N/A	N/A	N/A	N/A	N/A	N/A	N/A	-0.678886	yes	0.44464	no	N/A	N/A	N/A	N/A	N/A	N	N/A	N/A	N/A
N/A	N/A	PPAS0A03870	N/A	N/A	114	N/A	N/A	N/A	N/A	N/A	N	N	N/A	N/A	N	N/A	N/A	N/A	N/A	N/A	N/A	N/A	1.01693	yes	0.171578	no	N/A	N/A	N/A	N/A	N/A	N	N/A	N/A	N/A
N/A	N/A	PPAS0A03890	N/A	N/A	115	N/A	N/A	N/A	N/A	N/A	Y	N	N/A	N/A	N	N/A	N/A	N/A	N/A	N/A	N/A	N/A	-0.0599935	no	0.256002	no	N/A	N/A	N/A	N/A	N/A	Y	N/A	N/A	N/A
N/A	N/A	PPAS0A03920	N/A	N/A	116	N/A	N/A	N/A	N/A	N/A	N	N	N/A	N/A	N	N/A	N/A	N/A	N/A	N/A	N/A	N/A	2.17775	yes	0.336453	no	N/A	N/A	N/A	N/A	N/A	N	N/A	N/A	N/A
N/A	N/A	PPAS0A03970	N/A	N/A	117	N/A	N/A	N/A	N/A	N/A	N	N	N/A	N/A	N	N/A	N/A	N/A	N/A	N/A	N/A	N/A	N/A	N/A	N/A	N/A	N/A	N/A	N/A	N/A	N/A	Y	N/A	N/A	N/A
N/A	N/A	PPAS0A03980	N/A	N/A	118	N/A	N/A	N/A	N/A	N/A	N	N	N/A	N/A	N	N/A	N/A	N/A	N/A	N/A	N/A	N/A	0.0719349	no	-0.0673684	no	N/A	N/A	N/A	N/A	N/A	N	N/A	N/A	N/A
N/A	N/A	PPAS0A04010	N/A	N/A	119	N/A	N/A	N/A	N/A	N/A	N	N	N/A	N/A	N	N/A	N/A	N/A	N/A	N/A	N/A	N/A	-1.26956	yes	0.287526	no	N/A	N/A	N/A	N/A	N/A	N	N/A	N/A	N/A
N/A	N/A	PPAS0A04040	N/A	N/A	120	N/A	N/A	N/A	N/A	N/A	N	N	N/A	N/A	N	N/A	N/A	N/A	N/A	N/A	N/A	N/A	1.2505	no	-0.823223	no	N/A	N/A	N/A	N/A	N/A	N	N/A	N/A	N/A
N/A	N/A	PPAS0A04150	N/A	N/A	121	N/A	N/A	N/A	N/A	N/A	Y	N	N/A	N/A	N	N/A	N/A	N/A	N/A	N/A	N/A	N/A	-0.200022	no	0.0201127	no	N/A	N/A	N/A	N/A	N/A	N	N/A	N/A	N/A
N/A	N/A	PPAS0A04170	N/A	N/A	122	N/A	N/A	N/A	N/A	N/A	Y	N	N/A	N/A	N	N/A	N/A	N/A	N/A	N/A	N/A	N/A	-0.0246353	no	-0.477711	no	N/A	N/A	N/A	N/A	N/A	Y	N/A	N/A	N/A
N/A	N/A	PPAS0A04200	N/A	N/A	123	N/A	N/A	N/A	N/A	N/A	N	N	N/A	N/A	N	N/A	N/A	N/A	N/A	N/A	N/A	N/A	0.769849	no	0.275423	no	N/A	N/A	N/A	N/A	N/A	N	N/A	N/A	N/A
N/A	N/A	PPAS0A04220	N/A	N/A	124	N/A	N/A	N/A	N/A	N/A	N	N	N/A	N/A	N	N/A	N/A	N/A	N/A	N/A	N/A	N/A	0.769849	no	0.275423	no	N/A	N/A	N/A	N/A	N/A	N	N/A	N/A	N/A
N/A	N/A	PPAS0A04230	N/A	N/A	125	N/A	N/A	N/A	N/A	N/A	Y	N	N/A	N/A	N	N/A	N/A	N/A	N/A	N/A	N/A	N/A	-1.95484	no	0.195369	no	N/A	N/A	N/A	N/A	N/A	Y	N/A	N/A	N/A
N/A	N/A	PPAS0A04240	N/A	N/A	126	N/A	N/A	N/A	N/A	N/A	Y	N	N/A	N/A	N	N/A	N/A	N/A	N/A	N/A	N/A	N/A	N/A	N/A	N/A	N/A	N/A	N/A	N/A	N/A	N/A	Y	N/A	N/A	N/A
N/A	N/A	PPAS0A04250	N/A	N/A	127	N/A	N/A	N/A	N/A	N/A	Y	N	N/A	N/A	N	N/A	N/A	N/A	N/A	N/A	N/A	N/A	-2.26666	yes	-0.430834	no	N/A	N/A	N/A	N/A	N/A	N	N/A	N/A	N/A
N/A	N/A	PPAS0A04260	N/A	N/A	128	N/A	N/A	N/A	N/A	N/A	Y	N	N/A	N/A	N	N/A	N/A	N/A	N/A	N/A	N/A	N/A	N/A	N/A	N/A	N/A	N/A	N/A	N/A	N/A	N/A	Y	N/A	N/A	N/A
N/A	N/A	PPAS0A04280	N/A	N/A	129	N/A	N/A	N/A	N/A	N/A	Y	N	N/A	N/A	N	N/A	N/A	N/A	N/A	N/A	N/A	N/A	N/A	N/A	N/A	N/A	N/A	N/A	N/A	N/A	N/A	Y	N/A	N/A	N/A
N/A	N/A	PPAS0A04300	N/A	N/A	130	N/A	N/A	N/A	N/A	N/A	N	N	N/A	N/A	N	N/A	N/A	N/A	N/A	N/A	N/A	N/A	2.42559	yes	0.185808	no	N/A	N/A	N/A	N/A	N/A	Y	N/A	N/A	N/A
N/A	N/A	PPAS0A04420	N/A	N/A	131	N/A	N/A	N/A	N/A	N/A	N	N	N/A	N/A	N	N/A	N/A	N/A	N/A	N/A	N/A	N/A	0.735168	no	0.270171	no	N/A	N/A	N/A	N/A	N/A	N	N/A	N/A	N/A
N/A	N/A	PPAS0A04440	N/A	N/A	132	N/A	N/A	N/A	N/A	N/A	N	N	N/A	N/A	N	N/A	N/A	N/A	N/A	N/A	N/A	N/A	N/A	N/A	N/A	N/A	N/A	N/A	N/A	N/A	N/A	Y	N/A	N/A	N/A
N/A	N/A	PPAS0A04480	N/A	N/A	133	N/A	N/A	N/A	N/A	N/A	Y	N	N/A	N/A	N	N/A	N/A	N/A	N/A	N/A	N/A	N/A	N/A	N/A	N/A	N/A	N/A	N/A	N/A	N/A	N/A	Y	N/A	N/A	N/A
N/A	N/A	PPAS0A04490	N/A	N/A	134	N/A	N/A	N/A	N/A	N/A	Y	N	N/A	N/A	N	N/A	N/A	N/A	N/A	N/A	N/A	N/A	N/A	N/A	N/A	N/A	N/A	N/A	N/A	N/A	N/A	Y	N/A	N/A	N/A
N/A	N/A	PPAS0A04530	N/A	N/A	135	N/A	N/A	N/A	N/A	N/A	Y	N	N/A	N/A	N	N/A	N/A	N/A	N/A	N/A	N/A	N/A	3.96615	yes	-1.06156	yes	N/A	N/A	N/A	N/A	N/A	Y	N/A	N/A	N/A
N/A	N/A	PPAS0A04540	N/A	N/A	136	N/A	N/A	N/A	N/A	N/A	Y	N	N/A	N/A	N	N/A	N/A	N/A	N/A	N/A	N/A	N/A	-2.51356	yes	0.10333	no	N/A	N/A	N/A	N/A	N/A	Y	N/A	N/A	N/A
N/A	N/A	PPAS0A04550	N/A	N/A	137	N/A	N/A	N/A	N/A	N/A	Y	N	N/A	N/A	N	N/A	N/A	N/A	N/A	N/A	N/A	N/A	-2.51356	yes	0.10333	no	N/A	N/A	N/A	N/A	N/A	N	N/A	N/A	N/A
N/A	N/A	PPAS0A04560	N/A	N/A	138	N/A	N/A	N/A	N/A	N/A	N	N	N/A	N/A	N	N/A	N/A	N/A	N/A	N/A	N/A	N/A	-0.192049	no	0.209941	no	N/A	N/A	N/A	N/A	N/A	N	N/A	N/A	N/A
N/A	N/A	PPAS0A04580	N/A	N/A	139	N/A	N/A	N/A	N/A	N/A	N	N	N/A	N/A	N	N/A	N/A	N/A	N/A	N/A	N/A	N/A	0.580552	no	0.134595	no	N/A	N/A	N/A	N/A	N/A	Y	N/A	N/A	N/A
N/A	N/A	PPAS0A04680	N/A	N/A	140	N/A	N/A	N/A	N/A	N/A	Y	N	N/A	N/A	N	N/A	N/A	N/A	N/A	N/A	N/A	N/A	-0.421378	no	0.213213	no	N/A	N/A	N/A	N/A	N/A	N	N/A	N/A	N/A
N/A	N/A	PPAS0A04690	N/A	N/A	141	N/A	N/A	N/A	N/A	N/A	N	N	N/A	N/A	N	N/A	N/A	N/A	N/A	N/A	N/A	N/A	1.93325	yes	0.199545	no	N/A	N/A	N/A	N/A	N/A	N	N/A	N/A	N/A
N/A	N/A	PPAS0A04740	N/A	N/A	142	N/A	N/A	N/A	N/A	N/A	N	N	N/A	N/A	N	N/A	N/A	N/A	N/A	N/A	N/A	N/A	-0.700755	no	-0.0636106	no	N/A	N/A	N/A	N/A	N/A	N	N/A	N/A	N/A
N/A	N/A	PPAS0A04910	N/A	N/A	143	N/A	N/A	N/A	N/A	N/A	N	N	N/A	N/A	N	N/A	N/A	N/A	N/A	N/A	N/A	N/A	0.0989194	no	0.320791	no	N/A	N/A	N/A	N/A	N/A	N	N/A	N/A	N/A
N/A	N/A	PPAS0A04970	N/A	N/A	144	N/A	N/A	N/A	N/A	N/A	N	N	N/A	N/A	N	N/A	N/A	N/A	N/A	N/A	N/A	N/A	-1.71948	no	0.260357	no	N/A	N/A	N/A	N/A	N/A	N	N/A	N/A	N/A
N/A	N/A	PPAS0A04980	N/A	N/A	145	N/A	N/A	N/A	N/A	N/A	N	N	N/A	N/A	N	N/A	N/A	N/A	N/A	N/A	N/A	N/A	-1.71948	no	0.260357	no	N/A	N/A	N/A	N/A	N/A	Y	N/A	N/A	N/A
N/A	N/A	PPAS0A04990	N/A	N/A	146	N/A	N/A	N/A	N/A	N/A	N	N	N/A	N/A	N	N/A	N/A	N/A	N/A	N/A	N/A	N/A	-1.71948	no	0.260357	no	N/A	N/A	N/A	N/A	N/A	N	N/A	N/A	N/A
N/A	N/A	PPAS0A05040	N/A	N/A	147	N/A	N/A	N/A	N/A	N/A	Y	N	N/A	N/A	N	N/A	N/A	N/A	N/A	N/A	N/A	N/A	0.519453	no	0.11227	no	N/A	N/A	N/A	N/A	N/A	Y	N/A	N/A	N/A
N/A	N/A	PPAS0A05070	N/A	N/A	148	N/A	N/A	N/A	N/A	N/A	Y	N	N/A	N/A	N	N/A	N/A	N/A	N/A	N/A	N/A	N/A	0.575441	no	-0.485904	no	N/A	N/A	N/A	N/A	N/A	N	N/A	N/A	N/A
N/A	N/A	PPAS0A05080	N/A	N/A	149	N/A	N/A	N/A	N/A	N/A	N	N	N/A	N/A	N	N/A	N/A	N/A	N/A	N/A	N/A	N/A	0.575441	no	-0.485904	no	N/A	N/A	N/A	N/A	N/A	N	N/A	N/A	N/A
N/A	N/A	PPAS0A05090	N/A	N/A	150	N/A	N/A	N/A	N/A	N/A	N	N	N/A	N/A	N	N/A	N/A	N/A	N/A	N/A	N/A	N/A	0.575441	no	-0.485904	no	N/A	N/A	N/A	N/A	N/A	N	N/A	N/A	N/A
N/A	N/A	PPAS0A05110	N/A	N/A	151	N/A	N/A	N/A	N/A	N/A	Y	N	N/A	N/A	N	N/A	N/A	N/A	N/A	N/A	N/A	N/A	-2.06947	no	0.176254	no	N/A	N/A	N/A	N/A	N/A	N	N/A	N/A	N/A
N/A	N/A	PPAS0A05130	N/A	N/A	152	N/A	N/A	N/A	N/A	N/A	N	N	N/A	N/A	N	N/A	N/A	N/A	N/A	N/A	N/A	N/A	-2.68364	yes	0.0158524	no	N/A	N/A	N/A	N/A	N/A	N	N/A	N/A	N/A
N/A	N/A	PPAS0A05140	N/A	N/A	153	N/A	N/A	N/A	N/A	N/A	N	N	N/A	N/A	N	N/A	N/A	N/A	N/A	N/A	N/A	N/A	0.605735	no	0.175292	no	N/A	N/A	N/A	N/A	N/A	N	N/A	N/A	N/A
N/A	N/A	PPAS0A05150	N/A	N/A	154	N/A	N/A	N/A	N/A	N/A	N	N	N/A	N/A	N	N/A	N/A	N/A	N/A	N/A	N/A	N/A	0.727727	no	0.139378	no	N/A	N/A	N/A	N/A	N/A	N	N/A	N/A	N/A
N/A	N/A	PPAS0A05160	N/A	N/A	155	N/A	N/A	N/A	N/A	N/A	N	N	N/A	N/A	N	N/A	N/A	N/A	N/A	N/A	N/A	N/A	1.29677	no	0.349296	no	N/A	N/A	N/A	N/A	N/A	N	N/A	N/A	N/A
N/A	N/A	PPAS0A05180	N/A	N/A	156	N/A	N/A	N/A	N/A	N/A	Y	N	N/A	N/A	N	N/A	N/A	N/A	N/A	N/A	N/A	N/A	3.74584	yes	0.244079	no	N/A	N/A	N/A	N/A	N/A	N	N/A	N/A	N/A
N/A	N/A	PPAS0A05190	N/A	N/A	157	N/A	N/A	N/A	N/A	N/A	N	N	N/A	N/A	N	N/A	N/A	N/A	N/A	N/A	N/A	N/A	3.74584	yes	0.244079	no	N/A	N/A	N/A	N/A	N/A	N	N/A	N/A	N/A
N/A	N/A	PPAS0A05240	N/A	N/A	158	N/A	N/A	N/A	N/A	N/A	N	N	N/A	N/A	N	N/A	N/A	N/A	N/A	N/A	N/A	N/A	N/A	N/A	N/A	N/A	N/A	N/A	N/A	N/A	N/A	Y	N/A	N/A	N/A
N/A	N/A	PPAS0A05250	N/A	N/A	159	N/A	N/A	N/A	N/A	N/A	N	N	N/A	N/A	N	N/A	N/A	N/A	N/A	N/A	N/A	N/A	-0.735898	no	0.290711	no	N/A	N/A	N/A	N/A	N/A	N	N/A	N/A	N/A
N/A	N/A	PPAS0A05260	N/A	N/A	160	N/A	N/A	N/A	N/A	N/A	N	N	N/A	N/A	N	N/A	N/A	N/A	N/A	N/A	N/A	N/A	-0.735898	no	0.290711	no	N/A	N/A	N/A	N/A	N/A	Y	N/A	N/A	N/A
N/A	N/A	PPAS0A05270	N/A	N/A	161	N/A	N/A	N/A	N/A	N/A	N	N	N/A	N/A	N	N/A	N/A	N/A	N/A	N/A	N/A	N/A	-0.889968	no	-0.0920654	no	N/A	N/A	N/A	N/A	N/A	N	N/A	N/A	N/A
N/A	N/A	PPAS0A05420	N/A	N/A	162	N/A	N/A	N/A	N/A	N/A	N	N	N/A	N/A	N	N/A	N/A	N/A	N/A	N/A	N/A	N/A	0.324049	no	0.276988	no	N/A	N/A	N/A	N/A	N/A	N	N/A	N/A	N/A
N/A	N/A	PPAS0A05440	N/A	N/A	163	N/A	N/A	N/A	N/A	N/A	N	N	N/A	N/A	N	N/A	N/A	N/A	N/A	N/A	N/A	N/A	-0.986129	yes	0.0702731	no	N/A	N/A	N/A	N/A	N/A	N	N/A	N/A	N/A
N/A	N/A	PPAS0A05450	N/A	N/A	164	N/A	N/A	N/A	N/A	N/A	N	N	N/A	N/A	N	N/A	N/A	N/A	N/A	N/A	N/A	N/A	N/A	N/A	N/A	N/A	N/A	N/A	N/A	N/A	N/A	N	N/A	N/A	N/A
N/A	N/A	PPAS0A05480	N/A	N/A	165	N/A	N/A	N/A	N/A	N/A	N	N	N/A	N/A	N	N/A	N/A	N/A	N/A	N/A	N/A	N/A	-0.119907	no	-0.337054	no	N/A	N/A	N/A	N/A	N/A	N	N/A	N/A	N/A
N/A	N/A	PPAS0A05530	N/A	N/A	166	N/A	N/A	N/A	N/A	N/A	N	N	N/A	N/A	N	N/A	N/A	N/A	N/A	N/A	N/A	N/A	N/A	N/A	N/A	N/A	N/A	N/A	N/A	N/A	N/A	N	N/A	N/A	N/A
N/A	N/A	PPAS0A05570	N/A	N/A	167	N/A	N/A	N/A	N/A	N/A	N	N	N/A	N/A	N	N/A	N/A	N/A	N/A	N/A	N/A	N/A	N/A	N/A	N/A	N/A	N/A	N/A	N/A	N/A	N/A	N	N/A	N/A	N/A
N/A	N/A	PPAS0A05580	N/A	N/A	168	N/A	N/A	N/A	N/A	N/A	N	N	N/A	N/A	N	N/A	N/A	N/A	N/A	N/A	N/A	N/A	-0.26541	no	0.291019	no	N/A	N/A	N/A	N/A	N/A	Y	N/A	N/A	N/A
N/A	N/A	PPAS0A05600	N/A	N/A	169	N/A	N/A	N/A	N/A	N/A	N	N	N/A	N/A	N	N/A	N/A	N/A	N/A	N/A	N/A	N/A	-1.31286	no	0.195559	no	N/A	N/A	N/A	N/A	N/A	N	N/A	N/A	N/A
N/A	N/A	PPAS0A05700	N/A	N/A	170	N/A	N/A	N/A	N/A	N/A	N	N	N/A	N/A	N	N/A	N/A	N/A	N/A	N/A	N/A	N/A	0.399647	no	0.261812	no	N/A	N/A	N/A	N/A	N/A	Y	N/A	N/A	N/A
N/A	N/A	PPAS0A05710	N/A	N/A	171	N/A	N/A	N/A	N/A	N/A	N	N	N/A	N/A	N	N/A	N/A	N/A	N/A	N/A	N/A	N/A	1.65989	yes	-0.0845977	no	N/A	N/A	N/A	N/A	N/A	Y	N/A	N/A	N/A
N/A	N/A	PPAS0A05720	N/A	N/A	172	N/A	N/A	N/A	N/A	N/A	N	N	N/A	N/A	N	N/A	N/A	N/A	N/A	N/A	N/A	N/A	0.806286	no	-0.0993715	no	N/A	N/A	N/A	N/A	N/A	N	N/A	N/A	N/A
N/A	N/A	PPAS0A05740	N/A	N/A	173	N/A	N/A	N/A	N/A	N/A	N	N	N/A	N/A	N	N/A	N/A	N/A	N/A	N/A	N/A	N/A	3.49641	yes	-0.459263	no	N/A	N/A	N/A	N/A	N/A	N	N/A	N/A	N/A
N/A	N/A	PPAS0A05770	N/A	N/A	174	N/A	N/A	N/A	N/A	N/A	N	N	N/A	N/A	N	N/A	N/A	N/A	N/A	N/A	N/A	N/A	N/A	N/A	N/A	N/A	N/A	N/A	N/A	N/A	N/A	N	N/A	N/A	N/A
N/A	N/A	PPAS0A05780	N/A	N/A	175	N/A	N/A	N/A	N/A	N/A	Y	N	N/A	N/A	N	N/A	N/A	N/A	N/A	N/A	N/A	N/A	-0.243434	no	0.108866	no	N/A	N/A	N/A	N/A	N/A	Y	N/A	N/A	N/A
N/A	N/A	PPAS0A05790	N/A	N/A	176	N/A	N/A	N/A	N/A	N/A	Y	N	N/A	N/A	N	N/A	N/A	N/A	N/A	N/A	N/A	N/A	3.42577	yes	0.403706	no	N/A	N/A	N/A	N/A	N/A	Y	N/A	N/A	N/A
N/A	N/A	PPAS0A05800	N/A	N/A	177	N/A	N/A	N/A	N/A	N/A	N	N	N/A	N/A	N	N/A	N/A	N/A	N/A	N/A	N/A	N/A	N/A	N/A	N/A	N/A	N/A	N/A	N/A	N/A	N/A	N	N/A	N/A	N/A
N/A	N/A	PPAS0A05830	N/A	N/A	178	N/A	N/A	N/A	N/A	N/A	N	N	N/A	N/A	N	N/A	N/A	N/A	N/A	N/A	N/A	N/A	N/A	N/A	N/A	N/A	N/A	N/A	N/A	N/A	N/A	N	N/A	N/A	N/A
N/A	N/A	PPAS0A05860	N/A	N/A	179	N/A	N/A	N/A	N/A	N/A	N	N	N/A	N/A	N	N/A	N/A	N/A	N/A	N/A	N/A	N/A	2.66415	yes	0.327086	no	N/A	N/A	N/A	N/A	N/A	N	N/A	N/A	N/A
N/A	N/A	PPAS0A05900	N/A	N/A	180	N/A	N/A	N/A	N/A	N/A	N	N	N/A	N/A	N	N/A	N/A	N/A	N/A	N/A	N/A	N/A	-0.847395	yes	-0.0135675	no	N/A	N/A	N/A	N/A	N/A	N	N/A	N/A	N/A
N/A	N/A	PPAS0A05910	N/A	N/A	181	N/A	N/A	N/A	N/A	N/A	N	N	N/A	N/A	N	N/A	N/A	N/A	N/A	N/A	N/A	N/A	-0.67759	yes	-0.218489	no	N/A	N/A	N/A	N/A	N/A	N	N/A	N/A	N/A
N/A	N/A	PPAS0A06030	N/A	N/A	182	N/A	N/A	N/A	N/A	N/A	Y	N	N/A	N/A	N	N/A	N/A	N/A	N/A	N/A	N/A	N/A	N/A	N/A	N/A	N/A	N/A	N/A	N/A	N/A	N/A	Y	N/A	N/A	N/A
N/A	N/A	PPAS0A06130	N/A	N/A	183	N/A	N/A	N/A	N/A	N/A	N	N	N/A	N/A	N	N/A	N/A	N/A	N/A	N/A	N/A	N/A	-1.0526	yes	-0.312657	no	N/A	N/A	N/A	N/A	N/A	N	N/A	N/A	N/A
N/A	N/A	PPAS0A06140	N/A	N/A	184	N/A	N/A	N/A	N/A	N/A	N	N	N/A	N/A	N	N/A	N/A	N/A	N/A	N/A	N/A	N/A	1.00076	yes	0.0112685	no	N/A	N/A	N/A	N/A	N/A	N	N/A	N/A	N/A
N/A	N/A	PPAS0A06150	N/A	N/A	185	N/A	N/A	N/A	N/A	N/A	N	N	N/A	N/A	N	N/A	N/A	N/A	N/A	N/A	N/A	N/A	2.40101	yes	0.304082	no	N/A	N/A	N/A	N/A	N/A	N	N/A	N/A	N/A
N/A	N/A	PPAS0A06160	N/A	N/A	186	N/A	N/A	N/A	N/A	N/A	Y	N	N/A	N/A	N	N/A	N/A	N/A	N/A	N/A	N/A	N/A	N/A	N/A	N/A	N/A	N/A	N/A	N/A	N/A	N/A	Y	N/A	N/A	N/A
N/A	N/A	PPAS0A06200	N/A	N/A	187	N/A	N/A	N/A	N/A	N/A	N	N	N/A	N/A	N	N/A	N/A	N/A	N/A	N/A	N/A	N/A	-0.16146	no	0.118516	no	N/A	N/A	N/A	N/A	N/A	N	N/A	N/A	N/A
N/A	N/A	PPAS0A06230	N/A	N/A	188	N/A	N/A	N/A	N/A	N/A	Y	N	N/A	N/A	N	N/A	N/A	N/A	N/A	N/A	N/A	N/A	2.75716	yes	-0.531144	no	N/A	N/A	N/A	N/A	N/A	Y	N/A	N/A	N/A
N/A	N/A	PPAS0A06280	N/A	N/A	189	N/A	N/A	N/A	N/A	N/A	N	N	N/A	N/A	N	N/A	N/A	N/A	N/A	N/A	N/A	N/A	3.64354	yes	-4.02955	yes	N/A	N/A	N/A	N/A	N/A	Y	N/A	N/A	N/A
N/A	N/A	PPAS0A06390	N/A	N/A	190	N/A	N/A	N/A	N/A	N/A	Y	N	N/A	N/A	N	N/A	N/A	N/A	N/A	N/A	N/A	N/A	5.42548	yes	-3.58079	yes	N/A	N/A	N/A	N/A	N/A	Y	N/A	N/A	N/A
N/A	N/A	PPAS0A06440	N/A	N/A	191	N/A	N/A	N/A	N/A	N/A	N	N	N/A	N/A	N	N/A	N/A	N/A	N/A	N/A	N/A	N/A	2.2282	yes	-0.147678	no	N/A	N/A	N/A	N/A	N/A	N	N/A	N/A	N/A
N/A	N/A	PPAS0A06460	N/A	N/A	192	N/A	N/A	N/A	N/A	N/A	Y	N	N/A	N/A	N	N/A	N/A	N/A	N/A	N/A	N/A	N/A	N/A	N/A	N/A	N/A	N/A	N/A	N/A	N/A	N/A	Y	N/A	N/A	N/A
N/A	N/A	PPAS0A06470	N/A	N/A	193	N/A	N/A	N/A	N/A	N/A	Y	N	N/A	N/A	N	N/A	N/A	N/A	N/A	N/A	N/A	N/A	N/A	N/A	N/A	N/A	N/A	N/A	N/A	N/A	N/A	Y	N/A	N/A	N/A
N/A	N/A	PPAS0A06480	N/A	N/A	194	N/A	N/A	N/A	N/A	N/A	N	N	N/A	N/A	N	N/A	N/A	N/A	N/A	N/A	N/A	N/A	N/A	N/A	N/A	N/A	N/A	N/A	N/A	N/A	N/A	N	N/A	N/A	N/A
N/A	N/A	PPAS0A06530	N/A	N/A	195	N/A	N/A	N/A	N/A	N/A	N	N	N/A	N/A	N	N/A	N/A	N/A	N/A	N/A	N/A	N/A	-3.23021	yes	0.265864	no	N/A	N/A	N/A	N/A	N/A	N	N/A	N/A	N/A
N/A	N/A	PPAS0A06540	N/A	N/A	196	N/A	N/A	N/A	N/A	N/A	N	N	N/A	N/A	N	N/A	N/A	N/A	N/A	N/A	N/A	N/A	3.10624	yes	0.203033	no	N/A	N/A	N/A	N/A	N/A	N	N/A	N/A	N/A
N/A	N/A	PPAS0A06590	N/A	N/A	197	N/A	N/A	N/A	N/A	N/A	Y	N	N/A	N/A	N	N/A	N/A	N/A	N/A	N/A	N/A	N/A	0.655395	no	-0.204614	no	N/A	N/A	N/A	N/A	N/A	Y	N/A	N/A	N/A
N/A	N/A	PPAS0A06630	N/A	N/A	198	N/A	N/A	N/A	N/A	N/A	N	N	N/A	N/A	N	N/A	N/A	N/A	N/A	N/A	N/A	N/A	2.41581	yes	0.0508344	no	N/A	N/A	N/A	N/A	N/A	N	N/A	N/A	N/A
N/A	N/A	PPAS0A06650	N/A	N/A	199	N/A	N/A	N/A	N/A	N/A	N	N	N/A	N/A	N	N/A	N/A	N/A	N/A	N/A	N/A	N/A	N/A	N/A	N/A	N/A	N/A	N/A	N/A	N/A	N/A	N	N/A	N/A	N/A
N/A	N/A	PPAS0A06710	N/A	N/A	200	N/A	N/A	N/A	N/A	N/A	N	N	N/A	N/A	N	N/A	N/A	N/A	N/A	N/A	N/A	N/A	-1.48471	no	0.382467	no	N/A	N/A	N/A	N/A	N/A	N	N/A	N/A	N/A
N/A	N/A	PPAS0A06730	N/A	N/A	201	N/A	N/A	N/A	N/A	N/A	N	N	N/A	N/A	N	N/A	N/A	N/A	N/A	N/A	N/A	N/A	N/A	N/A	N/A	N/A	N/A	N/A	N/A	N/A	N/A	N	N/A	N/A	N/A
N/A	N/A	PPAS0A06740	N/A	N/A	202	N/A	N/A	N/A	N/A	N/A	Y	N	N/A	N/A	N	N/A	N/A	N/A	N/A	N/A	N/A	N/A	1.90653	no	0.116481	no	N/A	N/A	N/A	N/A	N/A	Y	N/A	N/A	N/A
N/A	N/A	PPAS0A06760	N/A	N/A	203	N/A	N/A	N/A	N/A	N/A	Y	N	N/A	N/A	N	N/A	N/A	N/A	N/A	N/A	N/A	N/A	-3.61419	yes	-0.0155016	no	N/A	N/A	N/A	N/A	N/A	Y	N/A	N/A	N/A
N/A	N/A	PPAS0A06820	N/A	N/A	204	N/A	N/A	N/A	N/A	N/A	N	N	N/A	N/A	N	N/A	N/A	N/A	N/A	N/A	N/A	N/A	0.187004	no	0.00870389	no	N/A	N/A	N/A	N/A	N/A	N	N/A	N/A	N/A
N/A	N/A	PPAS0A06870	N/A	N/A	205	N/A	N/A	N/A	N/A	N/A	N	N	N/A	N/A	N	N/A	N/A	N/A	N/A	N/A	N/A	N/A	N/A	N/A	N/A	N/A	N/A	N/A	N/A	N/A	N/A	N	N/A	N/A	N/A
N/A	N/A	PPAS0A06900	N/A	N/A	206	N/A	N/A	N/A	N/A	N/A	N	N	N/A	N/A	N	N/A	N/A	N/A	N/A	N/A	N/A	N/A	N/A	N/A	N/A	N/A	N/A	N/A	N/A	N/A	N/A	Y	N/A	N/A	N/A
N/A	N/A	PPAS0A06920	N/A	N/A	207	N/A	N/A	N/A	N/A	N/A	Y	N	N/A	N/A	N	N/A	N/A	N/A	N/A	N/A	N/A	N/A	1.40694	yes	-0.559054	no	N/A	N/A	N/A	N/A	N/A	N	N/A	N/A	N/A
N/A	N/A	PPAS0A06930	N/A	N/A	208	N/A	N/A	N/A	N/A	N/A	N	N	N/A	N/A	N	N/A	N/A	N/A	N/A	N/A	N/A	N/A	1.40694	yes	-0.559054	no	N/A	N/A	N/A	N/A	N/A	N	N/A	N/A	N/A
N/A	N/A	PPAS0A06950	N/A	N/A	209	N/A	N/A	N/A	N/A	N/A	N	N	N/A	N/A	N	N/A	N/A	N/A	N/A	N/A	N/A	N/A	-1.17229	yes	0.0685415	no	N/A	N/A	N/A	N/A	N/A	N	N/A	N/A	N/A
N/A	N/A	PPAS0A06970	N/A	N/A	210	N/A	N/A	N/A	N/A	N/A	N	N	N/A	N/A	N	N/A	N/A	N/A	N/A	N/A	N/A	N/A	-0.363813	no	0.0772488	no	N/A	N/A	N/A	N/A	N/A	N	N/A	N/A	N/A
N/A	N/A	PPAS0A06980	N/A	N/A	211	N/A	N/A	N/A	N/A	N/A	N	N	N/A	N/A	N	N/A	N/A	N/A	N/A	N/A	N/A	N/A	-0.363813	no	0.0772488	no	N/A	N/A	N/A	N/A	N/A	N	N/A	N/A	N/A
N/A	N/A	PPAS0A07020	N/A	N/A	212	N/A	N/A	N/A	N/A	N/A	Y	N	N/A	N/A	N	N/A	N/A	N/A	N/A	N/A	N/A	N/A	0.424571	no	-0.105512	no	N/A	N/A	N/A	N/A	N/A	Y	N/A	N/A	N/A
N/A	N/A	PPAS0A07040	N/A	N/A	213	N/A	N/A	N/A	N/A	N/A	Y	N	N/A	N/A	N	N/A	N/A	N/A	N/A	N/A	N/A	N/A	0	no	0	no	N/A	N/A	N/A	N/A	N/A	N	N/A	N/A	N/A
N/A	N/A	PPAS0A07090	N/A	N/A	214	N/A	N/A	N/A	N/A	N/A	Y	N	N/A	N/A	N	N/A	N/A	N/A	N/A	N/A	N/A	N/A	0	no	0	no	N/A	N/A	N/A	N/A	N/A	N	N/A	N/A	N/A
N/A	N/A	PPAS0A07130	N/A	N/A	215	N/A	N/A	N/A	N/A	N/A	N	N	N/A	N/A	N	N/A	N/A	N/A	N/A	N/A	N/A	N/A	-0.145493	no	0.0555168	no	N/A	N/A	N/A	N/A	N/A	N	N/A	N/A	N/A
N/A	N/A	PPAS0A07140	N/A	N/A	216	N/A	N/A	N/A	N/A	N/A	N	N	N/A	N/A	N	N/A	N/A	N/A	N/A	N/A	N/A	N/A	-0.145493	no	0.0555168	no	N/A	N/A	N/A	N/A	N/A	N	N/A	N/A	N/A
N/A	N/A	PPAS0A07150	N/A	N/A	217	N/A	N/A	N/A	N/A	N/A	N	N	N/A	N/A	N	N/A	N/A	N/A	N/A	N/A	N/A	N/A	4.47928	yes	0	no	N/A	N/A	N/A	N/A	N/A	N	N/A	N/A	N/A
N/A	N/A	PPAS0A07160	N/A	N/A	218	N/A	N/A	N/A	N/A	N/A	Y	N	N/A	N/A	N	N/A	N/A	N/A	N/A	N/A	N/A	N/A	-0.152142	no	0	no	N/A	N/A	N/A	N/A	N/A	N	N/A	N/A	N/A
N/A	N/A	PPAS0A07190	N/A	N/A	219	N/A	N/A	N/A	N/A	N/A	Y	N	N/A	N/A	N	N/A	N/A	N/A	N/A	N/A	N/A	N/A	-1.56739	yes	-0.408474	no	N/A	N/A	N/A	N/A	N/A	N	N/A	N/A	N/A
N/A	N/A	PPAS0A07220	N/A	N/A	220	N/A	N/A	N/A	N/A	N/A	N	N	N/A	N/A	N	N/A	N/A	N/A	N/A	N/A	N/A	N/A	1.53854	yes	0.114607	no	N/A	N/A	N/A	N/A	N/A	N	N/A	N/A	N/A
N/A	N/A	PPAS0A07250	N/A	N/A	221	N/A	N/A	N/A	N/A	N/A	N	N	N/A	N/A	N	N/A	N/A	N/A	N/A	N/A	N/A	N/A	1.74768	yes	-0.361534	no	N/A	N/A	N/A	N/A	N/A	Y	N/A	N/A	N/A
N/A	N/A	PPAS0A07300	N/A	N/A	222	N/A	N/A	N/A	N/A	N/A	Y	N	N/A	N/A	N	N/A	N/A	N/A	N/A	N/A	N/A	N/A	-0.897909	yes	0.0415088	no	N/A	N/A	N/A	N/A	N/A	Y	N/A	N/A	N/A
N/A	N/A	PPAS0A07360	N/A	N/A	223	N/A	N/A	N/A	N/A	N/A	Y	N	N/A	N/A	N	N/A	N/A	N/A	N/A	N/A	N/A	N/A	N/A	N/A	N/A	N/A	N/A	N/A	N/A	N/A	N/A	Y	N/A	N/A	N/A
N/A	N/A	PPAS0A07380	N/A	N/A	224	N/A	N/A	N/A	N/A	N/A	N	N	N/A	N/A	N	N/A	N/A	N/A	N/A	N/A	N/A	N/A	N/A	N/A	N/A	N/A	N/A	N/A	N/A	N/A	N/A	N	N/A	N/A	N/A
N/A	N/A	PPAS0A07440	N/A	N/A	225	N/A	N/A	N/A	N/A	N/A	Y	N	N/A	N/A	N	N/A	N/A	N/A	N/A	N/A	N/A	N/A	-2.64831	yes	-0.167273	no	N/A	N/A	N/A	N/A	N/A	Y	N/A	N/A	N/A
N/A	N/A	PPAS0A07450	N/A	N/A	226	N/A	N/A	N/A	N/A	N/A	N	N	N/A	N/A	N	N/A	N/A	N/A	N/A	N/A	N/A	N/A	2.36314	yes	0.142351	no	N/A	N/A	N/A	N/A	N/A	N	N/A	N/A	N/A
N/A	N/A	PPAS0A07510	N/A	N/A	227	N/A	N/A	N/A	N/A	N/A	Y	N	N/A	N/A	N	N/A	N/A	N/A	N/A	N/A	N/A	N/A	0	no	0	no	N/A	N/A	N/A	N/A	N/A	Y	N/A	N/A	N/A
N/A	N/A	PPAS0A07580	N/A	N/A	228	N/A	N/A	N/A	N/A	N/A	N	N	N/A	N/A	N	N/A	N/A	N/A	N/A	N/A	N/A	N/A	-0.663882	no	-0.223527	no	N/A	N/A	N/A	N/A	N/A	N	N/A	N/A	N/A
N/A	N/A	PPAS0A07590	N/A	N/A	229	N/A	N/A	N/A	N/A	N/A	N	N	N/A	N/A	N	N/A	N/A	N/A	N/A	N/A	N/A	N/A	N/A	N/A	N/A	N/A	N/A	N/A	N/A	N/A	N/A	N	N/A	N/A	N/A
N/A	N/A	PPAS0A07600	N/A	N/A	230	N/A	N/A	N/A	N/A	N/A	N	N	N/A	N/A	N	N/A	N/A	N/A	N/A	N/A	N/A	N/A	1.90951	yes	0.174342	no	N/A	N/A	N/A	N/A	N/A	N	N/A	N/A	N/A
N/A	N/A	PPAS0A07650	N/A	N/A	231	N/A	N/A	N/A	N/A	N/A	N	N	N/A	N/A	N	N/A	N/A	N/A	N/A	N/A	N/A	N/A	0.30069	no	0.258605	no	N/A	N/A	N/A	N/A	N/A	N	N/A	N/A	N/A
N/A	N/A	PPAS0A07710	N/A	N/A	232	N/A	N/A	N/A	N/A	N/A	N	N	N/A	N/A	N	N/A	N/A	N/A	N/A	N/A	N/A	N/A	N/A	N/A	N/A	N/A	N/A	N/A	N/A	N/A	N/A	Y	N/A	N/A	N/A
N/A	N/A	PPAS0A07720	N/A	N/A	233	N/A	N/A	N/A	N/A	N/A	Y	N	N/A	N/A	N	N/A	N/A	N/A	N/A	N/A	N/A	N/A	1.98437	yes	-0.63994	yes	N/A	N/A	N/A	N/A	N/A	Y	N/A	N/A	N/A
N/A	N/A	PPAS0A07810	N/A	N/A	234	N/A	N/A	N/A	N/A	N/A	Y	N	N/A	N/A	N	N/A	N/A	N/A	N/A	N/A	N/A	N/A	-0.798814	no	0.233365	no	N/A	N/A	N/A	N/A	N/A	N	N/A	N/A	N/A
N/A	N/A	PPAS0A07830	N/A	N/A	235	N/A	N/A	N/A	N/A	N/A	N	N	N/A	N/A	N	N/A	N/A	N/A	N/A	N/A	N/A	N/A	0.830636	no	-0.241345	no	N/A	N/A	N/A	N/A	N/A	N	N/A	N/A	N/A
N/A	N/A	PPAS0A07900	N/A	N/A	236	N/A	N/A	N/A	N/A	N/A	N	N	N/A	N/A	N	N/A	N/A	N/A	N/A	N/A	N/A	N/A	2.61827	yes	-0.012726	no	N/A	N/A	N/A	N/A	N/A	N	N/A	N/A	N/A
N/A	N/A	PPAS0A07910	N/A	N/A	237	N/A	N/A	N/A	N/A	N/A	N	N	N/A	N/A	N	N/A	N/A	N/A	N/A	N/A	N/A	N/A	-0.215026	no	0.0926096	no	N/A	N/A	N/A	N/A	N/A	N	N/A	N/A	N/A
N/A	N/A	PPAS0A07920	N/A	N/A	238	N/A	N/A	N/A	N/A	N/A	N	N	N/A	N/A	N	N/A	N/A	N/A	N/A	N/A	N/A	N/A	0.0318866	no	0.296714	no	N/A	N/A	N/A	N/A	N/A	N	N/A	N/A	N/A
N/A	N/A	PPAS0A07930	N/A	N/A	239	N/A	N/A	N/A	N/A	N/A	Y	N	N/A	N/A	N	N/A	N/A	N/A	N/A	N/A	N/A	N/A	N/A	N/A	N/A	N/A	N/A	N/A	N/A	N/A	N/A	Y	N/A	N/A	N/A
N/A	N/A	PPAS0A07940	N/A	N/A	240	N/A	N/A	N/A	N/A	N/A	Y	N	N/A	N/A	N	N/A	N/A	N/A	N/A	N/A	N/A	N/A	0.42692	no	-0.000986649	no	N/A	N/A	N/A	N/A	N/A	Y	N/A	N/A	N/A
N/A	N/A	PPAS0A07980	N/A	N/A	241	N/A	N/A	N/A	N/A	N/A	Y	N	N/A	N/A	N	N/A	N/A	N/A	N/A	N/A	N/A	N/A	-0.372242	no	-0.176325	no	N/A	N/A	N/A	N/A	N/A	Y	N/A	N/A	N/A
N/A	N/A	PPAS0A07990	N/A	N/A	242	N/A	N/A	N/A	N/A	N/A	Y	N	N/A	N/A	N	N/A	N/A	N/A	N/A	N/A	N/A	N/A	-1.67262	no	-0.39917	no	N/A	N/A	N/A	N/A	N/A	Y	N/A	N/A	N/A
N/A	N/A	PPAS0A08000	N/A	N/A	243	N/A	N/A	N/A	N/A	N/A	Y	N	N/A	N/A	N	N/A	N/A	N/A	N/A	N/A	N/A	N/A	-1.67262	no	-0.39917	no	N/A	N/A	N/A	N/A	N/A	Y	N/A	N/A	N/A
N/A	N/A	PPAS0A08030	N/A	N/A	244	N/A	N/A	N/A	N/A	N/A	Y	N	N/A	N/A	N	N/A	N/A	N/A	N/A	N/A	N/A	N/A	-1.41723	no	0.0636983	no	N/A	N/A	N/A	N/A	N/A	Y	N/A	N/A	N/A
N/A	N/A	PPAS0A08040	N/A	N/A	245	N/A	N/A	N/A	N/A	N/A	N	N	N/A	N/A	N	N/A	N/A	N/A	N/A	N/A	N/A	N/A	-1.41723	no	0.0636983	no	N/A	N/A	N/A	N/A	N/A	N	N/A	N/A	N/A
N/A	N/A	PPAS0A08080	N/A	N/A	246	N/A	N/A	N/A	N/A	N/A	Y	N	N/A	N/A	N	N/A	N/A	N/A	N/A	N/A	N/A	N/A	0.31258	no	0.0549121	no	N/A	N/A	N/A	N/A	N/A	N	N/A	N/A	N/A
N/A	N/A	PPAS0A08140	N/A	N/A	247	N/A	N/A	N/A	N/A	N/A	N	N	N/A	N/A	N	N/A	N/A	N/A	N/A	N/A	N/A	N/A	-1.49543	no	0.309922	no	N/A	N/A	N/A	N/A	N/A	N	N/A	N/A	N/A
N/A	N/A	PPAS0A08160	N/A	N/A	248	N/A	N/A	N/A	N/A	N/A	N	N	N/A	N/A	N	N/A	N/A	N/A	N/A	N/A	N/A	N/A	-2.51771	yes	-0.0606686	no	N/A	N/A	N/A	N/A	N/A	N	N/A	N/A	N/A
N/A	N/A	PPAS0A08220	N/A	N/A	249	N/A	N/A	N/A	N/A	N/A	N	N	N/A	N/A	N	N/A	N/A	N/A	N/A	N/A	N/A	N/A	0.198017	no	0.222746	no	N/A	N/A	N/A	N/A	N/A	N	N/A	N/A	N/A
N/A	N/A	PPAS0A08250	N/A	N/A	250	N/A	N/A	N/A	N/A	N/A	Y	N	N/A	N/A	N	N/A	N/A	N/A	N/A	N/A	N/A	N/A	0.225079	no	-0.0938146	no	N/A	N/A	N/A	N/A	N/A	N	N/A	N/A	N/A
N/A	N/A	PPAS0A08260	N/A	N/A	251	N/A	N/A	N/A	N/A	N/A	Y	N	N/A	N/A	N	N/A	N/A	N/A	N/A	N/A	N/A	N/A	0.837311	no	-0.596821	no	N/A	N/A	N/A	N/A	N/A	N	N/A	N/A	N/A
N/A	N/A	PPAS0A08270	N/A	N/A	252	N/A	N/A	N/A	N/A	N/A	N	N	N/A	N/A	N	N/A	N/A	N/A	N/A	N/A	N/A	N/A	1.62554	no	-0.20311	no	N/A	N/A	N/A	N/A	N/A	N	N/A	N/A	N/A
N/A	N/A	PPAS0A08280	N/A	N/A	253	N/A	N/A	N/A	N/A	N/A	N	N	N/A	N/A	N	N/A	N/A	N/A	N/A	N/A	N/A	N/A	1.62554	no	-0.20311	no	N/A	N/A	N/A	N/A	N/A	N	N/A	N/A	N/A
N/A	N/A	PPAS0A08380	N/A	N/A	254	N/A	N/A	N/A	N/A	N/A	Y	N	N/A	N/A	N	N/A	N/A	N/A	N/A	N/A	N/A	N/A	N/A	N/A	N/A	N/A	N/A	N/A	N/A	N/A	N/A	N	N/A	N/A	N/A
N/A	N/A	PPAS0A08390	N/A	N/A	255	N/A	N/A	N/A	N/A	N/A	N	N	N/A	N/A	N	N/A	N/A	N/A	N/A	N/A	N/A	N/A	-0.255336	no	0.222047	no	N/A	N/A	N/A	N/A	N/A	Y	N/A	N/A	N/A
N/A	N/A	PPAS0A08400	N/A	N/A	256	N/A	N/A	N/A	N/A	N/A	N	N	N/A	N/A	N	N/A	N/A	N/A	N/A	N/A	N/A	N/A	N/A	N/A	N/A	N/A	N/A	N/A	N/A	N/A	N/A	Y	N/A	N/A	N/A
N/A	N/A	PPAS0A08420	N/A	N/A	257	N/A	N/A	N/A	N/A	N/A	N	N	N/A	N/A	N	N/A	N/A	N/A	N/A	N/A	N/A	N/A	1.68904	yes	-0.901169	yes	N/A	N/A	N/A	N/A	N/A	Y	N/A	N/A	N/A
N/A	N/A	PPAS0A08540	N/A	N/A	258	N/A	N/A	N/A	N/A	N/A	Y	N	N/A	N/A	N	N/A	N/A	N/A	N/A	N/A	N/A	N/A	1.21337	yes	0.00252062	no	N/A	N/A	N/A	N/A	N/A	Y	N/A	N/A	N/A
N/A	N/A	PPAS0A08660	N/A	N/A	259	N/A	N/A	N/A	N/A	N/A	N	N	N/A	N/A	N	N/A	N/A	N/A	N/A	N/A	N/A	N/A	-1.07036	no	0.183742	no	N/A	N/A	N/A	N/A	N/A	N	N/A	N/A	N/A
N/A	N/A	PPAS0A08760	N/A	N/A	260	N/A	N/A	N/A	N/A	N/A	N	N	N/A	N/A	N	N/A	N/A	N/A	N/A	N/A	N/A	N/A	1.20793	yes	-0.696521	no	N/A	N/A	N/A	N/A	N/A	N	N/A	N/A	N/A
N/A	N/A	PPAS0A08770	N/A	N/A	261	N/A	N/A	N/A	N/A	N/A	N	N	N/A	N/A	N	N/A	N/A	N/A	N/A	N/A	N/A	N/A	1.20793	yes	-0.696521	no	N/A	N/A	N/A	N/A	N/A	N	N/A	N/A	N/A
N/A	N/A	PPAS0A08790	N/A	N/A	262	N/A	N/A	N/A	N/A	N/A	N	N	N/A	N/A	N	N/A	N/A	N/A	N/A	N/A	N/A	N/A	0.149458	no	-0.319581	no	N/A	N/A	N/A	N/A	N/A	N	N/A	N/A	N/A
N/A	N/A	PPAS0A08810	N/A	N/A	263	N/A	N/A	N/A	N/A	N/A	N	N	N/A	N/A	N	N/A	N/A	N/A	N/A	N/A	N/A	N/A	2.02765	no	0.173908	no	N/A	N/A	N/A	N/A	N/A	Y	N/A	N/A	N/A
N/A	N/A	PPAS0A08820	N/A	N/A	264	N/A	N/A	N/A	N/A	N/A	N	N	N/A	N/A	N	N/A	N/A	N/A	N/A	N/A	N/A	N/A	1.62469	yes	-0.0232617	no	N/A	N/A	N/A	N/A	N/A	Y	N/A	N/A	N/A
N/A	N/A	PPAS0A08830	N/A	N/A	265	N/A	N/A	N/A	N/A	N/A	N	N	N/A	N/A	N	N/A	N/A	N/A	N/A	N/A	N/A	N/A	1.57105	yes	-0.926152	yes	N/A	N/A	N/A	N/A	N/A	Y	N/A	N/A	N/A
N/A	N/A	PPAS0A08890	N/A	N/A	266	N/A	N/A	N/A	N/A	N/A	N	N	N/A	N/A	N	N/A	N/A	N/A	N/A	N/A	N/A	N/A	-1.20475	yes	0.0976057	no	N/A	N/A	N/A	N/A	N/A	N	N/A	N/A	N/A
N/A	N/A	PPAS0A08910	N/A	N/A	267	N/A	N/A	N/A	N/A	N/A	Y	N	N/A	N/A	N	N/A	N/A	N/A	N/A	N/A	N/A	N/A	-2.91096	yes	0.0145346	no	N/A	N/A	N/A	N/A	N/A	Y	N/A	N/A	N/A
N/A	N/A	PPAS0A08920	N/A	N/A	268	N/A	N/A	N/A	N/A	N/A	Y	N	N/A	N/A	N	N/A	N/A	N/A	N/A	N/A	N/A	N/A	0.0054956	no	0.089292	no	N/A	N/A	N/A	N/A	N/A	Y	N/A	N/A	N/A
N/A	N/A	PPAS0A08940	N/A	N/A	269	N/A	N/A	N/A	N/A	N/A	N	N	N/A	N/A	N	N/A	N/A	N/A	N/A	N/A	N/A	N/A	0.0054956	no	0.089292	no	N/A	N/A	N/A	N/A	N/A	N	N/A	N/A	N/A
N/A	N/A	PPAS0A08960	N/A	N/A	270	N/A	N/A	N/A	N/A	N/A	N	N	N/A	N/A	N	N/A	N/A	N/A	N/A	N/A	N/A	N/A	N/A	N/A	N/A	N/A	N/A	N/A	N/A	N/A	N/A	Y	N/A	N/A	N/A
N/A	N/A	PPAS0A08970	N/A	N/A	271	N/A	N/A	N/A	N/A	N/A	N	N	N/A	N/A	N	N/A	N/A	N/A	N/A	N/A	N/A	N/A	N/A	N/A	N/A	N/A	N/A	N/A	N/A	N/A	N/A	Y	N/A	N/A	N/A
N/A	N/A	PPAS0A09060	N/A	N/A	272	N/A	N/A	N/A	N/A	N/A	Y	N	N/A	N/A	N	N/A	N/A	N/A	N/A	N/A	N/A	N/A	2.6633	yes	0.274839	no	N/A	N/A	N/A	N/A	N/A	Y	N/A	N/A	N/A
N/A	N/A	PPAS0A09110	N/A	N/A	273	N/A	N/A	N/A	N/A	N/A	N	N	N/A	N/A	N	N/A	N/A	N/A	N/A	N/A	N/A	N/A	-0.227012	no	-0.0237764	no	N/A	N/A	N/A	N/A	N/A	N	N/A	N/A	N/A
N/A	N/A	PPAS0A09140	N/A	N/A	274	N/A	N/A	N/A	N/A	N/A	N	N	N/A	N/A	N	N/A	N/A	N/A	N/A	N/A	N/A	N/A	-0.227012	no	-0.0237764	no	N/A	N/A	N/A	N/A	N/A	N	N/A	N/A	N/A
N/A	N/A	PPAS0A09150	N/A	N/A	275	N/A	N/A	N/A	N/A	N/A	N	N	N/A	N/A	N	N/A	N/A	N/A	N/A	N/A	N/A	N/A	-0.227012	no	-0.0237764	no	N/A	N/A	N/A	N/A	N/A	N	N/A	N/A	N/A
N/A	N/A	PPAS0A09180	N/A	N/A	276	N/A	N/A	N/A	N/A	N/A	N	N	N/A	N/A	N	N/A	N/A	N/A	N/A	N/A	N/A	N/A	-1.60469	no	0.0219805	no	N/A	N/A	N/A	N/A	N/A	N	N/A	N/A	N/A
N/A	N/A	PPAS0A09210	N/A	N/A	277	N/A	N/A	N/A	N/A	N/A	N	N	N/A	N/A	N	N/A	N/A	N/A	N/A	N/A	N/A	N/A	N/A	N/A	N/A	N/A	N/A	N/A	N/A	N/A	N/A	N	N/A	N/A	N/A
N/A	N/A	PPAS0A09220	N/A	N/A	278	N/A	N/A	N/A	N/A	N/A	N	N	N/A	N/A	N	N/A	N/A	N/A	N/A	N/A	N/A	N/A	N/A	N/A	N/A	N/A	N/A	N/A	N/A	N/A	N/A	N	N/A	N/A	N/A
N/A	N/A	PPAS0A09260	N/A	N/A	279	N/A	N/A	N/A	N/A	N/A	N	N	N/A	N/A	N	N/A	N/A	N/A	N/A	N/A	N/A	N/A	2.83413	yes	-0.810502	no	N/A	N/A	N/A	N/A	N/A	N	N/A	N/A	N/A
N/A	N/A	PPAS0A09300	N/A	N/A	280	N/A	N/A	N/A	N/A	N/A	Y	N	N/A	N/A	N	N/A	N/A	N/A	N/A	N/A	N/A	N/A	N/A	N/A	N/A	N/A	N/A	N/A	N/A	N/A	N/A	Y	N/A	N/A	N/A
N/A	N/A	PPAS0A09310	N/A	N/A	281	N/A	N/A	N/A	N/A	N/A	Y	N	N/A	N/A	N	N/A	N/A	N/A	N/A	N/A	N/A	N/A	1.04235	no	0.143128	no	N/A	N/A	N/A	N/A	N/A	Y	N/A	N/A	N/A
N/A	N/A	PPAS0A09360	N/A	N/A	282	N/A	N/A	N/A	N/A	N/A	N	N	N/A	N/A	N	N/A	N/A	N/A	N/A	N/A	N/A	N/A	-0.648348	no	0.050277	no	N/A	N/A	N/A	N/A	N/A	N	N/A	N/A	N/A
N/A	N/A	PPAS0A09420	N/A	N/A	283	N/A	N/A	N/A	N/A	N/A	N	N	N/A	N/A	N	N/A	N/A	N/A	N/A	N/A	N/A	N/A	N/A	N/A	N/A	N/A	N/A	N/A	N/A	N/A	N/A	Y	N/A	N/A	N/A
N/A	N/A	PPAS0A09430	N/A	N/A	284	N/A	N/A	N/A	N/A	N/A	N	N	N/A	N/A	N	N/A	N/A	N/A	N/A	N/A	N/A	N/A	1.23836	no	0.286082	no	N/A	N/A	N/A	N/A	N/A	Y	N/A	N/A	N/A
N/A	N/A	PPAS0A09470	N/A	N/A	285	N/A	N/A	N/A	N/A	N/A	Y	N	N/A	N/A	N	N/A	N/A	N/A	N/A	N/A	N/A	N/A	1.17211	yes	0.110725	no	N/A	N/A	N/A	N/A	N/A	N	N/A	N/A	N/A
N/A	N/A	PPAS0A09480	N/A	N/A	286	N/A	N/A	N/A	N/A	N/A	Y	N	N/A	N/A	N	N/A	N/A	N/A	N/A	N/A	N/A	N/A	0.188648	no	-0.0133102	no	N/A	N/A	N/A	N/A	N/A	N	N/A	N/A	N/A
N/A	N/A	PPAS0A09530	N/A	N/A	287	N/A	N/A	N/A	N/A	N/A	Y	N	N/A	N/A	N	N/A	N/A	N/A	N/A	N/A	N/A	N/A	-0.330521	no	0.341845	no	N/A	N/A	N/A	N/A	N/A	Y	N/A	N/A	N/A
N/A	N/A	PPAS0A09610	N/A	N/A	288	N/A	N/A	N/A	N/A	N/A	N	N	N/A	N/A	N	N/A	N/A	N/A	N/A	N/A	N/A	N/A	0.106642	no	0.160512	no	N/A	N/A	N/A	N/A	N/A	N	N/A	N/A	N/A
N/A	N/A	PPAS0A09680	N/A	N/A	289	N/A	N/A	N/A	N/A	N/A	Y	N	N/A	N/A	N	N/A	N/A	N/A	N/A	N/A	N/A	N/A	-1.6069	yes	0.325584	no	N/A	N/A	N/A	N/A	N/A	N	N/A	N/A	N/A
N/A	N/A	PPAS0A09720	N/A	N/A	290	N/A	N/A	N/A	N/A	N/A	N	N	N/A	N/A	N	N/A	N/A	N/A	N/A	N/A	N/A	N/A	N/A	N/A	N/A	N/A	N/A	N/A	N/A	N/A	N/A	N	N/A	N/A	N/A
N/A	N/A	PPAS0A09770	N/A	N/A	291	N/A	N/A	N/A	N/A	N/A	N	N	N/A	N/A	N	N/A	N/A	N/A	N/A	N/A	N/A	N/A	N/A	N/A	N/A	N/A	N/A	N/A	N/A	N/A	N/A	Y	N/A	N/A	N/A
N/A	N/A	PPAS0A09790	N/A	N/A	292	N/A	N/A	N/A	N/A	N/A	N	N	N/A	N/A	N	N/A	N/A	N/A	N/A	N/A	N/A	N/A	N/A	N/A	N/A	N/A	N/A	N/A	N/A	N/A	N/A	Y	N/A	N/A	N/A
N/A	N/A	PPAS0A09830	N/A	N/A	293	N/A	N/A	N/A	N/A	N/A	N	N	N/A	N/A	N	N/A	N/A	N/A	N/A	N/A	N/A	N/A	N/A	N/A	N/A	N/A	N/A	N/A	N/A	N/A	N/A	Y	N/A	N/A	N/A
N/A	N/A	PPAS0A09840	N/A	N/A	294	N/A	N/A	N/A	N/A	N/A	N	N	N/A	N/A	N	N/A	N/A	N/A	N/A	N/A	N/A	N/A	0.0581211	no	-0.0145809	no	N/A	N/A	N/A	N/A	N/A	Y	N/A	N/A	N/A
N/A	N/A	PPAS0A09950	N/A	N/A	295	N/A	N/A	N/A	N/A	N/A	N	N	N/A	N/A	N	N/A	N/A	N/A	N/A	N/A	N/A	N/A	-0.932504	yes	0.419536	no	N/A	N/A	N/A	N/A	N/A	N	N/A	N/A	N/A
N/A	N/A	PPAS0A09960	N/A	N/A	296	N/A	N/A	N/A	N/A	N/A	N	N	N/A	N/A	N	N/A	N/A	N/A	N/A	N/A	N/A	N/A	-1.0063	no	0.114982	no	N/A	N/A	N/A	N/A	N/A	N	N/A	N/A	N/A
N/A	N/A	PPAS0A09970	N/A	N/A	297	N/A	N/A	N/A	N/A	N/A	N	N	N/A	N/A	N	N/A	N/A	N/A	N/A	N/A	N/A	N/A	0.387011	no	-0.0631765	no	N/A	N/A	N/A	N/A	N/A	N	N/A	N/A	N/A
N/A	N/A	PPAS0A09990	N/A	N/A	298	N/A	N/A	N/A	N/A	N/A	N	N	N/A	N/A	N	N/A	N/A	N/A	N/A	N/A	N/A	N/A	0.387011	no	-0.0631765	no	N/A	N/A	N/A	N/A	N/A	N	N/A	N/A	N/A
N/A	N/A	PPAS0A10040	N/A	N/A	299	N/A	N/A	N/A	N/A	N/A	N	N	N/A	N/A	N	N/A	N/A	N/A	N/A	N/A	N/A	N/A	-0.596413	no	0.148272	no	N/A	N/A	N/A	N/A	N/A	N	N/A	N/A	N/A
N/A	N/A	PPAS0A10070	N/A	N/A	300	N/A	N/A	N/A	N/A	N/A	N	N	N/A	N/A	N	N/A	N/A	N/A	N/A	N/A	N/A	N/A	0.778205	yes	-0.112207	no	N/A	N/A	N/A	N/A	N/A	Y	N/A	N/A	N/A
N/A	N/A	PPAS0A10080	N/A	N/A	301	N/A	N/A	N/A	N/A	N/A	N	N	N/A	N/A	N	N/A	N/A	N/A	N/A	N/A	N/A	N/A	1.57064	yes	-0.263062	no	N/A	N/A	N/A	N/A	N/A	Y	N/A	N/A	N/A
N/A	N/A	PPAS0A10100	N/A	N/A	302	N/A	N/A	N/A	N/A	N/A	Y	N	N/A	N/A	N	N/A	N/A	N/A	N/A	N/A	N/A	N/A	2.86175	yes	0.494557	no	N/A	N/A	N/A	N/A	N/A	Y	N/A	N/A	N/A
N/A	N/A	PPAS0A10130	N/A	N/A	303	N/A	N/A	N/A	N/A	N/A	N	N	N/A	N/A	N	N/A	N/A	N/A	N/A	N/A	N/A	N/A	-1.10777	yes	0.451415	no	N/A	N/A	N/A	N/A	N/A	N	N/A	N/A	N/A
N/A	N/A	PPAS0A10160	N/A	N/A	304	N/A	N/A	N/A	N/A	N/A	N	N	N/A	N/A	N	N/A	N/A	N/A	N/A	N/A	N/A	N/A	3.58058	yes	-4.3238	yes	N/A	N/A	N/A	N/A	N/A	N	N/A	N/A	N/A
N/A	N/A	PPAS0A10170	N/A	N/A	305	N/A	N/A	N/A	N/A	N/A	Y	N	N/A	N/A	N	N/A	N/A	N/A	N/A	N/A	N/A	N/A	3.58058	yes	-4.3238	yes	N/A	N/A	N/A	N/A	N/A	Y	N/A	N/A	N/A
N/A	N/A	PPAS0A10210	N/A	N/A	306	N/A	N/A	N/A	N/A	N/A	N	N	N/A	N/A	N	N/A	N/A	N/A	N/A	N/A	N/A	N/A	N/A	N/A	N/A	N/A	N/A	N/A	N/A	N/A	N/A	N	N/A	N/A	N/A
N/A	N/A	PPAS0A10250	N/A	N/A	307	N/A	N/A	N/A	N/A	N/A	N	N	N/A	N/A	N	N/A	N/A	N/A	N/A	N/A	N/A	N/A	-2.08873	yes	0.398856	no	N/A	N/A	N/A	N/A	N/A	N	N/A	N/A	N/A
N/A	N/A	PPAS0A10280	N/A	N/A	308	N/A	N/A	N/A	N/A	N/A	N	N	N/A	N/A	N	N/A	N/A	N/A	N/A	N/A	N/A	N/A	-0.454998	no	0.423209	no	N/A	N/A	N/A	N/A	N/A	N	N/A	N/A	N/A
N/A	N/A	PPAS0A10290	N/A	N/A	309	N/A	N/A	N/A	N/A	N/A	N	N	N/A	N/A	N	N/A	N/A	N/A	N/A	N/A	N/A	N/A	-1.9962	yes	0.194802	no	N/A	N/A	N/A	N/A	N/A	N	N/A	N/A	N/A
N/A	N/A	PPAS0A10370	N/A	N/A	310	N/A	N/A	N/A	N/A	N/A	N	N	N/A	N/A	N	N/A	N/A	N/A	N/A	N/A	N/A	N/A	1.754	yes	0.0896103	no	N/A	N/A	N/A	N/A	N/A	N	N/A	N/A	N/A
N/A	N/A	PPAS0A10380	N/A	N/A	311	N/A	N/A	N/A	N/A	N/A	N	N	N/A	N/A	N	N/A	N/A	N/A	N/A	N/A	N/A	N/A	0.225164	no	0.110653	no	N/A	N/A	N/A	N/A	N/A	N	N/A	N/A	N/A
N/A	N/A	PPAS0A10390	N/A	N/A	312	N/A	N/A	N/A	N/A	N/A	N	N	N/A	N/A	N	N/A	N/A	N/A	N/A	N/A	N/A	N/A	1.14758	yes	0.31328	no	N/A	N/A	N/A	N/A	N/A	N	N/A	N/A	N/A
N/A	N/A	PPAS0A10450	N/A	N/A	313	N/A	N/A	N/A	N/A	N/A	Y	N	N/A	N/A	N	N/A	N/A	N/A	N/A	N/A	N/A	N/A	0	no	0.211903	no	N/A	N/A	N/A	N/A	N/A	Y	N/A	N/A	N/A
N/A	N/A	PPAS0A10530	N/A	N/A	314	N/A	N/A	N/A	N/A	N/A	Y	N	N/A	N/A	N	N/A	N/A	N/A	N/A	N/A	N/A	N/A	N/A	N/A	N/A	N/A	N/A	N/A	N/A	N/A	N/A	N	N/A	N/A	N/A
N/A	N/A	PPAS0A10540	N/A	N/A	315	N/A	N/A	N/A	N/A	N/A	Y	N	N/A	N/A	N	N/A	N/A	N/A	N/A	N/A	N/A	N/A	N/A	N/A	N/A	N/A	N/A	N/A	N/A	N/A	N/A	N	N/A	N/A	N/A
N/A	N/A	PPAS0A10550	N/A	N/A	316	N/A	N/A	N/A	N/A	N/A	Y	N	N/A	N/A	N	N/A	N/A	N/A	N/A	N/A	N/A	N/A	N/A	N/A	N/A	N/A	N/A	N/A	N/A	N/A	N/A	Y	N/A	N/A	N/A
N/A	N/A	PPAS0A10570	N/A	N/A	317	N/A	N/A	N/A	N/A	N/A	N	N	N/A	N/A	N	N/A	N/A	N/A	N/A	N/A	N/A	N/A	-0.208692	no	0.295547	no	N/A	N/A	N/A	N/A	N/A	N	N/A	N/A	N/A
N/A	N/A	PPAS0A10580	N/A	N/A	318	N/A	N/A	N/A	N/A	N/A	N	N	N/A	N/A	N	N/A	N/A	N/A	N/A	N/A	N/A	N/A	-0.355495	no	0.357281	no	N/A	N/A	N/A	N/A	N/A	N	N/A	N/A	N/A
N/A	N/A	PPAS0A10640	N/A	N/A	319	N/A	N/A	N/A	N/A	N/A	N	N	N/A	N/A	N	N/A	N/A	N/A	N/A	N/A	N/A	N/A	0.58181	no	0.0382344	no	N/A	N/A	N/A	N/A	N/A	N	N/A	N/A	N/A
N/A	N/A	PPAS0A10780	N/A	N/A	320	N/A	N/A	N/A	N/A	N/A	Y	N	N/A	N/A	N	N/A	N/A	N/A	N/A	N/A	N/A	N/A	N/A	N/A	N/A	N/A	N/A	N/A	N/A	N/A	N/A	Y	N/A	N/A	N/A
N/A	N/A	PPAS0A10840	N/A	N/A	321	N/A	N/A	N/A	N/A	N/A	N	N	N/A	N/A	N	N/A	N/A	N/A	N/A	N/A	N/A	N/A	1.65306	yes	0.225013	no	N/A	N/A	N/A	N/A	N/A	N	N/A	N/A	N/A
N/A	N/A	PPAS0A10870	N/A	N/A	322	N/A	N/A	N/A	N/A	N/A	N	N	N/A	N/A	N	N/A	N/A	N/A	N/A	N/A	N/A	N/A	1.7465	no	0.315095	no	N/A	N/A	N/A	N/A	N/A	N	N/A	N/A	N/A
N/A	N/A	PPAS0A10880	N/A	N/A	323	N/A	N/A	N/A	N/A	N/A	Y	N	N/A	N/A	N	N/A	N/A	N/A	N/A	N/A	N/A	N/A	1.96494	yes	-0.0601982	no	N/A	N/A	N/A	N/A	N/A	Y	N/A	N/A	N/A
N/A	N/A	PPAS0A10890	N/A	N/A	324	N/A	N/A	N/A	N/A	N/A	Y	N	N/A	N/A	N	N/A	N/A	N/A	N/A	N/A	N/A	N/A	0.485412	no	0.11941	no	N/A	N/A	N/A	N/A	N/A	Y	N/A	N/A	N/A
N/A	N/A	PPAS0A10900	N/A	N/A	325	N/A	N/A	N/A	N/A	N/A	N	N	N/A	N/A	N	N/A	N/A	N/A	N/A	N/A	N/A	N/A	-0.469614	no	0.420119	no	N/A	N/A	N/A	N/A	N/A	Y	N/A	N/A	N/A
N/A	N/A	PPAS0A10970	N/A	N/A	326	N/A	N/A	N/A	N/A	N/A	Y	N	N/A	N/A	N	N/A	N/A	N/A	N/A	N/A	N/A	N/A	1.41825	yes	0.368376	no	N/A	N/A	N/A	N/A	N/A	N	N/A	N/A	N/A
N/A	N/A	PPAS0A10980	N/A	N/A	327	N/A	N/A	N/A	N/A	N/A	Y	N	N/A	N/A	N	N/A	N/A	N/A	N/A	N/A	N/A	N/A	-1.95316	yes	0.540327	no	N/A	N/A	N/A	N/A	N/A	N	N/A	N/A	N/A
N/A	N/A	PPAS0A11030	N/A	N/A	328	N/A	N/A	N/A	N/A	N/A	N	N	N/A	N/A	N	N/A	N/A	N/A	N/A	N/A	N/A	N/A	0.393286	no	0.205911	no	N/A	N/A	N/A	N/A	N/A	Y	N/A	N/A	N/A
N/A	N/A	PPAS0A11050	N/A	N/A	329	N/A	N/A	N/A	N/A	N/A	N	N	N/A	N/A	N	N/A	N/A	N/A	N/A	N/A	N/A	N/A	4.88458	yes	-4.08252	yes	N/A	N/A	N/A	N/A	N/A	Y	N/A	N/A	N/A
N/A	N/A	PPAS0A11150	N/A	N/A	330	N/A	N/A	N/A	N/A	N/A	N	N	N/A	N/A	N	N/A	N/A	N/A	N/A	N/A	N/A	N/A	0.347349	no	0	no	N/A	N/A	N/A	N/A	N/A	N	N/A	N/A	N/A
N/A	N/A	PPAS0A11190	N/A	N/A	331	N/A	N/A	N/A	N/A	N/A	N	N	N/A	N/A	N	N/A	N/A	N/A	N/A	N/A	N/A	N/A	-2.81359	no	0.752842	no	N/A	N/A	N/A	N/A	N/A	N	N/A	N/A	N/A
N/A	N/A	PPAS0A11220	N/A	N/A	332	N/A	N/A	N/A	N/A	N/A	N	N	N/A	N/A	N	N/A	N/A	N/A	N/A	N/A	N/A	N/A	N/A	N/A	N/A	N/A	N/A	N/A	N/A	N/A	N/A	N	N/A	N/A	N/A
N/A	N/A	PPAS0A11280	N/A	N/A	333	N/A	N/A	N/A	N/A	N/A	Y	N	N/A	N/A	N	N/A	N/A	N/A	N/A	N/A	N/A	N/A	-0.0245157	no	0.146136	no	N/A	N/A	N/A	N/A	N/A	N	N/A	N/A	N/A
N/A	N/A	PPAS0A11290	N/A	N/A	334	N/A	N/A	N/A	N/A	N/A	Y	N	N/A	N/A	N	N/A	N/A	N/A	N/A	N/A	N/A	N/A	1.63072	no	-0.353588	no	N/A	N/A	N/A	N/A	N/A	N	N/A	N/A	N/A
N/A	N/A	PPAS0A11320	N/A	N/A	335	N/A	N/A	N/A	N/A	N/A	N	N	N/A	N/A	N	N/A	N/A	N/A	N/A	N/A	N/A	N/A	-0.748604	no	0.110758	no	N/A	N/A	N/A	N/A	N/A	N	N/A	N/A	N/A
N/A	N/A	PPAS0A11340	N/A	N/A	336	N/A	N/A	N/A	N/A	N/A	N	N	N/A	N/A	N	N/A	N/A	N/A	N/A	N/A	N/A	N/A	-1.17223	no	0.278617	no	N/A	N/A	N/A	N/A	N/A	N	N/A	N/A	N/A
N/A	N/A	PPAS0A11390	N/A	N/A	337	N/A	N/A	N/A	N/A	N/A	N	N	N/A	N/A	N	N/A	N/A	N/A	N/A	N/A	N/A	N/A	6.12876	yes	0.468774	no	N/A	N/A	N/A	N/A	N/A	Y	N/A	N/A	N/A
N/A	N/A	PPAS0A11440	N/A	N/A	338	N/A	N/A	N/A	N/A	N/A	Y	N	N/A	N/A	N	N/A	N/A	N/A	N/A	N/A	N/A	N/A	0.13044	no	-0.666417	yes	N/A	N/A	N/A	N/A	N/A	Y	N/A	N/A	N/A
N/A	N/A	PPAS0A11480	N/A	N/A	339	N/A	N/A	N/A	N/A	N/A	N	N	N/A	N/A	N	N/A	N/A	N/A	N/A	N/A	N/A	N/A	0.954716	yes	0.183205	no	N/A	N/A	N/A	N/A	N/A	N	N/A	N/A	N/A
N/A	N/A	PPAS0A11510	N/A	N/A	340	N/A	N/A	N/A	N/A	N/A	N	N	N/A	N/A	N	N/A	N/A	N/A	N/A	N/A	N/A	N/A	N/A	N/A	N/A	N/A	N/A	N/A	N/A	N/A	N/A	N	N/A	N/A	N/A
N/A	N/A	PPAS0A11520	N/A	N/A	341	N/A	N/A	N/A	N/A	N/A	Y	N	N/A	N/A	N	N/A	N/A	N/A	N/A	N/A	N/A	N/A	N/A	N/A	N/A	N/A	N/A	N/A	N/A	N/A	N/A	N	N/A	N/A	N/A
N/A	N/A	PPAS0A11530	N/A	N/A	342	N/A	N/A	N/A	N/A	N/A	Y	N	N/A	N/A	N	N/A	N/A	N/A	N/A	N/A	N/A	N/A	0.712728	yes	0.0363849	no	N/A	N/A	N/A	N/A	N/A	N	N/A	N/A	N/A
N/A	N/A	PPAS0A11550	N/A	N/A	343	N/A	N/A	N/A	N/A	N/A	Y	N	N/A	N/A	N	N/A	N/A	N/A	N/A	N/A	N/A	N/A	7.2466	yes	-0.0645782	no	N/A	N/A	N/A	N/A	N/A	N	N/A	N/A	N/A
N/A	N/A	PPAS0A11560	N/A	N/A	344	N/A	N/A	N/A	N/A	N/A	Y	N	N/A	N/A	N	N/A	N/A	N/A	N/A	N/A	N/A	N/A	1.50186	no	0.315071	no	N/A	N/A	N/A	N/A	N/A	N	N/A	N/A	N/A
N/A	N/A	PPAS0A11570	N/A	N/A	345	N/A	N/A	N/A	N/A	N/A	N	N	N/A	N/A	N	N/A	N/A	N/A	N/A	N/A	N/A	N/A	-2.09333	yes	0.41176	no	N/A	N/A	N/A	N/A	N/A	N	N/A	N/A	N/A
N/A	N/A	PPAS0A11600	N/A	N/A	346	N/A	N/A	N/A	N/A	N/A	Y	N	N/A	N/A	N	N/A	N/A	N/A	N/A	N/A	N/A	N/A	-0.91715	no	0.214083	no	N/A	N/A	N/A	N/A	N/A	N	N/A	N/A	N/A
N/A	N/A	PPAS0A11620	N/A	N/A	347	N/A	N/A	N/A	N/A	N/A	N	N	N/A	N/A	N	N/A	N/A	N/A	N/A	N/A	N/A	N/A	-1.26729	yes	0.336163	no	N/A	N/A	N/A	N/A	N/A	N	N/A	N/A	N/A
N/A	N/A	PPAS0A11680	N/A	N/A	348	N/A	N/A	N/A	N/A	N/A	N	N	N/A	N/A	N	N/A	N/A	N/A	N/A	N/A	N/A	N/A	N/A	N/A	N/A	N/A	N/A	N/A	N/A	N/A	N/A	N	N/A	N/A	N/A
N/A	N/A	PPAS0A11730	N/A	N/A	349	N/A	N/A	N/A	N/A	N/A	Y	N	N/A	N/A	N	N/A	N/A	N/A	N/A	N/A	N/A	N/A	0.542044	no	-0.112906	no	N/A	N/A	N/A	N/A	N/A	Y	N/A	N/A	N/A
N/A	N/A	PPAS0A11740	N/A	N/A	350	N/A	N/A	N/A	N/A	N/A	Y	N	N/A	N/A	N	N/A	N/A	N/A	N/A	N/A	N/A	N/A	N/A	N/A	N/A	N/A	N/A	N/A	N/A	N/A	N/A	N	N/A	N/A	N/A
N/A	N/A	PPAS0A11800	N/A	N/A	351	N/A	N/A	N/A	N/A	N/A	N	N	N/A	N/A	N	N/A	N/A	N/A	N/A	N/A	N/A	N/A	N/A	N/A	N/A	N/A	N/A	N/A	N/A	N/A	N/A	N	N/A	N/A	N/A
N/A	N/A	PPAS0A11810	N/A	N/A	352	N/A	N/A	N/A	N/A	N/A	N	N	N/A	N/A	N	N/A	N/A	N/A	N/A	N/A	N/A	N/A	-0.27639	no	-0.0996617	no	N/A	N/A	N/A	N/A	N/A	N	N/A	N/A	N/A
N/A	N/A	PPAS0A11850	N/A	N/A	353	N/A	N/A	N/A	N/A	N/A	N	N	N/A	N/A	N	N/A	N/A	N/A	N/A	N/A	N/A	N/A	N/A	N/A	N/A	N/A	N/A	N/A	N/A	N/A	N/A	N	N/A	N/A	N/A
N/A	N/A	PPAS0A11860	N/A	N/A	354	N/A	N/A	N/A	N/A	N/A	N	N	N/A	N/A	N	N/A	N/A	N/A	N/A	N/A	N/A	N/A	-0.0579904	no	-0.0342506	no	N/A	N/A	N/A	N/A	N/A	N	N/A	N/A	N/A
N/A	N/A	PPAS0A11970	N/A	N/A	355	N/A	N/A	N/A	N/A	N/A	Y	N	N/A	N/A	N	N/A	N/A	N/A	N/A	N/A	N/A	N/A	6.84039	yes	-0.582423	no	N/A	N/A	N/A	N/A	N/A	Y	N/A	N/A	N/A
N/A	N/A	PPAS0A11980	N/A	N/A	356	N/A	N/A	N/A	N/A	N/A	N	N	N/A	N/A	N	N/A	N/A	N/A	N/A	N/A	N/A	N/A	N/A	N/A	N/A	N/A	N/A	N/A	N/A	N/A	N/A	Y	N/A	N/A	N/A
N/A	N/A	PPAS0A12020	N/A	N/A	357	N/A	N/A	N/A	N/A	N/A	N	N	N/A	N/A	N	N/A	N/A	N/A	N/A	N/A	N/A	N/A	0.36629	no	-0.0406908	no	N/A	N/A	N/A	N/A	N/A	N	N/A	N/A	N/A
N/A	N/A	PPAS0A12030	N/A	N/A	358	N/A	N/A	N/A	N/A	N/A	N	N	N/A	N/A	N	N/A	N/A	N/A	N/A	N/A	N/A	N/A	0.533823	no	-0.63557	no	N/A	N/A	N/A	N/A	N/A	N	N/A	N/A	N/A
N/A	N/A	PPAS0A12040	N/A	N/A	359	N/A	N/A	N/A	N/A	N/A	N	N	N/A	N/A	N	N/A	N/A	N/A	N/A	N/A	N/A	N/A	0.0173946	no	0.263288	no	N/A	N/A	N/A	N/A	N/A	N	N/A	N/A	N/A
N/A	N/A	PPAS0A12070	N/A	N/A	360	N/A	N/A	N/A	N/A	N/A	N	N	N/A	N/A	N	N/A	N/A	N/A	N/A	N/A	N/A	N/A	2.61338	yes	0.436601	no	N/A	N/A	N/A	N/A	N/A	Y	N/A	N/A	N/A
N/A	N/A	PPAS0A12080	N/A	N/A	361	N/A	N/A	N/A	N/A	N/A	N	N	N/A	N/A	N	N/A	N/A	N/A	N/A	N/A	N/A	N/A	7.23163	yes	-0.650133	no	N/A	N/A	N/A	N/A	N/A	Y	N/A	N/A	N/A
N/A	N/A	PPAS0A12090	N/A	N/A	362	N/A	N/A	N/A	N/A	N/A	N	N	N/A	N/A	N	N/A	N/A	N/A	N/A	N/A	N/A	N/A	1.3	no	-0.419546	no	N/A	N/A	N/A	N/A	N/A	N	N/A	N/A	N/A
N/A	N/A	PPAS0A12120	N/A	N/A	363	N/A	N/A	N/A	N/A	N/A	Y	N	N/A	N/A	N	N/A	N/A	N/A	N/A	N/A	N/A	N/A	0.604442	no	0.0147882	no	N/A	N/A	N/A	N/A	N/A	Y	N/A	N/A	N/A
N/A	N/A	PPAS0A12150	N/A	N/A	364	N/A	N/A	N/A	N/A	N/A	N	N	N/A	N/A	N	N/A	N/A	N/A	N/A	N/A	N/A	N/A	1.49112	no	0.356676	no	N/A	N/A	N/A	N/A	N/A	Y	N/A	N/A	N/A
N/A	N/A	PPAS0A12190	N/A	N/A	365	N/A	N/A	N/A	N/A	N/A	N	N	N/A	N/A	N	N/A	N/A	N/A	N/A	N/A	N/A	N/A	2.04526	yes	0.667361	no	N/A	N/A	N/A	N/A	N/A	N	N/A	N/A	N/A
N/A	N/A	PPAS0A12240	N/A	N/A	366	N/A	N/A	N/A	N/A	N/A	N	N	N/A	N/A	N	N/A	N/A	N/A	N/A	N/A	N/A	N/A	-1.20367	yes	-0.0597133	no	N/A	N/A	N/A	N/A	N/A	N	N/A	N/A	N/A
N/A	N/A	PPAS0A12250	N/A	N/A	367	N/A	N/A	N/A	N/A	N/A	N	N	N/A	N/A	N	N/A	N/A	N/A	N/A	N/A	N/A	N/A	-0.795867	yes	0.0120115	no	N/A	N/A	N/A	N/A	N/A	N	N/A	N/A	N/A
N/A	N/A	PPAS0A12280	N/A	N/A	368	N/A	N/A	N/A	N/A	N/A	N	N	N/A	N/A	N	N/A	N/A	N/A	N/A	N/A	N/A	N/A	-0.528911	no	0.29842	no	N/A	N/A	N/A	N/A	N/A	N	N/A	N/A	N/A
N/A	N/A	PPAS0A12400	N/A	N/A	369	N/A	N/A	N/A	N/A	N/A	N	N	N/A	N/A	N	N/A	N/A	N/A	N/A	N/A	N/A	N/A	5.07958	yes	-3.87169	yes	N/A	N/A	N/A	N/A	N/A	Y	N/A	N/A	N/A
N/A	N/A	PPAS0A12470	N/A	N/A	370	N/A	N/A	N/A	N/A	N/A	Y	N	N/A	N/A	N	N/A	N/A	N/A	N/A	N/A	N/A	N/A	-3.96384	yes	-0.0904455	no	N/A	N/A	N/A	N/A	N/A	N	N/A	N/A	N/A
N/A	N/A	PPAS0A12530	N/A	N/A	371	N/A	N/A	N/A	N/A	N/A	Y	N	N/A	N/A	N	N/A	N/A	N/A	N/A	N/A	N/A	N/A	-1.57189	no	0.219235	no	N/A	N/A	N/A	N/A	N/A	N	N/A	N/A	N/A
N/A	N/A	PPAS0A12560	N/A	N/A	372	N/A	N/A	N/A	N/A	N/A	N	N	N/A	N/A	N	N/A	N/A	N/A	N/A	N/A	N/A	N/A	-1.43356	yes	0.600819	no	N/A	N/A	N/A	N/A	N/A	N	N/A	N/A	N/A
N/A	N/A	PPAS0A12670	N/A	N/A	373	N/A	N/A	N/A	N/A	N/A	N	N	N/A	N/A	N	N/A	N/A	N/A	N/A	N/A	N/A	N/A	-1.07998	yes	0.110203	no	N/A	N/A	N/A	N/A	N/A	N	N/A	N/A	N/A
N/A	N/A	PPAS0A12790	N/A	N/A	374	N/A	N/A	N/A	N/A	N/A	Y	N	N/A	N/A	N	N/A	N/A	N/A	N/A	N/A	N/A	N/A	0.732598	no	-0.257724	no	N/A	N/A	N/A	N/A	N/A	N	N/A	N/A	N/A
N/A	N/A	PPAS0A12820	N/A	N/A	375	N/A	N/A	N/A	N/A	N/A	N	N	N/A	N/A	N	N/A	N/A	N/A	N/A	N/A	N/A	N/A	1.48218	yes	-0.493059	no	N/A	N/A	N/A	N/A	N/A	N	N/A	N/A	N/A
N/A	N/A	PPAS0A12850	N/A	N/A	376	N/A	N/A	N/A	N/A	N/A	Y	N	N/A	N/A	N	N/A	N/A	N/A	N/A	N/A	N/A	N/A	5.83794	yes	-0.241277	no	N/A	N/A	N/A	N/A	N/A	Y	N/A	N/A	N/A
N/A	N/A	PPAS0A12870	N/A	N/A	377	N/A	N/A	N/A	N/A	N/A	N	N	N/A	N/A	N	N/A	N/A	N/A	N/A	N/A	N/A	N/A	0.801633	no	-0.139446	no	N/A	N/A	N/A	N/A	N/A	N	N/A	N/A	N/A
N/A	N/A	PPAS0A12920	N/A	N/A	378	N/A	N/A	N/A	N/A	N/A	N	N	N/A	N/A	N	N/A	N/A	N/A	N/A	N/A	N/A	N/A	1.30132	no	0.133572	no	N/A	N/A	N/A	N/A	N/A	Y	N/A	N/A	N/A
N/A	N/A	PPAS0A12980	N/A	N/A	379	N/A	N/A	N/A	N/A	N/A	N	N	N/A	N/A	N	N/A	N/A	N/A	N/A	N/A	N/A	N/A	1.13143	no	-0.086467	no	N/A	N/A	N/A	N/A	N/A	N	N/A	N/A	N/A
N/A	N/A	PPAS0A12990	N/A	N/A	380	N/A	N/A	N/A	N/A	N/A	N	N	N/A	N/A	N	N/A	N/A	N/A	N/A	N/A	N/A	N/A	2.21278	no	-1.4836	no	N/A	N/A	N/A	N/A	N/A	N	N/A	N/A	N/A
N/A	N/A	PPAS0A13040	N/A	N/A	381	N/A	N/A	N/A	N/A	N/A	N	N	N/A	N/A	N	N/A	N/A	N/A	N/A	N/A	N/A	N/A	-0.216213	no	0.0780408	no	N/A	N/A	N/A	N/A	N/A	N	N/A	N/A	N/A
N/A	N/A	PPAS0A13100	N/A	N/A	382	N/A	N/A	N/A	N/A	N/A	N	N	N/A	N/A	N	N/A	N/A	N/A	N/A	N/A	N/A	N/A	-0.766893	no	0.0923185	no	N/A	N/A	N/A	N/A	N/A	N	N/A	N/A	N/A
N/A	N/A	PPAS0A13130	N/A	N/A	383	N/A	N/A	N/A	N/A	N/A	N	N	N/A	N/A	N	N/A	N/A	N/A	N/A	N/A	N/A	N/A	-0.441848	no	0.153021	no	N/A	N/A	N/A	N/A	N/A	N	N/A	N/A	N/A
N/A	N/A	PPAS0A13160	N/A	N/A	384	N/A	N/A	N/A	N/A	N/A	N	N	N/A	N/A	N	N/A	N/A	N/A	N/A	N/A	N/A	N/A	-0.219664	no	0.0389921	no	N/A	N/A	N/A	N/A	N/A	Y	N/A	N/A	N/A
N/A	N/A	PPAS0A13180	N/A	N/A	385	N/A	N/A	N/A	N/A	N/A	N	N	N/A	N/A	N	N/A	N/A	N/A	N/A	N/A	N/A	N/A	1.04884	no	0.144558	no	N/A	N/A	N/A	N/A	N/A	Y	N/A	N/A	N/A
N/A	N/A	PPAS0A13190	N/A	N/A	386	N/A	N/A	N/A	N/A	N/A	N	N	N/A	N/A	N	N/A	N/A	N/A	N/A	N/A	N/A	N/A	2.88872	yes	0.38426	no	N/A	N/A	N/A	N/A	N/A	Y	N/A	N/A	N/A
N/A	N/A	PPAS0A13230	N/A	N/A	387	N/A	N/A	N/A	N/A	N/A	Y	N	N/A	N/A	N	N/A	N/A	N/A	N/A	N/A	N/A	N/A	N/A	N/A	N/A	N/A	N/A	N/A	N/A	N/A	N/A	N	N/A	N/A	N/A
N/A	N/A	PPAS0A13300	N/A	N/A	388	N/A	N/A	N/A	N/A	N/A	Y	N	N/A	N/A	N	N/A	N/A	N/A	N/A	N/A	N/A	N/A	-2.90792	yes	-0.713785	yes	N/A	N/A	N/A	N/A	N/A	Y	N/A	N/A	N/A
N/A	N/A	PPAS0A13310	N/A	N/A	389	N/A	N/A	N/A	N/A	N/A	Y	N	N/A	N/A	N	N/A	N/A	N/A	N/A	N/A	N/A	N/A	3.06866	yes	-4.99455	yes	N/A	N/A	N/A	N/A	N/A	Y	N/A	N/A	N/A
N/A	N/A	PPAS0A13320	N/A	N/A	390	N/A	N/A	N/A	N/A	N/A	N	N	N/A	N/A	N	N/A	N/A	N/A	N/A	N/A	N/A	N/A	0.639928	no	-0.136859	no	N/A	N/A	N/A	N/A	N/A	N	N/A	N/A	N/A
N/A	N/A	PPAS0A13340	N/A	N/A	391	N/A	N/A	N/A	N/A	N/A	N	N	N/A	N/A	N	N/A	N/A	N/A	N/A	N/A	N/A	N/A	6.7615	yes	-5.86311	yes	N/A	N/A	N/A	N/A	N/A	N	N/A	N/A	N/A
N/A	N/A	PPAS0A13350	N/A	N/A	392	N/A	N/A	N/A	N/A	N/A	Y	N	N/A	N/A	N	N/A	N/A	N/A	N/A	N/A	N/A	N/A	6.7615	yes	-5.86311	yes	N/A	N/A	N/A	N/A	N/A	Y	N/A	N/A	N/A
N/A	N/A	PPAS0A13380	N/A	N/A	393	N/A	N/A	N/A	N/A	N/A	Y	N	N/A	N/A	N	N/A	N/A	N/A	N/A	N/A	N/A	N/A	N/A	N/A	N/A	N/A	N/A	N/A	N/A	N/A	N/A	Y	N/A	N/A	N/A
N/A	N/A	PPAS0A13390	N/A	N/A	394	N/A	N/A	N/A	N/A	N/A	Y	N	N/A	N/A	N	N/A	N/A	N/A	N/A	N/A	N/A	N/A	0	no	0	no	N/A	N/A	N/A	N/A	N/A	Y	N/A	N/A	N/A
N/A	N/A	PPAS0A13400	N/A	N/A	395	N/A	N/A	N/A	N/A	N/A	Y	N	N/A	N/A	N	N/A	N/A	N/A	N/A	N/A	N/A	N/A	0	no	0	no	N/A	N/A	N/A	N/A	N/A	Y	N/A	N/A	N/A
N/A	N/A	PPAS0A13460	N/A	N/A	396	N/A	N/A	N/A	N/A	N/A	Y	N	N/A	N/A	N	N/A	N/A	N/A	N/A	N/A	N/A	N/A	-2.74195	yes	0.0226878	no	N/A	N/A	N/A	N/A	N/A	Y	N/A	N/A	N/A
N/A	N/A	PPAS0A13480	N/A	N/A	397	N/A	N/A	N/A	N/A	N/A	N	N	N/A	N/A	N	N/A	N/A	N/A	N/A	N/A	N/A	N/A	-0.82006	no	0.187877	no	N/A	N/A	N/A	N/A	N/A	N	N/A	N/A	N/A
N/A	N/A	PPAS0A13500	N/A	N/A	398	N/A	N/A	N/A	N/A	N/A	N	N	N/A	N/A	N	N/A	N/A	N/A	N/A	N/A	N/A	N/A	2.35466	no	0.299452	no	N/A	N/A	N/A	N/A	N/A	Y	N/A	N/A	N/A
N/A	N/A	PPAS0A13510	N/A	N/A	399	N/A	N/A	N/A	N/A	N/A	N	N	N/A	N/A	N	N/A	N/A	N/A	N/A	N/A	N/A	N/A	-0.33971	no	0.412126	no	N/A	N/A	N/A	N/A	N/A	Y	N/A	N/A	N/A
N/A	N/A	PPAS0A13550	N/A	N/A	400	N/A	N/A	N/A	N/A	N/A	Y	N	N/A	N/A	N	N/A	N/A	N/A	N/A	N/A	N/A	N/A	3.06542	no	-0.0240613	no	N/A	N/A	N/A	N/A	N/A	Y	N/A	N/A	N/A
N/A	N/A	PPAS0A13580	N/A	N/A	401	N/A	N/A	N/A	N/A	N/A	N	N	N/A	N/A	N	N/A	N/A	N/A	N/A	N/A	N/A	N/A	N/A	N/A	N/A	N/A	N/A	N/A	N/A	N/A	N/A	N	N/A	N/A	N/A
N/A	N/A	PPAS0A13680	N/A	N/A	402	N/A	N/A	N/A	N/A	N/A	N	N	N/A	N/A	N	N/A	N/A	N/A	N/A	N/A	N/A	N/A	0	no	0	no	N/A	N/A	N/A	N/A	N/A	N	N/A	N/A	N/A
N/A	N/A	PPAS0A13710	N/A	N/A	403	N/A	N/A	N/A	N/A	N/A	N	N	N/A	N/A	N	N/A	N/A	N/A	N/A	N/A	N/A	N/A	0	no	0	no	N/A	N/A	N/A	N/A	N/A	N	N/A	N/A	N/A
N/A	N/A	PPAS0A13730	N/A	N/A	404	N/A	N/A	N/A	N/A	N/A	N	N	N/A	N/A	N	N/A	N/A	N/A	N/A	N/A	N/A	N/A	0	no	0	no	N/A	N/A	N/A	N/A	N/A	N	N/A	N/A	N/A
N/A	N/A	PPAS0A13760	N/A	N/A	405	N/A	N/A	N/A	N/A	N/A	N	N	N/A	N/A	N	N/A	N/A	N/A	N/A	N/A	N/A	N/A	-1.55056	yes	0.0236422	no	N/A	N/A	N/A	N/A	N/A	N	N/A	N/A	N/A
N/A	N/A	PPAS0A13770	N/A	N/A	406	N/A	N/A	N/A	N/A	N/A	N	N	N/A	N/A	N	N/A	N/A	N/A	N/A	N/A	N/A	N/A	N/A	N/A	N/A	N/A	N/A	N/A	N/A	N/A	N/A	N	N/A	N/A	N/A
N/A	N/A	PPAS0A13780	N/A	N/A	407	N/A	N/A	N/A	N/A	N/A	N	N	N/A	N/A	N	N/A	N/A	N/A	N/A	N/A	N/A	N/A	4.50515	yes	-1.48226	yes	N/A	N/A	N/A	N/A	N/A	N	N/A	N/A	N/A
N/A	N/A	PPAS0A13790	N/A	N/A	408	N/A	N/A	N/A	N/A	N/A	Y	N	N/A	N/A	N	N/A	N/A	N/A	N/A	N/A	N/A	N/A	3.3382	yes	-0.43758	no	N/A	N/A	N/A	N/A	N/A	Y	N/A	N/A	N/A
N/A	N/A	PPAS0A13800	N/A	N/A	409	N/A	N/A	N/A	N/A	N/A	Y	N	N/A	N/A	N	N/A	N/A	N/A	N/A	N/A	N/A	N/A	-0.257214	no	-0.605032	no	N/A	N/A	N/A	N/A	N/A	Y	N/A	N/A	N/A
N/A	N/A	PPAS0A13860	N/A	N/A	410	N/A	N/A	N/A	N/A	N/A	N	N	N/A	N/A	N	N/A	N/A	N/A	N/A	N/A	N/A	N/A	0.704174	no	0.075676	no	N/A	N/A	N/A	N/A	N/A	N	N/A	N/A	N/A
N/A	N/A	PPAS0A13880	N/A	N/A	411	N/A	N/A	N/A	N/A	N/A	N	N	N/A	N/A	N	N/A	N/A	N/A	N/A	N/A	N/A	N/A	0.999177	yes	-0.000289174	no	N/A	N/A	N/A	N/A	N/A	N	N/A	N/A	N/A
N/A	N/A	PPAS0A13890	N/A	N/A	412	N/A	N/A	N/A	N/A	N/A	N	N	N/A	N/A	N	N/A	N/A	N/A	N/A	N/A	N/A	N/A	1.61455	yes	0.00085449	no	N/A	N/A	N/A	N/A	N/A	N	N/A	N/A	N/A
N/A	N/A	PPAS0A13900	N/A	N/A	413	N/A	N/A	N/A	N/A	N/A	N	N	N/A	N/A	N	N/A	N/A	N/A	N/A	N/A	N/A	N/A	0.963728	yes	-0.0751371	no	N/A	N/A	N/A	N/A	N/A	N	N/A	N/A	N/A
N/A	N/A	PPAS0A13930	N/A	N/A	414	N/A	N/A	N/A	N/A	N/A	N	N	N/A	N/A	N	N/A	N/A	N/A	N/A	N/A	N/A	N/A	2.93522	yes	0.171184	no	N/A	N/A	N/A	N/A	N/A	N	N/A	N/A	N/A
N/A	N/A	PPAS0A13940	N/A	N/A	415	N/A	N/A	N/A	N/A	N/A	N	N	N/A	N/A	N	N/A	N/A	N/A	N/A	N/A	N/A	N/A	0.71884	no	0.429393	no	N/A	N/A	N/A	N/A	N/A	N	N/A	N/A	N/A
N/A	N/A	PPAS0A13950	N/A	N/A	416	N/A	N/A	N/A	N/A	N/A	N	N	N/A	N/A	N	N/A	N/A	N/A	N/A	N/A	N/A	N/A	1.61847	yes	0.334395	no	N/A	N/A	N/A	N/A	N/A	N	N/A	N/A	N/A
N/A	N/A	PPAS0A13970	N/A	N/A	417	N/A	N/A	N/A	N/A	N/A	N	N	N/A	N/A	N	N/A	N/A	N/A	N/A	N/A	N/A	N/A	-1.71748	yes	0.198643	no	N/A	N/A	N/A	N/A	N/A	N	N/A	N/A	N/A
N/A	N/A	PPAS0A13990	N/A	N/A	418	N/A	N/A	N/A	N/A	N/A	N	N	N/A	N/A	N	N/A	N/A	N/A	N/A	N/A	N/A	N/A	N/A	N/A	N/A	N/A	N/A	N/A	N/A	N/A	N/A	N	N/A	N/A	N/A
N/A	N/A	PPAS0A14010	N/A	N/A	419	N/A	N/A	N/A	N/A	N/A	N	N	N/A	N/A	N	N/A	N/A	N/A	N/A	N/A	N/A	N/A	-0.522177	no	0.0217263	no	N/A	N/A	N/A	N/A	N/A	N	N/A	N/A	N/A
N/A	N/A	PPAS0A14030	N/A	N/A	420	N/A	N/A	N/A	N/A	N/A	N	N	N/A	N/A	N	N/A	N/A	N/A	N/A	N/A	N/A	N/A	0.679657	no	-0.422312	no	N/A	N/A	N/A	N/A	N/A	N	N/A	N/A	N/A
N/A	N/A	PPAS0A14050	N/A	N/A	421	N/A	N/A	N/A	N/A	N/A	N	N	N/A	N/A	N	N/A	N/A	N/A	N/A	N/A	N/A	N/A	4.72269	yes	-1.01492	yes	N/A	N/A	N/A	N/A	N/A	N	N/A	N/A	N/A
N/A	N/A	PPAS0A14140	N/A	N/A	422	N/A	N/A	N/A	N/A	N/A	Y	N	N/A	N/A	N	N/A	N/A	N/A	N/A	N/A	N/A	N/A	-0.046074	no	-0.20287	no	N/A	N/A	N/A	N/A	N/A	Y	N/A	N/A	N/A
N/A	N/A	PPAS0A14180	N/A	N/A	423	N/A	N/A	N/A	N/A	N/A	N	N	N/A	N/A	N	N/A	N/A	N/A	N/A	N/A	N/A	N/A	-0.229248	no	-0.478243	no	N/A	N/A	N/A	N/A	N/A	N	N/A	N/A	N/A
N/A	N/A	PPAS0A14190	N/A	N/A	424	N/A	N/A	N/A	N/A	N/A	N	N	N/A	N/A	N	N/A	N/A	N/A	N/A	N/A	N/A	N/A	-1.02811	yes	0.148328	no	N/A	N/A	N/A	N/A	N/A	N	N/A	N/A	N/A
N/A	N/A	PPAS0A14200	N/A	N/A	425	N/A	N/A	N/A	N/A	N/A	N	N	N/A	N/A	N	N/A	N/A	N/A	N/A	N/A	N/A	N/A	-1.02811	yes	0.148328	no	N/A	N/A	N/A	N/A	N/A	N	N/A	N/A	N/A
N/A	N/A	PPAS0A14250	N/A	N/A	426	N/A	N/A	N/A	N/A	N/A	N	N	N/A	N/A	N	N/A	N/A	N/A	N/A	N/A	N/A	N/A	N/A	N/A	N/A	N/A	N/A	N/A	N/A	N/A	N/A	N	N/A	N/A	N/A
N/A	N/A	PPAS0A14340	N/A	N/A	427	N/A	N/A	N/A	N/A	N/A	N	N	N/A	N/A	N	N/A	N/A	N/A	N/A	N/A	N/A	N/A	N/A	N/A	N/A	N/A	N/A	N/A	N/A	N/A	N/A	Y	N/A	N/A	N/A
N/A	N/A	PPAS0A14350	N/A	N/A	428	N/A	N/A	N/A	N/A	N/A	N	N	N/A	N/A	N	N/A	N/A	N/A	N/A	N/A	N/A	N/A	N/A	N/A	N/A	N/A	N/A	N/A	N/A	N/A	N/A	N	N/A	N/A	N/A
N/A	N/A	PPAS0A14380	N/A	N/A	429	N/A	N/A	N/A	N/A	N/A	Y	N	N/A	N/A	N	N/A	N/A	N/A	N/A	N/A	N/A	N/A	N/A	N/A	N/A	N/A	N/A	N/A	N/A	N/A	N/A	N	N/A	N/A	N/A
N/A	N/A	PPAS0A14400	N/A	N/A	430	N/A	N/A	N/A	N/A	N/A	N	N	N/A	N/A	N	N/A	N/A	N/A	N/A	N/A	N/A	N/A	1.68327	yes	0.143091	no	N/A	N/A	N/A	N/A	N/A	N	N/A	N/A	N/A
N/A	N/A	PPAS0A14420	N/A	N/A	431	N/A	N/A	N/A	N/A	N/A	N	N	N/A	N/A	N	N/A	N/A	N/A	N/A	N/A	N/A	N/A	1.68327	yes	0.143091	no	N/A	N/A	N/A	N/A	N/A	N	N/A	N/A	N/A
N/A	N/A	PPAS0A14520	N/A	N/A	432	N/A	N/A	N/A	N/A	N/A	N	N	N/A	N/A	N	N/A	N/A	N/A	N/A	N/A	N/A	N/A	-0.0159678	no	0.10166	no	N/A	N/A	N/A	N/A	N/A	Y	N/A	N/A	N/A
N/A	N/A	PPAS0A14540	N/A	N/A	433	N/A	N/A	N/A	N/A	N/A	Y	N	N/A	N/A	N	N/A	N/A	N/A	N/A	N/A	N/A	N/A	0.962368	yes	0.170286	no	N/A	N/A	N/A	N/A	N/A	Y	N/A	N/A	N/A
N/A	N/A	PPAS0A14590	N/A	N/A	434	N/A	N/A	N/A	N/A	N/A	N	N	N/A	N/A	N	N/A	N/A	N/A	N/A	N/A	N/A	N/A	0.710289	no	0.0926043	no	N/A	N/A	N/A	N/A	N/A	Y	N/A	N/A	N/A
N/A	N/A	PPAS0A14610	N/A	N/A	435	N/A	N/A	N/A	N/A	N/A	N	N	N/A	N/A	N	N/A	N/A	N/A	N/A	N/A	N/A	N/A	1.37046	yes	0.379243	no	N/A	N/A	N/A	N/A	N/A	N	N/A	N/A	N/A
N/A	N/A	PPAS0A14670	N/A	N/A	436	N/A	N/A	N/A	N/A	N/A	N	N	N/A	N/A	N	N/A	N/A	N/A	N/A	N/A	N/A	N/A	2.93174	yes	0.230106	no	N/A	N/A	N/A	N/A	N/A	N	N/A	N/A	N/A
N/A	N/A	PPAS0A14680	N/A	N/A	437	N/A	N/A	N/A	N/A	N/A	N	N	N/A	N/A	N	N/A	N/A	N/A	N/A	N/A	N/A	N/A	N/A	N/A	N/A	N/A	N/A	N/A	N/A	N/A	N/A	N	N/A	N/A	N/A
N/A	N/A	PPAS0A14690	N/A	N/A	438	N/A	N/A	N/A	N/A	N/A	N	N	N/A	N/A	N	N/A	N/A	N/A	N/A	N/A	N/A	N/A	0.449128	no	-1.60212	yes	N/A	N/A	N/A	N/A	N/A	Y	N/A	N/A	N/A
N/A	N/A	PPAS0A14700	N/A	N/A	439	N/A	N/A	N/A	N/A	N/A	N	N	N/A	N/A	N	N/A	N/A	N/A	N/A	N/A	N/A	N/A	-0.450797	no	0.310499	no	N/A	N/A	N/A	N/A	N/A	N	N/A	N/A	N/A
N/A	N/A	PPAS0A14760	N/A	N/A	440	N/A	N/A	N/A	N/A	N/A	N	N	N/A	N/A	N	N/A	N/A	N/A	N/A	N/A	N/A	N/A	-0.182496	no	-0.305113	no	N/A	N/A	N/A	N/A	N/A	N	N/A	N/A	N/A
N/A	N/A	PPAS0A14790	N/A	N/A	441	N/A	N/A	N/A	N/A	N/A	N	N	N/A	N/A	N	N/A	N/A	N/A	N/A	N/A	N/A	N/A	-2.69364	yes	0.318465	no	N/A	N/A	N/A	N/A	N/A	N	N/A	N/A	N/A
N/A	N/A	PPAS0A14810	N/A	N/A	442	N/A	N/A	N/A	N/A	N/A	N	N	N/A	N/A	N	N/A	N/A	N/A	N/A	N/A	N/A	N/A	1.42503	yes	0.0317825	no	N/A	N/A	N/A	N/A	N/A	N	N/A	N/A	N/A
N/A	N/A	PPAS0A14830	N/A	N/A	443	N/A	N/A	N/A	N/A	N/A	Y	N	N/A	N/A	N	N/A	N/A	N/A	N/A	N/A	N/A	N/A	N/A	N/A	N/A	N/A	N/A	N/A	N/A	N/A	N/A	Y	N/A	N/A	N/A
N/A	N/A	PPAS0A14870	N/A	N/A	444	N/A	N/A	N/A	N/A	N/A	N	N	N/A	N/A	N	N/A	N/A	N/A	N/A	N/A	N/A	N/A	1.66328	yes	-1.24413	yes	N/A	N/A	N/A	N/A	N/A	N	N/A	N/A	N/A
N/A	N/A	PPAS0A14930	N/A	N/A	445	N/A	N/A	N/A	N/A	N/A	N	N	N/A	N/A	N	N/A	N/A	N/A	N/A	N/A	N/A	N/A	-0.374779	no	0.288602	no	N/A	N/A	N/A	N/A	N/A	N	N/A	N/A	N/A
N/A	N/A	PPAS0A14940	N/A	N/A	446	N/A	N/A	N/A	N/A	N/A	N	N	N/A	N/A	N	N/A	N/A	N/A	N/A	N/A	N/A	N/A	2.60832	yes	0.154019	no	N/A	N/A	N/A	N/A	N/A	N	N/A	N/A	N/A
N/A	N/A	PPAS0A14970	N/A	N/A	447	N/A	N/A	N/A	N/A	N/A	N	N	N/A	N/A	N	N/A	N/A	N/A	N/A	N/A	N/A	N/A	0.737048	yes	0.362644	no	N/A	N/A	N/A	N/A	N/A	N	N/A	N/A	N/A
N/A	N/A	PPAS0A14980	N/A	N/A	448	N/A	N/A	N/A	N/A	N/A	N	N	N/A	N/A	N	N/A	N/A	N/A	N/A	N/A	N/A	N/A	-1.23287	yes	0.244003	no	N/A	N/A	N/A	N/A	N/A	N	N/A	N/A	N/A
N/A	N/A	PPAS0A14990	N/A	N/A	449	N/A	N/A	N/A	N/A	N/A	Y	N	N/A	N/A	N	N/A	N/A	N/A	N/A	N/A	N/A	N/A	-0.787809	yes	-0.637925	no	N/A	N/A	N/A	N/A	N/A	Y	N/A	N/A	N/A
N/A	N/A	PPAS0A15010	N/A	N/A	450	N/A	N/A	N/A	N/A	N/A	N	N	N/A	N/A	N	N/A	N/A	N/A	N/A	N/A	N/A	N/A	1.74063	yes	-0.158736	no	N/A	N/A	N/A	N/A	N/A	N	N/A	N/A	N/A
N/A	N/A	PPAS0A15020	N/A	N/A	451	N/A	N/A	N/A	N/A	N/A	N	N	N/A	N/A	N	N/A	N/A	N/A	N/A	N/A	N/A	N/A	0.472336	no	0.0495537	no	N/A	N/A	N/A	N/A	N/A	N	N/A	N/A	N/A
N/A	N/A	PPAS0A15030	N/A	N/A	452	N/A	N/A	N/A	N/A	N/A	Y	N	N/A	N/A	N	N/A	N/A	N/A	N/A	N/A	N/A	N/A	-0.115778	no	-0.963364	yes	N/A	N/A	N/A	N/A	N/A	Y	N/A	N/A	N/A
N/A	N/A	PPAS0A15040	N/A	N/A	453	N/A	N/A	N/A	N/A	N/A	Y	N	N/A	N/A	N	N/A	N/A	N/A	N/A	N/A	N/A	N/A	2.90091	yes	0.150807	no	N/A	N/A	N/A	N/A	N/A	Y	N/A	N/A	N/A
N/A	N/A	PPAS0A15050	N/A	N/A	454	N/A	N/A	N/A	N/A	N/A	Y	N	N/A	N/A	N	N/A	N/A	N/A	N/A	N/A	N/A	N/A	-0.351696	no	0.162567	no	N/A	N/A	N/A	N/A	N/A	Y	N/A	N/A	N/A
N/A	N/A	PPAS0A15110	N/A	N/A	455	N/A	N/A	N/A	N/A	N/A	Y	N	N/A	N/A	N	N/A	N/A	N/A	N/A	N/A	N/A	N/A	N/A	N/A	N/A	N/A	N/A	N/A	N/A	N/A	N/A	N	N/A	N/A	N/A
N/A	N/A	PPAS0A15130	N/A	N/A	456	N/A	N/A	N/A	N/A	N/A	Y	N	N/A	N/A	N	N/A	N/A	N/A	N/A	N/A	N/A	N/A	N/A	N/A	N/A	N/A	N/A	N/A	N/A	N/A	N/A	N	N/A	N/A	N/A
N/A	N/A	PPAS0A15170	N/A	N/A	457	N/A	N/A	N/A	N/A	N/A	N	N	N/A	N/A	N	N/A	N/A	N/A	N/A	N/A	N/A	N/A	-0.0875686	no	0.236335	no	N/A	N/A	N/A	N/A	N/A	N	N/A	N/A	N/A
N/A	N/A	PPAS0A15180	N/A	N/A	458	N/A	N/A	N/A	N/A	N/A	N	N	N/A	N/A	N	N/A	N/A	N/A	N/A	N/A	N/A	N/A	-0.0875686	no	0.236335	no	N/A	N/A	N/A	N/A	N/A	N	N/A	N/A	N/A
N/A	N/A	PPAS0A15190	N/A	N/A	459	N/A	N/A	N/A	N/A	N/A	N	N	N/A	N/A	N	N/A	N/A	N/A	N/A	N/A	N/A	N/A	-0.0875686	no	0.236335	no	N/A	N/A	N/A	N/A	N/A	N	N/A	N/A	N/A
N/A	N/A	PPAS0A15200	N/A	N/A	460	N/A	N/A	N/A	N/A	N/A	N	N	N/A	N/A	N	N/A	N/A	N/A	N/A	N/A	N/A	N/A	1.23343	yes	0.211474	no	N/A	N/A	N/A	N/A	N/A	Y	N/A	N/A	N/A
N/A	N/A	PPAS0A15210	N/A	N/A	461	N/A	N/A	N/A	N/A	N/A	N	N	N/A	N/A	N	N/A	N/A	N/A	N/A	N/A	N/A	N/A	-0.0210194	no	0.288901	no	N/A	N/A	N/A	N/A	N/A	Y	N/A	N/A	N/A
N/A	N/A	PPAS0A15220	N/A	N/A	462	N/A	N/A	N/A	N/A	N/A	Y	N	N/A	N/A	N	N/A	N/A	N/A	N/A	N/A	N/A	N/A	2.71128	yes	-0.240002	no	N/A	N/A	N/A	N/A	N/A	N	N/A	N/A	N/A
N/A	N/A	PPAS0A15230	N/A	N/A	463	N/A	N/A	N/A	N/A	N/A	N	N	N/A	N/A	N	N/A	N/A	N/A	N/A	N/A	N/A	N/A	1.77015	yes	-0.792772	yes	N/A	N/A	N/A	N/A	N/A	N	N/A	N/A	N/A
N/A	N/A	PPAS0A15240	N/A	N/A	464	N/A	N/A	N/A	N/A	N/A	N	N	N/A	N/A	N	N/A	N/A	N/A	N/A	N/A	N/A	N/A	1.50762	yes	-0.332149	no	N/A	N/A	N/A	N/A	N/A	Y	N/A	N/A	N/A
N/A	N/A	PPAS0A15250	N/A	N/A	465	N/A	N/A	N/A	N/A	N/A	N	N	N/A	N/A	N	N/A	N/A	N/A	N/A	N/A	N/A	N/A	1.65379	yes	0.0419568	no	N/A	N/A	N/A	N/A	N/A	N	N/A	N/A	N/A
N/A	N/A	PPAS0A15270	N/A	N/A	466	N/A	N/A	N/A	N/A	N/A	N	N	N/A	N/A	N	N/A	N/A	N/A	N/A	N/A	N/A	N/A	0.944693	yes	0.204639	no	N/A	N/A	N/A	N/A	N/A	N	N/A	N/A	N/A
N/A	N/A	PPAS0A15280	N/A	N/A	467	N/A	N/A	N/A	N/A	N/A	N	N	N/A	N/A	N	N/A	N/A	N/A	N/A	N/A	N/A	N/A	1.51769	no	-0.0367145	no	N/A	N/A	N/A	N/A	N/A	Y	N/A	N/A	N/A
N/A	N/A	PPAS0A15290	N/A	N/A	468	N/A	N/A	N/A	N/A	N/A	N	N	N/A	N/A	N	N/A	N/A	N/A	N/A	N/A	N/A	N/A	4.30767	yes	-0.420811	no	N/A	N/A	N/A	N/A	N/A	N	N/A	N/A	N/A
N/A	N/A	PPAS0A15300	N/A	N/A	469	N/A	N/A	N/A	N/A	N/A	N	N	N/A	N/A	N	N/A	N/A	N/A	N/A	N/A	N/A	N/A	0.999189	no	-0.0572525	no	N/A	N/A	N/A	N/A	N/A	N	N/A	N/A	N/A
N/A	N/A	PPAS0A15310	N/A	N/A	470	N/A	N/A	N/A	N/A	N/A	N	N	N/A	N/A	N	N/A	N/A	N/A	N/A	N/A	N/A	N/A	2.27918	yes	0.208517	no	N/A	N/A	N/A	N/A	N/A	N	N/A	N/A	N/A
N/A	N/A	PPAS0A15350	N/A	N/A	471	N/A	N/A	N/A	N/A	N/A	N	N	N/A	N/A	N	N/A	N/A	N/A	N/A	N/A	N/A	N/A	2.0242	yes	-0.196294	no	N/A	N/A	N/A	N/A	N/A	Y	N/A	N/A	N/A
N/A	N/A	PPAS0B00100	N/A	N/A	472	N/A	N/A	N/A	N/A	N/A	N	N	N/A	N/A	N	N/A	N/A	N/A	N/A	N/A	N/A	N/A	-2.11858	yes	-1.08169	no	N/A	N/A	N/A	N/A	N/A	Y	N/A	N/A	N/A
N/A	N/A	PPAS0B00110	N/A	N/A	473	N/A	N/A	N/A	N/A	N/A	Y	N	N/A	N/A	N	N/A	N/A	N/A	N/A	N/A	N/A	N/A	0.755465	no	-0.0609098	no	N/A	N/A	N/A	N/A	N/A	Y	N/A	N/A	N/A
N/A	N/A	PPAS0B00120	N/A	N/A	474	N/A	N/A	N/A	N/A	N/A	Y	N	N/A	N/A	N	N/A	N/A	N/A	N/A	N/A	N/A	N/A	2.15031	yes	-0.166137	no	N/A	N/A	N/A	N/A	N/A	Y	N/A	N/A	N/A
N/A	N/A	PPAS0B00130	N/A	N/A	475	N/A	N/A	N/A	N/A	N/A	N	N	N/A	N/A	N	N/A	N/A	N/A	N/A	N/A	N/A	N/A	0.284609	no	-0.219336	no	N/A	N/A	N/A	N/A	N/A	N	N/A	N/A	N/A
N/A	N/A	PPAS0B00170	N/A	N/A	476	N/A	N/A	N/A	N/A	N/A	N	N	N/A	N/A	N	N/A	N/A	N/A	N/A	N/A	N/A	N/A	-0.0498225	no	0.150162	no	N/A	N/A	N/A	N/A	N/A	Y	N/A	N/A	N/A
N/A	N/A	PPAS0B00180	N/A	N/A	477	N/A	N/A	N/A	N/A	N/A	N	N	N/A	N/A	N	N/A	N/A	N/A	N/A	N/A	N/A	N/A	0.643608	no	0.0744974	no	N/A	N/A	N/A	N/A	N/A	Y	N/A	N/A	N/A
N/A	N/A	PPAS0B00190	N/A	N/A	478	N/A	N/A	N/A	N/A	N/A	N	N	N/A	N/A	N	N/A	N/A	N/A	N/A	N/A	N/A	N/A	0.0442219	no	0.488753	no	N/A	N/A	N/A	N/A	N/A	N	N/A	N/A	N/A
N/A	N/A	PPAS0B00210	N/A	N/A	479	N/A	N/A	N/A	N/A	N/A	Y	N	N/A	N/A	N	N/A	N/A	N/A	N/A	N/A	N/A	N/A	3.98087	yes	0.123833	no	N/A	N/A	N/A	N/A	N/A	Y	N/A	N/A	N/A
N/A	N/A	PPAS0B00220	N/A	N/A	480	N/A	N/A	N/A	N/A	N/A	Y	N	N/A	N/A	N	N/A	N/A	N/A	N/A	N/A	N/A	N/A	-4.45055	yes	0.201718	no	N/A	N/A	N/A	N/A	N/A	Y	N/A	N/A	N/A
N/A	N/A	PPAS0B00230	N/A	N/A	481	N/A	N/A	N/A	N/A	N/A	Y	N	N/A	N/A	N	N/A	N/A	N/A	N/A	N/A	N/A	N/A	1.79059	yes	-0.213238	no	N/A	N/A	N/A	N/A	N/A	N	N/A	N/A	N/A
N/A	N/A	PPAS0B00240	N/A	N/A	482	N/A	N/A	N/A	N/A	N/A	N	N	N/A	N/A	N	N/A	N/A	N/A	N/A	N/A	N/A	N/A	1.79059	yes	-0.213238	no	N/A	N/A	N/A	N/A	N/A	Y	N/A	N/A	N/A
N/A	N/A	PPAS0B00260	N/A	N/A	483	N/A	N/A	N/A	N/A	N/A	N	N	N/A	N/A	N	N/A	N/A	N/A	N/A	N/A	N/A	N/A	-0.737601	no	0.444231	no	N/A	N/A	N/A	N/A	N/A	N	N/A	N/A	N/A
N/A	N/A	PPAS0B00300	N/A	N/A	484	N/A	N/A	N/A	N/A	N/A	N	N	N/A	N/A	N	N/A	N/A	N/A	N/A	N/A	N/A	N/A	-0.295925	no	0.321866	no	N/A	N/A	N/A	N/A	N/A	N	N/A	N/A	N/A
N/A	N/A	PPAS0B00400	N/A	N/A	485	N/A	N/A	N/A	N/A	N/A	N	N	N/A	N/A	N	N/A	N/A	N/A	N/A	N/A	N/A	N/A	0.326758	no	-0.321733	no	N/A	N/A	N/A	N/A	N/A	N	N/A	N/A	N/A
N/A	N/A	PPAS0B00410	N/A	N/A	486	N/A	N/A	N/A	N/A	N/A	N	N	N/A	N/A	N	N/A	N/A	N/A	N/A	N/A	N/A	N/A	0.491073	no	-0.105634	no	N/A	N/A	N/A	N/A	N/A	N	N/A	N/A	N/A
N/A	N/A	PPAS0B00440	N/A	N/A	487	N/A	N/A	N/A	N/A	N/A	N	N	N/A	N/A	N	N/A	N/A	N/A	N/A	N/A	N/A	N/A	-0.795687	no	0.0919252	no	N/A	N/A	N/A	N/A	N/A	Y	N/A	N/A	N/A
N/A	N/A	PPAS0B00450	N/A	N/A	488	N/A	N/A	N/A	N/A	N/A	N	N	N/A	N/A	N	N/A	N/A	N/A	N/A	N/A	N/A	N/A	-0.795687	no	0.0919252	no	N/A	N/A	N/A	N/A	N/A	N	N/A	N/A	N/A
N/A	N/A	PPAS0B00460	N/A	N/A	489	N/A	N/A	N/A	N/A	N/A	N	N	N/A	N/A	N	N/A	N/A	N/A	N/A	N/A	N/A	N/A	-0.0036239	no	0.281367	no	N/A	N/A	N/A	N/A	N/A	Y	N/A	N/A	N/A
N/A	N/A	PPAS0B00510	N/A	N/A	490	N/A	N/A	N/A	N/A	N/A	N	N	N/A	N/A	N	N/A	N/A	N/A	N/A	N/A	N/A	N/A	0.311876	no	0.193384	no	N/A	N/A	N/A	N/A	N/A	N	N/A	N/A	N/A
N/A	N/A	PPAS0B00520	N/A	N/A	491	N/A	N/A	N/A	N/A	N/A	Y	N	N/A	N/A	N	N/A	N/A	N/A	N/A	N/A	N/A	N/A	-0.971279	no	-0.0637227	no	N/A	N/A	N/A	N/A	N/A	N	N/A	N/A	N/A
N/A	N/A	PPAS0B00540	N/A	N/A	492	N/A	N/A	N/A	N/A	N/A	N	N	N/A	N/A	N	N/A	N/A	N/A	N/A	N/A	N/A	N/A	-1.18848	yes	0.503471	no	N/A	N/A	N/A	N/A	N/A	N	N/A	N/A	N/A
N/A	N/A	PPAS0B00660	N/A	N/A	493	N/A	N/A	N/A	N/A	N/A	N	N	N/A	N/A	N	N/A	N/A	N/A	N/A	N/A	N/A	N/A	-1.55184	yes	0.0930244	no	N/A	N/A	N/A	N/A	N/A	N	N/A	N/A	N/A
N/A	N/A	PPAS0B00670	N/A	N/A	494	N/A	N/A	N/A	N/A	N/A	N	N	N/A	N/A	N	N/A	N/A	N/A	N/A	N/A	N/A	N/A	N/A	N/A	N/A	N/A	N/A	N/A	N/A	N/A	N/A	N	N/A	N/A	N/A
N/A	N/A	PPAS0B00690	N/A	N/A	495	N/A	N/A	N/A	N/A	N/A	Y	N	N/A	N/A	N	N/A	N/A	N/A	N/A	N/A	N/A	N/A	N/A	N/A	N/A	N/A	N/A	N/A	N/A	N/A	N/A	N	N/A	N/A	N/A
N/A	N/A	PPAS0B00700	N/A	N/A	496	N/A	N/A	N/A	N/A	N/A	Y	N	N/A	N/A	N	N/A	N/A	N/A	N/A	N/A	N/A	N/A	-0.777744	no	-0.464771	no	N/A	N/A	N/A	N/A	N/A	N	N/A	N/A	N/A
N/A	N/A	PPAS0B00710	N/A	N/A	497	N/A	N/A	N/A	N/A	N/A	Y	N	N/A	N/A	N	N/A	N/A	N/A	N/A	N/A	N/A	N/A	-0.777744	no	-0.464771	no	N/A	N/A	N/A	N/A	N/A	N	N/A	N/A	N/A
N/A	N/A	PPAS0B00720	N/A	N/A	498	N/A	N/A	N/A	N/A	N/A	Y	N	N/A	N/A	N	N/A	N/A	N/A	N/A	N/A	N/A	N/A	0.225431	no	0.0897545	no	N/A	N/A	N/A	N/A	N/A	N	N/A	N/A	N/A
N/A	N/A	PPAS0B00870	N/A	N/A	499	N/A	N/A	N/A	N/A	N/A	N	N	N/A	N/A	N	N/A	N/A	N/A	N/A	N/A	N/A	N/A	-0.316151	no	0.117033	no	N/A	N/A	N/A	N/A	N/A	N	N/A	N/A	N/A
N/A	N/A	PPAS0B00880	N/A	N/A	500	N/A	N/A	N/A	N/A	N/A	N	N	N/A	N/A	N	N/A	N/A	N/A	N/A	N/A	N/A	N/A	-0.316151	no	0.117033	no	N/A	N/A	N/A	N/A	N/A	N	N/A	N/A	N/A
N/A	N/A	PPAS0B00890	N/A	N/A	501	N/A	N/A	N/A	N/A	N/A	N	N	N/A	N/A	N	N/A	N/A	N/A	N/A	N/A	N/A	N/A	-0.316151	no	0.117033	no	N/A	N/A	N/A	N/A	N/A	N	N/A	N/A	N/A
N/A	N/A	PPAS0B00910	N/A	N/A	502	N/A	N/A	N/A	N/A	N/A	N	N	N/A	N/A	N	N/A	N/A	N/A	N/A	N/A	N/A	N/A	-0.316151	no	0.117033	no	N/A	N/A	N/A	N/A	N/A	N	N/A	N/A	N/A
N/A	N/A	PPAS0B00940	N/A	N/A	503	N/A	N/A	N/A	N/A	N/A	N	N	N/A	N/A	N	N/A	N/A	N/A	N/A	N/A	N/A	N/A	2.26064	yes	-0.0804524	no	N/A	N/A	N/A	N/A	N/A	N	N/A	N/A	N/A
N/A	N/A	PPAS0B00950	N/A	N/A	504	N/A	N/A	N/A	N/A	N/A	N	N	N/A	N/A	N	N/A	N/A	N/A	N/A	N/A	N/A	N/A	0.447319	no	0.243693	no	N/A	N/A	N/A	N/A	N/A	N	N/A	N/A	N/A
N/A	N/A	PPAS0B00970	N/A	N/A	505	N/A	N/A	N/A	N/A	N/A	N	N	N/A	N/A	N	N/A	N/A	N/A	N/A	N/A	N/A	N/A	-1.36487	yes	0.243619	no	N/A	N/A	N/A	N/A	N/A	Y	N/A	N/A	N/A
N/A	N/A	PPAS0B00990	N/A	N/A	506	N/A	N/A	N/A	N/A	N/A	N	N	N/A	N/A	N	N/A	N/A	N/A	N/A	N/A	N/A	N/A	-0.205182	no	0.295923	no	N/A	N/A	N/A	N/A	N/A	Y	N/A	N/A	N/A
N/A	N/A	PPAS0B01040	N/A	N/A	507	N/A	N/A	N/A	N/A	N/A	N	N	N/A	N/A	N	N/A	N/A	N/A	N/A	N/A	N/A	N/A	-0.684151	no	-0.0653257	no	N/A	N/A	N/A	N/A	N/A	N	N/A	N/A	N/A
N/A	N/A	PPAS0B01050	N/A	N/A	508	N/A	N/A	N/A	N/A	N/A	N	N	N/A	N/A	N	N/A	N/A	N/A	N/A	N/A	N/A	N/A	2.17921	yes	-0.18141	no	N/A	N/A	N/A	N/A	N/A	N	N/A	N/A	N/A
N/A	N/A	PPAS0B01160	N/A	N/A	509	N/A	N/A	N/A	N/A	N/A	Y	N	N/A	N/A	N	N/A	N/A	N/A	N/A	N/A	N/A	N/A	-0.419925	no	0.388662	no	N/A	N/A	N/A	N/A	N/A	Y	N/A	N/A	N/A
N/A	N/A	PPAS0B01210	N/A	N/A	510	N/A	N/A	N/A	N/A	N/A	N	N	N/A	N/A	N	N/A	N/A	N/A	N/A	N/A	N/A	N/A	0.303652	no	-0.183218	no	N/A	N/A	N/A	N/A	N/A	N	N/A	N/A	N/A
N/A	N/A	PPAS0B01250	N/A	N/A	511	N/A	N/A	N/A	N/A	N/A	Y	N	N/A	N/A	N	N/A	N/A	N/A	N/A	N/A	N/A	N/A	0.356768	no	0.339242	no	N/A	N/A	N/A	N/A	N/A	Y	N/A	N/A	N/A
N/A	N/A	PPAS0B01260	N/A	N/A	512	N/A	N/A	N/A	N/A	N/A	Y	N	N/A	N/A	N	N/A	N/A	N/A	N/A	N/A	N/A	N/A	-2.69684	yes	0.343708	no	N/A	N/A	N/A	N/A	N/A	Y	N/A	N/A	N/A
N/A	N/A	PPAS0B01280	N/A	N/A	513	N/A	N/A	N/A	N/A	N/A	N	N	N/A	N/A	N	N/A	N/A	N/A	N/A	N/A	N/A	N/A	-0.97544	yes	0.0770755	no	N/A	N/A	N/A	N/A	N/A	N	N/A	N/A	N/A
N/A	N/A	PPAS0B01360	N/A	N/A	514	N/A	N/A	N/A	N/A	N/A	Y	N	N/A	N/A	N	N/A	N/A	N/A	N/A	N/A	N/A	N/A	0.113614	no	0.0230506	no	N/A	N/A	N/A	N/A	N/A	N	N/A	N/A	N/A
N/A	N/A	PPAS0B01390	N/A	N/A	515	N/A	N/A	N/A	N/A	N/A	Y	N	N/A	N/A	N	N/A	N/A	N/A	N/A	N/A	N/A	N/A	5.93421	yes	-1.25999	no	N/A	N/A	N/A	N/A	N/A	N	N/A	N/A	N/A
N/A	N/A	PPAS0B01400	N/A	N/A	516	N/A	N/A	N/A	N/A	N/A	N	N	N/A	N/A	N	N/A	N/A	N/A	N/A	N/A	N/A	N/A	-1.22881	yes	0.302437	no	N/A	N/A	N/A	N/A	N/A	Y	N/A	N/A	N/A
N/A	N/A	PPAS0B01410	N/A	N/A	517	N/A	N/A	N/A	N/A	N/A	N	N	N/A	N/A	N	N/A	N/A	N/A	N/A	N/A	N/A	N/A	-0.474158	no	0.450907	no	N/A	N/A	N/A	N/A	N/A	N	N/A	N/A	N/A
N/A	N/A	PPAS0B01480	N/A	N/A	518	N/A	N/A	N/A	N/A	N/A	N	N	N/A	N/A	N	N/A	N/A	N/A	N/A	N/A	N/A	N/A	N/A	N/A	N/A	N/A	N/A	N/A	N/A	N/A	N/A	N	N/A	N/A	N/A
N/A	N/A	PPAS0B01530	N/A	N/A	519	N/A	N/A	N/A	N/A	N/A	N	N	N/A	N/A	N	N/A	N/A	N/A	N/A	N/A	N/A	N/A	0.637359	no	-0.522718	no	N/A	N/A	N/A	N/A	N/A	Y	N/A	N/A	N/A
N/A	N/A	PPAS0B01540	N/A	N/A	520	N/A	N/A	N/A	N/A	N/A	N	N	N/A	N/A	N	N/A	N/A	N/A	N/A	N/A	N/A	N/A	-1.71645	no	-0.448297	no	N/A	N/A	N/A	N/A	N/A	Y	N/A	N/A	N/A
N/A	N/A	PPAS0B01550	N/A	N/A	521	N/A	N/A	N/A	N/A	N/A	N	N	N/A	N/A	N	N/A	N/A	N/A	N/A	N/A	N/A	N/A	-1.83859	no	0.282381	no	N/A	N/A	N/A	N/A	N/A	Y	N/A	N/A	N/A
N/A	N/A	PPAS0B01590	N/A	N/A	522	N/A	N/A	N/A	N/A	N/A	N	N	N/A	N/A	N	N/A	N/A	N/A	N/A	N/A	N/A	N/A	-0.290884	no	-0.15931	no	N/A	N/A	N/A	N/A	N/A	Y	N/A	N/A	N/A
N/A	N/A	PPAS0B01610	N/A	N/A	523	N/A	N/A	N/A	N/A	N/A	N	N	N/A	N/A	N	N/A	N/A	N/A	N/A	N/A	N/A	N/A	-0.290884	no	-0.15931	no	N/A	N/A	N/A	N/A	N/A	N	N/A	N/A	N/A
N/A	N/A	PPAS0B01710	N/A	N/A	524	N/A	N/A	N/A	N/A	N/A	N	N	N/A	N/A	N	N/A	N/A	N/A	N/A	N/A	N/A	N/A	N/A	N/A	N/A	N/A	N/A	N/A	N/A	N/A	N/A	N	N/A	N/A	N/A
N/A	N/A	PPAS0B01800	N/A	N/A	525	N/A	N/A	N/A	N/A	N/A	N	N	N/A	N/A	N	N/A	N/A	N/A	N/A	N/A	N/A	N/A	-0.717884	no	0.127135	no	N/A	N/A	N/A	N/A	N/A	N	N/A	N/A	N/A
N/A	N/A	PPAS0B01860	N/A	N/A	526	N/A	N/A	N/A	N/A	N/A	N	N	N/A	N/A	N	N/A	N/A	N/A	N/A	N/A	N/A	N/A	-0.465524	no	0.38741	no	N/A	N/A	N/A	N/A	N/A	N	N/A	N/A	N/A
N/A	N/A	PPAS0B01870	N/A	N/A	527	N/A	N/A	N/A	N/A	N/A	N	N	N/A	N/A	N	N/A	N/A	N/A	N/A	N/A	N/A	N/A	1.49396	no	0.134952	no	N/A	N/A	N/A	N/A	N/A	N	N/A	N/A	N/A
N/A	N/A	PPAS0B01890	N/A	N/A	528	N/A	N/A	N/A	N/A	N/A	Y	N	N/A	N/A	N	N/A	N/A	N/A	N/A	N/A	N/A	N/A	-2.59359	yes	-0.169039	no	N/A	N/A	N/A	N/A	N/A	Y	N/A	N/A	N/A
N/A	N/A	PPAS0B01970	N/A	N/A	529	N/A	N/A	N/A	N/A	N/A	N	N	N/A	N/A	N	N/A	N/A	N/A	N/A	N/A	N/A	N/A	0.573794	no	0.461363	no	N/A	N/A	N/A	N/A	N/A	N	N/A	N/A	N/A
N/A	N/A	PPAS0B02050	N/A	N/A	530	N/A	N/A	N/A	N/A	N/A	N	N	N/A	N/A	N	N/A	N/A	N/A	N/A	N/A	N/A	N/A	N/A	N/A	N/A	N/A	N/A	N/A	N/A	N/A	N/A	N	N/A	N/A	N/A
N/A	N/A	PPAS0B02070	N/A	N/A	531	N/A	N/A	N/A	N/A	N/A	N	N	N/A	N/A	N	N/A	N/A	N/A	N/A	N/A	N/A	N/A	-0.12587	no	-0.134844	no	N/A	N/A	N/A	N/A	N/A	N	N/A	N/A	N/A
N/A	N/A	PPAS0B02190	N/A	N/A	532	N/A	N/A	N/A	N/A	N/A	N	N	N/A	N/A	N	N/A	N/A	N/A	N/A	N/A	N/A	N/A	0.832075	no	0.170162	no	N/A	N/A	N/A	N/A	N/A	N	N/A	N/A	N/A
N/A	N/A	PPAS0B02230	N/A	N/A	533	N/A	N/A	N/A	N/A	N/A	Y	N	N/A	N/A	N	N/A	N/A	N/A	N/A	N/A	N/A	N/A	N/A	N/A	N/A	N/A	N/A	N/A	N/A	N/A	N/A	N	N/A	N/A	N/A
N/A	N/A	PPAS0B02250	N/A	N/A	534	N/A	N/A	N/A	N/A	N/A	N	N	N/A	N/A	N	N/A	N/A	N/A	N/A	N/A	N/A	N/A	4.46271	yes	0.416466	no	N/A	N/A	N/A	N/A	N/A	N	N/A	N/A	N/A
N/A	N/A	PPAS0B02340	N/A	N/A	535	N/A	N/A	N/A	N/A	N/A	N	N	N/A	N/A	N	N/A	N/A	N/A	N/A	N/A	N/A	N/A	0.458071	no	-0.0209612	no	N/A	N/A	N/A	N/A	N/A	N	N/A	N/A	N/A
N/A	N/A	PPAS0B02380	N/A	N/A	536	N/A	N/A	N/A	N/A	N/A	N	N	N/A	N/A	N	N/A	N/A	N/A	N/A	N/A	N/A	N/A	0.598028	yes	-0.0857915	no	N/A	N/A	N/A	N/A	N/A	N	N/A	N/A	N/A
N/A	N/A	PPAS0B02400	N/A	N/A	537	N/A	N/A	N/A	N/A	N/A	N	N	N/A	N/A	N	N/A	N/A	N/A	N/A	N/A	N/A	N/A	-0.922479	no	0.121379	no	N/A	N/A	N/A	N/A	N/A	N	N/A	N/A	N/A
N/A	N/A	PPAS0B02410	N/A	N/A	538	N/A	N/A	N/A	N/A	N/A	N	N	N/A	N/A	N	N/A	N/A	N/A	N/A	N/A	N/A	N/A	-0.922479	no	0.121379	no	N/A	N/A	N/A	N/A	N/A	N	N/A	N/A	N/A
N/A	N/A	PPAS0B02430	N/A	N/A	539	N/A	N/A	N/A	N/A	N/A	N	N	N/A	N/A	N	N/A	N/A	N/A	N/A	N/A	N/A	N/A	0.617971	no	-0.230319	no	N/A	N/A	N/A	N/A	N/A	N	N/A	N/A	N/A
N/A	N/A	PPAS0B02510	N/A	N/A	540	N/A	N/A	N/A	N/A	N/A	N	N	N/A	N/A	N	N/A	N/A	N/A	N/A	N/A	N/A	N/A	-0.332247	no	0.321606	no	N/A	N/A	N/A	N/A	N/A	N	N/A	N/A	N/A
N/A	N/A	PPAS0B02530	N/A	N/A	541	N/A	N/A	N/A	N/A	N/A	Y	N	N/A	N/A	N	N/A	N/A	N/A	N/A	N/A	N/A	N/A	-5.5056	yes	0.214094	no	N/A	N/A	N/A	N/A	N/A	Y	N/A	N/A	N/A
N/A	N/A	PPAS0B02600	N/A	N/A	542	N/A	N/A	N/A	N/A	N/A	N	N	N/A	N/A	N	N/A	N/A	N/A	N/A	N/A	N/A	N/A	-0.125119	no	0.178756	no	N/A	N/A	N/A	N/A	N/A	Y	N/A	N/A	N/A
N/A	N/A	PPAS0B02670	N/A	N/A	543	N/A	N/A	N/A	N/A	N/A	N	N	N/A	N/A	N	N/A	N/A	N/A	N/A	N/A	N/A	N/A	-2.086	yes	-0.133487	no	N/A	N/A	N/A	N/A	N/A	Y	N/A	N/A	N/A
N/A	N/A	PPAS0B02710	N/A	N/A	544	N/A	N/A	N/A	N/A	N/A	N	N	N/A	N/A	N	N/A	N/A	N/A	N/A	N/A	N/A	N/A	0	no	-3.04678	yes	N/A	N/A	N/A	N/A	N/A	Y	N/A	N/A	N/A
N/A	N/A	PPAS0B02730	N/A	N/A	545	N/A	N/A	N/A	N/A	N/A	N	N	N/A	N/A	N	N/A	N/A	N/A	N/A	N/A	N/A	N/A	0	no	-3.04678	yes	N/A	N/A	N/A	N/A	N/A	N	N/A	N/A	N/A
N/A	N/A	PPAS0B02750	N/A	N/A	546	N/A	N/A	N/A	N/A	N/A	Y	N	N/A	N/A	N	N/A	N/A	N/A	N/A	N/A	N/A	N/A	0	no	0.0654283	no	N/A	N/A	N/A	N/A	N/A	Y	N/A	N/A	N/A
N/A	N/A	PPAS0B02770	N/A	N/A	547	N/A	N/A	N/A	N/A	N/A	Y	N	N/A	N/A	N	N/A	N/A	N/A	N/A	N/A	N/A	N/A	-0.287013	no	0.0325843	no	N/A	N/A	N/A	N/A	N/A	N	N/A	N/A	N/A
N/A	N/A	PPAS0B02860	N/A	N/A	548	N/A	N/A	N/A	N/A	N/A	N	N	N/A	N/A	N	N/A	N/A	N/A	N/A	N/A	N/A	N/A	3.98301	yes	0.288823	no	N/A	N/A	N/A	N/A	N/A	N	N/A	N/A	N/A
N/A	N/A	PPAS0B02880	N/A	N/A	549	N/A	N/A	N/A	N/A	N/A	N	N	N/A	N/A	N	N/A	N/A	N/A	N/A	N/A	N/A	N/A	N/A	N/A	N/A	N/A	N/A	N/A	N/A	N/A	N/A	N	N/A	N/A	N/A
N/A	N/A	PPAS0B02890	N/A	N/A	550	N/A	N/A	N/A	N/A	N/A	N	N	N/A	N/A	N	N/A	N/A	N/A	N/A	N/A	N/A	N/A	N/A	N/A	N/A	N/A	N/A	N/A	N/A	N/A	N/A	N	N/A	N/A	N/A
N/A	N/A	PPAS0B02950	N/A	N/A	551	N/A	N/A	N/A	N/A	N/A	N	N	N/A	N/A	N	N/A	N/A	N/A	N/A	N/A	N/A	N/A	N/A	N/A	N/A	N/A	N/A	N/A	N/A	N/A	N/A	N	N/A	N/A	N/A
N/A	N/A	PPAS0B02980	N/A	N/A	552	N/A	N/A	N/A	N/A	N/A	Y	N	N/A	N/A	N	N/A	N/A	N/A	N/A	N/A	N/A	N/A	0.483067	no	-0.126991	no	N/A	N/A	N/A	N/A	N/A	N	N/A	N/A	N/A
N/A	N/A	PPAS0B03000	N/A	N/A	553	N/A	N/A	N/A	N/A	N/A	Y	N	N/A	N/A	N	N/A	N/A	N/A	N/A	N/A	N/A	N/A	1.92871	yes	0.154286	no	N/A	N/A	N/A	N/A	N/A	Y	N/A	N/A	N/A
N/A	N/A	PPAS0B03050	N/A	N/A	554	N/A	N/A	N/A	N/A	N/A	N	N	N/A	N/A	N	N/A	N/A	N/A	N/A	N/A	N/A	N/A	N/A	N/A	N/A	N/A	N/A	N/A	N/A	N/A	N/A	N	N/A	N/A	N/A
N/A	N/A	PPAS0B03060	N/A	N/A	555	N/A	N/A	N/A	N/A	N/A	Y	N	N/A	N/A	N	N/A	N/A	N/A	N/A	N/A	N/A	N/A	3.72976	no	-0.02259	no	N/A	N/A	N/A	N/A	N/A	N	N/A	N/A	N/A
N/A	N/A	PPAS0B03090	N/A	N/A	556	N/A	N/A	N/A	N/A	N/A	Y	N	N/A	N/A	N	N/A	N/A	N/A	N/A	N/A	N/A	N/A	2.41672	no	0.543643	no	N/A	N/A	N/A	N/A	N/A	N	N/A	N/A	N/A
N/A	N/A	PPAS0B03100	N/A	N/A	557	N/A	N/A	N/A	N/A	N/A	N	N	N/A	N/A	N	N/A	N/A	N/A	N/A	N/A	N/A	N/A	2.41672	no	0.543643	no	N/A	N/A	N/A	N/A	N/A	N	N/A	N/A	N/A
N/A	N/A	PPAS0B03110	N/A	N/A	558	N/A	N/A	N/A	N/A	N/A	N	N	N/A	N/A	N	N/A	N/A	N/A	N/A	N/A	N/A	N/A	2.41672	no	0.543643	no	N/A	N/A	N/A	N/A	N/A	N	N/A	N/A	N/A
N/A	N/A	PPAS0B03220	N/A	N/A	559	N/A	N/A	N/A	N/A	N/A	Y	N	N/A	N/A	N	N/A	N/A	N/A	N/A	N/A	N/A	N/A	-1.39697	no	0.400359	no	N/A	N/A	N/A	N/A	N/A	Y	N/A	N/A	N/A
N/A	N/A	PPAS0B03270	N/A	N/A	560	N/A	N/A	N/A	N/A	N/A	N	N	N/A	N/A	N	N/A	N/A	N/A	N/A	N/A	N/A	N/A	1.04312	yes	-0.164996	no	N/A	N/A	N/A	N/A	N/A	N	N/A	N/A	N/A
N/A	N/A	PPAS0B03310	N/A	N/A	561	N/A	N/A	N/A	N/A	N/A	N	N	N/A	N/A	N	N/A	N/A	N/A	N/A	N/A	N/A	N/A	0.193738	no	0.0207087	no	N/A	N/A	N/A	N/A	N/A	N	N/A	N/A	N/A
N/A	N/A	PPAS0B03370	N/A	N/A	562	N/A	N/A	N/A	N/A	N/A	N	N	N/A	N/A	N	N/A	N/A	N/A	N/A	N/A	N/A	N/A	N/A	N/A	N/A	N/A	N/A	N/A	N/A	N/A	N/A	N	N/A	N/A	N/A
N/A	N/A	PPAS0B03380	N/A	N/A	563	N/A	N/A	N/A	N/A	N/A	N	N	N/A	N/A	N	N/A	N/A	N/A	N/A	N/A	N/A	N/A	-0.285004	no	-0.241409	no	N/A	N/A	N/A	N/A	N/A	N	N/A	N/A	N/A
N/A	N/A	PPAS0B03400	N/A	N/A	564	N/A	N/A	N/A	N/A	N/A	N	N	N/A	N/A	N	N/A	N/A	N/A	N/A	N/A	N/A	N/A	-0.285004	no	-0.241409	no	N/A	N/A	N/A	N/A	N/A	N	N/A	N/A	N/A
N/A	N/A	PPAS0B03450	N/A	N/A	565	N/A	N/A	N/A	N/A	N/A	Y	N	N/A	N/A	N	N/A	N/A	N/A	N/A	N/A	N/A	N/A	N/A	N/A	N/A	N/A	N/A	N/A	N/A	N/A	N/A	N	N/A	N/A	N/A
N/A	N/A	PPAS0B03460	N/A	N/A	566	N/A	N/A	N/A	N/A	N/A	Y	N	N/A	N/A	N	N/A	N/A	N/A	N/A	N/A	N/A	N/A	N/A	N/A	N/A	N/A	N/A	N/A	N/A	N/A	N/A	Y	N/A	N/A	N/A
N/A	N/A	PPAS0B03470	N/A	N/A	567	N/A	N/A	N/A	N/A	N/A	Y	N	N/A	N/A	N	N/A	N/A	N/A	N/A	N/A	N/A	N/A	N/A	N/A	N/A	N/A	N/A	N/A	N/A	N/A	N/A	Y	N/A	N/A	N/A
N/A	N/A	PPAS0B03530	N/A	N/A	568	N/A	N/A	N/A	N/A	N/A	N	N	N/A	N/A	N	N/A	N/A	N/A	N/A	N/A	N/A	N/A	0.899772	yes	0.3687	no	N/A	N/A	N/A	N/A	N/A	N	N/A	N/A	N/A
N/A	N/A	PPAS0B03540	N/A	N/A	569	N/A	N/A	N/A	N/A	N/A	N	N	N/A	N/A	N	N/A	N/A	N/A	N/A	N/A	N/A	N/A	N/A	N/A	N/A	N/A	N/A	N/A	N/A	N/A	N/A	N	N/A	N/A	N/A
N/A	N/A	PPAS0B03550	N/A	N/A	570	N/A	N/A	N/A	N/A	N/A	N	N	N/A	N/A	N	N/A	N/A	N/A	N/A	N/A	N/A	N/A	N/A	N/A	N/A	N/A	N/A	N/A	N/A	N/A	N/A	N	N/A	N/A	N/A
N/A	N/A	PPAS0B03600	N/A	N/A	571	N/A	N/A	N/A	N/A	N/A	N	N	N/A	N/A	N	N/A	N/A	N/A	N/A	N/A	N/A	N/A	-1.00515	no	-0.202625	no	N/A	N/A	N/A	N/A	N/A	N	N/A	N/A	N/A
N/A	N/A	PPAS0B03610	N/A	N/A	572	N/A	N/A	N/A	N/A	N/A	N	N	N/A	N/A	N	N/A	N/A	N/A	N/A	N/A	N/A	N/A	1.89942	no	-0.147198	no	N/A	N/A	N/A	N/A	N/A	N	N/A	N/A	N/A
N/A	N/A	PPAS0B03640	N/A	N/A	573	N/A	N/A	N/A	N/A	N/A	Y	N	N/A	N/A	N	N/A	N/A	N/A	N/A	N/A	N/A	N/A	0.368984	no	0.0289794	no	N/A	N/A	N/A	N/A	N/A	Y	N/A	N/A	N/A
N/A	N/A	PPAS0B03650	N/A	N/A	574	N/A	N/A	N/A	N/A	N/A	N	N	N/A	N/A	N	N/A	N/A	N/A	N/A	N/A	N/A	N/A	0.368984	no	0.0289794	no	N/A	N/A	N/A	N/A	N/A	N	N/A	N/A	N/A
N/A	N/A	PPAS0B03700	N/A	N/A	575	N/A	N/A	N/A	N/A	N/A	Y	N	N/A	N/A	N	N/A	N/A	N/A	N/A	N/A	N/A	N/A	-0.736709	no	-0.0886335	no	N/A	N/A	N/A	N/A	N/A	N	N/A	N/A	N/A
N/A	N/A	PPAS0B03780	N/A	N/A	576	N/A	N/A	N/A	N/A	N/A	N	N	N/A	N/A	N	N/A	N/A	N/A	N/A	N/A	N/A	N/A	1.43761	yes	0.103338	no	N/A	N/A	N/A	N/A	N/A	N	N/A	N/A	N/A
N/A	N/A	PPAS0B03880	N/A	N/A	577	N/A	N/A	N/A	N/A	N/A	N	N	N/A	N/A	N	N/A	N/A	N/A	N/A	N/A	N/A	N/A	0.765196	yes	0.0628618	no	N/A	N/A	N/A	N/A	N/A	N	N/A	N/A	N/A
N/A	N/A	PPAS0B03890	N/A	N/A	578	N/A	N/A	N/A	N/A	N/A	N	N	N/A	N/A	N	N/A	N/A	N/A	N/A	N/A	N/A	N/A	-1.32436	yes	0.267969	no	N/A	N/A	N/A	N/A	N/A	Y	N/A	N/A	N/A
N/A	N/A	PPAS0B03940	N/A	N/A	579	N/A	N/A	N/A	N/A	N/A	N	N	N/A	N/A	N	N/A	N/A	N/A	N/A	N/A	N/A	N/A	1.73607	yes	0	no	N/A	N/A	N/A	N/A	N/A	N	N/A	N/A	N/A
N/A	N/A	PPAS0B03970	N/A	N/A	580	N/A	N/A	N/A	N/A	N/A	N	N	N/A	N/A	N	N/A	N/A	N/A	N/A	N/A	N/A	N/A	2.54831	yes	-1.18603	yes	N/A	N/A	N/A	N/A	N/A	N	N/A	N/A	N/A
N/A	N/A	PPAS0B03990	N/A	N/A	581	N/A	N/A	N/A	N/A	N/A	N	N	N/A	N/A	N	N/A	N/A	N/A	N/A	N/A	N/A	N/A	0.0187632	no	0.574461	yes	N/A	N/A	N/A	N/A	N/A	N	N/A	N/A	N/A
N/A	N/A	PPAS0B04030	N/A	N/A	582	N/A	N/A	N/A	N/A	N/A	N	N	N/A	N/A	N	N/A	N/A	N/A	N/A	N/A	N/A	N/A	-0.0340918	no	0.0937698	no	N/A	N/A	N/A	N/A	N/A	N	N/A	N/A	N/A
N/A	N/A	PPAS0B04050	N/A	N/A	583	N/A	N/A	N/A	N/A	N/A	N	N	N/A	N/A	N	N/A	N/A	N/A	N/A	N/A	N/A	N/A	1.90584	yes	-1.02613	no	N/A	N/A	N/A	N/A	N/A	N	N/A	N/A	N/A
N/A	N/A	PPAS0B04060	N/A	N/A	584	N/A	N/A	N/A	N/A	N/A	N	N	N/A	N/A	N	N/A	N/A	N/A	N/A	N/A	N/A	N/A	0.109512	no	0.0282842	no	N/A	N/A	N/A	N/A	N/A	N	N/A	N/A	N/A
N/A	N/A	PPAS0B04070	N/A	N/A	585	N/A	N/A	N/A	N/A	N/A	N	N	N/A	N/A	N	N/A	N/A	N/A	N/A	N/A	N/A	N/A	1.31248	yes	0.0537403	no	N/A	N/A	N/A	N/A	N/A	N	N/A	N/A	N/A
N/A	N/A	PPAS0B04080	N/A	N/A	586	N/A	N/A	N/A	N/A	N/A	N	N	N/A	N/A	N	N/A	N/A	N/A	N/A	N/A	N/A	N/A	1.57262	yes	-0.795113	no	N/A	N/A	N/A	N/A	N/A	N	N/A	N/A	N/A
N/A	N/A	PPAS0B04090	N/A	N/A	587	N/A	N/A	N/A	N/A	N/A	N	N	N/A	N/A	N	N/A	N/A	N/A	N/A	N/A	N/A	N/A	1.57262	yes	-0.795113	no	N/A	N/A	N/A	N/A	N/A	Y	N/A	N/A	N/A
N/A	N/A	PPAS0B04110	N/A	N/A	588	N/A	N/A	N/A	N/A	N/A	Y	N	N/A	N/A	N	N/A	N/A	N/A	N/A	N/A	N/A	N/A	1.61506	yes	-0.160122	no	N/A	N/A	N/A	N/A	N/A	Y	N/A	N/A	N/A
N/A	N/A	PPAS0B04120	N/A	N/A	589	N/A	N/A	N/A	N/A	N/A	Y	N	N/A	N/A	N	N/A	N/A	N/A	N/A	N/A	N/A	N/A	N/A	N/A	N/A	N/A	N/A	N/A	N/A	N/A	N/A	Y	N/A	N/A	N/A
N/A	N/A	PPAS0B04150	N/A	N/A	590	N/A	N/A	N/A	N/A	N/A	N	N	N/A	N/A	N	N/A	N/A	N/A	N/A	N/A	N/A	N/A	1.29649	yes	-0.197385	no	N/A	N/A	N/A	N/A	N/A	Y	N/A	N/A	N/A
N/A	N/A	PPAS0B04160	N/A	N/A	591	N/A	N/A	N/A	N/A	N/A	N	N	N/A	N/A	N	N/A	N/A	N/A	N/A	N/A	N/A	N/A	N/A	N/A	N/A	N/A	N/A	N/A	N/A	N/A	N/A	N	N/A	N/A	N/A
N/A	N/A	PPAS0B04180	N/A	N/A	592	N/A	N/A	N/A	N/A	N/A	N	N	N/A	N/A	N	N/A	N/A	N/A	N/A	N/A	N/A	N/A	-0.888261	no	-0.094114	no	N/A	N/A	N/A	N/A	N/A	N	N/A	N/A	N/A
N/A	N/A	PPAS0B04190	N/A	N/A	593	N/A	N/A	N/A	N/A	N/A	N	N	N/A	N/A	N	N/A	N/A	N/A	N/A	N/A	N/A	N/A	-0.83703	no	-0.0914519	no	N/A	N/A	N/A	N/A	N/A	N	N/A	N/A	N/A
N/A	N/A	PPAS0B04200	N/A	N/A	594	N/A	N/A	N/A	N/A	N/A	N	N	N/A	N/A	N	N/A	N/A	N/A	N/A	N/A	N/A	N/A	-0.83703	no	-0.0914519	no	N/A	N/A	N/A	N/A	N/A	N	N/A	N/A	N/A
N/A	N/A	PPAS0B04220	N/A	N/A	595	N/A	N/A	N/A	N/A	N/A	N	N	N/A	N/A	N	N/A	N/A	N/A	N/A	N/A	N/A	N/A	N/A	N/A	N/A	N/A	N/A	N/A	N/A	N/A	N/A	Y	N/A	N/A	N/A
N/A	N/A	PPAS0B04240	N/A	N/A	596	N/A	N/A	N/A	N/A	N/A	Y	N	N/A	N/A	N	N/A	N/A	N/A	N/A	N/A	N/A	N/A	N/A	N/A	N/A	N/A	N/A	N/A	N/A	N/A	N/A	N	N/A	N/A	N/A
N/A	N/A	PPAS0B04250	N/A	N/A	597	N/A	N/A	N/A	N/A	N/A	N	N	N/A	N/A	N	N/A	N/A	N/A	N/A	N/A	N/A	N/A	N/A	N/A	N/A	N/A	N/A	N/A	N/A	N/A	N/A	N	N/A	N/A	N/A
N/A	N/A	PPAS0B04270	N/A	N/A	598	N/A	N/A	N/A	N/A	N/A	N	N	N/A	N/A	N	N/A	N/A	N/A	N/A	N/A	N/A	N/A	N/A	N/A	N/A	N/A	N/A	N/A	N/A	N/A	N/A	N	N/A	N/A	N/A
N/A	N/A	PPAS0B04280	N/A	N/A	599	N/A	N/A	N/A	N/A	N/A	N	N	N/A	N/A	N	N/A	N/A	N/A	N/A	N/A	N/A	N/A	0.863683	no	0.398233	no	N/A	N/A	N/A	N/A	N/A	Y	N/A	N/A	N/A
N/A	N/A	PPAS0B04330	N/A	N/A	600	N/A	N/A	N/A	N/A	N/A	N	N	N/A	N/A	N	N/A	N/A	N/A	N/A	N/A	N/A	N/A	0.978698	no	-0.268905	no	N/A	N/A	N/A	N/A	N/A	Y	N/A	N/A	N/A
N/A	N/A	PPAS0B04350	N/A	N/A	601	N/A	N/A	N/A	N/A	N/A	Y	N	N/A	N/A	N	N/A	N/A	N/A	N/A	N/A	N/A	N/A	-0.172385	no	-0.147009	no	N/A	N/A	N/A	N/A	N/A	Y	N/A	N/A	N/A
N/A	N/A	PPAS0B04360	N/A	N/A	602	N/A	N/A	N/A	N/A	N/A	N	N	N/A	N/A	N	N/A	N/A	N/A	N/A	N/A	N/A	N/A	-0.172385	no	-0.147009	no	N/A	N/A	N/A	N/A	N/A	N	N/A	N/A	N/A
N/A	N/A	PPAS0B04380	N/A	N/A	603	N/A	N/A	N/A	N/A	N/A	Y	N	N/A	N/A	N	N/A	N/A	N/A	N/A	N/A	N/A	N/A	0.333011	no	0.189879	no	N/A	N/A	N/A	N/A	N/A	Y	N/A	N/A	N/A
N/A	N/A	PPAS0B04390	N/A	N/A	604	N/A	N/A	N/A	N/A	N/A	N	N	N/A	N/A	N	N/A	N/A	N/A	N/A	N/A	N/A	N/A	1.16322	yes	-0.302347	no	N/A	N/A	N/A	N/A	N/A	N	N/A	N/A	N/A
N/A	N/A	PPAS0B04430	N/A	N/A	605	N/A	N/A	N/A	N/A	N/A	N	N	N/A	N/A	N	N/A	N/A	N/A	N/A	N/A	N/A	N/A	0.388943	no	0.403424	no	N/A	N/A	N/A	N/A	N/A	N	N/A	N/A	N/A
N/A	N/A	PPAS0B04540	N/A	N/A	606	N/A	N/A	N/A	N/A	N/A	N	N	N/A	N/A	N	N/A	N/A	N/A	N/A	N/A	N/A	N/A	1.40452	no	-0.206919	no	N/A	N/A	N/A	N/A	N/A	N	N/A	N/A	N/A
N/A	N/A	PPAS0B04570	N/A	N/A	607	N/A	N/A	N/A	N/A	N/A	N	N	N/A	N/A	N	N/A	N/A	N/A	N/A	N/A	N/A	N/A	N/A	N/A	N/A	N/A	N/A	N/A	N/A	N/A	N/A	N	N/A	N/A	N/A
N/A	N/A	PPAS0B04640	N/A	N/A	608	N/A	N/A	N/A	N/A	N/A	Y	N	N/A	N/A	N	N/A	N/A	N/A	N/A	N/A	N/A	N/A	0.464448	no	-0.825713	yes	N/A	N/A	N/A	N/A	N/A	Y	N/A	N/A	N/A
N/A	N/A	PPAS0B04750	N/A	N/A	609	N/A	N/A	N/A	N/A	N/A	N	N	N/A	N/A	N	N/A	N/A	N/A	N/A	N/A	N/A	N/A	0	no	0	no	N/A	N/A	N/A	N/A	N/A	Y	N/A	N/A	N/A
N/A	N/A	PPAS0B04780	N/A	N/A	610	N/A	N/A	N/A	N/A	N/A	N	N	N/A	N/A	N	N/A	N/A	N/A	N/A	N/A	N/A	N/A	0	no	0	no	N/A	N/A	N/A	N/A	N/A	N	N/A	N/A	N/A
N/A	N/A	PPAS0B04790	N/A	N/A	611	N/A	N/A	N/A	N/A	N/A	N	N	N/A	N/A	N	N/A	N/A	N/A	N/A	N/A	N/A	N/A	-1.09608	no	0.0580494	no	N/A	N/A	N/A	N/A	N/A	N	N/A	N/A	N/A
N/A	N/A	PPAS0B04800	N/A	N/A	612	N/A	N/A	N/A	N/A	N/A	Y	N	N/A	N/A	N	N/A	N/A	N/A	N/A	N/A	N/A	N/A	-0.694975	no	0.0564492	no	N/A	N/A	N/A	N/A	N/A	Y	N/A	N/A	N/A
N/A	N/A	PPAS0B04840	N/A	N/A	613	N/A	N/A	N/A	N/A	N/A	N	N	N/A	N/A	N	N/A	N/A	N/A	N/A	N/A	N/A	N/A	2.33517	yes	-0.319757	no	N/A	N/A	N/A	N/A	N/A	N	N/A	N/A	N/A
N/A	N/A	PPAS0B04890	N/A	N/A	614	N/A	N/A	N/A	N/A	N/A	N	N	N/A	N/A	N	N/A	N/A	N/A	N/A	N/A	N/A	N/A	N/A	N/A	N/A	N/A	N/A	N/A	N/A	N/A	N/A	N	N/A	N/A	N/A
N/A	N/A	PPAS0B04920	N/A	N/A	615	N/A	N/A	N/A	N/A	N/A	N	N	N/A	N/A	N	N/A	N/A	N/A	N/A	N/A	N/A	N/A	2.70976	yes	-0.0388773	no	N/A	N/A	N/A	N/A	N/A	N	N/A	N/A	N/A
N/A	N/A	PPAS0B04980	N/A	N/A	616	N/A	N/A	N/A	N/A	N/A	Y	N	N/A	N/A	N	N/A	N/A	N/A	N/A	N/A	N/A	N/A	0	no	-0.658361	no	N/A	N/A	N/A	N/A	N/A	N	N/A	N/A	N/A
N/A	N/A	PPAS0B04990	N/A	N/A	617	N/A	N/A	N/A	N/A	N/A	Y	N	N/A	N/A	N	N/A	N/A	N/A	N/A	N/A	N/A	N/A	0	no	-0.658361	no	N/A	N/A	N/A	N/A	N/A	N	N/A	N/A	N/A
N/A	N/A	PPAS0B05020	N/A	N/A	618	N/A	N/A	N/A	N/A	N/A	N	N	N/A	N/A	N	N/A	N/A	N/A	N/A	N/A	N/A	N/A	N/A	N/A	N/A	N/A	N/A	N/A	N/A	N/A	N/A	N	N/A	N/A	N/A
N/A	N/A	PPAS0B05030	N/A	N/A	619	N/A	N/A	N/A	N/A	N/A	N	N	N/A	N/A	N	N/A	N/A	N/A	N/A	N/A	N/A	N/A	1.91601	yes	-0.74697	yes	N/A	N/A	N/A	N/A	N/A	N	N/A	N/A	N/A
N/A	N/A	PPAS0B05040	N/A	N/A	620	N/A	N/A	N/A	N/A	N/A	Y	N	N/A	N/A	N	N/A	N/A	N/A	N/A	N/A	N/A	N/A	1.29487	yes	-1.51964	yes	N/A	N/A	N/A	N/A	N/A	Y	N/A	N/A	N/A
N/A	N/A	PPAS0B05130	N/A	N/A	621	N/A	N/A	N/A	N/A	N/A	N	N	N/A	N/A	N	N/A	N/A	N/A	N/A	N/A	N/A	N/A	N/A	N/A	N/A	N/A	N/A	N/A	N/A	N/A	N/A	Y	N/A	N/A	N/A
N/A	N/A	PPAS0B05140	N/A	N/A	622	N/A	N/A	N/A	N/A	N/A	N	N	N/A	N/A	N	N/A	N/A	N/A	N/A	N/A	N/A	N/A	N/A	N/A	N/A	N/A	N/A	N/A	N/A	N/A	N/A	N	N/A	N/A	N/A
N/A	N/A	PPAS0B05180	N/A	N/A	623	N/A	N/A	N/A	N/A	N/A	N	N	N/A	N/A	N	N/A	N/A	N/A	N/A	N/A	N/A	N/A	6.03955	yes	0.0765636	no	N/A	N/A	N/A	N/A	N/A	N	N/A	N/A	N/A
N/A	N/A	PPAS0B05240	N/A	N/A	624	N/A	N/A	N/A	N/A	N/A	N	N	N/A	N/A	N	N/A	N/A	N/A	N/A	N/A	N/A	N/A	3.66288	yes	0.426999	no	N/A	N/A	N/A	N/A	N/A	N	N/A	N/A	N/A
N/A	N/A	PPAS0B05250	N/A	N/A	625	N/A	N/A	N/A	N/A	N/A	N	N	N/A	N/A	N	N/A	N/A	N/A	N/A	N/A	N/A	N/A	-2.30812	yes	0.19157	no	N/A	N/A	N/A	N/A	N/A	N	N/A	N/A	N/A
N/A	N/A	PPAS0B05310	N/A	N/A	626	N/A	N/A	N/A	N/A	N/A	N	N	N/A	N/A	N	N/A	N/A	N/A	N/A	N/A	N/A	N/A	-0.599587	no	0.272564	no	N/A	N/A	N/A	N/A	N/A	N	N/A	N/A	N/A
N/A	N/A	PPAS0B05360	N/A	N/A	627	N/A	N/A	N/A	N/A	N/A	Y	N	N/A	N/A	N	N/A	N/A	N/A	N/A	N/A	N/A	N/A	N/A	N/A	N/A	N/A	N/A	N/A	N/A	N/A	N/A	N	N/A	N/A	N/A
N/A	N/A	PPAS0B05380	N/A	N/A	628	N/A	N/A	N/A	N/A	N/A	N	N	N/A	N/A	N	N/A	N/A	N/A	N/A	N/A	N/A	N/A	0.0646067	no	0.262023	no	N/A	N/A	N/A	N/A	N/A	N	N/A	N/A	N/A
N/A	N/A	PPAS0B05440	N/A	N/A	629	N/A	N/A	N/A	N/A	N/A	N	N	N/A	N/A	N	N/A	N/A	N/A	N/A	N/A	N/A	N/A	0.210173	no	0.298477	no	N/A	N/A	N/A	N/A	N/A	N	N/A	N/A	N/A
N/A	N/A	PPAS0B05560	N/A	N/A	630	N/A	N/A	N/A	N/A	N/A	N	N	N/A	N/A	N	N/A	N/A	N/A	N/A	N/A	N/A	N/A	2.87482	yes	-2.19891	yes	N/A	N/A	N/A	N/A	N/A	Y	N/A	N/A	N/A
N/A	N/A	PPAS0B05600	N/A	N/A	631	N/A	N/A	N/A	N/A	N/A	N	N	N/A	N/A	N	N/A	N/A	N/A	N/A	N/A	N/A	N/A	-0.910304	no	0.12877	no	N/A	N/A	N/A	N/A	N/A	N	N/A	N/A	N/A
N/A	N/A	PPAS0B05630	N/A	N/A	632	N/A	N/A	N/A	N/A	N/A	N	N	N/A	N/A	N	N/A	N/A	N/A	N/A	N/A	N/A	N/A	-0.445134	no	0.0797376	no	N/A	N/A	N/A	N/A	N/A	N	N/A	N/A	N/A
N/A	N/A	PPAS0B05650	N/A	N/A	633	N/A	N/A	N/A	N/A	N/A	N	N	N/A	N/A	N	N/A	N/A	N/A	N/A	N/A	N/A	N/A	2.32885	yes	-1.55076	yes	N/A	N/A	N/A	N/A	N/A	N	N/A	N/A	N/A
N/A	N/A	PPAS0B05690	N/A	N/A	634	N/A	N/A	N/A	N/A	N/A	Y	N	N/A	N/A	N	N/A	N/A	N/A	N/A	N/A	N/A	N/A	N/A	N/A	N/A	N/A	N/A	N/A	N/A	N/A	N/A	N	N/A	N/A	N/A
N/A	N/A	PPAS0B05710	N/A	N/A	635	N/A	N/A	N/A	N/A	N/A	N	N	N/A	N/A	N	N/A	N/A	N/A	N/A	N/A	N/A	N/A	-0.0279207	no	0.351081	no	N/A	N/A	N/A	N/A	N/A	Y	N/A	N/A	N/A
N/A	N/A	PPAS0B05730	N/A	N/A	636	N/A	N/A	N/A	N/A	N/A	N	N	N/A	N/A	N	N/A	N/A	N/A	N/A	N/A	N/A	N/A	-1.51638	yes	0.197914	no	N/A	N/A	N/A	N/A	N/A	N	N/A	N/A	N/A
N/A	N/A	PPAS0B05770	N/A	N/A	637	N/A	N/A	N/A	N/A	N/A	N	N	N/A	N/A	N	N/A	N/A	N/A	N/A	N/A	N/A	N/A	0.292973	no	0.379761	no	N/A	N/A	N/A	N/A	N/A	N	N/A	N/A	N/A
N/A	N/A	PPAS0B05830	N/A	N/A	638	N/A	N/A	N/A	N/A	N/A	N	N	N/A	N/A	N	N/A	N/A	N/A	N/A	N/A	N/A	N/A	N/A	N/A	N/A	N/A	N/A	N/A	N/A	N/A	N/A	N	N/A	N/A	N/A
N/A	N/A	PPAS0B05850	N/A	N/A	639	N/A	N/A	N/A	N/A	N/A	N	N	N/A	N/A	N	N/A	N/A	N/A	N/A	N/A	N/A	N/A	N/A	N/A	N/A	N/A	N/A	N/A	N/A	N/A	N/A	N	N/A	N/A	N/A
N/A	N/A	PPAS0B05900	N/A	N/A	640	N/A	N/A	N/A	N/A	N/A	Y	N	N/A	N/A	N	N/A	N/A	N/A	N/A	N/A	N/A	N/A	1.69015	yes	-0.850567	no	N/A	N/A	N/A	N/A	N/A	N	N/A	N/A	N/A
N/A	N/A	PPAS0B05980	N/A	N/A	641	N/A	N/A	N/A	N/A	N/A	N	N	N/A	N/A	N	N/A	N/A	N/A	N/A	N/A	N/A	N/A	-0.721267	no	-0.19769	no	N/A	N/A	N/A	N/A	N/A	Y	N/A	N/A	N/A
N/A	N/A	PPAS0B05990	N/A	N/A	642	N/A	N/A	N/A	N/A	N/A	N	N	N/A	N/A	N	N/A	N/A	N/A	N/A	N/A	N/A	N/A	0.322539	no	-0.253706	no	N/A	N/A	N/A	N/A	N/A	Y	N/A	N/A	N/A
N/A	N/A	PPAS0B06000	N/A	N/A	643	N/A	N/A	N/A	N/A	N/A	N	N	N/A	N/A	N	N/A	N/A	N/A	N/A	N/A	N/A	N/A	-1.10214	no	0.172656	no	N/A	N/A	N/A	N/A	N/A	Y	N/A	N/A	N/A
N/A	N/A	PPAS0B06060	N/A	N/A	644	N/A	N/A	N/A	N/A	N/A	N	N	N/A	N/A	N	N/A	N/A	N/A	N/A	N/A	N/A	N/A	-1.16458	no	0.231635	no	N/A	N/A	N/A	N/A	N/A	N	N/A	N/A	N/A
N/A	N/A	PPAS0B06070	N/A	N/A	645	N/A	N/A	N/A	N/A	N/A	N	N	N/A	N/A	N	N/A	N/A	N/A	N/A	N/A	N/A	N/A	-0.348832	no	-0.0439669	no	N/A	N/A	N/A	N/A	N/A	N	N/A	N/A	N/A
N/A	N/A	PPAS0B06080	N/A	N/A	646	N/A	N/A	N/A	N/A	N/A	Y	N	N/A	N/A	N	N/A	N/A	N/A	N/A	N/A	N/A	N/A	-0.348832	no	-0.0439669	no	N/A	N/A	N/A	N/A	N/A	N	N/A	N/A	N/A
N/A	N/A	PPAS0B06110	N/A	N/A	647	N/A	N/A	N/A	N/A	N/A	N	N	N/A	N/A	N	N/A	N/A	N/A	N/A	N/A	N/A	N/A	-0.348832	no	-0.0439669	no	N/A	N/A	N/A	N/A	N/A	N	N/A	N/A	N/A
N/A	N/A	PPAS0B06150	N/A	N/A	648	N/A	N/A	N/A	N/A	N/A	Y	N	N/A	N/A	N	N/A	N/A	N/A	N/A	N/A	N/A	N/A	-0.587028	no	-0.221375	no	N/A	N/A	N/A	N/A	N/A	N	N/A	N/A	N/A
N/A	N/A	PPAS0B06170	N/A	N/A	649	N/A	N/A	N/A	N/A	N/A	Y	N	N/A	N/A	N	N/A	N/A	N/A	N/A	N/A	N/A	N/A	N/A	N/A	N/A	N/A	N/A	N/A	N/A	N/A	N/A	Y	N/A	N/A	N/A
N/A	N/A	PPAS0B06220	N/A	N/A	650	N/A	N/A	N/A	N/A	N/A	Y	N	N/A	N/A	N	N/A	N/A	N/A	N/A	N/A	N/A	N/A	N/A	N/A	N/A	N/A	N/A	N/A	N/A	N/A	N/A	N	N/A	N/A	N/A
N/A	N/A	PPAS0B06240	N/A	N/A	651	N/A	N/A	N/A	N/A	N/A	N	N	N/A	N/A	N	N/A	N/A	N/A	N/A	N/A	N/A	N/A	1.77973	yes	-1.82493	yes	N/A	N/A	N/A	N/A	N/A	N	N/A	N/A	N/A
N/A	N/A	PPAS0B06270	N/A	N/A	652	N/A	N/A	N/A	N/A	N/A	N	N	N/A	N/A	N	N/A	N/A	N/A	N/A	N/A	N/A	N/A	N/A	N/A	N/A	N/A	N/A	N/A	N/A	N/A	N/A	N	N/A	N/A	N/A
N/A	N/A	PPAS0B06280	N/A	N/A	653	N/A	N/A	N/A	N/A	N/A	N	N	N/A	N/A	N	N/A	N/A	N/A	N/A	N/A	N/A	N/A	N/A	N/A	N/A	N/A	N/A	N/A	N/A	N/A	N/A	N	N/A	N/A	N/A
N/A	N/A	PPAS0B06300	N/A	N/A	654	N/A	N/A	N/A	N/A	N/A	N	N	N/A	N/A	N	N/A	N/A	N/A	N/A	N/A	N/A	N/A	-0.780116	no	0.547202	no	N/A	N/A	N/A	N/A	N/A	N	N/A	N/A	N/A
N/A	N/A	PPAS0B06350	N/A	N/A	655	N/A	N/A	N/A	N/A	N/A	Y	N	N/A	N/A	N	N/A	N/A	N/A	N/A	N/A	N/A	N/A	0.221824	no	-0.525961	no	N/A	N/A	N/A	N/A	N/A	N	N/A	N/A	N/A
N/A	N/A	PPAS0B06360	N/A	N/A	656	N/A	N/A	N/A	N/A	N/A	Y	N	N/A	N/A	N	N/A	N/A	N/A	N/A	N/A	N/A	N/A	0.882339	yes	0.179741	no	N/A	N/A	N/A	N/A	N/A	Y	N/A	N/A	N/A
N/A	N/A	PPAS0B06370	N/A	N/A	657	N/A	N/A	N/A	N/A	N/A	Y	N	N/A	N/A	N	N/A	N/A	N/A	N/A	N/A	N/A	N/A	2.39021	yes	-0.309167	no	N/A	N/A	N/A	N/A	N/A	Y	N/A	N/A	N/A
N/A	N/A	PPAS0B06380	N/A	N/A	658	N/A	N/A	N/A	N/A	N/A	Y	N	N/A	N/A	N	N/A	N/A	N/A	N/A	N/A	N/A	N/A	0.899723	yes	-0.756489	yes	N/A	N/A	N/A	N/A	N/A	Y	N/A	N/A	N/A
N/A	N/A	PPAS0B06390	N/A	N/A	659	N/A	N/A	N/A	N/A	N/A	Y	N	N/A	N/A	N	N/A	N/A	N/A	N/A	N/A	N/A	N/A	-2.24141	yes	0.0607731	no	N/A	N/A	N/A	N/A	N/A	Y	N/A	N/A	N/A
N/A	N/A	PPAS0B06430	N/A	N/A	660	N/A	N/A	N/A	N/A	N/A	Y	N	N/A	N/A	N	N/A	N/A	N/A	N/A	N/A	N/A	N/A	0.0557583	no	0.0508352	no	N/A	N/A	N/A	N/A	N/A	Y	N/A	N/A	N/A
N/A	N/A	PPAS0B06440	N/A	N/A	661	N/A	N/A	N/A	N/A	N/A	Y	N	N/A	N/A	N	N/A	N/A	N/A	N/A	N/A	N/A	N/A	0.0557583	no	0.0508352	no	N/A	N/A	N/A	N/A	N/A	Y	N/A	N/A	N/A
N/A	N/A	PPAS0B06450	N/A	N/A	662	N/A	N/A	N/A	N/A	N/A	N	N	N/A	N/A	N	N/A	N/A	N/A	N/A	N/A	N/A	N/A	0.0557583	no	0.0508352	no	N/A	N/A	N/A	N/A	N/A	N	N/A	N/A	N/A
N/A	N/A	PPAS0B06480	N/A	N/A	663	N/A	N/A	N/A	N/A	N/A	N	N	N/A	N/A	N	N/A	N/A	N/A	N/A	N/A	N/A	N/A	1.18674	no	0.0229363	no	N/A	N/A	N/A	N/A	N/A	N	N/A	N/A	N/A
N/A	N/A	PPAS0B06490	N/A	N/A	664	N/A	N/A	N/A	N/A	N/A	N	N	N/A	N/A	N	N/A	N/A	N/A	N/A	N/A	N/A	N/A	1.59509	yes	0.488898	no	N/A	N/A	N/A	N/A	N/A	N	N/A	N/A	N/A
N/A	N/A	PPAS0B06530	N/A	N/A	665	N/A	N/A	N/A	N/A	N/A	Y	N	N/A	N/A	N	N/A	N/A	N/A	N/A	N/A	N/A	N/A	0.830636	yes	0.0334114	no	N/A	N/A	N/A	N/A	N/A	Y	N/A	N/A	N/A
N/A	N/A	PPAS0B06540	N/A	N/A	666	N/A	N/A	N/A	N/A	N/A	N	N	N/A	N/A	N	N/A	N/A	N/A	N/A	N/A	N/A	N/A	1.16131	yes	-0.495433	no	N/A	N/A	N/A	N/A	N/A	N	N/A	N/A	N/A
N/A	N/A	PPAS0B06550	N/A	N/A	667	N/A	N/A	N/A	N/A	N/A	Y	N	N/A	N/A	N	N/A	N/A	N/A	N/A	N/A	N/A	N/A	N/A	N/A	N/A	N/A	N/A	N/A	N/A	N/A	N/A	N	N/A	N/A	N/A
N/A	N/A	PPAS0B06560	N/A	N/A	668	N/A	N/A	N/A	N/A	N/A	N	N	N/A	N/A	N	N/A	N/A	N/A	N/A	N/A	N/A	N/A	-0.160328	no	0.457425	no	N/A	N/A	N/A	N/A	N/A	N	N/A	N/A	N/A
N/A	N/A	PPAS0B06570	N/A	N/A	669	N/A	N/A	N/A	N/A	N/A	N	N	N/A	N/A	N	N/A	N/A	N/A	N/A	N/A	N/A	N/A	N/A	N/A	N/A	N/A	N/A	N/A	N/A	N/A	N/A	N	N/A	N/A	N/A
N/A	N/A	PPAS0B06610	N/A	N/A	670	N/A	N/A	N/A	N/A	N/A	N	N	N/A	N/A	N	N/A	N/A	N/A	N/A	N/A	N/A	N/A	0.0799661	no	0.156405	no	N/A	N/A	N/A	N/A	N/A	Y	N/A	N/A	N/A
N/A	N/A	PPAS0B06680	N/A	N/A	671	N/A	N/A	N/A	N/A	N/A	Y	N	N/A	N/A	N	N/A	N/A	N/A	N/A	N/A	N/A	N/A	-0.474972	no	-0.225122	no	N/A	N/A	N/A	N/A	N/A	Y	N/A	N/A	N/A
N/A	N/A	PPAS0B06690	N/A	N/A	672	N/A	N/A	N/A	N/A	N/A	N	N	N/A	N/A	N	N/A	N/A	N/A	N/A	N/A	N/A	N/A	N/A	N/A	N/A	N/A	N/A	N/A	N/A	N/A	N/A	N	N/A	N/A	N/A
N/A	N/A	PPAS0B06730	N/A	N/A	673	N/A	N/A	N/A	N/A	N/A	N	N	N/A	N/A	N	N/A	N/A	N/A	N/A	N/A	N/A	N/A	-0.876216	no	0.177746	no	N/A	N/A	N/A	N/A	N/A	N	N/A	N/A	N/A
N/A	N/A	PPAS0B06790	N/A	N/A	674	N/A	N/A	N/A	N/A	N/A	N	N	N/A	N/A	N	N/A	N/A	N/A	N/A	N/A	N/A	N/A	-1.45374	yes	0.315562	no	N/A	N/A	N/A	N/A	N/A	N	N/A	N/A	N/A
N/A	N/A	PPAS0B06830	N/A	N/A	675	N/A	N/A	N/A	N/A	N/A	N	N	N/A	N/A	N	N/A	N/A	N/A	N/A	N/A	N/A	N/A	-0.703038	yes	0.193118	no	N/A	N/A	N/A	N/A	N/A	N	N/A	N/A	N/A
N/A	N/A	PPAS0B06850	N/A	N/A	676	N/A	N/A	N/A	N/A	N/A	N	N	N/A	N/A	N	N/A	N/A	N/A	N/A	N/A	N/A	N/A	-1.58468	yes	0.332133	no	N/A	N/A	N/A	N/A	N/A	N	N/A	N/A	N/A
N/A	N/A	PPAS0B06900	N/A	N/A	677	N/A	N/A	N/A	N/A	N/A	N/A	N	N/A	N/A	N	N/A	N/A	N/A	N/A	N/A	N/A	N/A	N/A	N/A	N/A	N/A	N/A	N/A	N/A	N/A	N/A	N/A	N/A	N/A	N/A
N/A	N/A	PPAS0B06960	N/A	N/A	678	N/A	N/A	N/A	N/A	N/A	N	N	N/A	N/A	N	N/A	N/A	N/A	N/A	N/A	N/A	N/A	1.74227	yes	-0.278454	no	N/A	N/A	N/A	N/A	N/A	N	N/A	N/A	N/A
N/A	N/A	PPAS0B06980	N/A	N/A	679	N/A	N/A	N/A	N/A	N/A	N	N	N/A	N/A	N	N/A	N/A	N/A	N/A	N/A	N/A	N/A	-1.06452	yes	-0.0903842	no	N/A	N/A	N/A	N/A	N/A	Y	N/A	N/A	N/A
N/A	N/A	PPAS0B07020	N/A	N/A	680	N/A	N/A	N/A	N/A	N/A	N	N	N/A	N/A	N	N/A	N/A	N/A	N/A	N/A	N/A	N/A	2.5436	yes	0.818984	yes	N/A	N/A	N/A	N/A	N/A	N	N/A	N/A	N/A
N/A	N/A	PPAS0B07050	N/A	N/A	681	N/A	N/A	N/A	N/A	N/A	N	N	N/A	N/A	N	N/A	N/A	N/A	N/A	N/A	N/A	N/A	2.40501	no	-0.0560865	no	N/A	N/A	N/A	N/A	N/A	N	N/A	N/A	N/A
N/A	N/A	PPAS0B07070	N/A	N/A	682	N/A	N/A	N/A	N/A	N/A	N	N	N/A	N/A	N	N/A	N/A	N/A	N/A	N/A	N/A	N/A	2.15669	yes	0.165065	no	N/A	N/A	N/A	N/A	N/A	N	N/A	N/A	N/A
N/A	N/A	PPAS0B07090	N/A	N/A	683	N/A	N/A	N/A	N/A	N/A	N	N	N/A	N/A	N	N/A	N/A	N/A	N/A	N/A	N/A	N/A	N/A	N/A	N/A	N/A	N/A	N/A	N/A	N/A	N/A	N	N/A	N/A	N/A
N/A	N/A	PPAS0B07150	N/A	N/A	684	N/A	N/A	N/A	N/A	N/A	N	N	N/A	N/A	N	N/A	N/A	N/A	N/A	N/A	N/A	N/A	N/A	N/A	N/A	N/A	N/A	N/A	N/A	N/A	N/A	N	N/A	N/A	N/A
N/A	N/A	PPAS0B07190	N/A	N/A	685	N/A	N/A	N/A	N/A	N/A	N	N	N/A	N/A	N	N/A	N/A	N/A	N/A	N/A	N/A	N/A	-1.20427	yes	0.25794	no	N/A	N/A	N/A	N/A	N/A	N	N/A	N/A	N/A
N/A	N/A	PPAS0B07200	N/A	N/A	686	N/A	N/A	N/A	N/A	N/A	Y	N	N/A	N/A	N	N/A	N/A	N/A	N/A	N/A	N/A	N/A	N/A	N/A	N/A	N/A	N/A	N/A	N/A	N/A	N/A	N	N/A	N/A	N/A
N/A	N/A	PPAS0B07220	N/A	N/A	687	N/A	N/A	N/A	N/A	N/A	N	N	N/A	N/A	N	N/A	N/A	N/A	N/A	N/A	N/A	N/A	N/A	N/A	N/A	N/A	N/A	N/A	N/A	N/A	N/A	N	N/A	N/A	N/A
N/A	N/A	PPAS0B07240	N/A	N/A	688	N/A	N/A	N/A	N/A	N/A	Y	N	N/A	N/A	N	N/A	N/A	N/A	N/A	N/A	N/A	N/A	N/A	N/A	N/A	N/A	N/A	N/A	N/A	N/A	N/A	Y	N/A	N/A	N/A
N/A	N/A	PPAS0B07340	N/A	N/A	689	N/A	N/A	N/A	N/A	N/A	Y	N	N/A	N/A	N	N/A	N/A	N/A	N/A	N/A	N/A	N/A	N/A	N/A	N/A	N/A	N/A	N/A	N/A	N/A	N/A	Y	N/A	N/A	N/A
N/A	N/A	PPAS0B07360	N/A	N/A	690	N/A	N/A	N/A	N/A	N/A	N	N	N/A	N/A	N	N/A	N/A	N/A	N/A	N/A	N/A	N/A	-0.0800136	no	0.184773	no	N/A	N/A	N/A	N/A	N/A	N	N/A	N/A	N/A
N/A	N/A	PPAS0B07380	N/A	N/A	691	N/A	N/A	N/A	N/A	N/A	N	N	N/A	N/A	N	N/A	N/A	N/A	N/A	N/A	N/A	N/A	N/A	N/A	N/A	N/A	N/A	N/A	N/A	N/A	N/A	N	N/A	N/A	N/A
N/A	N/A	PPAS0B07390	N/A	N/A	692	N/A	N/A	N/A	N/A	N/A	N	N	N/A	N/A	N	N/A	N/A	N/A	N/A	N/A	N/A	N/A	N/A	N/A	N/A	N/A	N/A	N/A	N/A	N/A	N/A	N	N/A	N/A	N/A
N/A	N/A	PPAS0B07400	N/A	N/A	693	N/A	N/A	N/A	N/A	N/A	N	N	N/A	N/A	N	N/A	N/A	N/A	N/A	N/A	N/A	N/A	N/A	N/A	N/A	N/A	N/A	N/A	N/A	N/A	N/A	N	N/A	N/A	N/A
N/A	N/A	PPAS0B07410	N/A	N/A	694	N/A	N/A	N/A	N/A	N/A	N	N	N/A	N/A	N	N/A	N/A	N/A	N/A	N/A	N/A	N/A	-2.22002	no	0.323662	no	N/A	N/A	N/A	N/A	N/A	N	N/A	N/A	N/A
N/A	N/A	PPAS0B07450	N/A	N/A	695	N/A	N/A	N/A	N/A	N/A	Y	N	N/A	N/A	N	N/A	N/A	N/A	N/A	N/A	N/A	N/A	3.30262	yes	-1.902	yes	N/A	N/A	N/A	N/A	N/A	Y	N/A	N/A	N/A
N/A	N/A	PPAS0B07480	N/A	N/A	696	N/A	N/A	N/A	N/A	N/A	N	N	N/A	N/A	N	N/A	N/A	N/A	N/A	N/A	N/A	N/A	-0.855948	yes	0.320917	no	N/A	N/A	N/A	N/A	N/A	N	N/A	N/A	N/A
N/A	N/A	PPAS0B07490	N/A	N/A	697	N/A	N/A	N/A	N/A	N/A	Y	N	N/A	N/A	N	N/A	N/A	N/A	N/A	N/A	N/A	N/A	N/A	N/A	N/A	N/A	N/A	N/A	N/A	N/A	N/A	Y	N/A	N/A	N/A
N/A	N/A	PPAS0B07500	N/A	N/A	698	N/A	N/A	N/A	N/A	N/A	N	N	N/A	N/A	N	N/A	N/A	N/A	N/A	N/A	N/A	N/A	2.69818	yes	-0.684447	yes	N/A	N/A	N/A	N/A	N/A	N	N/A	N/A	N/A
N/A	N/A	PPAS0B07530	N/A	N/A	699	N/A	N/A	N/A	N/A	N/A	N	N	N/A	N/A	N	N/A	N/A	N/A	N/A	N/A	N/A	N/A	1.18393	yes	-1.11157	yes	N/A	N/A	N/A	N/A	N/A	N	N/A	N/A	N/A
N/A	N/A	PPAS0B07540	N/A	N/A	700	N/A	N/A	N/A	N/A	N/A	N	N	N/A	N/A	N	N/A	N/A	N/A	N/A	N/A	N/A	N/A	N/A	N/A	N/A	N/A	N/A	N/A	N/A	N/A	N/A	Y	N/A	N/A	N/A
N/A	N/A	PPAS0B07560	N/A	N/A	701	N/A	N/A	N/A	N/A	N/A	N	N	N/A	N/A	N	N/A	N/A	N/A	N/A	N/A	N/A	N/A	3.61318	yes	-0.102146	no	N/A	N/A	N/A	N/A	N/A	N	N/A	N/A	N/A
N/A	N/A	PPAS0B07590	N/A	N/A	702	N/A	N/A	N/A	N/A	N/A	N	N	N/A	N/A	N	N/A	N/A	N/A	N/A	N/A	N/A	N/A	1.97682	yes	-0.217664	no	N/A	N/A	N/A	N/A	N/A	N	N/A	N/A	N/A
N/A	N/A	PPAS0B07660	N/A	N/A	703	N/A	N/A	N/A	N/A	N/A	N	N	N/A	N/A	N	N/A	N/A	N/A	N/A	N/A	N/A	N/A	N/A	N/A	N/A	N/A	N/A	N/A	N/A	N/A	N/A	N	N/A	N/A	N/A
N/A	N/A	PPAS0B07670	N/A	N/A	704	N/A	N/A	N/A	N/A	N/A	N	N	N/A	N/A	N	N/A	N/A	N/A	N/A	N/A	N/A	N/A	1.24315	yes	-0.0174956	no	N/A	N/A	N/A	N/A	N/A	N	N/A	N/A	N/A
N/A	N/A	PPAS0B07740	N/A	N/A	705	N/A	N/A	N/A	N/A	N/A	N	N	N/A	N/A	N	N/A	N/A	N/A	N/A	N/A	N/A	N/A	-0.415816	no	0.328789	no	N/A	N/A	N/A	N/A	N/A	N	N/A	N/A	N/A
N/A	N/A	PPAS0B07770	N/A	N/A	706	N/A	N/A	N/A	N/A	N/A	N	N	N/A	N/A	N	N/A	N/A	N/A	N/A	N/A	N/A	N/A	1.18716	yes	-0.301834	no	N/A	N/A	N/A	N/A	N/A	N	N/A	N/A	N/A
N/A	N/A	PPAS0B07780	N/A	N/A	707	N/A	N/A	N/A	N/A	N/A	Y	N	N/A	N/A	N	N/A	N/A	N/A	N/A	N/A	N/A	N/A	0.52239	no	-0.183402	no	N/A	N/A	N/A	N/A	N/A	N	N/A	N/A	N/A
N/A	N/A	PPAS0B07790	N/A	N/A	708	N/A	N/A	N/A	N/A	N/A	Y	N	N/A	N/A	N	N/A	N/A	N/A	N/A	N/A	N/A	N/A	-1.85996	yes	0.272312	no	N/A	N/A	N/A	N/A	N/A	N	N/A	N/A	N/A
N/A	N/A	PPAS0B07830	N/A	N/A	709	N/A	N/A	N/A	N/A	N/A	Y	N	N/A	N/A	N	N/A	N/A	N/A	N/A	N/A	N/A	N/A	N/A	N/A	N/A	N/A	N/A	N/A	N/A	N/A	N/A	N	N/A	N/A	N/A
N/A	N/A	PPAS0B07940	N/A	N/A	710	N/A	N/A	N/A	N/A	N/A	N	N	N/A	N/A	N	N/A	N/A	N/A	N/A	N/A	N/A	N/A	N/A	N/A	N/A	N/A	N/A	N/A	N/A	N/A	N/A	N	N/A	N/A	N/A
N/A	N/A	PPAS0B07950	N/A	N/A	711	N/A	N/A	N/A	N/A	N/A	N	N	N/A	N/A	N	N/A	N/A	N/A	N/A	N/A	N/A	N/A	0.71214	yes	0.480378	no	N/A	N/A	N/A	N/A	N/A	N	N/A	N/A	N/A
N/A	N/A	PPAS0B07960	N/A	N/A	712	N/A	N/A	N/A	N/A	N/A	Y	N	N/A	N/A	N	N/A	N/A	N/A	N/A	N/A	N/A	N/A	1.68865	yes	-0.0529635	no	N/A	N/A	N/A	N/A	N/A	Y	N/A	N/A	N/A
N/A	N/A	PPAS0B07970	N/A	N/A	713	N/A	N/A	N/A	N/A	N/A	Y	N	N/A	N/A	N	N/A	N/A	N/A	N/A	N/A	N/A	N/A	-0.268687	no	-0.0475437	no	N/A	N/A	N/A	N/A	N/A	Y	N/A	N/A	N/A
N/A	N/A	PPAS0B07990	N/A	N/A	714	N/A	N/A	N/A	N/A	N/A	N	N	N/A	N/A	N	N/A	N/A	N/A	N/A	N/A	N/A	N/A	-1.83444	yes	0.120685	no	N/A	N/A	N/A	N/A	N/A	N	N/A	N/A	N/A
N/A	N/A	PPAS0B08030	N/A	N/A	715	N/A	N/A	N/A	N/A	N/A	N	N	N/A	N/A	N	N/A	N/A	N/A	N/A	N/A	N/A	N/A	-0.864962	yes	0.269305	no	N/A	N/A	N/A	N/A	N/A	Y	N/A	N/A	N/A
N/A	N/A	PPAS0B08040	N/A	N/A	716	N/A	N/A	N/A	N/A	N/A	N	N	N/A	N/A	N	N/A	N/A	N/A	N/A	N/A	N/A	N/A	1.24166	yes	0.0551066	no	N/A	N/A	N/A	N/A	N/A	Y	N/A	N/A	N/A
N/A	N/A	PPAS0B08100	N/A	N/A	717	N/A	N/A	N/A	N/A	N/A	Y	N	N/A	N/A	N	N/A	N/A	N/A	N/A	N/A	N/A	N/A	N/A	N/A	N/A	N/A	N/A	N/A	N/A	N/A	N/A	Y	N/A	N/A	N/A
N/A	N/A	PPAS0B08110	N/A	N/A	718	N/A	N/A	N/A	N/A	N/A	Y	N	N/A	N/A	N	N/A	N/A	N/A	N/A	N/A	N/A	N/A	N/A	N/A	N/A	N/A	N/A	N/A	N/A	N/A	N/A	Y	N/A	N/A	N/A
N/A	N/A	PPAS0B08160	N/A	N/A	719	N/A	N/A	N/A	N/A	N/A	Y	N	N/A	N/A	N	N/A	N/A	N/A	N/A	N/A	N/A	N/A	1.49323	yes	-2.30694	yes	N/A	N/A	N/A	N/A	N/A	N	N/A	N/A	N/A
N/A	N/A	PPAS0B08170	N/A	N/A	720	N/A	N/A	N/A	N/A	N/A	N	N	N/A	N/A	N	N/A	N/A	N/A	N/A	N/A	N/A	N/A	N/A	N/A	N/A	N/A	N/A	N/A	N/A	N/A	N/A	Y	N/A	N/A	N/A
N/A	N/A	PPAS0B08250	N/A	N/A	721	N/A	N/A	N/A	N/A	N/A	N	N	N/A	N/A	N	N/A	N/A	N/A	N/A	N/A	N/A	N/A	-0.162237	no	0.0430055	no	N/A	N/A	N/A	N/A	N/A	N	N/A	N/A	N/A
N/A	N/A	PPAS0B08270	N/A	N/A	722	N/A	N/A	N/A	N/A	N/A	N	N	N/A	N/A	N	N/A	N/A	N/A	N/A	N/A	N/A	N/A	N/A	N/A	N/A	N/A	N/A	N/A	N/A	N/A	N/A	N	N/A	N/A	N/A
N/A	N/A	PPAS0B08290	N/A	N/A	723	N/A	N/A	N/A	N/A	N/A	N	N	N/A	N/A	N	N/A	N/A	N/A	N/A	N/A	N/A	N/A	-1.12534	yes	0.163401	no	N/A	N/A	N/A	N/A	N/A	N	N/A	N/A	N/A
N/A	N/A	PPAS0B08320	N/A	N/A	724	N/A	N/A	N/A	N/A	N/A	N	N	N/A	N/A	N	N/A	N/A	N/A	N/A	N/A	N/A	N/A	-2.48653	yes	-0.0459101	no	N/A	N/A	N/A	N/A	N/A	N	N/A	N/A	N/A
N/A	N/A	PPAS0B08330	N/A	N/A	725	N/A	N/A	N/A	N/A	N/A	N	N	N/A	N/A	N	N/A	N/A	N/A	N/A	N/A	N/A	N/A	-0.374491	no	0.134973	no	N/A	N/A	N/A	N/A	N/A	N	N/A	N/A	N/A
N/A	N/A	PPAS0B08380	N/A	N/A	726	N/A	N/A	N/A	N/A	N/A	N	N	N/A	N/A	N	N/A	N/A	N/A	N/A	N/A	N/A	N/A	1.74712	no	0.262031	no	N/A	N/A	N/A	N/A	N/A	N	N/A	N/A	N/A
N/A	N/A	PPAS0B08390	N/A	N/A	727	N/A	N/A	N/A	N/A	N/A	N	N	N/A	N/A	N	N/A	N/A	N/A	N/A	N/A	N/A	N/A	1.74712	no	0.262031	no	N/A	N/A	N/A	N/A	N/A	N	N/A	N/A	N/A
N/A	N/A	PPAS0B08400	N/A	N/A	728	N/A	N/A	N/A	N/A	N/A	Y	N	N/A	N/A	N	N/A	N/A	N/A	N/A	N/A	N/A	N/A	-0.231941	no	0.435577	no	N/A	N/A	N/A	N/A	N/A	N	N/A	N/A	N/A
N/A	N/A	PPAS0B08410	N/A	N/A	729	N/A	N/A	N/A	N/A	N/A	Y	N	N/A	N/A	N	N/A	N/A	N/A	N/A	N/A	N/A	N/A	-0.200364	no	0.171164	no	N/A	N/A	N/A	N/A	N/A	N	N/A	N/A	N/A
N/A	N/A	PPAS0B08440	N/A	N/A	730	N/A	N/A	N/A	N/A	N/A	N	N	N/A	N/A	N	N/A	N/A	N/A	N/A	N/A	N/A	N/A	-1.88465	yes	0.187915	no	N/A	N/A	N/A	N/A	N/A	N	N/A	N/A	N/A
N/A	N/A	PPAS0B08470	N/A	N/A	731	N/A	N/A	N/A	N/A	N/A	Y	N	N/A	N/A	N	N/A	N/A	N/A	N/A	N/A	N/A	N/A	0	no	-0.336468	no	N/A	N/A	N/A	N/A	N/A	N	N/A	N/A	N/A
N/A	N/A	PPAS0B08600	N/A	N/A	732	N/A	N/A	N/A	N/A	N/A	Y	N	N/A	N/A	N	N/A	N/A	N/A	N/A	N/A	N/A	N/A	0	no	0	no	N/A	N/A	N/A	N/A	N/A	Y	N/A	N/A	N/A
N/A	N/A	PPAS0B08610	N/A	N/A	733	N/A	N/A	N/A	N/A	N/A	Y	N	N/A	N/A	N	N/A	N/A	N/A	N/A	N/A	N/A	N/A	0	no	0	no	N/A	N/A	N/A	N/A	N/A	Y	N/A	N/A	N/A
N/A	N/A	PPAS0B08620	N/A	N/A	734	N/A	N/A	N/A	N/A	N/A	N	N	N/A	N/A	N	N/A	N/A	N/A	N/A	N/A	N/A	N/A	0	no	0	no	N/A	N/A	N/A	N/A	N/A	N	N/A	N/A	N/A
N/A	N/A	PPAS0B08740	N/A	N/A	735	N/A	N/A	N/A	N/A	N/A	N	N	N/A	N/A	N	N/A	N/A	N/A	N/A	N/A	N/A	N/A	N/A	N/A	N/A	N/A	N/A	N/A	N/A	N/A	N/A	Y	N/A	N/A	N/A
N/A	N/A	PPAS0B08750	N/A	N/A	736	N/A	N/A	N/A	N/A	N/A	N	N	N/A	N/A	N	N/A	N/A	N/A	N/A	N/A	N/A	N/A	N/A	N/A	N/A	N/A	N/A	N/A	N/A	N/A	N/A	N	N/A	N/A	N/A
N/A	N/A	PPAS0B08760	N/A	N/A	737	N/A	N/A	N/A	N/A	N/A	N	N	N/A	N/A	N	N/A	N/A	N/A	N/A	N/A	N/A	N/A	-1.05108	yes	0.447771	no	N/A	N/A	N/A	N/A	N/A	N	N/A	N/A	N/A
N/A	N/A	PPAS0B08780	N/A	N/A	738	N/A	N/A	N/A	N/A	N/A	Y	N	N/A	N/A	N	N/A	N/A	N/A	N/A	N/A	N/A	N/A	N/A	N/A	N/A	N/A	N/A	N/A	N/A	N/A	N/A	N	N/A	N/A	N/A
N/A	N/A	PPAS0B08830	N/A	N/A	739	N/A	N/A	N/A	N/A	N/A	N	N	N/A	N/A	N	N/A	N/A	N/A	N/A	N/A	N/A	N/A	N/A	N/A	N/A	N/A	N/A	N/A	N/A	N/A	N/A	N	N/A	N/A	N/A
N/A	N/A	PPAS0B08860	N/A	N/A	740	N/A	N/A	N/A	N/A	N/A	N	N	N/A	N/A	N	N/A	N/A	N/A	N/A	N/A	N/A	N/A	-0.0875483	no	0.176582	no	N/A	N/A	N/A	N/A	N/A	N	N/A	N/A	N/A
N/A	N/A	PPAS0B08870	N/A	N/A	741	N/A	N/A	N/A	N/A	N/A	Y	N	N/A	N/A	N	N/A	N/A	N/A	N/A	N/A	N/A	N/A	-2.45776	yes	-0.00722589	no	N/A	N/A	N/A	N/A	N/A	Y	N/A	N/A	N/A
N/A	N/A	PPAS0B08890	N/A	N/A	742	N/A	N/A	N/A	N/A	N/A	Y	N	N/A	N/A	N	N/A	N/A	N/A	N/A	N/A	N/A	N/A	-2.03469	yes	0.0722523	no	N/A	N/A	N/A	N/A	N/A	N	N/A	N/A	N/A
N/A	N/A	PPAS0B08900	N/A	N/A	743	N/A	N/A	N/A	N/A	N/A	N	N	N/A	N/A	N	N/A	N/A	N/A	N/A	N/A	N/A	N/A	-0.845572	yes	0.210313	no	N/A	N/A	N/A	N/A	N/A	N	N/A	N/A	N/A
N/A	N/A	PPAS0B08990	N/A	N/A	744	N/A	N/A	N/A	N/A	N/A	Y	N	N/A	N/A	N	N/A	N/A	N/A	N/A	N/A	N/A	N/A	-1.1755	yes	-0.016136	no	N/A	N/A	N/A	N/A	N/A	Y	N/A	N/A	N/A
N/A	N/A	PPAS0B09060	N/A	N/A	745	N/A	N/A	N/A	N/A	N/A	Y	N	N/A	N/A	N	N/A	N/A	N/A	N/A	N/A	N/A	N/A	1.15285	yes	0.0934408	no	N/A	N/A	N/A	N/A	N/A	N	N/A	N/A	N/A
N/A	N/A	PPAS0B09070	N/A	N/A	746	N/A	N/A	N/A	N/A	N/A	Y	N	N/A	N/A	N	N/A	N/A	N/A	N/A	N/A	N/A	N/A	-0.988679	yes	0.104306	no	N/A	N/A	N/A	N/A	N/A	N	N/A	N/A	N/A
N/A	N/A	PPAS0B09150	N/A	N/A	747	N/A	N/A	N/A	N/A	N/A	N	N	N/A	N/A	N	N/A	N/A	N/A	N/A	N/A	N/A	N/A	-0.507139	no	0.393694	no	N/A	N/A	N/A	N/A	N/A	N	N/A	N/A	N/A
N/A	N/A	PPAS0B09230	N/A	N/A	748	N/A	N/A	N/A	N/A	N/A	N	N	N/A	N/A	N	N/A	N/A	N/A	N/A	N/A	N/A	N/A	1.4105	no	-0.5304	no	N/A	N/A	N/A	N/A	N/A	N	N/A	N/A	N/A
N/A	N/A	PPAS0B09320	N/A	N/A	749	N/A	N/A	N/A	N/A	N/A	Y	N	N/A	N/A	N	N/A	N/A	N/A	N/A	N/A	N/A	N/A	-1.85332	yes	0.302921	no	N/A	N/A	N/A	N/A	N/A	N	N/A	N/A	N/A
N/A	N/A	PPAS0B09390	N/A	N/A	750	N/A	N/A	N/A	N/A	N/A	Y	N	N/A	N/A	N	N/A	N/A	N/A	N/A	N/A	N/A	N/A	0.815899	yes	-0.311434	no	N/A	N/A	N/A	N/A	N/A	Y	N/A	N/A	N/A
N/A	N/A	PPAS0B09420	N/A	N/A	751	N/A	N/A	N/A	N/A	N/A	N	N	N/A	N/A	N	N/A	N/A	N/A	N/A	N/A	N/A	N/A	-0.582198	no	0.415319	no	N/A	N/A	N/A	N/A	N/A	N	N/A	N/A	N/A
N/A	N/A	PPAS0B09470	N/A	N/A	752	N/A	N/A	N/A	N/A	N/A	N	N	N/A	N/A	N	N/A	N/A	N/A	N/A	N/A	N/A	N/A	-0.415148	no	-0.0753704	no	N/A	N/A	N/A	N/A	N/A	N	N/A	N/A	N/A
N/A	N/A	PPAS0B09490	N/A	N/A	753	N/A	N/A	N/A	N/A	N/A	N	N	N/A	N/A	N	N/A	N/A	N/A	N/A	N/A	N/A	N/A	-0.0670973	no	0.0338895	no	N/A	N/A	N/A	N/A	N/A	N	N/A	N/A	N/A
N/A	N/A	PPAS0B09520	N/A	N/A	754	N/A	N/A	N/A	N/A	N/A	N	N	N/A	N/A	N	N/A	N/A	N/A	N/A	N/A	N/A	N/A	0.826904	no	0.366185	no	N/A	N/A	N/A	N/A	N/A	N	N/A	N/A	N/A
N/A	N/A	PPAS0B09530	N/A	N/A	755	N/A	N/A	N/A	N/A	N/A	Y	N	N/A	N/A	N	N/A	N/A	N/A	N/A	N/A	N/A	N/A	0.7123	no	-0.186792	no	N/A	N/A	N/A	N/A	N/A	Y	N/A	N/A	N/A
N/A	N/A	PPAS0B09540	N/A	N/A	756	N/A	N/A	N/A	N/A	N/A	N	N	N/A	N/A	N	N/A	N/A	N/A	N/A	N/A	N/A	N/A	N/A	N/A	N/A	N/A	N/A	N/A	N/A	N/A	N/A	Y	N/A	N/A	N/A
N/A	N/A	PPAS0B09570	N/A	N/A	757	N/A	N/A	N/A	N/A	N/A	Y	N	N/A	N/A	N	N/A	N/A	N/A	N/A	N/A	N/A	N/A	-1.9766	yes	0.010325	no	N/A	N/A	N/A	N/A	N/A	N	N/A	N/A	N/A
N/A	N/A	PPAS0B09600	N/A	N/A	758	N/A	N/A	N/A	N/A	N/A	N	N	N/A	N/A	N	N/A	N/A	N/A	N/A	N/A	N/A	N/A	1.13829	yes	0.18957	no	N/A	N/A	N/A	N/A	N/A	N	N/A	N/A	N/A
N/A	N/A	PPAS0B09630	N/A	N/A	759	N/A	N/A	N/A	N/A	N/A	N	N	N/A	N/A	N	N/A	N/A	N/A	N/A	N/A	N/A	N/A	-0.350864	no	0.18215	no	N/A	N/A	N/A	N/A	N/A	N	N/A	N/A	N/A
N/A	N/A	PPAS0B09640	N/A	N/A	760	N/A	N/A	N/A	N/A	N/A	Y	N	N/A	N/A	N	N/A	N/A	N/A	N/A	N/A	N/A	N/A	-1.90929	no	-0.495325	no	N/A	N/A	N/A	N/A	N/A	N	N/A	N/A	N/A
N/A	N/A	PPAS0B09680	N/A	N/A	761	N/A	N/A	N/A	N/A	N/A	N	N	N/A	N/A	N	N/A	N/A	N/A	N/A	N/A	N/A	N/A	0.4095	no	0.157368	no	N/A	N/A	N/A	N/A	N/A	N	N/A	N/A	N/A
N/A	N/A	PPAS0B09690	N/A	N/A	762	N/A	N/A	N/A	N/A	N/A	N	N	N/A	N/A	N	N/A	N/A	N/A	N/A	N/A	N/A	N/A	0.4095	no	0.157368	no	N/A	N/A	N/A	N/A	N/A	N	N/A	N/A	N/A
N/A	N/A	PPAS0B09710	N/A	N/A	763	N/A	N/A	N/A	N/A	N/A	Y	N	N/A	N/A	N	N/A	N/A	N/A	N/A	N/A	N/A	N/A	0.978575	no	-0.322359	no	N/A	N/A	N/A	N/A	N/A	Y	N/A	N/A	N/A
N/A	N/A	PPAS0B09720	N/A	N/A	764	N/A	N/A	N/A	N/A	N/A	Y	N	N/A	N/A	N	N/A	N/A	N/A	N/A	N/A	N/A	N/A	-3.47044	yes	-0.235144	no	N/A	N/A	N/A	N/A	N/A	Y	N/A	N/A	N/A
N/A	N/A	PPAS0B09730	N/A	N/A	765	N/A	N/A	N/A	N/A	N/A	N	N	N/A	N/A	N	N/A	N/A	N/A	N/A	N/A	N/A	N/A	-3.47044	yes	-0.235144	no	N/A	N/A	N/A	N/A	N/A	N	N/A	N/A	N/A
N/A	N/A	PPAS0B09740	N/A	N/A	766	N/A	N/A	N/A	N/A	N/A	Y	N	N/A	N/A	N	N/A	N/A	N/A	N/A	N/A	N/A	N/A	-3.47044	yes	-0.235144	no	N/A	N/A	N/A	N/A	N/A	N	N/A	N/A	N/A
N/A	N/A	PPAS0B09760	N/A	N/A	767	N/A	N/A	N/A	N/A	N/A	N	N	N/A	N/A	N	N/A	N/A	N/A	N/A	N/A	N/A	N/A	1.25391	yes	0.221547	no	N/A	N/A	N/A	N/A	N/A	N	N/A	N/A	N/A
N/A	N/A	PPAS0B09780	N/A	N/A	768	N/A	N/A	N/A	N/A	N/A	N	N	N/A	N/A	N	N/A	N/A	N/A	N/A	N/A	N/A	N/A	N/A	N/A	N/A	N/A	N/A	N/A	N/A	N/A	N/A	N	N/A	N/A	N/A
N/A	N/A	PPAS0B09840	N/A	N/A	769	N/A	N/A	N/A	N/A	N/A	N	N	N/A	N/A	N	N/A	N/A	N/A	N/A	N/A	N/A	N/A	N/A	N/A	N/A	N/A	N/A	N/A	N/A	N/A	N/A	N	N/A	N/A	N/A
N/A	N/A	PPAS0B09920	N/A	N/A	770	N/A	N/A	N/A	N/A	N/A	N	N	N/A	N/A	N	N/A	N/A	N/A	N/A	N/A	N/A	N/A	N/A	N/A	N/A	N/A	N/A	N/A	N/A	N/A	N/A	Y	N/A	N/A	N/A
N/A	N/A	PPAS0B09940	N/A	N/A	771	N/A	N/A	N/A	N/A	N/A	N	N	N/A	N/A	N	N/A	N/A	N/A	N/A	N/A	N/A	N/A	-0.312901	no	0.34493	no	N/A	N/A	N/A	N/A	N/A	N	N/A	N/A	N/A
N/A	N/A	PPAS0B09950	N/A	N/A	772	N/A	N/A	N/A	N/A	N/A	N	N	N/A	N/A	N	N/A	N/A	N/A	N/A	N/A	N/A	N/A	-0.276121	no	0.328554	no	N/A	N/A	N/A	N/A	N/A	N	N/A	N/A	N/A
N/A	N/A	PPAS0B10040	N/A	N/A	773	N/A	N/A	N/A	N/A	N/A	Y	N	N/A	N/A	N	N/A	N/A	N/A	N/A	N/A	N/A	N/A	1.85149	yes	-0.756055	no	N/A	N/A	N/A	N/A	N/A	Y	N/A	N/A	N/A
N/A	N/A	PPAS0B10060	N/A	N/A	774	N/A	N/A	N/A	N/A	N/A	N	N	N/A	N/A	N	N/A	N/A	N/A	N/A	N/A	N/A	N/A	-1.35992	yes	0.357795	no	N/A	N/A	N/A	N/A	N/A	Y	N/A	N/A	N/A
N/A	N/A	PPAS0B10130	N/A	N/A	775	N/A	N/A	N/A	N/A	N/A	N	N	N/A	N/A	N	N/A	N/A	N/A	N/A	N/A	N/A	N/A	-0.521909	no	0.03921	no	N/A	N/A	N/A	N/A	N/A	N	N/A	N/A	N/A
N/A	N/A	PPAS0B10150	N/A	N/A	776	N/A	N/A	N/A	N/A	N/A	N	N	N/A	N/A	N	N/A	N/A	N/A	N/A	N/A	N/A	N/A	N/A	N/A	N/A	N/A	N/A	N/A	N/A	N/A	N/A	Y	N/A	N/A	N/A
N/A	N/A	PPAS0B10210	N/A	N/A	777	N/A	N/A	N/A	N/A	N/A	Y	N	N/A	N/A	N	N/A	N/A	N/A	N/A	N/A	N/A	N/A	3.99014	yes	-2.296	yes	N/A	N/A	N/A	N/A	N/A	Y	N/A	N/A	N/A
N/A	N/A	PPAS0B10230	N/A	N/A	778	N/A	N/A	N/A	N/A	N/A	N	N	N/A	N/A	N	N/A	N/A	N/A	N/A	N/A	N/A	N/A	1.23059	yes	0.104695	no	N/A	N/A	N/A	N/A	N/A	Y	N/A	N/A	N/A
N/A	N/A	PPAS0B10240	N/A	N/A	779	N/A	N/A	N/A	N/A	N/A	N	N	N/A	N/A	N	N/A	N/A	N/A	N/A	N/A	N/A	N/A	N/A	N/A	N/A	N/A	N/A	N/A	N/A	N/A	N/A	N	N/A	N/A	N/A
N/A	N/A	PPAS0B10300	N/A	N/A	780	N/A	N/A	N/A	N/A	N/A	N	N	N/A	N/A	N	N/A	N/A	N/A	N/A	N/A	N/A	N/A	N/A	N/A	N/A	N/A	N/A	N/A	N/A	N/A	N/A	N	N/A	N/A	N/A
N/A	N/A	PPAS0B10330	N/A	N/A	781	N/A	N/A	N/A	N/A	N/A	N	N	N/A	N/A	N	N/A	N/A	N/A	N/A	N/A	N/A	N/A	1.07481	no	-0.266657	no	N/A	N/A	N/A	N/A	N/A	N	N/A	N/A	N/A
N/A	N/A	PPAS0B10340	N/A	N/A	782	N/A	N/A	N/A	N/A	N/A	N	N	N/A	N/A	N	N/A	N/A	N/A	N/A	N/A	N/A	N/A	N/A	N/A	N/A	N/A	N/A	N/A	N/A	N/A	N/A	N	N/A	N/A	N/A
N/A	N/A	PPAS0B10390	N/A	N/A	783	N/A	N/A	N/A	N/A	N/A	N	N	N/A	N/A	N	N/A	N/A	N/A	N/A	N/A	N/A	N/A	0.848856	no	0.357025	no	N/A	N/A	N/A	N/A	N/A	N	N/A	N/A	N/A
N/A	N/A	PPAS0B10420	N/A	N/A	784	N/A	N/A	N/A	N/A	N/A	N	N	N/A	N/A	N	N/A	N/A	N/A	N/A	N/A	N/A	N/A	N/A	N/A	N/A	N/A	N/A	N/A	N/A	N/A	N/A	N	N/A	N/A	N/A
N/A	N/A	PPAS0B10440	N/A	N/A	785	N/A	N/A	N/A	N/A	N/A	N	N	N/A	N/A	N	N/A	N/A	N/A	N/A	N/A	N/A	N/A	0.442231	no	0.397327	no	N/A	N/A	N/A	N/A	N/A	N	N/A	N/A	N/A
N/A	N/A	PPAS0B10470	N/A	N/A	786	N/A	N/A	N/A	N/A	N/A	N	N	N/A	N/A	N	N/A	N/A	N/A	N/A	N/A	N/A	N/A	N/A	N/A	N/A	N/A	N/A	N/A	N/A	N/A	N/A	N	N/A	N/A	N/A
N/A	N/A	PPAS0B10500	N/A	N/A	787	N/A	N/A	N/A	N/A	N/A	Y	N	N/A	N/A	N	N/A	N/A	N/A	N/A	N/A	N/A	N/A	N/A	N/A	N/A	N/A	N/A	N/A	N/A	N/A	N/A	N	N/A	N/A	N/A
N/A	N/A	PPAS0B10560	N/A	N/A	788	N/A	N/A	N/A	N/A	N/A	Y	N	N/A	N/A	N	N/A	N/A	N/A	N/A	N/A	N/A	N/A	N/A	N/A	N/A	N/A	N/A	N/A	N/A	N/A	N/A	N	N/A	N/A	N/A
N/A	N/A	PPAS0B10570	N/A	N/A	789	N/A	N/A	N/A	N/A	N/A	N	N	N/A	N/A	N	N/A	N/A	N/A	N/A	N/A	N/A	N/A	N/A	N/A	N/A	N/A	N/A	N/A	N/A	N/A	N/A	N	N/A	N/A	N/A
N/A	N/A	PPAS0B10580	N/A	N/A	790	N/A	N/A	N/A	N/A	N/A	N	N	N/A	N/A	N	N/A	N/A	N/A	N/A	N/A	N/A	N/A	N/A	N/A	N/A	N/A	N/A	N/A	N/A	N/A	N/A	N	N/A	N/A	N/A
N/A	N/A	PPAS0B10660	N/A	N/A	791	N/A	N/A	N/A	N/A	N/A	Y	N	N/A	N/A	N	N/A	N/A	N/A	N/A	N/A	N/A	N/A	1.2255	no	-1.01228	no	N/A	N/A	N/A	N/A	N/A	Y	N/A	N/A	N/A
N/A	N/A	PPAS0B10740	N/A	N/A	792	N/A	N/A	N/A	N/A	N/A	N	N	N/A	N/A	N	N/A	N/A	N/A	N/A	N/A	N/A	N/A	-0.438034	no	0.0356531	no	N/A	N/A	N/A	N/A	N/A	Y	N/A	N/A	N/A
N/A	N/A	PPAS0B10760	N/A	N/A	793	N/A	N/A	N/A	N/A	N/A	N	N	N/A	N/A	N	N/A	N/A	N/A	N/A	N/A	N/A	N/A	1.72011	yes	0.401573	no	N/A	N/A	N/A	N/A	N/A	Y	N/A	N/A	N/A
N/A	N/A	PPAS0B10810	N/A	N/A	794	N/A	N/A	N/A	N/A	N/A	N	N	N/A	N/A	N	N/A	N/A	N/A	N/A	N/A	N/A	N/A	0.00625669	no	0.236081	no	N/A	N/A	N/A	N/A	N/A	N	N/A	N/A	N/A
N/A	N/A	PPAS0B10820	N/A	N/A	795	N/A	N/A	N/A	N/A	N/A	N	N	N/A	N/A	N	N/A	N/A	N/A	N/A	N/A	N/A	N/A	0.908617	yes	0.21344	no	N/A	N/A	N/A	N/A	N/A	N	N/A	N/A	N/A
N/A	N/A	PPAS0B10840	N/A	N/A	796	N/A	N/A	N/A	N/A	N/A	Y	N	N/A	N/A	N	N/A	N/A	N/A	N/A	N/A	N/A	N/A	0.756805	yes	0.0197398	no	N/A	N/A	N/A	N/A	N/A	N	N/A	N/A	N/A
N/A	N/A	PPAS0B10870	N/A	N/A	797	N/A	N/A	N/A	N/A	N/A	N	N	N/A	N/A	N	N/A	N/A	N/A	N/A	N/A	N/A	N/A	N/A	N/A	N/A	N/A	N/A	N/A	N/A	N/A	N/A	N	N/A	N/A	N/A
N/A	N/A	PPAS0B10890	N/A	N/A	798	N/A	N/A	N/A	N/A	N/A	N	N	N/A	N/A	N	N/A	N/A	N/A	N/A	N/A	N/A	N/A	1.04408	yes	0.168985	no	N/A	N/A	N/A	N/A	N/A	N	N/A	N/A	N/A
N/A	N/A	PPAS0B10950	N/A	N/A	799	N/A	N/A	N/A	N/A	N/A	N	N	N/A	N/A	N	N/A	N/A	N/A	N/A	N/A	N/A	N/A	0.321019	no	0.233495	no	N/A	N/A	N/A	N/A	N/A	N	N/A	N/A	N/A
N/A	N/A	PPAS0B10980	N/A	N/A	800	N/A	N/A	N/A	N/A	N/A	N	N	N/A	N/A	N	N/A	N/A	N/A	N/A	N/A	N/A	N/A	1.04826	no	0.312734	no	N/A	N/A	N/A	N/A	N/A	N	N/A	N/A	N/A
N/A	N/A	PPAS0B11010	N/A	N/A	801	N/A	N/A	N/A	N/A	N/A	N	N	N/A	N/A	N	N/A	N/A	N/A	N/A	N/A	N/A	N/A	-0.271891	no	0.453909	no	N/A	N/A	N/A	N/A	N/A	N	N/A	N/A	N/A
N/A	N/A	PPAS0B11070	N/A	N/A	802	N/A	N/A	N/A	N/A	N/A	N	N	N/A	N/A	N	N/A	N/A	N/A	N/A	N/A	N/A	N/A	-0.181513	no	0.043367	no	N/A	N/A	N/A	N/A	N/A	N	N/A	N/A	N/A
N/A	N/A	PPAS0B11080	N/A	N/A	803	N/A	N/A	N/A	N/A	N/A	N	N	N/A	N/A	N	N/A	N/A	N/A	N/A	N/A	N/A	N/A	1.42295	yes	0.0984175	no	N/A	N/A	N/A	N/A	N/A	N	N/A	N/A	N/A
N/A	N/A	PPAS0B11140	N/A	N/A	804	N/A	N/A	N/A	N/A	N/A	N	N	N/A	N/A	N	N/A	N/A	N/A	N/A	N/A	N/A	N/A	1.94131	yes	9.37143e-05	no	N/A	N/A	N/A	N/A	N/A	N	N/A	N/A	N/A
N/A	N/A	PPAS0B11250	N/A	N/A	805	N/A	N/A	N/A	N/A	N/A	N	N	N/A	N/A	N	N/A	N/A	N/A	N/A	N/A	N/A	N/A	N/A	N/A	N/A	N/A	N/A	N/A	N/A	N/A	N/A	Y	N/A	N/A	N/A
N/A	N/A	PPAS0B11300	N/A	N/A	806	N/A	N/A	N/A	N/A	N/A	N	N	N/A	N/A	N	N/A	N/A	N/A	N/A	N/A	N/A	N/A	-0.431108	no	0.280581	no	N/A	N/A	N/A	N/A	N/A	Y	N/A	N/A	N/A
N/A	N/A	PPAS0B11340	N/A	N/A	807	N/A	N/A	N/A	N/A	N/A	N	N	N/A	N/A	N	N/A	N/A	N/A	N/A	N/A	N/A	N/A	0.332018	no	0.323596	no	N/A	N/A	N/A	N/A	N/A	N	N/A	N/A	N/A
N/A	N/A	PPAS0B11370	N/A	N/A	808	N/A	N/A	N/A	N/A	N/A	N	N	N/A	N/A	N	N/A	N/A	N/A	N/A	N/A	N/A	N/A	-1.65086	no	0.403979	no	N/A	N/A	N/A	N/A	N/A	Y	N/A	N/A	N/A
N/A	N/A	PPAS0B11440	N/A	N/A	809	N/A	N/A	N/A	N/A	N/A	Y	N	N/A	N/A	N	N/A	N/A	N/A	N/A	N/A	N/A	N/A	N/A	N/A	N/A	N/A	N/A	N/A	N/A	N/A	N/A	N	N/A	N/A	N/A
N/A	N/A	PPAS0B11510	N/A	N/A	810	N/A	N/A	N/A	N/A	N/A	N	N	N/A	N/A	N	N/A	N/A	N/A	N/A	N/A	N/A	N/A	0.99616	no	-0.0806203	no	N/A	N/A	N/A	N/A	N/A	N	N/A	N/A	N/A
N/A	N/A	PPAS0B11520	N/A	N/A	811	N/A	N/A	N/A	N/A	N/A	N	N	N/A	N/A	N	N/A	N/A	N/A	N/A	N/A	N/A	N/A	-2.63988	no	0.522245	no	N/A	N/A	N/A	N/A	N/A	N	N/A	N/A	N/A
N/A	N/A	PPAS0B11540	N/A	N/A	812	N/A	N/A	N/A	N/A	N/A	Y	N	N/A	N/A	N	N/A	N/A	N/A	N/A	N/A	N/A	N/A	N/A	N/A	N/A	N/A	N/A	N/A	N/A	N/A	N/A	Y	N/A	N/A	N/A
N/A	N/A	PPAS0B11550	N/A	N/A	813	N/A	N/A	N/A	N/A	N/A	Y	N	N/A	N/A	N	N/A	N/A	N/A	N/A	N/A	N/A	N/A	1.05741	yes	0.652257	yes	N/A	N/A	N/A	N/A	N/A	Y	N/A	N/A	N/A
N/A	N/A	PPAS0B11580	N/A	N/A	814	N/A	N/A	N/A	N/A	N/A	N	N	N/A	N/A	N	N/A	N/A	N/A	N/A	N/A	N/A	N/A	-0.189485	no	0.0940663	no	N/A	N/A	N/A	N/A	N/A	N	N/A	N/A	N/A
N/A	N/A	PPAS0B11590	N/A	N/A	815	N/A	N/A	N/A	N/A	N/A	N	N	N/A	N/A	N	N/A	N/A	N/A	N/A	N/A	N/A	N/A	-1.59194	yes	-0.268442	no	N/A	N/A	N/A	N/A	N/A	N	N/A	N/A	N/A
N/A	N/A	PPAS0B11660	N/A	N/A	816	N/A	N/A	N/A	N/A	N/A	Y	N	N/A	N/A	N	N/A	N/A	N/A	N/A	N/A	N/A	N/A	1.54524	no	-0.0598028	no	N/A	N/A	N/A	N/A	N/A	N	N/A	N/A	N/A
N/A	N/A	PPAS0B11690	N/A	N/A	817	N/A	N/A	N/A	N/A	N/A	Y	N	N/A	N/A	N	N/A	N/A	N/A	N/A	N/A	N/A	N/A	1.72827	yes	-0.93951	no	N/A	N/A	N/A	N/A	N/A	Y	N/A	N/A	N/A
N/A	N/A	PPAS0B11700	N/A	N/A	818	N/A	N/A	N/A	N/A	N/A	N	N	N/A	N/A	N	N/A	N/A	N/A	N/A	N/A	N/A	N/A	-1.22793	no	0.0245291	no	N/A	N/A	N/A	N/A	N/A	N	N/A	N/A	N/A
N/A	N/A	PPAS0B11710	N/A	N/A	819	N/A	N/A	N/A	N/A	N/A	N	N	N/A	N/A	N	N/A	N/A	N/A	N/A	N/A	N/A	N/A	-1.22793	no	0.0245291	no	N/A	N/A	N/A	N/A	N/A	N	N/A	N/A	N/A
N/A	N/A	PPAS0B11720	N/A	N/A	820	N/A	N/A	N/A	N/A	N/A	Y	N	N/A	N/A	N	N/A	N/A	N/A	N/A	N/A	N/A	N/A	-0.989104	yes	0.406213	no	N/A	N/A	N/A	N/A	N/A	Y	N/A	N/A	N/A
N/A	N/A	PPAS0B11730	N/A	N/A	821	N/A	N/A	N/A	N/A	N/A	N	N	N/A	N/A	N	N/A	N/A	N/A	N/A	N/A	N/A	N/A	-1.27334	yes	0.297582	no	N/A	N/A	N/A	N/A	N/A	N	N/A	N/A	N/A
N/A	N/A	PPAS0B11750	N/A	N/A	822	N/A	N/A	N/A	N/A	N/A	Y	N	N/A	N/A	N	N/A	N/A	N/A	N/A	N/A	N/A	N/A	-2.98999	yes	0.0222588	no	N/A	N/A	N/A	N/A	N/A	N	N/A	N/A	N/A
N/A	N/A	PPAS0B11760	N/A	N/A	823	N/A	N/A	N/A	N/A	N/A	N	N	N/A	N/A	N	N/A	N/A	N/A	N/A	N/A	N/A	N/A	-2.98999	yes	0.0222588	no	N/A	N/A	N/A	N/A	N/A	Y	N/A	N/A	N/A
N/A	N/A	PPAS0B11770	N/A	N/A	824	N/A	N/A	N/A	N/A	N/A	N	N	N/A	N/A	N	N/A	N/A	N/A	N/A	N/A	N/A	N/A	N/A	N/A	N/A	N/A	N/A	N/A	N/A	N/A	N/A	N	N/A	N/A	N/A
N/A	N/A	PPAS0B11820	N/A	N/A	825	N/A	N/A	N/A	N/A	N/A	Y	N	N/A	N/A	N	N/A	N/A	N/A	N/A	N/A	N/A	N/A	N/A	N/A	N/A	N/A	N/A	N/A	N/A	N/A	N/A	N	N/A	N/A	N/A
N/A	N/A	PPAS0B11830	N/A	N/A	826	N/A	N/A	N/A	N/A	N/A	Y	N	N/A	N/A	N	N/A	N/A	N/A	N/A	N/A	N/A	N/A	1.23783	yes	-1.44086	yes	N/A	N/A	N/A	N/A	N/A	N	N/A	N/A	N/A
N/A	N/A	PPAS0B11900	N/A	N/A	827	N/A	N/A	N/A	N/A	N/A	Y	N	N/A	N/A	N	N/A	N/A	N/A	N/A	N/A	N/A	N/A	-1.46911	yes	0.0298477	no	N/A	N/A	N/A	N/A	N/A	Y	N/A	N/A	N/A
N/A	N/A	PPAS0B11920	N/A	N/A	828	N/A	N/A	N/A	N/A	N/A	N	N	N/A	N/A	N	N/A	N/A	N/A	N/A	N/A	N/A	N/A	-1.4768	yes	0.275697	no	N/A	N/A	N/A	N/A	N/A	N	N/A	N/A	N/A
N/A	N/A	PPAS0B11930	N/A	N/A	829	N/A	N/A	N/A	N/A	N/A	N	N	N/A	N/A	N	N/A	N/A	N/A	N/A	N/A	N/A	N/A	N/A	N/A	N/A	N/A	N/A	N/A	N/A	N/A	N/A	Y	N/A	N/A	N/A
N/A	N/A	PPAS0B11940	N/A	N/A	830	N/A	N/A	N/A	N/A	N/A	N	N	N/A	N/A	N	N/A	N/A	N/A	N/A	N/A	N/A	N/A	1.37506	yes	0.100244	no	N/A	N/A	N/A	N/A	N/A	Y	N/A	N/A	N/A
N/A	N/A	PPAS0B11980	N/A	N/A	831	N/A	N/A	N/A	N/A	N/A	Y	N	N/A	N/A	N	N/A	N/A	N/A	N/A	N/A	N/A	N/A	N/A	N/A	N/A	N/A	N/A	N/A	N/A	N/A	N/A	N	N/A	N/A	N/A
N/A	N/A	PPAS0B12040	N/A	N/A	832	N/A	N/A	N/A	N/A	N/A	N	N	N/A	N/A	N	N/A	N/A	N/A	N/A	N/A	N/A	N/A	1.37774	yes	0.0245013	no	N/A	N/A	N/A	N/A	N/A	N	N/A	N/A	N/A
N/A	N/A	PPAS0B12090	N/A	N/A	833	N/A	N/A	N/A	N/A	N/A	N	N	N/A	N/A	N	N/A	N/A	N/A	N/A	N/A	N/A	N/A	1.36466	yes	-0.266289	no	N/A	N/A	N/A	N/A	N/A	N	N/A	N/A	N/A
N/A	N/A	PPAS0B12140	N/A	N/A	834	N/A	N/A	N/A	N/A	N/A	Y	N	N/A	N/A	N	N/A	N/A	N/A	N/A	N/A	N/A	N/A	-0.648138	no	-0.236624	no	N/A	N/A	N/A	N/A	N/A	N	N/A	N/A	N/A
N/A	N/A	PPAS0B12210	N/A	N/A	835	N/A	N/A	N/A	N/A	N/A	Y	N	N/A	N/A	N	N/A	N/A	N/A	N/A	N/A	N/A	N/A	-1.35961	yes	-0.522627	no	N/A	N/A	N/A	N/A	N/A	Y	N/A	N/A	N/A
N/A	N/A	PPAS0B12270	N/A	N/A	836	N/A	N/A	N/A	N/A	N/A	N	N	N/A	N/A	N	N/A	N/A	N/A	N/A	N/A	N/A	N/A	3.1523	yes	-0.0361912	no	N/A	N/A	N/A	N/A	N/A	N	N/A	N/A	N/A
N/A	N/A	PPAS0B12280	N/A	N/A	837	N/A	N/A	N/A	N/A	N/A	N	N	N/A	N/A	N	N/A	N/A	N/A	N/A	N/A	N/A	N/A	3.1523	yes	-0.0361912	no	N/A	N/A	N/A	N/A	N/A	N	N/A	N/A	N/A
N/A	N/A	PPAS0B12290	N/A	N/A	838	N/A	N/A	N/A	N/A	N/A	Y	N	N/A	N/A	N	N/A	N/A	N/A	N/A	N/A	N/A	N/A	3.1523	yes	-0.0361912	no	N/A	N/A	N/A	N/A	N/A	Y	N/A	N/A	N/A
N/A	N/A	PPAS0B12300	N/A	N/A	839	N/A	N/A	N/A	N/A	N/A	Y	N	N/A	N/A	N	N/A	N/A	N/A	N/A	N/A	N/A	N/A	0.792251	no	-0.117196	no	N/A	N/A	N/A	N/A	N/A	Y	N/A	N/A	N/A
N/A	N/A	PPAS0B12310	N/A	N/A	840	N/A	N/A	N/A	N/A	N/A	N	N	N/A	N/A	N	N/A	N/A	N/A	N/A	N/A	N/A	N/A	0.43696	no	0.248029	no	N/A	N/A	N/A	N/A	N/A	N	N/A	N/A	N/A
N/A	N/A	PPAS0B12330	N/A	N/A	841	N/A	N/A	N/A	N/A	N/A	N	N	N/A	N/A	N	N/A	N/A	N/A	N/A	N/A	N/A	N/A	1.05866	yes	-0.25627	no	N/A	N/A	N/A	N/A	N/A	N	N/A	N/A	N/A
N/A	N/A	PPAS0B12340	N/A	N/A	842	N/A	N/A	N/A	N/A	N/A	N	N	N/A	N/A	N	N/A	N/A	N/A	N/A	N/A	N/A	N/A	3.23798	yes	0.240953	no	N/A	N/A	N/A	N/A	N/A	N	N/A	N/A	N/A
N/A	N/A	PPAS0B12350	N/A	N/A	843	N/A	N/A	N/A	N/A	N/A	N	N	N/A	N/A	N	N/A	N/A	N/A	N/A	N/A	N/A	N/A	3.07604	yes	-0.733055	yes	N/A	N/A	N/A	N/A	N/A	Y	N/A	N/A	N/A
N/A	N/A	PPAS0B12400	N/A	N/A	844	N/A	N/A	N/A	N/A	N/A	N	N	N/A	N/A	N	N/A	N/A	N/A	N/A	N/A	N/A	N/A	-0.0574429	no	-0.07635	no	N/A	N/A	N/A	N/A	N/A	N	N/A	N/A	N/A
N/A	N/A	PPAS0B12460	N/A	N/A	845	N/A	N/A	N/A	N/A	N/A	N	N	N/A	N/A	N	N/A	N/A	N/A	N/A	N/A	N/A	N/A	0.759051	yes	0.307152	no	N/A	N/A	N/A	N/A	N/A	N	N/A	N/A	N/A
N/A	N/A	PPAS0B12470	N/A	N/A	846	N/A	N/A	N/A	N/A	N/A	N	N	N/A	N/A	N	N/A	N/A	N/A	N/A	N/A	N/A	N/A	N/A	N/A	N/A	N/A	N/A	N/A	N/A	N/A	N/A	N	N/A	N/A	N/A
N/A	N/A	PPAS0B12500	N/A	N/A	847	N/A	N/A	N/A	N/A	N/A	Y	N	N/A	N/A	N	N/A	N/A	N/A	N/A	N/A	N/A	N/A	N/A	N/A	N/A	N/A	N/A	N/A	N/A	N/A	N/A	N	N/A	N/A	N/A
N/A	N/A	PPAS0B12510	N/A	N/A	848	N/A	N/A	N/A	N/A	N/A	Y	N	N/A	N/A	N	N/A	N/A	N/A	N/A	N/A	N/A	N/A	0.536032	no	0.107472	no	N/A	N/A	N/A	N/A	N/A	N	N/A	N/A	N/A
N/A	N/A	PPAS0B12540	N/A	N/A	849	N/A	N/A	N/A	N/A	N/A	N	N	N/A	N/A	N	N/A	N/A	N/A	N/A	N/A	N/A	N/A	-0.508422	no	0.101745	no	N/A	N/A	N/A	N/A	N/A	N	N/A	N/A	N/A
N/A	N/A	PPAS0B12570	N/A	N/A	850	N/A	N/A	N/A	N/A	N/A	N	N	N/A	N/A	N	N/A	N/A	N/A	N/A	N/A	N/A	N/A	N/A	N/A	N/A	N/A	N/A	N/A	N/A	N/A	N/A	N	N/A	N/A	N/A
N/A	N/A	PPAS0B12620	N/A	N/A	851	N/A	N/A	N/A	N/A	N/A	Y	N	N/A	N/A	N	N/A	N/A	N/A	N/A	N/A	N/A	N/A	-2.23308	yes	0.0270186	no	N/A	N/A	N/A	N/A	N/A	Y	N/A	N/A	N/A
N/A	N/A	PPAS0B12630	N/A	N/A	852	N/A	N/A	N/A	N/A	N/A	Y	N	N/A	N/A	N	N/A	N/A	N/A	N/A	N/A	N/A	N/A	-0.904573	no	0.160077	no	N/A	N/A	N/A	N/A	N/A	Y	N/A	N/A	N/A
N/A	N/A	PPAS0B12640	N/A	N/A	853	N/A	N/A	N/A	N/A	N/A	N	N	N/A	N/A	N	N/A	N/A	N/A	N/A	N/A	N/A	N/A	3.20963	no	-0.0162569	no	N/A	N/A	N/A	N/A	N/A	Y	N/A	N/A	N/A
N/A	N/A	PPAS0B12650	N/A	N/A	854	N/A	N/A	N/A	N/A	N/A	Y	N	N/A	N/A	N	N/A	N/A	N/A	N/A	N/A	N/A	N/A	-4.72988	yes	-0.33543	no	N/A	N/A	N/A	N/A	N/A	Y	N/A	N/A	N/A
N/A	N/A	PPAS0B12660	N/A	N/A	855	N/A	N/A	N/A	N/A	N/A	Y	N	N/A	N/A	N	N/A	N/A	N/A	N/A	N/A	N/A	N/A	-0.233752	no	0.266536	no	N/A	N/A	N/A	N/A	N/A	Y	N/A	N/A	N/A
N/A	N/A	PPAS0B12670	N/A	N/A	856	N/A	N/A	N/A	N/A	N/A	N	N	N/A	N/A	N	N/A	N/A	N/A	N/A	N/A	N/A	N/A	1.69355	no	-0.289379	no	N/A	N/A	N/A	N/A	N/A	Y	N/A	N/A	N/A
N/A	N/A	PPAS0B12680	N/A	N/A	857	N/A	N/A	N/A	N/A	N/A	N	N	N/A	N/A	N	N/A	N/A	N/A	N/A	N/A	N/A	N/A	1.69355	no	-0.289379	no	N/A	N/A	N/A	N/A	N/A	N	N/A	N/A	N/A
N/A	N/A	PPAS0B12690	N/A	N/A	858	N/A	N/A	N/A	N/A	N/A	N	N	N/A	N/A	N	N/A	N/A	N/A	N/A	N/A	N/A	N/A	1.69355	no	-0.289379	no	N/A	N/A	N/A	N/A	N/A	Y	N/A	N/A	N/A
N/A	N/A	PPAS0B12700	N/A	N/A	859	N/A	N/A	N/A	N/A	N/A	N	N	N/A	N/A	N	N/A	N/A	N/A	N/A	N/A	N/A	N/A	1.69355	no	-0.289379	no	N/A	N/A	N/A	N/A	N/A	Y	N/A	N/A	N/A
N/A	N/A	PPAS0B12710	N/A	N/A	860	N/A	N/A	N/A	N/A	N/A	N	N	N/A	N/A	N	N/A	N/A	N/A	N/A	N/A	N/A	N/A	0.695517	no	0.274154	no	N/A	N/A	N/A	N/A	N/A	Y	N/A	N/A	N/A
N/A	N/A	PPAS0B12720	N/A	N/A	861	N/A	N/A	N/A	N/A	N/A	N	N	N/A	N/A	N	N/A	N/A	N/A	N/A	N/A	N/A	N/A	-1.56321	no	-0.276827	no	N/A	N/A	N/A	N/A	N/A	Y	N/A	N/A	N/A
N/A	N/A	PPAS0C00100	N/A	N/A	862	N/A	N/A	N/A	N/A	N/A	Y	N	N/A	N/A	N	N/A	N/A	N/A	N/A	N/A	N/A	N/A	-0.231105	no	0.0522541	no	N/A	N/A	N/A	N/A	N/A	Y	N/A	N/A	N/A
N/A	N/A	PPAS0C00290	N/A	N/A	863	N/A	N/A	N/A	N/A	N/A	N	N	N/A	N/A	N	N/A	N/A	N/A	N/A	N/A	N/A	N/A	-0.145232	no	-0.358057	no	N/A	N/A	N/A	N/A	N/A	Y	N/A	N/A	N/A
N/A	N/A	PPAS0C00300	N/A	N/A	864	N/A	N/A	N/A	N/A	N/A	N	N	N/A	N/A	N	N/A	N/A	N/A	N/A	N/A	N/A	N/A	-0.118809	no	-0.126725	no	N/A	N/A	N/A	N/A	N/A	N	N/A	N/A	N/A
N/A	N/A	PPAS0C00310	N/A	N/A	865	N/A	N/A	N/A	N/A	N/A	N	N	N/A	N/A	N	N/A	N/A	N/A	N/A	N/A	N/A	N/A	0.326104	no	0.169544	no	N/A	N/A	N/A	N/A	N/A	N	N/A	N/A	N/A
N/A	N/A	PPAS0C00410	N/A	N/A	866	N/A	N/A	N/A	N/A	N/A	N	N	N/A	N/A	N	N/A	N/A	N/A	N/A	N/A	N/A	N/A	-0.641198	no	0.163189	no	N/A	N/A	N/A	N/A	N/A	Y	N/A	N/A	N/A
N/A	N/A	PPAS0C00440	N/A	N/A	867	N/A	N/A	N/A	N/A	N/A	Y	N	N/A	N/A	N	N/A	N/A	N/A	N/A	N/A	N/A	N/A	N/A	N/A	N/A	N/A	N/A	N/A	N/A	N/A	N/A	N	N/A	N/A	N/A
N/A	N/A	PPAS0C00480	N/A	N/A	868	N/A	N/A	N/A	N/A	N/A	N	N	N/A	N/A	N	N/A	N/A	N/A	N/A	N/A	N/A	N/A	N/A	N/A	N/A	N/A	N/A	N/A	N/A	N/A	N/A	N	N/A	N/A	N/A
N/A	N/A	PPAS0C00500	N/A	N/A	869	N/A	N/A	N/A	N/A	N/A	N	N	N/A	N/A	N	N/A	N/A	N/A	N/A	N/A	N/A	N/A	-1.68761	no	0.218295	no	N/A	N/A	N/A	N/A	N/A	N	N/A	N/A	N/A
N/A	N/A	PPAS0C00570	N/A	N/A	870	N/A	N/A	N/A	N/A	N/A	N	N	N/A	N/A	N	N/A	N/A	N/A	N/A	N/A	N/A	N/A	-0.217877	no	0.151113	no	N/A	N/A	N/A	N/A	N/A	N	N/A	N/A	N/A
N/A	N/A	PPAS0C00600	N/A	N/A	871	N/A	N/A	N/A	N/A	N/A	N	N	N/A	N/A	N	N/A	N/A	N/A	N/A	N/A	N/A	N/A	0.765689	no	0.0254923	no	N/A	N/A	N/A	N/A	N/A	N	N/A	N/A	N/A
N/A	N/A	PPAS0C00630	N/A	N/A	872	N/A	N/A	N/A	N/A	N/A	Y	N	N/A	N/A	N	N/A	N/A	N/A	N/A	N/A	N/A	N/A	0.627349	no	0.0403253	no	N/A	N/A	N/A	N/A	N/A	Y	N/A	N/A	N/A
N/A	N/A	PPAS0C00640	N/A	N/A	873	N/A	N/A	N/A	N/A	N/A	N	N	N/A	N/A	N	N/A	N/A	N/A	N/A	N/A	N/A	N/A	-1.17958	no	0.0686708	no	N/A	N/A	N/A	N/A	N/A	N	N/A	N/A	N/A
N/A	N/A	PPAS0C00650	N/A	N/A	874	N/A	N/A	N/A	N/A	N/A	N	N	N/A	N/A	N	N/A	N/A	N/A	N/A	N/A	N/A	N/A	N/A	N/A	N/A	N/A	N/A	N/A	N/A	N/A	N/A	N	N/A	N/A	N/A
N/A	N/A	PPAS0C00700	N/A	N/A	875	N/A	N/A	N/A	N/A	N/A	N	N	N/A	N/A	N	N/A	N/A	N/A	N/A	N/A	N/A	N/A	0.5531	no	-0.00700454	no	N/A	N/A	N/A	N/A	N/A	N	N/A	N/A	N/A
N/A	N/A	PPAS0C00780	N/A	N/A	876	N/A	N/A	N/A	N/A	N/A	N	N	N/A	N/A	N	N/A	N/A	N/A	N/A	N/A	N/A	N/A	-0.368496	no	0.1877	no	N/A	N/A	N/A	N/A	N/A	Y	N/A	N/A	N/A
N/A	N/A	PPAS0C00890	N/A	N/A	877	N/A	N/A	N/A	N/A	N/A	N	N	N/A	N/A	N	N/A	N/A	N/A	N/A	N/A	N/A	N/A	1.29553	yes	-0.115392	no	N/A	N/A	N/A	N/A	N/A	N	N/A	N/A	N/A
N/A	N/A	PPAS0C00930	N/A	N/A	878	N/A	N/A	N/A	N/A	N/A	Y	N	N/A	N/A	N	N/A	N/A	N/A	N/A	N/A	N/A	N/A	1.63391	no	-1.50501	no	N/A	N/A	N/A	N/A	N/A	N	N/A	N/A	N/A
N/A	N/A	PPAS0C00940	N/A	N/A	879	N/A	N/A	N/A	N/A	N/A	N	N	N/A	N/A	N	N/A	N/A	N/A	N/A	N/A	N/A	N/A	1.63391	no	-1.50501	no	N/A	N/A	N/A	N/A	N/A	N	N/A	N/A	N/A
N/A	N/A	PPAS0C00970	N/A	N/A	880	N/A	N/A	N/A	N/A	N/A	N	N	N/A	N/A	N	N/A	N/A	N/A	N/A	N/A	N/A	N/A	-0.243859	no	0.0736483	no	N/A	N/A	N/A	N/A	N/A	N	N/A	N/A	N/A
N/A	N/A	PPAS0C01000	N/A	N/A	881	N/A	N/A	N/A	N/A	N/A	N	N	N/A	N/A	N	N/A	N/A	N/A	N/A	N/A	N/A	N/A	0.941002	no	0.11643	no	N/A	N/A	N/A	N/A	N/A	N	N/A	N/A	N/A
N/A	N/A	PPAS0C01010	N/A	N/A	882	N/A	N/A	N/A	N/A	N/A	N	N	N/A	N/A	N	N/A	N/A	N/A	N/A	N/A	N/A	N/A	0.781006	no	0.42743	no	N/A	N/A	N/A	N/A	N/A	N	N/A	N/A	N/A
N/A	N/A	PPAS0C01020	N/A	N/A	883	N/A	N/A	N/A	N/A	N/A	Y	N	N/A	N/A	N	N/A	N/A	N/A	N/A	N/A	N/A	N/A	0.142779	no	0.149849	no	N/A	N/A	N/A	N/A	N/A	N	N/A	N/A	N/A
N/A	N/A	PPAS0C01060	N/A	N/A	884	N/A	N/A	N/A	N/A	N/A	N	N	N/A	N/A	N	N/A	N/A	N/A	N/A	N/A	N/A	N/A	0.219904	no	0.548414	no	N/A	N/A	N/A	N/A	N/A	N	N/A	N/A	N/A
N/A	N/A	PPAS0C01130	N/A	N/A	885	N/A	N/A	N/A	N/A	N/A	N	N	N/A	N/A	N	N/A	N/A	N/A	N/A	N/A	N/A	N/A	N/A	N/A	N/A	N/A	N/A	N/A	N/A	N/A	N/A	N	N/A	N/A	N/A
N/A	N/A	PPAS0C01160	N/A	N/A	886	N/A	N/A	N/A	N/A	N/A	N	N	N/A	N/A	N	N/A	N/A	N/A	N/A	N/A	N/A	N/A	1.39451	yes	0	no	N/A	N/A	N/A	N/A	N/A	Y	N/A	N/A	N/A
N/A	N/A	PPAS0C01170	N/A	N/A	887	N/A	N/A	N/A	N/A	N/A	N	N	N/A	N/A	N	N/A	N/A	N/A	N/A	N/A	N/A	N/A	1.39451	yes	0	no	N/A	N/A	N/A	N/A	N/A	N	N/A	N/A	N/A
N/A	N/A	PPAS0C01180	N/A	N/A	888	N/A	N/A	N/A	N/A	N/A	N	N	N/A	N/A	N	N/A	N/A	N/A	N/A	N/A	N/A	N/A	N/A	N/A	N/A	N/A	N/A	N/A	N/A	N/A	N/A	Y	N/A	N/A	N/A
N/A	N/A	PPAS0C01190	N/A	N/A	889	N/A	N/A	N/A	N/A	N/A	Y	N	N/A	N/A	N	N/A	N/A	N/A	N/A	N/A	N/A	N/A	-0.42102	no	-0.0940215	no	N/A	N/A	N/A	N/A	N/A	Y	N/A	N/A	N/A
N/A	N/A	PPAS0C01260	N/A	N/A	890	N/A	N/A	N/A	N/A	N/A	N	N	N/A	N/A	N	N/A	N/A	N/A	N/A	N/A	N/A	N/A	-0.0427626	no	0.317798	no	N/A	N/A	N/A	N/A	N/A	Y	N/A	N/A	N/A
N/A	N/A	PPAS0C01270	N/A	N/A	891	N/A	N/A	N/A	N/A	N/A	N	N	N/A	N/A	N	N/A	N/A	N/A	N/A	N/A	N/A	N/A	-1.01505	no	0.320339	no	N/A	N/A	N/A	N/A	N/A	Y	N/A	N/A	N/A
N/A	N/A	PPAS0C01290	N/A	N/A	892	N/A	N/A	N/A	N/A	N/A	N	N	N/A	N/A	N	N/A	N/A	N/A	N/A	N/A	N/A	N/A	1.29262	no	-0.206126	no	N/A	N/A	N/A	N/A	N/A	Y	N/A	N/A	N/A
N/A	N/A	PPAS0C01310	N/A	N/A	893	N/A	N/A	N/A	N/A	N/A	N	N	N/A	N/A	N	N/A	N/A	N/A	N/A	N/A	N/A	N/A	N/A	N/A	N/A	N/A	N/A	N/A	N/A	N/A	N/A	N	N/A	N/A	N/A
N/A	N/A	PPAS0C01320	N/A	N/A	894	N/A	N/A	N/A	N/A	N/A	N	N	N/A	N/A	N	N/A	N/A	N/A	N/A	N/A	N/A	N/A	N/A	N/A	N/A	N/A	N/A	N/A	N/A	N/A	N/A	N	N/A	N/A	N/A
N/A	N/A	PPAS0C01330	N/A	N/A	895	N/A	N/A	N/A	N/A	N/A	N	N	N/A	N/A	N	N/A	N/A	N/A	N/A	N/A	N/A	N/A	0.729088	yes	0.0446945	no	N/A	N/A	N/A	N/A	N/A	N	N/A	N/A	N/A
N/A	N/A	PPAS0C01390	N/A	N/A	896	N/A	N/A	N/A	N/A	N/A	N	N	N/A	N/A	N	N/A	N/A	N/A	N/A	N/A	N/A	N/A	0.998077	yes	0.40345	no	N/A	N/A	N/A	N/A	N/A	N	N/A	N/A	N/A
N/A	N/A	PPAS0C01430	N/A	N/A	897	N/A	N/A	N/A	N/A	N/A	N	N	N/A	N/A	N	N/A	N/A	N/A	N/A	N/A	N/A	N/A	-1.50989	yes	0.0583504	no	N/A	N/A	N/A	N/A	N/A	N	N/A	N/A	N/A
N/A	N/A	PPAS0C01460	N/A	N/A	898	N/A	N/A	N/A	N/A	N/A	N	N	N/A	N/A	N	N/A	N/A	N/A	N/A	N/A	N/A	N/A	0.147152	no	0.263658	no	N/A	N/A	N/A	N/A	N/A	N	N/A	N/A	N/A
N/A	N/A	PPAS0C01500	N/A	N/A	899	N/A	N/A	N/A	N/A	N/A	N	N	N/A	N/A	N	N/A	N/A	N/A	N/A	N/A	N/A	N/A	-0.351354	no	0.142863	no	N/A	N/A	N/A	N/A	N/A	N	N/A	N/A	N/A
N/A	N/A	PPAS0C01570	N/A	N/A	900	N/A	N/A	N/A	N/A	N/A	N	N	N/A	N/A	N	N/A	N/A	N/A	N/A	N/A	N/A	N/A	0.0324787	no	0.158063	no	N/A	N/A	N/A	N/A	N/A	N	N/A	N/A	N/A
N/A	N/A	PPAS0C01590	N/A	N/A	901	N/A	N/A	N/A	N/A	N/A	N	N	N/A	N/A	N	N/A	N/A	N/A	N/A	N/A	N/A	N/A	N/A	N/A	N/A	N/A	N/A	N/A	N/A	N/A	N/A	N	N/A	N/A	N/A
N/A	N/A	PPAS0C01700	N/A	N/A	902	N/A	N/A	N/A	N/A	N/A	Y	N	N/A	N/A	N	N/A	N/A	N/A	N/A	N/A	N/A	N/A	3.50016	yes	-0.733836	no	N/A	N/A	N/A	N/A	N/A	N	N/A	N/A	N/A
N/A	N/A	PPAS0C01730	N/A	N/A	903	N/A	N/A	N/A	N/A	N/A	N	N	N/A	N/A	N	N/A	N/A	N/A	N/A	N/A	N/A	N/A	0.780277	yes	-0.0675238	no	N/A	N/A	N/A	N/A	N/A	N	N/A	N/A	N/A
N/A	N/A	PPAS0C01740	N/A	N/A	904	N/A	N/A	N/A	N/A	N/A	N	N	N/A	N/A	N	N/A	N/A	N/A	N/A	N/A	N/A	N/A	0.55903	no	0.471361	no	N/A	N/A	N/A	N/A	N/A	N	N/A	N/A	N/A
N/A	N/A	PPAS0C01770	N/A	N/A	905	N/A	N/A	N/A	N/A	N/A	Y	N	N/A	N/A	N	N/A	N/A	N/A	N/A	N/A	N/A	N/A	N/A	N/A	N/A	N/A	N/A	N/A	N/A	N/A	N/A	N	N/A	N/A	N/A
N/A	N/A	PPAS0C01780	N/A	N/A	906	N/A	N/A	N/A	N/A	N/A	N	N	N/A	N/A	N	N/A	N/A	N/A	N/A	N/A	N/A	N/A	N/A	N/A	N/A	N/A	N/A	N/A	N/A	N/A	N/A	N	N/A	N/A	N/A
N/A	N/A	PPAS0C01910	N/A	N/A	907	N/A	N/A	N/A	N/A	N/A	N	N	N/A	N/A	N	N/A	N/A	N/A	N/A	N/A	N/A	N/A	2.21368	yes	0.144128	no	N/A	N/A	N/A	N/A	N/A	Y	N/A	N/A	N/A
N/A	N/A	PPAS0C01920	N/A	N/A	908	N/A	N/A	N/A	N/A	N/A	N	N	N/A	N/A	N	N/A	N/A	N/A	N/A	N/A	N/A	N/A	1.30709	yes	-0.412694	no	N/A	N/A	N/A	N/A	N/A	N	N/A	N/A	N/A
N/A	N/A	PPAS0C01950	N/A	N/A	909	N/A	N/A	N/A	N/A	N/A	N	N	N/A	N/A	N	N/A	N/A	N/A	N/A	N/A	N/A	N/A	-0.294732	no	0.202247	no	N/A	N/A	N/A	N/A	N/A	N	N/A	N/A	N/A
N/A	N/A	PPAS0C01960	N/A	N/A	910	N/A	N/A	N/A	N/A	N/A	Y	N	N/A	N/A	N	N/A	N/A	N/A	N/A	N/A	N/A	N/A	0.260959	no	0.541232	no	N/A	N/A	N/A	N/A	N/A	N	N/A	N/A	N/A
N/A	N/A	PPAS0C01970	N/A	N/A	911	N/A	N/A	N/A	N/A	N/A	Y	N	N/A	N/A	N	N/A	N/A	N/A	N/A	N/A	N/A	N/A	-2.20729	yes	0.208489	no	N/A	N/A	N/A	N/A	N/A	N	N/A	N/A	N/A
N/A	N/A	PPAS0C01980	N/A	N/A	912	N/A	N/A	N/A	N/A	N/A	Y	N	N/A	N/A	N	N/A	N/A	N/A	N/A	N/A	N/A	N/A	-1.53503	yes	0.337024	no	N/A	N/A	N/A	N/A	N/A	N	N/A	N/A	N/A
N/A	N/A	PPAS0C02060	N/A	N/A	913	N/A	N/A	N/A	N/A	N/A	Y	N	N/A	N/A	N	N/A	N/A	N/A	N/A	N/A	N/A	N/A	0.503699	no	0.0050801	no	N/A	N/A	N/A	N/A	N/A	Y	N/A	N/A	N/A
N/A	N/A	PPAS0C02070	N/A	N/A	914	N/A	N/A	N/A	N/A	N/A	Y	N	N/A	N/A	N	N/A	N/A	N/A	N/A	N/A	N/A	N/A	2.01728	yes	-0.0117961	no	N/A	N/A	N/A	N/A	N/A	Y	N/A	N/A	N/A
N/A	N/A	PPAS0C02110	N/A	N/A	915	N/A	N/A	N/A	N/A	N/A	N	N	N/A	N/A	N	N/A	N/A	N/A	N/A	N/A	N/A	N/A	-0.0534923	no	-0.0863059	no	N/A	N/A	N/A	N/A	N/A	Y	N/A	N/A	N/A
N/A	N/A	PPAS0C02120	N/A	N/A	916	N/A	N/A	N/A	N/A	N/A	N	N	N/A	N/A	N	N/A	N/A	N/A	N/A	N/A	N/A	N/A	-0.0534923	no	-0.0863059	no	N/A	N/A	N/A	N/A	N/A	N	N/A	N/A	N/A
N/A	N/A	PPAS0C02140	N/A	N/A	917	N/A	N/A	N/A	N/A	N/A	N	N	N/A	N/A	N	N/A	N/A	N/A	N/A	N/A	N/A	N/A	-1.79025	no	-0.0177035	no	N/A	N/A	N/A	N/A	N/A	N	N/A	N/A	N/A
N/A	N/A	PPAS0C02150	N/A	N/A	918	N/A	N/A	N/A	N/A	N/A	N	N	N/A	N/A	N	N/A	N/A	N/A	N/A	N/A	N/A	N/A	-1.79025	no	-0.0177035	no	N/A	N/A	N/A	N/A	N/A	N	N/A	N/A	N/A
N/A	N/A	PPAS0C02160	N/A	N/A	919	N/A	N/A	N/A	N/A	N/A	N	N	N/A	N/A	N	N/A	N/A	N/A	N/A	N/A	N/A	N/A	N/A	N/A	N/A	N/A	N/A	N/A	N/A	N/A	N/A	N	N/A	N/A	N/A
N/A	N/A	PPAS0C02170	N/A	N/A	920	N/A	N/A	N/A	N/A	N/A	N	N	N/A	N/A	N	N/A	N/A	N/A	N/A	N/A	N/A	N/A	0.214563	no	0.4827	no	N/A	N/A	N/A	N/A	N/A	N	N/A	N/A	N/A
N/A	N/A	PPAS0C02190	N/A	N/A	921	N/A	N/A	N/A	N/A	N/A	N	N	N/A	N/A	N	N/A	N/A	N/A	N/A	N/A	N/A	N/A	-1.24141	yes	0.37254	no	N/A	N/A	N/A	N/A	N/A	N	N/A	N/A	N/A
N/A	N/A	PPAS0C02220	N/A	N/A	922	N/A	N/A	N/A	N/A	N/A	Y	N	N/A	N/A	N	N/A	N/A	N/A	N/A	N/A	N/A	N/A	-2.68375	yes	0.226724	no	N/A	N/A	N/A	N/A	N/A	N	N/A	N/A	N/A
N/A	N/A	PPAS0C02240	N/A	N/A	923	N/A	N/A	N/A	N/A	N/A	N	N	N/A	N/A	N	N/A	N/A	N/A	N/A	N/A	N/A	N/A	N/A	N/A	N/A	N/A	N/A	N/A	N/A	N/A	N/A	N	N/A	N/A	N/A
N/A	N/A	PPAS0C02270	N/A	N/A	924	N/A	N/A	N/A	N/A	N/A	N	N	N/A	N/A	N	N/A	N/A	N/A	N/A	N/A	N/A	N/A	N/A	N/A	N/A	N/A	N/A	N/A	N/A	N/A	N/A	Y	N/A	N/A	N/A
N/A	N/A	PPAS0C02310	N/A	N/A	925	N/A	N/A	N/A	N/A	N/A	N	N	N/A	N/A	N	N/A	N/A	N/A	N/A	N/A	N/A	N/A	N/A	N/A	N/A	N/A	N/A	N/A	N/A	N/A	N/A	N	N/A	N/A	N/A
N/A	N/A	PPAS0C02420	N/A	N/A	926	N/A	N/A	N/A	N/A	N/A	Y	N	N/A	N/A	N	N/A	N/A	N/A	N/A	N/A	N/A	N/A	-2.31811	yes	0.335351	no	N/A	N/A	N/A	N/A	N/A	N	N/A	N/A	N/A
N/A	N/A	PPAS0C02460	N/A	N/A	927	N/A	N/A	N/A	N/A	N/A	N	N	N/A	N/A	N	N/A	N/A	N/A	N/A	N/A	N/A	N/A	N/A	N/A	N/A	N/A	N/A	N/A	N/A	N/A	N/A	N	N/A	N/A	N/A
N/A	N/A	PPAS0C02490	N/A	N/A	928	N/A	N/A	N/A	N/A	N/A	N	N	N/A	N/A	N	N/A	N/A	N/A	N/A	N/A	N/A	N/A	7.3846	yes	-2.25482	no	N/A	N/A	N/A	N/A	N/A	N	N/A	N/A	N/A
N/A	N/A	PPAS0C02520	N/A	N/A	929	N/A	N/A	N/A	N/A	N/A	N	N	N/A	N/A	N	N/A	N/A	N/A	N/A	N/A	N/A	N/A	-0.21099	no	0.0482513	no	N/A	N/A	N/A	N/A	N/A	N	N/A	N/A	N/A
N/A	N/A	PPAS0C02570	N/A	N/A	930	N/A	N/A	N/A	N/A	N/A	N	N	N/A	N/A	N	N/A	N/A	N/A	N/A	N/A	N/A	N/A	-2.09121	yes	0.276128	no	N/A	N/A	N/A	N/A	N/A	N	N/A	N/A	N/A
N/A	N/A	PPAS0C02620	N/A	N/A	931	N/A	N/A	N/A	N/A	N/A	Y	N	N/A	N/A	N	N/A	N/A	N/A	N/A	N/A	N/A	N/A	5.21944	yes	-3.68104	yes	N/A	N/A	N/A	N/A	N/A	Y	N/A	N/A	N/A
N/A	N/A	PPAS0C02640	N/A	N/A	932	N/A	N/A	N/A	N/A	N/A	N	N	N/A	N/A	N	N/A	N/A	N/A	N/A	N/A	N/A	N/A	0.135217	no	-0.616317	yes	N/A	N/A	N/A	N/A	N/A	N	N/A	N/A	N/A
N/A	N/A	PPAS0C02650	N/A	N/A	933	N/A	N/A	N/A	N/A	N/A	Y	N	N/A	N/A	N	N/A	N/A	N/A	N/A	N/A	N/A	N/A	N/A	N/A	N/A	N/A	N/A	N/A	N/A	N/A	N/A	Y	N/A	N/A	N/A
N/A	N/A	PPAS0C02660	N/A	N/A	934	N/A	N/A	N/A	N/A	N/A	N	N	N/A	N/A	N	N/A	N/A	N/A	N/A	N/A	N/A	N/A	-0.339255	no	0.0906974	no	N/A	N/A	N/A	N/A	N/A	N	N/A	N/A	N/A
N/A	N/A	PPAS0C02680	N/A	N/A	935	N/A	N/A	N/A	N/A	N/A	N	N	N/A	N/A	N	N/A	N/A	N/A	N/A	N/A	N/A	N/A	0.57159	no	0.0419401	no	N/A	N/A	N/A	N/A	N/A	Y	N/A	N/A	N/A
N/A	N/A	PPAS0C02720	N/A	N/A	936	N/A	N/A	N/A	N/A	N/A	N	N	N/A	N/A	N	N/A	N/A	N/A	N/A	N/A	N/A	N/A	2.54478	yes	-0.0544154	no	N/A	N/A	N/A	N/A	N/A	N	N/A	N/A	N/A
N/A	N/A	PPAS0C02750	N/A	N/A	937	N/A	N/A	N/A	N/A	N/A	N	N	N/A	N/A	N	N/A	N/A	N/A	N/A	N/A	N/A	N/A	1.35719	yes	0.871526	yes	N/A	N/A	N/A	N/A	N/A	N	N/A	N/A	N/A
N/A	N/A	PPAS0C02770	N/A	N/A	938	N/A	N/A	N/A	N/A	N/A	N	N	N/A	N/A	N	N/A	N/A	N/A	N/A	N/A	N/A	N/A	-1.42912	yes	0.389157	no	N/A	N/A	N/A	N/A	N/A	Y	N/A	N/A	N/A
N/A	N/A	PPAS0C02780	N/A	N/A	939	N/A	N/A	N/A	N/A	N/A	N	N	N/A	N/A	N	N/A	N/A	N/A	N/A	N/A	N/A	N/A	0.234079	no	-0.194646	no	N/A	N/A	N/A	N/A	N/A	N	N/A	N/A	N/A
N/A	N/A	PPAS0C02790	N/A	N/A	940	N/A	N/A	N/A	N/A	N/A	N	N	N/A	N/A	N	N/A	N/A	N/A	N/A	N/A	N/A	N/A	1.11747	yes	0.252178	no	N/A	N/A	N/A	N/A	N/A	N	N/A	N/A	N/A
N/A	N/A	PPAS0C02810	N/A	N/A	941	N/A	N/A	N/A	N/A	N/A	N	N	N/A	N/A	N	N/A	N/A	N/A	N/A	N/A	N/A	N/A	-0.500557	no	-0.0787161	no	N/A	N/A	N/A	N/A	N/A	N	N/A	N/A	N/A
N/A	N/A	PPAS0C02820	N/A	N/A	942	N/A	N/A	N/A	N/A	N/A	N	N	N/A	N/A	N	N/A	N/A	N/A	N/A	N/A	N/A	N/A	-0.500557	no	-0.0787161	no	N/A	N/A	N/A	N/A	N/A	N	N/A	N/A	N/A
N/A	N/A	PPAS0C02870	N/A	N/A	943	N/A	N/A	N/A	N/A	N/A	Y	N	N/A	N/A	N	N/A	N/A	N/A	N/A	N/A	N/A	N/A	N/A	N/A	N/A	N/A	N/A	N/A	N/A	N/A	N/A	N	N/A	N/A	N/A
N/A	N/A	PPAS0C02950	N/A	N/A	944	N/A	N/A	N/A	N/A	N/A	N	N	N/A	N/A	N	N/A	N/A	N/A	N/A	N/A	N/A	N/A	N/A	N/A	N/A	N/A	N/A	N/A	N/A	N/A	N/A	N	N/A	N/A	N/A
N/A	N/A	PPAS0C02970	N/A	N/A	945	N/A	N/A	N/A	N/A	N/A	N	N	N/A	N/A	N	N/A	N/A	N/A	N/A	N/A	N/A	N/A	1.52733	no	-1.173	no	N/A	N/A	N/A	N/A	N/A	Y	N/A	N/A	N/A
N/A	N/A	PPAS0C03070	N/A	N/A	946	N/A	N/A	N/A	N/A	N/A	N	N	N/A	N/A	N	N/A	N/A	N/A	N/A	N/A	N/A	N/A	-0.0267817	no	0.147549	no	N/A	N/A	N/A	N/A	N/A	N	N/A	N/A	N/A
N/A	N/A	PPAS0C03120	N/A	N/A	947	N/A	N/A	N/A	N/A	N/A	N	N	N/A	N/A	N	N/A	N/A	N/A	N/A	N/A	N/A	N/A	N/A	N/A	N/A	N/A	N/A	N/A	N/A	N/A	N/A	Y	N/A	N/A	N/A
N/A	N/A	PPAS0C03130	N/A	N/A	948	N/A	N/A	N/A	N/A	N/A	N	N	N/A	N/A	N	N/A	N/A	N/A	N/A	N/A	N/A	N/A	-0.51755	no	-0.339529	no	N/A	N/A	N/A	N/A	N/A	Y	N/A	N/A	N/A
N/A	N/A	PPAS0C03160	N/A	N/A	949	N/A	N/A	N/A	N/A	N/A	Y	N	N/A	N/A	N	N/A	N/A	N/A	N/A	N/A	N/A	N/A	-0.438475	no	-0.0441089	no	N/A	N/A	N/A	N/A	N/A	N	N/A	N/A	N/A
N/A	N/A	PPAS0C03190	N/A	N/A	950	N/A	N/A	N/A	N/A	N/A	Y	N	N/A	N/A	N	N/A	N/A	N/A	N/A	N/A	N/A	N/A	2.63463	yes	0.382353	no	N/A	N/A	N/A	N/A	N/A	Y	N/A	N/A	N/A
N/A	N/A	PPAS0C03210	N/A	N/A	951	N/A	N/A	N/A	N/A	N/A	N	N	N/A	N/A	N	N/A	N/A	N/A	N/A	N/A	N/A	N/A	N/A	N/A	N/A	N/A	N/A	N/A	N/A	N/A	N/A	N	N/A	N/A	N/A
N/A	N/A	PPAS0C03240	N/A	N/A	952	N/A	N/A	N/A	N/A	N/A	Y	N	N/A	N/A	N	N/A	N/A	N/A	N/A	N/A	N/A	N/A	N/A	N/A	N/A	N/A	N/A	N/A	N/A	N/A	N/A	N	N/A	N/A	N/A
N/A	N/A	PPAS0C03300	N/A	N/A	953	N/A	N/A	N/A	N/A	N/A	N	N	N/A	N/A	N	N/A	N/A	N/A	N/A	N/A	N/A	N/A	N/A	N/A	N/A	N/A	N/A	N/A	N/A	N/A	N/A	N	N/A	N/A	N/A
N/A	N/A	PPAS0C03340	N/A	N/A	954	N/A	N/A	N/A	N/A	N/A	N	N	N/A	N/A	N	N/A	N/A	N/A	N/A	N/A	N/A	N/A	-0.45633	no	0.0319827	no	N/A	N/A	N/A	N/A	N/A	N	N/A	N/A	N/A
N/A	N/A	PPAS0C03360	N/A	N/A	955	N/A	N/A	N/A	N/A	N/A	N	N	N/A	N/A	N	N/A	N/A	N/A	N/A	N/A	N/A	N/A	N/A	N/A	N/A	N/A	N/A	N/A	N/A	N/A	N/A	Y	N/A	N/A	N/A
N/A	N/A	PPAS0C03370	N/A	N/A	956	N/A	N/A	N/A	N/A	N/A	N	N	N/A	N/A	N	N/A	N/A	N/A	N/A	N/A	N/A	N/A	0.121368	no	0.270713	no	N/A	N/A	N/A	N/A	N/A	Y	N/A	N/A	N/A
N/A	N/A	PPAS0C03390	N/A	N/A	957	N/A	N/A	N/A	N/A	N/A	N	N	N/A	N/A	N	N/A	N/A	N/A	N/A	N/A	N/A	N/A	1.31106	yes	-0.330835	no	N/A	N/A	N/A	N/A	N/A	N	N/A	N/A	N/A
N/A	N/A	PPAS0C03400	N/A	N/A	958	N/A	N/A	N/A	N/A	N/A	N	N	N/A	N/A	N	N/A	N/A	N/A	N/A	N/A	N/A	N/A	N/A	N/A	N/A	N/A	N/A	N/A	N/A	N/A	N/A	Y	N/A	N/A	N/A
N/A	N/A	PPAS0C03420	N/A	N/A	959	N/A	N/A	N/A	N/A	N/A	Y	N	N/A	N/A	N	N/A	N/A	N/A	N/A	N/A	N/A	N/A	1.32086	yes	-0.29722	no	N/A	N/A	N/A	N/A	N/A	N	N/A	N/A	N/A
N/A	N/A	PPAS0C03460	N/A	N/A	960	N/A	N/A	N/A	N/A	N/A	N	N	N/A	N/A	N	N/A	N/A	N/A	N/A	N/A	N/A	N/A	-1.43725	yes	0.381384	no	N/A	N/A	N/A	N/A	N/A	N	N/A	N/A	N/A
N/A	N/A	PPAS0C03480	N/A	N/A	961	N/A	N/A	N/A	N/A	N/A	Y	N	N/A	N/A	N	N/A	N/A	N/A	N/A	N/A	N/A	N/A	-1.43725	yes	0.381384	no	N/A	N/A	N/A	N/A	N/A	Y	N/A	N/A	N/A
N/A	N/A	PPAS0C03490	N/A	N/A	962	N/A	N/A	N/A	N/A	N/A	Y	N	N/A	N/A	N	N/A	N/A	N/A	N/A	N/A	N/A	N/A	-1.25687	yes	0.158345	no	N/A	N/A	N/A	N/A	N/A	Y	N/A	N/A	N/A
N/A	N/A	PPAS0C03530	N/A	N/A	963	N/A	N/A	N/A	N/A	N/A	N	N	N/A	N/A	N	N/A	N/A	N/A	N/A	N/A	N/A	N/A	0.619981	no	-0.775847	no	N/A	N/A	N/A	N/A	N/A	N	N/A	N/A	N/A
N/A	N/A	PPAS0C03540	N/A	N/A	964	N/A	N/A	N/A	N/A	N/A	N	N	N/A	N/A	N	N/A	N/A	N/A	N/A	N/A	N/A	N/A	N/A	N/A	N/A	N/A	N/A	N/A	N/A	N/A	N/A	N	N/A	N/A	N/A
N/A	N/A	PPAS0C03550	N/A	N/A	965	N/A	N/A	N/A	N/A	N/A	N	N	N/A	N/A	N	N/A	N/A	N/A	N/A	N/A	N/A	N/A	0.660448	no	0.126489	no	N/A	N/A	N/A	N/A	N/A	N	N/A	N/A	N/A
N/A	N/A	PPAS0C03580	N/A	N/A	966	N/A	N/A	N/A	N/A	N/A	Y	N	N/A	N/A	N	N/A	N/A	N/A	N/A	N/A	N/A	N/A	0.943568	no	-1.00508	no	N/A	N/A	N/A	N/A	N/A	N	N/A	N/A	N/A
N/A	N/A	PPAS0C03600	N/A	N/A	967	N/A	N/A	N/A	N/A	N/A	Y	N	N/A	N/A	N	N/A	N/A	N/A	N/A	N/A	N/A	N/A	N/A	N/A	N/A	N/A	N/A	N/A	N/A	N/A	N/A	Y	N/A	N/A	N/A
N/A	N/A	PPAS0C03610	N/A	N/A	968	N/A	N/A	N/A	N/A	N/A	Y	N	N/A	N/A	N	N/A	N/A	N/A	N/A	N/A	N/A	N/A	N/A	N/A	N/A	N/A	N/A	N/A	N/A	N/A	N/A	Y	N/A	N/A	N/A
N/A	N/A	PPAS0C03620	N/A	N/A	969	N/A	N/A	N/A	N/A	N/A	N	N	N/A	N/A	N	N/A	N/A	N/A	N/A	N/A	N/A	N/A	-0.16041	no	0.122984	no	N/A	N/A	N/A	N/A	N/A	N	N/A	N/A	N/A
N/A	N/A	PPAS0C03650	N/A	N/A	970	N/A	N/A	N/A	N/A	N/A	N	N	N/A	N/A	N	N/A	N/A	N/A	N/A	N/A	N/A	N/A	0.699644	no	-1.13128	no	N/A	N/A	N/A	N/A	N/A	Y	N/A	N/A	N/A
N/A	N/A	PPAS0C03670	N/A	N/A	971	N/A	N/A	N/A	N/A	N/A	N	N	N/A	N/A	N	N/A	N/A	N/A	N/A	N/A	N/A	N/A	0.783509	yes	-0.392087	no	N/A	N/A	N/A	N/A	N/A	N	N/A	N/A	N/A
N/A	N/A	PPAS0C03690	N/A	N/A	972	N/A	N/A	N/A	N/A	N/A	N	N	N/A	N/A	N	N/A	N/A	N/A	N/A	N/A	N/A	N/A	-0.886946	no	0.304621	no	N/A	N/A	N/A	N/A	N/A	Y	N/A	N/A	N/A
N/A	N/A	PPAS0C03750	N/A	N/A	973	N/A	N/A	N/A	N/A	N/A	N	N	N/A	N/A	N	N/A	N/A	N/A	N/A	N/A	N/A	N/A	N/A	N/A	N/A	N/A	N/A	N/A	N/A	N/A	N/A	N	N/A	N/A	N/A
N/A	N/A	PPAS0C03790	N/A	N/A	974	N/A	N/A	N/A	N/A	N/A	N	N	N/A	N/A	N	N/A	N/A	N/A	N/A	N/A	N/A	N/A	1.7144	yes	-0.153593	no	N/A	N/A	N/A	N/A	N/A	N	N/A	N/A	N/A
N/A	N/A	PPAS0C03820	N/A	N/A	975	N/A	N/A	N/A	N/A	N/A	Y	N	N/A	N/A	N	N/A	N/A	N/A	N/A	N/A	N/A	N/A	-1.62199	no	0.266987	no	N/A	N/A	N/A	N/A	N/A	N	N/A	N/A	N/A
N/A	N/A	PPAS0C03850	N/A	N/A	976	N/A	N/A	N/A	N/A	N/A	N	N	N/A	N/A	N	N/A	N/A	N/A	N/A	N/A	N/A	N/A	-0.642879	yes	0.303068	no	N/A	N/A	N/A	N/A	N/A	N	N/A	N/A	N/A
N/A	N/A	PPAS0C03880	N/A	N/A	977	N/A	N/A	N/A	N/A	N/A	Y	N	N/A	N/A	N	N/A	N/A	N/A	N/A	N/A	N/A	N/A	N/A	N/A	N/A	N/A	N/A	N/A	N/A	N/A	N/A	N	N/A	N/A	N/A
N/A	N/A	PPAS0C03930	N/A	N/A	978	N/A	N/A	N/A	N/A	N/A	Y	N	N/A	N/A	N	N/A	N/A	N/A	N/A	N/A	N/A	N/A	7.14742	yes	-5.99948	yes	N/A	N/A	N/A	N/A	N/A	N	N/A	N/A	N/A
N/A	N/A	PPAS0C03950	N/A	N/A	979	N/A	N/A	N/A	N/A	N/A	N	N	N/A	N/A	N	N/A	N/A	N/A	N/A	N/A	N/A	N/A	-0.0949223	no	0.467588	no	N/A	N/A	N/A	N/A	N/A	N	N/A	N/A	N/A
N/A	N/A	PPAS0C03980	N/A	N/A	980	N/A	N/A	N/A	N/A	N/A	N	N	N/A	N/A	N	N/A	N/A	N/A	N/A	N/A	N/A	N/A	1.60785	yes	-2.93194	yes	N/A	N/A	N/A	N/A	N/A	Y	N/A	N/A	N/A
N/A	N/A	PPAS0C03990	N/A	N/A	981	N/A	N/A	N/A	N/A	N/A	N	N	N/A	N/A	N	N/A	N/A	N/A	N/A	N/A	N/A	N/A	2.6098	yes	-0.0696916	no	N/A	N/A	N/A	N/A	N/A	Y	N/A	N/A	N/A
N/A	N/A	PPAS0C04000	N/A	N/A	982	N/A	N/A	N/A	N/A	N/A	N	N	N/A	N/A	N	N/A	N/A	N/A	N/A	N/A	N/A	N/A	-0.394392	no	0.18526	no	N/A	N/A	N/A	N/A	N/A	N	N/A	N/A	N/A
N/A	N/A	PPAS0C04040	N/A	N/A	983	N/A	N/A	N/A	N/A	N/A	Y	N	N/A	N/A	N	N/A	N/A	N/A	N/A	N/A	N/A	N/A	N/A	N/A	N/A	N/A	N/A	N/A	N/A	N/A	N/A	N	N/A	N/A	N/A
N/A	N/A	PPAS0C04060	N/A	N/A	984	N/A	N/A	N/A	N/A	N/A	N	N	N/A	N/A	N	N/A	N/A	N/A	N/A	N/A	N/A	N/A	0.274465	no	0.128623	no	N/A	N/A	N/A	N/A	N/A	N	N/A	N/A	N/A
N/A	N/A	PPAS0C04080	N/A	N/A	985	N/A	N/A	N/A	N/A	N/A	N	N	N/A	N/A	N	N/A	N/A	N/A	N/A	N/A	N/A	N/A	-0.648191	no	0.0773644	no	N/A	N/A	N/A	N/A	N/A	N	N/A	N/A	N/A
N/A	N/A	PPAS0C04090	N/A	N/A	986	N/A	N/A	N/A	N/A	N/A	N	N	N/A	N/A	N	N/A	N/A	N/A	N/A	N/A	N/A	N/A	-0.648191	no	0.0773644	no	N/A	N/A	N/A	N/A	N/A	N	N/A	N/A	N/A
N/A	N/A	PPAS0C04120	N/A	N/A	987	N/A	N/A	N/A	N/A	N/A	N	N	N/A	N/A	N	N/A	N/A	N/A	N/A	N/A	N/A	N/A	0.636451	no	0.394108	no	N/A	N/A	N/A	N/A	N/A	N	N/A	N/A	N/A
N/A	N/A	PPAS0C04130	N/A	N/A	988	N/A	N/A	N/A	N/A	N/A	N	N	N/A	N/A	N	N/A	N/A	N/A	N/A	N/A	N/A	N/A	0.636451	no	0.394108	no	N/A	N/A	N/A	N/A	N/A	N	N/A	N/A	N/A
N/A	N/A	PPAS0C04140	N/A	N/A	989	N/A	N/A	N/A	N/A	N/A	Y	N	N/A	N/A	N	N/A	N/A	N/A	N/A	N/A	N/A	N/A	N/A	N/A	N/A	N/A	N/A	N/A	N/A	N/A	N/A	Y	N/A	N/A	N/A
N/A	N/A	PPAS0C04210	N/A	N/A	990	N/A	N/A	N/A	N/A	N/A	Y	N	N/A	N/A	N	N/A	N/A	N/A	N/A	N/A	N/A	N/A	N/A	N/A	N/A	N/A	N/A	N/A	N/A	N/A	N/A	Y	N/A	N/A	N/A
N/A	N/A	PPAS0C04240	N/A	N/A	991	N/A	N/A	N/A	N/A	N/A	N	N	N/A	N/A	N	N/A	N/A	N/A	N/A	N/A	N/A	N/A	-0.0492892	no	0.0535047	no	N/A	N/A	N/A	N/A	N/A	N	N/A	N/A	N/A
N/A	N/A	PPAS0C04280	N/A	N/A	992	N/A	N/A	N/A	N/A	N/A	Y	N	N/A	N/A	N	N/A	N/A	N/A	N/A	N/A	N/A	N/A	1.10492	yes	-0.356849	no	N/A	N/A	N/A	N/A	N/A	Y	N/A	N/A	N/A
N/A	N/A	PPAS0C04310	N/A	N/A	993	N/A	N/A	N/A	N/A	N/A	Y	N	N/A	N/A	N	N/A	N/A	N/A	N/A	N/A	N/A	N/A	-1.59671	yes	-0.282318	no	N/A	N/A	N/A	N/A	N/A	Y	N/A	N/A	N/A
N/A	N/A	PPAS0C04470	N/A	N/A	994	N/A	N/A	N/A	N/A	N/A	N	N	N/A	N/A	N	N/A	N/A	N/A	N/A	N/A	N/A	N/A	N/A	N/A	N/A	N/A	N/A	N/A	N/A	N/A	N/A	N	N/A	N/A	N/A
N/A	N/A	PPAS0C04500	N/A	N/A	995	N/A	N/A	N/A	N/A	N/A	N	N	N/A	N/A	N	N/A	N/A	N/A	N/A	N/A	N/A	N/A	-2.81994	no	0.206002	no	N/A	N/A	N/A	N/A	N/A	N	N/A	N/A	N/A
N/A	N/A	PPAS0C04510	N/A	N/A	996	N/A	N/A	N/A	N/A	N/A	N	N	N/A	N/A	N	N/A	N/A	N/A	N/A	N/A	N/A	N/A	-2.81994	no	0.206002	no	N/A	N/A	N/A	N/A	N/A	N	N/A	N/A	N/A
N/A	N/A	PPAS0C04550	N/A	N/A	997	N/A	N/A	N/A	N/A	N/A	N	N	N/A	N/A	N	N/A	N/A	N/A	N/A	N/A	N/A	N/A	1.5587	no	-0.0699609	no	N/A	N/A	N/A	N/A	N/A	N	N/A	N/A	N/A
N/A	N/A	PPAS0C04630	N/A	N/A	998	N/A	N/A	N/A	N/A	N/A	N	N	N/A	N/A	N	N/A	N/A	N/A	N/A	N/A	N/A	N/A	N/A	N/A	N/A	N/A	N/A	N/A	N/A	N/A	N/A	N	N/A	N/A	N/A
N/A	N/A	PPAS0C04690	N/A	N/A	999	N/A	N/A	N/A	N/A	N/A	Y	N	N/A	N/A	N	N/A	N/A	N/A	N/A	N/A	N/A	N/A	0.46743	no	-0.380044	no	N/A	N/A	N/A	N/A	N/A	N	N/A	N/A	N/A
N/A	N/A	PPAS0C04770	N/A	N/A	1000	N/A	N/A	N/A	N/A	N/A	N	N	N/A	N/A	N	N/A	N/A	N/A	N/A	N/A	N/A	N/A	1.25522	yes	0.277195	no	N/A	N/A	N/A	N/A	N/A	N	N/A	N/A	N/A
N/A	N/A	PPAS0C04800	N/A	N/A	1001	N/A	N/A	N/A	N/A	N/A	N	N	N/A	N/A	N	N/A	N/A	N/A	N/A	N/A	N/A	N/A	-0.913041	no	-0.55635	no	N/A	N/A	N/A	N/A	N/A	N	N/A	N/A	N/A
N/A	N/A	PPAS0C04810	N/A	N/A	1002	N/A	N/A	N/A	N/A	N/A	N	N	N/A	N/A	N	N/A	N/A	N/A	N/A	N/A	N/A	N/A	4.39954	yes	0.0554901	no	N/A	N/A	N/A	N/A	N/A	N	N/A	N/A	N/A
N/A	N/A	PPAS0C04850	N/A	N/A	1003	N/A	N/A	N/A	N/A	N/A	N	N	N/A	N/A	N	N/A	N/A	N/A	N/A	N/A	N/A	N/A	-0.932251	yes	0.0290471	no	N/A	N/A	N/A	N/A	N/A	N	N/A	N/A	N/A
N/A	N/A	PPAS0C04870	N/A	N/A	1004	N/A	N/A	N/A	N/A	N/A	Y	N	N/A	N/A	N	N/A	N/A	N/A	N/A	N/A	N/A	N/A	0.382029	no	-0.338967	no	N/A	N/A	N/A	N/A	N/A	N	N/A	N/A	N/A
N/A	N/A	PPAS0C04950	N/A	N/A	1005	N/A	N/A	N/A	N/A	N/A	N	N	N/A	N/A	N	N/A	N/A	N/A	N/A	N/A	N/A	N/A	0.638511	no	0.396005	no	N/A	N/A	N/A	N/A	N/A	N	N/A	N/A	N/A
N/A	N/A	PPAS0C05020	N/A	N/A	1006	N/A	N/A	N/A	N/A	N/A	Y	N	N/A	N/A	N	N/A	N/A	N/A	N/A	N/A	N/A	N/A	N/A	N/A	N/A	N/A	N/A	N/A	N/A	N/A	N/A	Y	N/A	N/A	N/A
N/A	N/A	PPAS0C05050	N/A	N/A	1007	N/A	N/A	N/A	N/A	N/A	Y	N	N/A	N/A	N	N/A	N/A	N/A	N/A	N/A	N/A	N/A	-2.22591	yes	-0.281673	no	N/A	N/A	N/A	N/A	N/A	Y	N/A	N/A	N/A
N/A	N/A	PPAS0C05060	N/A	N/A	1008	N/A	N/A	N/A	N/A	N/A	Y	N	N/A	N/A	N	N/A	N/A	N/A	N/A	N/A	N/A	N/A	-2.22591	yes	-0.281673	no	N/A	N/A	N/A	N/A	N/A	Y	N/A	N/A	N/A
N/A	N/A	PPAS0C05070	N/A	N/A	1009	N/A	N/A	N/A	N/A	N/A	Y	N	N/A	N/A	N	N/A	N/A	N/A	N/A	N/A	N/A	N/A	0.496811	no	-0.0690925	no	N/A	N/A	N/A	N/A	N/A	Y	N/A	N/A	N/A
N/A	N/A	PPAS0C05110	N/A	N/A	1010	N/A	N/A	N/A	N/A	N/A	N	N	N/A	N/A	N	N/A	N/A	N/A	N/A	N/A	N/A	N/A	0.728032	no	-0.0280787	no	N/A	N/A	N/A	N/A	N/A	Y	N/A	N/A	N/A
N/A	N/A	PPAS0C05120	N/A	N/A	1011	N/A	N/A	N/A	N/A	N/A	N	N	N/A	N/A	N	N/A	N/A	N/A	N/A	N/A	N/A	N/A	N/A	N/A	N/A	N/A	N/A	N/A	N/A	N/A	N/A	N	N/A	N/A	N/A
N/A	N/A	PPAS0C05170	N/A	N/A	1012	N/A	N/A	N/A	N/A	N/A	N	N	N/A	N/A	N	N/A	N/A	N/A	N/A	N/A	N/A	N/A	0.0580641	no	0.272074	no	N/A	N/A	N/A	N/A	N/A	N	N/A	N/A	N/A
N/A	N/A	PPAS0C05200	N/A	N/A	1013	N/A	N/A	N/A	N/A	N/A	N	N	N/A	N/A	N	N/A	N/A	N/A	N/A	N/A	N/A	N/A	0.530901	no	0.240787	no	N/A	N/A	N/A	N/A	N/A	N	N/A	N/A	N/A
N/A	N/A	PPAS0C05240	N/A	N/A	1014	N/A	N/A	N/A	N/A	N/A	Y	N	N/A	N/A	N	N/A	N/A	N/A	N/A	N/A	N/A	N/A	-1.43667	yes	-0.513763	no	N/A	N/A	N/A	N/A	N/A	N	N/A	N/A	N/A
N/A	N/A	PPAS0C05260	N/A	N/A	1015	N/A	N/A	N/A	N/A	N/A	N	N	N/A	N/A	N	N/A	N/A	N/A	N/A	N/A	N/A	N/A	1.70665	yes	0.226624	no	N/A	N/A	N/A	N/A	N/A	N	N/A	N/A	N/A
N/A	N/A	PPAS0C05280	N/A	N/A	1016	N/A	N/A	N/A	N/A	N/A	Y	N	N/A	N/A	N	N/A	N/A	N/A	N/A	N/A	N/A	N/A	-1.47368	yes	0.0866357	no	N/A	N/A	N/A	N/A	N/A	Y	N/A	N/A	N/A
N/A	N/A	PPAS0C05290	N/A	N/A	1017	N/A	N/A	N/A	N/A	N/A	N	N	N/A	N/A	N	N/A	N/A	N/A	N/A	N/A	N/A	N/A	N/A	N/A	N/A	N/A	N/A	N/A	N/A	N/A	N/A	Y	N/A	N/A	N/A
N/A	N/A	PPAS0C05300	N/A	N/A	1018	N/A	N/A	N/A	N/A	N/A	N	N	N/A	N/A	N	N/A	N/A	N/A	N/A	N/A	N/A	N/A	-1.81421	yes	0.207229	no	N/A	N/A	N/A	N/A	N/A	Y	N/A	N/A	N/A
N/A	N/A	PPAS0C05370	N/A	N/A	1019	N/A	N/A	N/A	N/A	N/A	Y	N	N/A	N/A	N	N/A	N/A	N/A	N/A	N/A	N/A	N/A	3.02159	yes	-0.249793	no	N/A	N/A	N/A	N/A	N/A	N	N/A	N/A	N/A
N/A	N/A	PPAS0C05390	N/A	N/A	1020	N/A	N/A	N/A	N/A	N/A	N	N	N/A	N/A	N	N/A	N/A	N/A	N/A	N/A	N/A	N/A	3.02159	yes	-0.249793	no	N/A	N/A	N/A	N/A	N/A	Y	N/A	N/A	N/A
N/A	N/A	PPAS0C05400	N/A	N/A	1021	N/A	N/A	N/A	N/A	N/A	Y	N	N/A	N/A	N	N/A	N/A	N/A	N/A	N/A	N/A	N/A	-0.138365	no	-0.321866	no	N/A	N/A	N/A	N/A	N/A	N	N/A	N/A	N/A
N/A	N/A	PPAS0C05410	N/A	N/A	1022	N/A	N/A	N/A	N/A	N/A	Y	N	N/A	N/A	N	N/A	N/A	N/A	N/A	N/A	N/A	N/A	-1.13304	yes	-0.189616	no	N/A	N/A	N/A	N/A	N/A	N	N/A	N/A	N/A
N/A	N/A	PPAS0C05460	N/A	N/A	1023	N/A	N/A	N/A	N/A	N/A	N	N	N/A	N/A	N	N/A	N/A	N/A	N/A	N/A	N/A	N/A	1.20742	no	-0.0146842	no	N/A	N/A	N/A	N/A	N/A	N	N/A	N/A	N/A
N/A	N/A	PPAS0C05490	N/A	N/A	1024	N/A	N/A	N/A	N/A	N/A	Y	N	N/A	N/A	N	N/A	N/A	N/A	N/A	N/A	N/A	N/A	1.91671	yes	0.0979848	no	N/A	N/A	N/A	N/A	N/A	Y	N/A	N/A	N/A
N/A	N/A	PPAS0C05530	N/A	N/A	1025	N/A	N/A	N/A	N/A	N/A	N	N	N/A	N/A	N	N/A	N/A	N/A	N/A	N/A	N/A	N/A	1.44464	yes	0.347723	no	N/A	N/A	N/A	N/A	N/A	Y	N/A	N/A	N/A
N/A	N/A	PPAS0C05590	N/A	N/A	1026	N/A	N/A	N/A	N/A	N/A	N	N	N/A	N/A	N	N/A	N/A	N/A	N/A	N/A	N/A	N/A	1.27982	yes	0.14881	no	N/A	N/A	N/A	N/A	N/A	N	N/A	N/A	N/A
N/A	N/A	PPAS0C05720	N/A	N/A	1027	N/A	N/A	N/A	N/A	N/A	N	N	N/A	N/A	N	N/A	N/A	N/A	N/A	N/A	N/A	N/A	0.298928	no	0.214572	no	N/A	N/A	N/A	N/A	N/A	N	N/A	N/A	N/A
N/A	N/A	PPAS0C05740	N/A	N/A	1028	N/A	N/A	N/A	N/A	N/A	N	N	N/A	N/A	N	N/A	N/A	N/A	N/A	N/A	N/A	N/A	-0.662846	yes	0.324859	no	N/A	N/A	N/A	N/A	N/A	Y	N/A	N/A	N/A
N/A	N/A	PPAS0C05750	N/A	N/A	1029	N/A	N/A	N/A	N/A	N/A	Y	N	N/A	N/A	N	N/A	N/A	N/A	N/A	N/A	N/A	N/A	-1.19161	yes	0.234781	no	N/A	N/A	N/A	N/A	N/A	Y	N/A	N/A	N/A
N/A	N/A	PPAS0C05760	N/A	N/A	1030	N/A	N/A	N/A	N/A	N/A	N	N	N/A	N/A	N	N/A	N/A	N/A	N/A	N/A	N/A	N/A	2.16691	yes	0.218814	no	N/A	N/A	N/A	N/A	N/A	N	N/A	N/A	N/A
N/A	N/A	PPAS0C05770	N/A	N/A	1031	N/A	N/A	N/A	N/A	N/A	N	N	N/A	N/A	N	N/A	N/A	N/A	N/A	N/A	N/A	N/A	N/A	N/A	N/A	N/A	N/A	N/A	N/A	N/A	N/A	N	N/A	N/A	N/A
N/A	N/A	PPAS0C05810	N/A	N/A	1032	N/A	N/A	N/A	N/A	N/A	Y	N	N/A	N/A	N	N/A	N/A	N/A	N/A	N/A	N/A	N/A	-0.0372895	no	0.328033	no	N/A	N/A	N/A	N/A	N/A	Y	N/A	N/A	N/A
N/A	N/A	PPAS0C05820	N/A	N/A	1033	N/A	N/A	N/A	N/A	N/A	Y	N	N/A	N/A	N	N/A	N/A	N/A	N/A	N/A	N/A	N/A	-0.960512	yes	0.272711	no	N/A	N/A	N/A	N/A	N/A	Y	N/A	N/A	N/A
N/A	N/A	PPAS0C05890	N/A	N/A	1034	N/A	N/A	N/A	N/A	N/A	N	N	N/A	N/A	N	N/A	N/A	N/A	N/A	N/A	N/A	N/A	-2.4413	no	0.207282	no	N/A	N/A	N/A	N/A	N/A	N	N/A	N/A	N/A
N/A	N/A	PPAS0C05900	N/A	N/A	1035	N/A	N/A	N/A	N/A	N/A	N	N	N/A	N/A	N	N/A	N/A	N/A	N/A	N/A	N/A	N/A	-2.4413	no	0.207282	no	N/A	N/A	N/A	N/A	N/A	N	N/A	N/A	N/A
N/A	N/A	PPAS0C05930	N/A	N/A	1036	N/A	N/A	N/A	N/A	N/A	Y	N	N/A	N/A	N	N/A	N/A	N/A	N/A	N/A	N/A	N/A	-0.568805	no	0.228803	no	N/A	N/A	N/A	N/A	N/A	N	N/A	N/A	N/A
N/A	N/A	PPAS0C05940	N/A	N/A	1037	N/A	N/A	N/A	N/A	N/A	N	N	N/A	N/A	N	N/A	N/A	N/A	N/A	N/A	N/A	N/A	3.00389	no	0.290196	no	N/A	N/A	N/A	N/A	N/A	N	N/A	N/A	N/A
N/A	N/A	PPAS0C05950	N/A	N/A	1038	N/A	N/A	N/A	N/A	N/A	N	N	N/A	N/A	N	N/A	N/A	N/A	N/A	N/A	N/A	N/A	1.12614	yes	0.254493	no	N/A	N/A	N/A	N/A	N/A	N	N/A	N/A	N/A
N/A	N/A	PPAS0C05960	N/A	N/A	1039	N/A	N/A	N/A	N/A	N/A	N	N	N/A	N/A	N	N/A	N/A	N/A	N/A	N/A	N/A	N/A	N/A	N/A	N/A	N/A	N/A	N/A	N/A	N/A	N/A	N	N/A	N/A	N/A
N/A	N/A	PPAS0C06080	N/A	N/A	1040	N/A	N/A	N/A	N/A	N/A	Y	N	N/A	N/A	N	N/A	N/A	N/A	N/A	N/A	N/A	N/A	-2.78636	yes	0.161758	no	N/A	N/A	N/A	N/A	N/A	N	N/A	N/A	N/A
N/A	N/A	PPAS0C06090	N/A	N/A	1041	N/A	N/A	N/A	N/A	N/A	N	N	N/A	N/A	N	N/A	N/A	N/A	N/A	N/A	N/A	N/A	1.03397	no	-0.0460131	no	N/A	N/A	N/A	N/A	N/A	N	N/A	N/A	N/A
N/A	N/A	PPAS0C06110	N/A	N/A	1042	N/A	N/A	N/A	N/A	N/A	N	N	N/A	N/A	N	N/A	N/A	N/A	N/A	N/A	N/A	N/A	4.64694	yes	-3.22036	yes	N/A	N/A	N/A	N/A	N/A	N	N/A	N/A	N/A
N/A	N/A	PPAS0C06120	N/A	N/A	1043	N/A	N/A	N/A	N/A	N/A	N	N	N/A	N/A	N	N/A	N/A	N/A	N/A	N/A	N/A	N/A	0.456012	no	-0.257021	no	N/A	N/A	N/A	N/A	N/A	N	N/A	N/A	N/A
N/A	N/A	PPAS0C06190	N/A	N/A	1044	N/A	N/A	N/A	N/A	N/A	Y	N	N/A	N/A	N	N/A	N/A	N/A	N/A	N/A	N/A	N/A	-1.03618	no	0.268113	no	N/A	N/A	N/A	N/A	N/A	Y	N/A	N/A	N/A
N/A	N/A	PPAS0C06270	N/A	N/A	1045	N/A	N/A	N/A	N/A	N/A	Y	N	N/A	N/A	N	N/A	N/A	N/A	N/A	N/A	N/A	N/A	3.17604	yes	-2.34246	yes	N/A	N/A	N/A	N/A	N/A	N	N/A	N/A	N/A
N/A	N/A	PPAS0C06410	N/A	N/A	1046	N/A	N/A	N/A	N/A	N/A	N	N	N/A	N/A	N	N/A	N/A	N/A	N/A	N/A	N/A	N/A	-1.32262	yes	0.4073	no	N/A	N/A	N/A	N/A	N/A	N	N/A	N/A	N/A
N/A	N/A	PPAS0C06450	N/A	N/A	1047	N/A	N/A	N/A	N/A	N/A	N	N	N/A	N/A	N	N/A	N/A	N/A	N/A	N/A	N/A	N/A	-0.837249	yes	0.546518	no	N/A	N/A	N/A	N/A	N/A	N	N/A	N/A	N/A
N/A	N/A	PPAS0C06460	N/A	N/A	1048	N/A	N/A	N/A	N/A	N/A	N	N	N/A	N/A	N	N/A	N/A	N/A	N/A	N/A	N/A	N/A	N/A	N/A	N/A	N/A	N/A	N/A	N/A	N/A	N/A	N	N/A	N/A	N/A
N/A	N/A	PPAS0C06480	N/A	N/A	1049	N/A	N/A	N/A	N/A	N/A	N	N	N/A	N/A	N	N/A	N/A	N/A	N/A	N/A	N/A	N/A	-1.50315	yes	0.204468	no	N/A	N/A	N/A	N/A	N/A	N	N/A	N/A	N/A
N/A	N/A	PPAS0C06500	N/A	N/A	1050	N/A	N/A	N/A	N/A	N/A	N	N	N/A	N/A	N	N/A	N/A	N/A	N/A	N/A	N/A	N/A	0.364884	no	0.372109	no	N/A	N/A	N/A	N/A	N/A	N	N/A	N/A	N/A
N/A	N/A	PPAS0C06540	N/A	N/A	1051	N/A	N/A	N/A	N/A	N/A	N	N	N/A	N/A	N	N/A	N/A	N/A	N/A	N/A	N/A	N/A	2.74442	yes	-0.214682	no	N/A	N/A	N/A	N/A	N/A	N	N/A	N/A	N/A
N/A	N/A	PPAS0C06660	N/A	N/A	1052	N/A	N/A	N/A	N/A	N/A	N	N	N/A	N/A	N	N/A	N/A	N/A	N/A	N/A	N/A	N/A	-0.77693	yes	-0.0236211	no	N/A	N/A	N/A	N/A	N/A	N	N/A	N/A	N/A
N/A	N/A	PPAS0C06700	N/A	N/A	1053	N/A	N/A	N/A	N/A	N/A	N	N	N/A	N/A	N	N/A	N/A	N/A	N/A	N/A	N/A	N/A	0.602686	no	0.381625	no	N/A	N/A	N/A	N/A	N/A	N	N/A	N/A	N/A
N/A	N/A	PPAS0C06730	N/A	N/A	1054	N/A	N/A	N/A	N/A	N/A	N	N	N/A	N/A	N	N/A	N/A	N/A	N/A	N/A	N/A	N/A	N/A	N/A	N/A	N/A	N/A	N/A	N/A	N/A	N/A	N	N/A	N/A	N/A
N/A	N/A	PPAS0C06760	N/A	N/A	1055	N/A	N/A	N/A	N/A	N/A	Y	N	N/A	N/A	N	N/A	N/A	N/A	N/A	N/A	N/A	N/A	N/A	N/A	N/A	N/A	N/A	N/A	N/A	N/A	N/A	Y	N/A	N/A	N/A
N/A	N/A	PPAS0C06830	N/A	N/A	1056	N/A	N/A	N/A	N/A	N/A	N	N	N/A	N/A	N	N/A	N/A	N/A	N/A	N/A	N/A	N/A	2.4791	yes	0.343805	no	N/A	N/A	N/A	N/A	N/A	N	N/A	N/A	N/A
N/A	N/A	PPAS0C06850	N/A	N/A	1057	N/A	N/A	N/A	N/A	N/A	N	N	N/A	N/A	N	N/A	N/A	N/A	N/A	N/A	N/A	N/A	N/A	N/A	N/A	N/A	N/A	N/A	N/A	N/A	N/A	N	N/A	N/A	N/A
N/A	N/A	PPAS0C06860	N/A	N/A	1058	N/A	N/A	N/A	N/A	N/A	N	N	N/A	N/A	N	N/A	N/A	N/A	N/A	N/A	N/A	N/A	3.60692	yes	0.227105	no	N/A	N/A	N/A	N/A	N/A	N	N/A	N/A	N/A
N/A	N/A	PPAS0C06880	N/A	N/A	1059	N/A	N/A	N/A	N/A	N/A	N	N	N/A	N/A	N	N/A	N/A	N/A	N/A	N/A	N/A	N/A	-1.14169	yes	0.0651179	no	N/A	N/A	N/A	N/A	N/A	Y	N/A	N/A	N/A
N/A	N/A	PPAS0C06900	N/A	N/A	1060	N/A	N/A	N/A	N/A	N/A	Y	N	N/A	N/A	N	N/A	N/A	N/A	N/A	N/A	N/A	N/A	0.846952	yes	0.0532745	no	N/A	N/A	N/A	N/A	N/A	N	N/A	N/A	N/A
N/A	N/A	PPAS0C06910	N/A	N/A	1061	N/A	N/A	N/A	N/A	N/A	Y	N	N/A	N/A	N	N/A	N/A	N/A	N/A	N/A	N/A	N/A	-1.48801	yes	0.0757083	no	N/A	N/A	N/A	N/A	N/A	N	N/A	N/A	N/A
N/A	N/A	PPAS0C06940	N/A	N/A	1062	N/A	N/A	N/A	N/A	N/A	N	N	N/A	N/A	N	N/A	N/A	N/A	N/A	N/A	N/A	N/A	-0.20874	no	0.362062	no	N/A	N/A	N/A	N/A	N/A	N	N/A	N/A	N/A
N/A	N/A	PPAS0C06980	N/A	N/A	1063	N/A	N/A	N/A	N/A	N/A	Y	N	N/A	N/A	N	N/A	N/A	N/A	N/A	N/A	N/A	N/A	N/A	N/A	N/A	N/A	N/A	N/A	N/A	N/A	N/A	N	N/A	N/A	N/A
N/A	N/A	PPAS0C07010	N/A	N/A	1064	N/A	N/A	N/A	N/A	N/A	N	N	N/A	N/A	N	N/A	N/A	N/A	N/A	N/A	N/A	N/A	0.730262	no	-0.101526	no	N/A	N/A	N/A	N/A	N/A	N	N/A	N/A	N/A
N/A	N/A	PPAS0C07020	N/A	N/A	1065	N/A	N/A	N/A	N/A	N/A	N	N	N/A	N/A	N	N/A	N/A	N/A	N/A	N/A	N/A	N/A	0.790056	yes	0.456578	no	N/A	N/A	N/A	N/A	N/A	N	N/A	N/A	N/A
N/A	N/A	PPAS0C07030	N/A	N/A	1066	N/A	N/A	N/A	N/A	N/A	N	N	N/A	N/A	N	N/A	N/A	N/A	N/A	N/A	N/A	N/A	N/A	N/A	N/A	N/A	N/A	N/A	N/A	N/A	N/A	N	N/A	N/A	N/A
N/A	N/A	PPAS0C07040	N/A	N/A	1067	N/A	N/A	N/A	N/A	N/A	N	N	N/A	N/A	N	N/A	N/A	N/A	N/A	N/A	N/A	N/A	N/A	N/A	N/A	N/A	N/A	N/A	N/A	N/A	N/A	N	N/A	N/A	N/A
N/A	N/A	PPAS0C07050	N/A	N/A	1068	N/A	N/A	N/A	N/A	N/A	N	N	N/A	N/A	N	N/A	N/A	N/A	N/A	N/A	N/A	N/A	-1.18677	no	-0.000506358	no	N/A	N/A	N/A	N/A	N/A	N	N/A	N/A	N/A
N/A	N/A	PPAS0C07060	N/A	N/A	1069	N/A	N/A	N/A	N/A	N/A	Y	N	N/A	N/A	N	N/A	N/A	N/A	N/A	N/A	N/A	N/A	-1.18677	no	-0.000506358	no	N/A	N/A	N/A	N/A	N/A	N	N/A	N/A	N/A
N/A	N/A	PPAS0C07070	N/A	N/A	1070	N/A	N/A	N/A	N/A	N/A	Y	N	N/A	N/A	N	N/A	N/A	N/A	N/A	N/A	N/A	N/A	-0.0273381	no	-0.100254	no	N/A	N/A	N/A	N/A	N/A	N	N/A	N/A	N/A
N/A	N/A	PPAS0C07090	N/A	N/A	1071	N/A	N/A	N/A	N/A	N/A	Y	N	N/A	N/A	N	N/A	N/A	N/A	N/A	N/A	N/A	N/A	1.22338	no	0.121834	no	N/A	N/A	N/A	N/A	N/A	Y	N/A	N/A	N/A
N/A	N/A	PPAS0C07100	N/A	N/A	1072	N/A	N/A	N/A	N/A	N/A	Y	N	N/A	N/A	N	N/A	N/A	N/A	N/A	N/A	N/A	N/A	0.73051	no	-0.123221	no	N/A	N/A	N/A	N/A	N/A	Y	N/A	N/A	N/A
N/A	N/A	PPAS0C07120	N/A	N/A	1073	N/A	N/A	N/A	N/A	N/A	Y	N	N/A	N/A	N	N/A	N/A	N/A	N/A	N/A	N/A	N/A	0.73051	no	-0.123221	no	N/A	N/A	N/A	N/A	N/A	N	N/A	N/A	N/A
N/A	N/A	PPAS0C07130	N/A	N/A	1074	N/A	N/A	N/A	N/A	N/A	Y	N	N/A	N/A	N	N/A	N/A	N/A	N/A	N/A	N/A	N/A	0.652031	no	0.190716	no	N/A	N/A	N/A	N/A	N/A	N	N/A	N/A	N/A
N/A	N/A	PPAS0C07150	N/A	N/A	1075	N/A	N/A	N/A	N/A	N/A	N	N	N/A	N/A	N	N/A	N/A	N/A	N/A	N/A	N/A	N/A	1.13107	yes	0.237238	no	N/A	N/A	N/A	N/A	N/A	N	N/A	N/A	N/A
N/A	N/A	PPAS0C07170	N/A	N/A	1076	N/A	N/A	N/A	N/A	N/A	N	N	N/A	N/A	N	N/A	N/A	N/A	N/A	N/A	N/A	N/A	1.25169	yes	0.0375467	no	N/A	N/A	N/A	N/A	N/A	N	N/A	N/A	N/A
N/A	N/A	PPAS0C07200	N/A	N/A	1077	N/A	N/A	N/A	N/A	N/A	Y	N	N/A	N/A	N	N/A	N/A	N/A	N/A	N/A	N/A	N/A	-0.10709	no	0.11305	no	N/A	N/A	N/A	N/A	N/A	N	N/A	N/A	N/A
N/A	N/A	PPAS0C07290	N/A	N/A	1078	N/A	N/A	N/A	N/A	N/A	N	N	N/A	N/A	N	N/A	N/A	N/A	N/A	N/A	N/A	N/A	0.496816	no	0.203178	no	N/A	N/A	N/A	N/A	N/A	N	N/A	N/A	N/A
N/A	N/A	PPAS0C07350	N/A	N/A	1079	N/A	N/A	N/A	N/A	N/A	N	N	N/A	N/A	N	N/A	N/A	N/A	N/A	N/A	N/A	N/A	0.794018	yes	0.116968	no	N/A	N/A	N/A	N/A	N/A	N	N/A	N/A	N/A
N/A	N/A	PPAS0C07390	N/A	N/A	1080	N/A	N/A	N/A	N/A	N/A	N	N	N/A	N/A	N	N/A	N/A	N/A	N/A	N/A	N/A	N/A	1.60727	yes	-0.694701	no	N/A	N/A	N/A	N/A	N/A	N	N/A	N/A	N/A
N/A	N/A	PPAS0C07400	N/A	N/A	1081	N/A	N/A	N/A	N/A	N/A	N	N	N/A	N/A	N	N/A	N/A	N/A	N/A	N/A	N/A	N/A	-0.181016	no	-0.696879	no	N/A	N/A	N/A	N/A	N/A	N	N/A	N/A	N/A
N/A	N/A	PPAS0C07510	N/A	N/A	1082	N/A	N/A	N/A	N/A	N/A	Y	N	N/A	N/A	N	N/A	N/A	N/A	N/A	N/A	N/A	N/A	N/A	N/A	N/A	N/A	N/A	N/A	N/A	N/A	N/A	N	N/A	N/A	N/A
N/A	N/A	PPAS0C07520	N/A	N/A	1083	N/A	N/A	N/A	N/A	N/A	N	N	N/A	N/A	N	N/A	N/A	N/A	N/A	N/A	N/A	N/A	N/A	N/A	N/A	N/A	N/A	N/A	N/A	N/A	N/A	N	N/A	N/A	N/A
N/A	N/A	PPAS0C07530	N/A	N/A	1084	N/A	N/A	N/A	N/A	N/A	N	N	N/A	N/A	N	N/A	N/A	N/A	N/A	N/A	N/A	N/A	2.76229	yes	-0.377224	no	N/A	N/A	N/A	N/A	N/A	N	N/A	N/A	N/A
N/A	N/A	PPAS0C07540	N/A	N/A	1085	N/A	N/A	N/A	N/A	N/A	N	N	N/A	N/A	N	N/A	N/A	N/A	N/A	N/A	N/A	N/A	2.19466	yes	-0.273796	no	N/A	N/A	N/A	N/A	N/A	Y	N/A	N/A	N/A
N/A	N/A	PPAS0C07550	N/A	N/A	1086	N/A	N/A	N/A	N/A	N/A	N	N	N/A	N/A	N	N/A	N/A	N/A	N/A	N/A	N/A	N/A	0.351787	no	0.0133274	no	N/A	N/A	N/A	N/A	N/A	N	N/A	N/A	N/A
N/A	N/A	PPAS0C07560	N/A	N/A	1087	N/A	N/A	N/A	N/A	N/A	N	N	N/A	N/A	N	N/A	N/A	N/A	N/A	N/A	N/A	N/A	-0.932362	no	0.287638	no	N/A	N/A	N/A	N/A	N/A	N	N/A	N/A	N/A
N/A	N/A	PPAS0C07610	N/A	N/A	1088	N/A	N/A	N/A	N/A	N/A	N	N	N/A	N/A	N	N/A	N/A	N/A	N/A	N/A	N/A	N/A	-0.316745	no	0.209561	no	N/A	N/A	N/A	N/A	N/A	N	N/A	N/A	N/A
N/A	N/A	PPAS0C07620	N/A	N/A	1089	N/A	N/A	N/A	N/A	N/A	Y	N	N/A	N/A	N	N/A	N/A	N/A	N/A	N/A	N/A	N/A	-0.316745	no	0.209561	no	N/A	N/A	N/A	N/A	N/A	Y	N/A	N/A	N/A
N/A	N/A	PPAS0C07780	N/A	N/A	1090	N/A	N/A	N/A	N/A	N/A	N	N	N/A	N/A	N	N/A	N/A	N/A	N/A	N/A	N/A	N/A	N/A	N/A	N/A	N/A	N/A	N/A	N/A	N/A	N/A	N	N/A	N/A	N/A
N/A	N/A	PPAS0C07790	N/A	N/A	1091	N/A	N/A	N/A	N/A	N/A	N	N	N/A	N/A	N	N/A	N/A	N/A	N/A	N/A	N/A	N/A	0.516762	no	0.263713	no	N/A	N/A	N/A	N/A	N/A	N	N/A	N/A	N/A
N/A	N/A	PPAS0C07860	N/A	N/A	1092	N/A	N/A	N/A	N/A	N/A	N	N	N/A	N/A	N	N/A	N/A	N/A	N/A	N/A	N/A	N/A	-1.57475	no	0.208153	no	N/A	N/A	N/A	N/A	N/A	N	N/A	N/A	N/A
N/A	N/A	PPAS0C07920	N/A	N/A	1093	N/A	N/A	N/A	N/A	N/A	N	N	N/A	N/A	N	N/A	N/A	N/A	N/A	N/A	N/A	N/A	1.04005	no	-0.735318	no	N/A	N/A	N/A	N/A	N/A	N	N/A	N/A	N/A
N/A	N/A	PPAS0C07930	N/A	N/A	1094	N/A	N/A	N/A	N/A	N/A	Y	N	N/A	N/A	N	N/A	N/A	N/A	N/A	N/A	N/A	N/A	3.15238	yes	-0.351384	no	N/A	N/A	N/A	N/A	N/A	N	N/A	N/A	N/A
N/A	N/A	PPAS0C07940	N/A	N/A	1095	N/A	N/A	N/A	N/A	N/A	Y	N	N/A	N/A	N	N/A	N/A	N/A	N/A	N/A	N/A	N/A	N/A	N/A	N/A	N/A	N/A	N/A	N/A	N/A	N/A	N	N/A	N/A	N/A
N/A	N/A	PPAS0C07950	N/A	N/A	1096	N/A	N/A	N/A	N/A	N/A	Y	N	N/A	N/A	N	N/A	N/A	N/A	N/A	N/A	N/A	N/A	-0.0150585	no	-0.0910059	no	N/A	N/A	N/A	N/A	N/A	N	N/A	N/A	N/A
N/A	N/A	PPAS0C07960	N/A	N/A	1097	N/A	N/A	N/A	N/A	N/A	Y	N	N/A	N/A	N	N/A	N/A	N/A	N/A	N/A	N/A	N/A	-1.37901	no	0.0327771	no	N/A	N/A	N/A	N/A	N/A	N	N/A	N/A	N/A
N/A	N/A	PPAS0C07980	N/A	N/A	1098	N/A	N/A	N/A	N/A	N/A	Y	N	N/A	N/A	N	N/A	N/A	N/A	N/A	N/A	N/A	N/A	-1.37901	no	0.0327771	no	N/A	N/A	N/A	N/A	N/A	N	N/A	N/A	N/A
N/A	N/A	PPAS0C07990	N/A	N/A	1099	N/A	N/A	N/A	N/A	N/A	N	N	N/A	N/A	N	N/A	N/A	N/A	N/A	N/A	N/A	N/A	-0.95252	no	-0.0574131	no	N/A	N/A	N/A	N/A	N/A	N	N/A	N/A	N/A
N/A	N/A	PPAS0C08020	N/A	N/A	1100	N/A	N/A	N/A	N/A	N/A	N	N	N/A	N/A	N	N/A	N/A	N/A	N/A	N/A	N/A	N/A	N/A	N/A	N/A	N/A	N/A	N/A	N/A	N/A	N/A	N	N/A	N/A	N/A
N/A	N/A	PPAS0C08220	N/A	N/A	1101	N/A	N/A	N/A	N/A	N/A	N	N	N/A	N/A	N	N/A	N/A	N/A	N/A	N/A	N/A	N/A	N/A	N/A	N/A	N/A	N/A	N/A	N/A	N/A	N/A	N	N/A	N/A	N/A
N/A	N/A	PPAS0C08250	N/A	N/A	1102	N/A	N/A	N/A	N/A	N/A	N	N	N/A	N/A	N	N/A	N/A	N/A	N/A	N/A	N/A	N/A	0.00793935	no	0.493231	no	N/A	N/A	N/A	N/A	N/A	N	N/A	N/A	N/A
N/A	N/A	PPAS0C08260	N/A	N/A	1103	N/A	N/A	N/A	N/A	N/A	N	N	N/A	N/A	N	N/A	N/A	N/A	N/A	N/A	N/A	N/A	0.00793935	no	0.493231	no	N/A	N/A	N/A	N/A	N/A	N	N/A	N/A	N/A
N/A	N/A	PPAS0C08270	N/A	N/A	1104	N/A	N/A	N/A	N/A	N/A	N	N	N/A	N/A	N	N/A	N/A	N/A	N/A	N/A	N/A	N/A	2.0983	yes	-0.479277	no	N/A	N/A	N/A	N/A	N/A	N	N/A	N/A	N/A
N/A	N/A	PPAS0C08280	N/A	N/A	1105	N/A	N/A	N/A	N/A	N/A	Y	N	N/A	N/A	N	N/A	N/A	N/A	N/A	N/A	N/A	N/A	2.0983	yes	-0.479277	no	N/A	N/A	N/A	N/A	N/A	N	N/A	N/A	N/A
N/A	N/A	PPAS0C08290	N/A	N/A	1106	N/A	N/A	N/A	N/A	N/A	N	N	N/A	N/A	N	N/A	N/A	N/A	N/A	N/A	N/A	N/A	2.0983	yes	-0.479277	no	N/A	N/A	N/A	N/A	N/A	N	N/A	N/A	N/A
N/A	N/A	PPAS0C08310	N/A	N/A	1107	N/A	N/A	N/A	N/A	N/A	Y	N	N/A	N/A	N	N/A	N/A	N/A	N/A	N/A	N/A	N/A	2.0983	yes	-0.479277	no	N/A	N/A	N/A	N/A	N/A	Y	N/A	N/A	N/A
N/A	N/A	PPAS0C08320	N/A	N/A	1108	N/A	N/A	N/A	N/A	N/A	Y	N	N/A	N/A	N	N/A	N/A	N/A	N/A	N/A	N/A	N/A	3.43395	no	0.360348	no	N/A	N/A	N/A	N/A	N/A	Y	N/A	N/A	N/A
N/A	N/A	PPAS0C08350	N/A	N/A	1109	N/A	N/A	N/A	N/A	N/A	N	N	N/A	N/A	N	N/A	N/A	N/A	N/A	N/A	N/A	N/A	-0.637192	no	-1.04491	no	N/A	N/A	N/A	N/A	N/A	N	N/A	N/A	N/A
N/A	N/A	PPAS0C08370	N/A	N/A	1110	N/A	N/A	N/A	N/A	N/A	Y	N	N/A	N/A	N	N/A	N/A	N/A	N/A	N/A	N/A	N/A	-0.203613	no	-0.0874651	no	N/A	N/A	N/A	N/A	N/A	Y	N/A	N/A	N/A
N/A	N/A	PPAS0C08380	N/A	N/A	1111	N/A	N/A	N/A	N/A	N/A	N	N	N/A	N/A	N	N/A	N/A	N/A	N/A	N/A	N/A	N/A	N/A	N/A	N/A	N/A	N/A	N/A	N/A	N/A	N/A	N	N/A	N/A	N/A
N/A	N/A	PPAS0C08390	N/A	N/A	1112	N/A	N/A	N/A	N/A	N/A	Y	N	N/A	N/A	N	N/A	N/A	N/A	N/A	N/A	N/A	N/A	N/A	N/A	N/A	N/A	N/A	N/A	N/A	N/A	N/A	N	N/A	N/A	N/A
N/A	N/A	PPAS0C08400	N/A	N/A	1113	N/A	N/A	N/A	N/A	N/A	Y	N	N/A	N/A	N	N/A	N/A	N/A	N/A	N/A	N/A	N/A	-1.12492	yes	-0.106587	no	N/A	N/A	N/A	N/A	N/A	N	N/A	N/A	N/A
N/A	N/A	PPAS0C08470	N/A	N/A	1114	N/A	N/A	N/A	N/A	N/A	N	N	N/A	N/A	N	N/A	N/A	N/A	N/A	N/A	N/A	N/A	-0.659749	yes	0.400316	no	N/A	N/A	N/A	N/A	N/A	N	N/A	N/A	N/A
N/A	N/A	PPAS0C08490	N/A	N/A	1115	N/A	N/A	N/A	N/A	N/A	N	N	N/A	N/A	N	N/A	N/A	N/A	N/A	N/A	N/A	N/A	1.04071	yes	0.424167	no	N/A	N/A	N/A	N/A	N/A	N	N/A	N/A	N/A
N/A	N/A	PPAS0C08500	N/A	N/A	1116	N/A	N/A	N/A	N/A	N/A	N	N	N/A	N/A	N	N/A	N/A	N/A	N/A	N/A	N/A	N/A	1.04071	yes	0.424167	no	N/A	N/A	N/A	N/A	N/A	N	N/A	N/A	N/A
N/A	N/A	PPAS0C08560	N/A	N/A	1117	N/A	N/A	N/A	N/A	N/A	N	N	N/A	N/A	N	N/A	N/A	N/A	N/A	N/A	N/A	N/A	5.33311	yes	-1.37354	yes	N/A	N/A	N/A	N/A	N/A	Y	N/A	N/A	N/A
N/A	N/A	PPAS0C08580	N/A	N/A	1118	N/A	N/A	N/A	N/A	N/A	Y	N	N/A	N/A	N	N/A	N/A	N/A	N/A	N/A	N/A	N/A	2.79259	yes	0.0777508	no	N/A	N/A	N/A	N/A	N/A	Y	N/A	N/A	N/A
N/A	N/A	PPAS0C08680	N/A	N/A	1119	N/A	N/A	N/A	N/A	N/A	N	N	N/A	N/A	N	N/A	N/A	N/A	N/A	N/A	N/A	N/A	N/A	N/A	N/A	N/A	N/A	N/A	N/A	N/A	N/A	N	N/A	N/A	N/A
N/A	N/A	PPAS0C08740	N/A	N/A	1120	N/A	N/A	N/A	N/A	N/A	N	N	N/A	N/A	N	N/A	N/A	N/A	N/A	N/A	N/A	N/A	-0.394347	no	0.227075	no	N/A	N/A	N/A	N/A	N/A	N	N/A	N/A	N/A
N/A	N/A	PPAS0C08760	N/A	N/A	1121	N/A	N/A	N/A	N/A	N/A	N	N	N/A	N/A	N	N/A	N/A	N/A	N/A	N/A	N/A	N/A	1.50739	no	-1.20279	no	N/A	N/A	N/A	N/A	N/A	N	N/A	N/A	N/A
N/A	N/A	PPAS0C08780	N/A	N/A	1122	N/A	N/A	N/A	N/A	N/A	Y	N	N/A	N/A	N	N/A	N/A	N/A	N/A	N/A	N/A	N/A	N/A	N/A	N/A	N/A	N/A	N/A	N/A	N/A	N/A	Y	N/A	N/A	N/A
N/A	N/A	PPAS0C08800	N/A	N/A	1123	N/A	N/A	N/A	N/A	N/A	N	N	N/A	N/A	N	N/A	N/A	N/A	N/A	N/A	N/A	N/A	N/A	N/A	N/A	N/A	N/A	N/A	N/A	N/A	N/A	N	N/A	N/A	N/A
N/A	N/A	PPAS0C08810	N/A	N/A	1124	N/A	N/A	N/A	N/A	N/A	N	N	N/A	N/A	N	N/A	N/A	N/A	N/A	N/A	N/A	N/A	N/A	N/A	N/A	N/A	N/A	N/A	N/A	N/A	N/A	N	N/A	N/A	N/A
N/A	N/A	PPAS0C08830	N/A	N/A	1125	N/A	N/A	N/A	N/A	N/A	N	N	N/A	N/A	N	N/A	N/A	N/A	N/A	N/A	N/A	N/A	0.779516	yes	0.282643	no	N/A	N/A	N/A	N/A	N/A	N	N/A	N/A	N/A
N/A	N/A	PPAS0C08880	N/A	N/A	1126	N/A	N/A	N/A	N/A	N/A	N	N	N/A	N/A	N	N/A	N/A	N/A	N/A	N/A	N/A	N/A	-0.357193	no	0.318703	no	N/A	N/A	N/A	N/A	N/A	N	N/A	N/A	N/A
N/A	N/A	PPAS0C08900	N/A	N/A	1127	N/A	N/A	N/A	N/A	N/A	N	N	N/A	N/A	N	N/A	N/A	N/A	N/A	N/A	N/A	N/A	0.130004	no	-0.27091	no	N/A	N/A	N/A	N/A	N/A	Y	N/A	N/A	N/A
N/A	N/A	PPAS0C08930	N/A	N/A	1128	N/A	N/A	N/A	N/A	N/A	Y	N	N/A	N/A	N	N/A	N/A	N/A	N/A	N/A	N/A	N/A	1.12376	no	0.323587	no	N/A	N/A	N/A	N/A	N/A	N	N/A	N/A	N/A
N/A	N/A	PPAS0C08960	N/A	N/A	1129	N/A	N/A	N/A	N/A	N/A	N	N	N/A	N/A	N	N/A	N/A	N/A	N/A	N/A	N/A	N/A	0.471994	no	-0.0723454	no	N/A	N/A	N/A	N/A	N/A	N	N/A	N/A	N/A
N/A	N/A	PPAS0C09030	N/A	N/A	1130	N/A	N/A	N/A	N/A	N/A	N	N	N/A	N/A	N	N/A	N/A	N/A	N/A	N/A	N/A	N/A	0.832858	yes	0.113001	no	N/A	N/A	N/A	N/A	N/A	N	N/A	N/A	N/A
N/A	N/A	PPAS0C09040	N/A	N/A	1131	N/A	N/A	N/A	N/A	N/A	N	N	N/A	N/A	N	N/A	N/A	N/A	N/A	N/A	N/A	N/A	N/A	N/A	N/A	N/A	N/A	N/A	N/A	N/A	N/A	N	N/A	N/A	N/A
N/A	N/A	PPAS0C09070	N/A	N/A	1132	N/A	N/A	N/A	N/A	N/A	N	N	N/A	N/A	N	N/A	N/A	N/A	N/A	N/A	N/A	N/A	4.10541	yes	-0.122433	no	N/A	N/A	N/A	N/A	N/A	N	N/A	N/A	N/A
N/A	N/A	PPAS0C09110	N/A	N/A	1133	N/A	N/A	N/A	N/A	N/A	N	N	N/A	N/A	N	N/A	N/A	N/A	N/A	N/A	N/A	N/A	2.02843	yes	0.0346708	no	N/A	N/A	N/A	N/A	N/A	N	N/A	N/A	N/A
N/A	N/A	PPAS0C09120	N/A	N/A	1134	N/A	N/A	N/A	N/A	N/A	N	N	N/A	N/A	N	N/A	N/A	N/A	N/A	N/A	N/A	N/A	1.23314	no	-0.60495	no	N/A	N/A	N/A	N/A	N/A	N	N/A	N/A	N/A
N/A	N/A	PPAS0C09200	N/A	N/A	1135	N/A	N/A	N/A	N/A	N/A	Y	N	N/A	N/A	N	N/A	N/A	N/A	N/A	N/A	N/A	N/A	-0.555213	no	0.465649	no	N/A	N/A	N/A	N/A	N/A	Y	N/A	N/A	N/A
N/A	N/A	PPAS0C09210	N/A	N/A	1136	N/A	N/A	N/A	N/A	N/A	Y	N	N/A	N/A	N	N/A	N/A	N/A	N/A	N/A	N/A	N/A	1.79271	yes	0.0415107	no	N/A	N/A	N/A	N/A	N/A	Y	N/A	N/A	N/A
N/A	N/A	PPAS0C09240	N/A	N/A	1137	N/A	N/A	N/A	N/A	N/A	N	N	N/A	N/A	N	N/A	N/A	N/A	N/A	N/A	N/A	N/A	1.54002	yes	0.476135	no	N/A	N/A	N/A	N/A	N/A	Y	N/A	N/A	N/A
N/A	N/A	PPAS0C09250	N/A	N/A	1138	N/A	N/A	N/A	N/A	N/A	N	N	N/A	N/A	N	N/A	N/A	N/A	N/A	N/A	N/A	N/A	2.69711	yes	0.222759	no	N/A	N/A	N/A	N/A	N/A	N	N/A	N/A	N/A
N/A	N/A	PPAS0C09260	N/A	N/A	1139	N/A	N/A	N/A	N/A	N/A	N	N	N/A	N/A	N	N/A	N/A	N/A	N/A	N/A	N/A	N/A	1.73255	yes	-0.362769	no	N/A	N/A	N/A	N/A	N/A	N	N/A	N/A	N/A
N/A	N/A	PPAS0C09310	N/A	N/A	1140	N/A	N/A	N/A	N/A	N/A	Y	N	N/A	N/A	N	N/A	N/A	N/A	N/A	N/A	N/A	N/A	1.64552	yes	0.234591	no	N/A	N/A	N/A	N/A	N/A	N	N/A	N/A	N/A
N/A	N/A	PPAS0C09330	N/A	N/A	1141	N/A	N/A	N/A	N/A	N/A	Y	N	N/A	N/A	N	N/A	N/A	N/A	N/A	N/A	N/A	N/A	N/A	N/A	N/A	N/A	N/A	N/A	N/A	N/A	N/A	N	N/A	N/A	N/A
N/A	N/A	PPAS0C09430	N/A	N/A	1142	N/A	N/A	N/A	N/A	N/A	N	N	N/A	N/A	N	N/A	N/A	N/A	N/A	N/A	N/A	N/A	0.744918	yes	-0.333139	no	N/A	N/A	N/A	N/A	N/A	N	N/A	N/A	N/A
N/A	N/A	PPAS0C09440	N/A	N/A	1143	N/A	N/A	N/A	N/A	N/A	N	N	N/A	N/A	N	N/A	N/A	N/A	N/A	N/A	N/A	N/A	2.03429	yes	-0.0723317	no	N/A	N/A	N/A	N/A	N/A	N	N/A	N/A	N/A
N/A	N/A	PPAS0C09480	N/A	N/A	1144	N/A	N/A	N/A	N/A	N/A	N	N	N/A	N/A	N	N/A	N/A	N/A	N/A	N/A	N/A	N/A	-0.440858	no	0.428404	no	N/A	N/A	N/A	N/A	N/A	N	N/A	N/A	N/A
N/A	N/A	PPAS0C09500	N/A	N/A	1145	N/A	N/A	N/A	N/A	N/A	Y	N	N/A	N/A	N	N/A	N/A	N/A	N/A	N/A	N/A	N/A	N/A	N/A	N/A	N/A	N/A	N/A	N/A	N/A	N/A	Y	N/A	N/A	N/A
N/A	N/A	PPAS0C09510	N/A	N/A	1146	N/A	N/A	N/A	N/A	N/A	N	N	N/A	N/A	N	N/A	N/A	N/A	N/A	N/A	N/A	N/A	1.58482	yes	0.146954	no	N/A	N/A	N/A	N/A	N/A	N	N/A	N/A	N/A
N/A	N/A	PPAS0C09560	N/A	N/A	1147	N/A	N/A	N/A	N/A	N/A	N	N	N/A	N/A	N	N/A	N/A	N/A	N/A	N/A	N/A	N/A	N/A	N/A	N/A	N/A	N/A	N/A	N/A	N/A	N/A	N	N/A	N/A	N/A
N/A	N/A	PPAS0C09580	N/A	N/A	1148	N/A	N/A	N/A	N/A	N/A	N	N	N/A	N/A	N	N/A	N/A	N/A	N/A	N/A	N/A	N/A	2.18621	yes	0.454913	no	N/A	N/A	N/A	N/A	N/A	N	N/A	N/A	N/A
N/A	N/A	PPAS0C09590	N/A	N/A	1149	N/A	N/A	N/A	N/A	N/A	N	N	N/A	N/A	N	N/A	N/A	N/A	N/A	N/A	N/A	N/A	N/A	N/A	N/A	N/A	N/A	N/A	N/A	N/A	N/A	N	N/A	N/A	N/A
N/A	N/A	PPAS0C09610	N/A	N/A	1150	N/A	N/A	N/A	N/A	N/A	N	N	N/A	N/A	N	N/A	N/A	N/A	N/A	N/A	N/A	N/A	-0.735529	no	0.286236	no	N/A	N/A	N/A	N/A	N/A	N	N/A	N/A	N/A
N/A	N/A	PPAS0C09690	N/A	N/A	1151	N/A	N/A	N/A	N/A	N/A	Y	N	N/A	N/A	N	N/A	N/A	N/A	N/A	N/A	N/A	N/A	0.933598	no	0.0836138	no	N/A	N/A	N/A	N/A	N/A	N	N/A	N/A	N/A
N/A	N/A	PPAS0C09700	N/A	N/A	1152	N/A	N/A	N/A	N/A	N/A	N	N	N/A	N/A	N	N/A	N/A	N/A	N/A	N/A	N/A	N/A	-0.513702	no	0.125994	no	N/A	N/A	N/A	N/A	N/A	N	N/A	N/A	N/A
N/A	N/A	PPAS0C09710	N/A	N/A	1153	N/A	N/A	N/A	N/A	N/A	N	N	N/A	N/A	N	N/A	N/A	N/A	N/A	N/A	N/A	N/A	-1.57347	yes	0.337068	no	N/A	N/A	N/A	N/A	N/A	N	N/A	N/A	N/A
N/A	N/A	PPAS0C09790	N/A	N/A	1154	N/A	N/A	N/A	N/A	N/A	Y	N	N/A	N/A	N	N/A	N/A	N/A	N/A	N/A	N/A	N/A	N/A	N/A	N/A	N/A	N/A	N/A	N/A	N/A	N/A	N	N/A	N/A	N/A
N/A	N/A	PPAS0C09840	N/A	N/A	1155	N/A	N/A	N/A	N/A	N/A	Y	N	N/A	N/A	N	N/A	N/A	N/A	N/A	N/A	N/A	N/A	-0.308353	no	-1.05264	yes	N/A	N/A	N/A	N/A	N/A	Y	N/A	N/A	N/A
N/A	N/A	PPAS0C09880	N/A	N/A	1156	N/A	N/A	N/A	N/A	N/A	N	N	N/A	N/A	N	N/A	N/A	N/A	N/A	N/A	N/A	N/A	-2.61671	no	0.208038	no	N/A	N/A	N/A	N/A	N/A	N	N/A	N/A	N/A
N/A	N/A	PPAS0C09920	N/A	N/A	1157	N/A	N/A	N/A	N/A	N/A	Y	N	N/A	N/A	N	N/A	N/A	N/A	N/A	N/A	N/A	N/A	-1.99968	no	0.249371	no	N/A	N/A	N/A	N/A	N/A	N	N/A	N/A	N/A
N/A	N/A	PPAS0C10010	N/A	N/A	1158	N/A	N/A	N/A	N/A	N/A	Y	N	N/A	N/A	N	N/A	N/A	N/A	N/A	N/A	N/A	N/A	-0.799097	no	0.011505	no	N/A	N/A	N/A	N/A	N/A	Y	N/A	N/A	N/A
N/A	N/A	PPAS0C10040	N/A	N/A	1159	N/A	N/A	N/A	N/A	N/A	N	N	N/A	N/A	N	N/A	N/A	N/A	N/A	N/A	N/A	N/A	-1.82401	yes	0.220616	no	N/A	N/A	N/A	N/A	N/A	N	N/A	N/A	N/A
N/A	N/A	PPAS0C10050	N/A	N/A	1160	N/A	N/A	N/A	N/A	N/A	N	N	N/A	N/A	N	N/A	N/A	N/A	N/A	N/A	N/A	N/A	-1.47368	yes	0.200634	no	N/A	N/A	N/A	N/A	N/A	N	N/A	N/A	N/A
N/A	N/A	PPAS0C10060	N/A	N/A	1161	N/A	N/A	N/A	N/A	N/A	N	N	N/A	N/A	N	N/A	N/A	N/A	N/A	N/A	N/A	N/A	0.799103	no	0.0395451	no	N/A	N/A	N/A	N/A	N/A	N	N/A	N/A	N/A
N/A	N/A	PPAS0C10130	N/A	N/A	1162	N/A	N/A	N/A	N/A	N/A	N	N	N/A	N/A	N	N/A	N/A	N/A	N/A	N/A	N/A	N/A	0.869991	yes	0.321336	no	N/A	N/A	N/A	N/A	N/A	N	N/A	N/A	N/A
N/A	N/A	PPAS0C10150	N/A	N/A	1163	N/A	N/A	N/A	N/A	N/A	Y	N	N/A	N/A	N	N/A	N/A	N/A	N/A	N/A	N/A	N/A	-0.882445	yes	0.267726	no	N/A	N/A	N/A	N/A	N/A	N	N/A	N/A	N/A
N/A	N/A	PPAS0C10170	N/A	N/A	1164	N/A	N/A	N/A	N/A	N/A	N	N	N/A	N/A	N	N/A	N/A	N/A	N/A	N/A	N/A	N/A	-1.06758	yes	0.227279	no	N/A	N/A	N/A	N/A	N/A	Y	N/A	N/A	N/A
N/A	N/A	PPAS0C10250	N/A	N/A	1165	N/A	N/A	N/A	N/A	N/A	N	N	N/A	N/A	N	N/A	N/A	N/A	N/A	N/A	N/A	N/A	1.04286	no	-1.25649	no	N/A	N/A	N/A	N/A	N/A	Y	N/A	N/A	N/A
N/A	N/A	PPAS0C10290	N/A	N/A	1166	N/A	N/A	N/A	N/A	N/A	Y	N	N/A	N/A	N	N/A	N/A	N/A	N/A	N/A	N/A	N/A	-1.55552	yes	-0.0666746	no	N/A	N/A	N/A	N/A	N/A	N	N/A	N/A	N/A
N/A	N/A	PPAS0C10320	N/A	N/A	1167	N/A	N/A	N/A	N/A	N/A	Y	N	N/A	N/A	N	N/A	N/A	N/A	N/A	N/A	N/A	N/A	N/A	N/A	N/A	N/A	N/A	N/A	N/A	N/A	N/A	N	N/A	N/A	N/A
N/A	N/A	PPAS0C10340	N/A	N/A	1168	N/A	N/A	N/A	N/A	N/A	N	N	N/A	N/A	N	N/A	N/A	N/A	N/A	N/A	N/A	N/A	-0.251809	no	0.185906	no	N/A	N/A	N/A	N/A	N/A	N	N/A	N/A	N/A
N/A	N/A	PPAS0C10350	N/A	N/A	1169	N/A	N/A	N/A	N/A	N/A	N	N	N/A	N/A	N	N/A	N/A	N/A	N/A	N/A	N/A	N/A	6.18106	yes	-1.52705	no	N/A	N/A	N/A	N/A	N/A	N	N/A	N/A	N/A
N/A	N/A	PPAS0C10380	N/A	N/A	1170	N/A	N/A	N/A	N/A	N/A	N	N	N/A	N/A	N	N/A	N/A	N/A	N/A	N/A	N/A	N/A	0.77085	yes	-0.18996	no	N/A	N/A	N/A	N/A	N/A	N	N/A	N/A	N/A
N/A	N/A	PPAS0C10400	N/A	N/A	1171	N/A	N/A	N/A	N/A	N/A	N	N	N/A	N/A	N	N/A	N/A	N/A	N/A	N/A	N/A	N/A	N/A	N/A	N/A	N/A	N/A	N/A	N/A	N/A	N/A	Y	N/A	N/A	N/A
N/A	N/A	PPAS0C10470	N/A	N/A	1172	N/A	N/A	N/A	N/A	N/A	N	N	N/A	N/A	N	N/A	N/A	N/A	N/A	N/A	N/A	N/A	-1.5885	yes	0.173688	no	N/A	N/A	N/A	N/A	N/A	Y	N/A	N/A	N/A
N/A	N/A	PPAS0C10510	N/A	N/A	1173	N/A	N/A	N/A	N/A	N/A	Y	N	N/A	N/A	N	N/A	N/A	N/A	N/A	N/A	N/A	N/A	0.238402	no	0.212949	no	N/A	N/A	N/A	N/A	N/A	Y	N/A	N/A	N/A
N/A	N/A	PPAS0C10600	N/A	N/A	1174	N/A	N/A	N/A	N/A	N/A	Y	N	N/A	N/A	N	N/A	N/A	N/A	N/A	N/A	N/A	N/A	-0.163378	no	-0.968666	yes	N/A	N/A	N/A	N/A	N/A	N	N/A	N/A	N/A
N/A	N/A	PPAS0C10610	N/A	N/A	1175	N/A	N/A	N/A	N/A	N/A	Y	N	N/A	N/A	N	N/A	N/A	N/A	N/A	N/A	N/A	N/A	N/A	N/A	N/A	N/A	N/A	N/A	N/A	N/A	N/A	N	N/A	N/A	N/A
N/A	N/A	PPAS0C10670	N/A	N/A	1176	N/A	N/A	N/A	N/A	N/A	N	N	N/A	N/A	N	N/A	N/A	N/A	N/A	N/A	N/A	N/A	1.75378	no	-0.00835063	no	N/A	N/A	N/A	N/A	N/A	N	N/A	N/A	N/A
N/A	N/A	PPAS0C10760	N/A	N/A	1177	N/A	N/A	N/A	N/A	N/A	Y	N	N/A	N/A	N	N/A	N/A	N/A	N/A	N/A	N/A	N/A	N/A	N/A	N/A	N/A	N/A	N/A	N/A	N/A	N/A	Y	N/A	N/A	N/A
N/A	N/A	PPAS0C10770	N/A	N/A	1178	N/A	N/A	N/A	N/A	N/A	N	N	N/A	N/A	N	N/A	N/A	N/A	N/A	N/A	N/A	N/A	2.59801	yes	-0.00728301	no	N/A	N/A	N/A	N/A	N/A	Y	N/A	N/A	N/A
N/A	N/A	PPAS0C10800	N/A	N/A	1179	N/A	N/A	N/A	N/A	N/A	Y	N	N/A	N/A	N	N/A	N/A	N/A	N/A	N/A	N/A	N/A	N/A	N/A	N/A	N/A	N/A	N/A	N/A	N/A	N/A	Y	N/A	N/A	N/A
N/A	N/A	PPAS0C10830	N/A	N/A	1180	N/A	N/A	N/A	N/A	N/A	N	N	N/A	N/A	N	N/A	N/A	N/A	N/A	N/A	N/A	N/A	-0.528847	no	0.106771	no	N/A	N/A	N/A	N/A	N/A	N	N/A	N/A	N/A
N/A	N/A	PPAS0C10850	N/A	N/A	1181	N/A	N/A	N/A	N/A	N/A	Y	N	N/A	N/A	N	N/A	N/A	N/A	N/A	N/A	N/A	N/A	-2.74248	yes	-1.6375	no	N/A	N/A	N/A	N/A	N/A	Y	N/A	N/A	N/A
N/A	N/A	PPAS0C10860	N/A	N/A	1182	N/A	N/A	N/A	N/A	N/A	N	N	N/A	N/A	N	N/A	N/A	N/A	N/A	N/A	N/A	N/A	-0.671046	no	0.551671	no	N/A	N/A	N/A	N/A	N/A	N	N/A	N/A	N/A
N/A	N/A	PPAS0C10880	N/A	N/A	1183	N/A	N/A	N/A	N/A	N/A	N	N	N/A	N/A	N	N/A	N/A	N/A	N/A	N/A	N/A	N/A	-0.671046	no	0.551671	no	N/A	N/A	N/A	N/A	N/A	Y	N/A	N/A	N/A
N/A	N/A	PPAS0C10910	N/A	N/A	1184	N/A	N/A	N/A	N/A	N/A	Y	N	N/A	N/A	N	N/A	N/A	N/A	N/A	N/A	N/A	N/A	1.10495	yes	-0.937867	no	N/A	N/A	N/A	N/A	N/A	Y	N/A	N/A	N/A
N/A	N/A	PPAS0C10920	N/A	N/A	1185	N/A	N/A	N/A	N/A	N/A	Y	N	N/A	N/A	N	N/A	N/A	N/A	N/A	N/A	N/A	N/A	0.790124	no	0.0860855	no	N/A	N/A	N/A	N/A	N/A	Y	N/A	N/A	N/A
N/A	N/A	PPAS0C10970	N/A	N/A	1186	N/A	N/A	N/A	N/A	N/A	N	N	N/A	N/A	N	N/A	N/A	N/A	N/A	N/A	N/A	N/A	0.285186	no	0.180404	no	N/A	N/A	N/A	N/A	N/A	N	N/A	N/A	N/A
N/A	N/A	PPAS0C10980	N/A	N/A	1187	N/A	N/A	N/A	N/A	N/A	Y	N	N/A	N/A	N	N/A	N/A	N/A	N/A	N/A	N/A	N/A	0.285186	no	0.180404	no	N/A	N/A	N/A	N/A	N/A	N	N/A	N/A	N/A
N/A	N/A	PPAS0C11000	N/A	N/A	1188	N/A	N/A	N/A	N/A	N/A	N	N	N/A	N/A	N	N/A	N/A	N/A	N/A	N/A	N/A	N/A	2.16255	yes	-0.314716	no	N/A	N/A	N/A	N/A	N/A	N	N/A	N/A	N/A
N/A	N/A	PPAS0C11010	N/A	N/A	1189	N/A	N/A	N/A	N/A	N/A	N	N	N/A	N/A	N	N/A	N/A	N/A	N/A	N/A	N/A	N/A	1.39999	yes	0.0890101	no	N/A	N/A	N/A	N/A	N/A	N	N/A	N/A	N/A
N/A	N/A	PPAS0C11050	N/A	N/A	1190	N/A	N/A	N/A	N/A	N/A	N	N	N/A	N/A	N	N/A	N/A	N/A	N/A	N/A	N/A	N/A	0.0135225	no	0.112117	no	N/A	N/A	N/A	N/A	N/A	N	N/A	N/A	N/A
N/A	N/A	PPAS0C11070	N/A	N/A	1191	N/A	N/A	N/A	N/A	N/A	Y	N	N/A	N/A	N	N/A	N/A	N/A	N/A	N/A	N/A	N/A	-0.433917	no	0.18551	no	N/A	N/A	N/A	N/A	N/A	Y	N/A	N/A	N/A
N/A	N/A	PPAS0C11110	N/A	N/A	1192	N/A	N/A	N/A	N/A	N/A	Y	N	N/A	N/A	N	N/A	N/A	N/A	N/A	N/A	N/A	N/A	0.611473	no	-0.213676	no	N/A	N/A	N/A	N/A	N/A	Y	N/A	N/A	N/A
N/A	N/A	PPAS0C11120	N/A	N/A	1193	N/A	N/A	N/A	N/A	N/A	N	N	N/A	N/A	N	N/A	N/A	N/A	N/A	N/A	N/A	N/A	0.203766	no	0.321878	no	N/A	N/A	N/A	N/A	N/A	Y	N/A	N/A	N/A
N/A	N/A	PPAS0C11160	N/A	N/A	1194	N/A	N/A	N/A	N/A	N/A	N	N	N/A	N/A	N	N/A	N/A	N/A	N/A	N/A	N/A	N/A	N/A	N/A	N/A	N/A	N/A	N/A	N/A	N/A	N/A	N	N/A	N/A	N/A
N/A	N/A	PPAS0C11230	N/A	N/A	1195	N/A	N/A	N/A	N/A	N/A	N	N	N/A	N/A	N	N/A	N/A	N/A	N/A	N/A	N/A	N/A	N/A	N/A	N/A	N/A	N/A	N/A	N/A	N/A	N/A	N	N/A	N/A	N/A
N/A	N/A	PPAS0C11240	N/A	N/A	1196	N/A	N/A	N/A	N/A	N/A	N	N	N/A	N/A	N	N/A	N/A	N/A	N/A	N/A	N/A	N/A	N/A	N/A	N/A	N/A	N/A	N/A	N/A	N/A	N/A	N	N/A	N/A	N/A
N/A	N/A	PPAS0C11250	N/A	N/A	1197	N/A	N/A	N/A	N/A	N/A	N	N	N/A	N/A	N	N/A	N/A	N/A	N/A	N/A	N/A	N/A	N/A	N/A	N/A	N/A	N/A	N/A	N/A	N/A	N/A	N	N/A	N/A	N/A
N/A	N/A	PPAS0C11260	N/A	N/A	1198	N/A	N/A	N/A	N/A	N/A	N	N	N/A	N/A	N	N/A	N/A	N/A	N/A	N/A	N/A	N/A	N/A	N/A	N/A	N/A	N/A	N/A	N/A	N/A	N/A	N	N/A	N/A	N/A
N/A	N/A	PPAS0C11290	N/A	N/A	1199	N/A	N/A	N/A	N/A	N/A	N	N	N/A	N/A	N	N/A	N/A	N/A	N/A	N/A	N/A	N/A	-0.0828267	no	0.249302	no	N/A	N/A	N/A	N/A	N/A	Y	N/A	N/A	N/A
N/A	N/A	PPAS0C11320	N/A	N/A	1200	N/A	N/A	N/A	N/A	N/A	N	N	N/A	N/A	N	N/A	N/A	N/A	N/A	N/A	N/A	N/A	-0.291108	no	-0.220827	no	N/A	N/A	N/A	N/A	N/A	N	N/A	N/A	N/A
N/A	N/A	PPAS0C11380	N/A	N/A	1201	N/A	N/A	N/A	N/A	N/A	Y	N	N/A	N/A	N	N/A	N/A	N/A	N/A	N/A	N/A	N/A	1.64853	yes	-0.656338	yes	N/A	N/A	N/A	N/A	N/A	Y	N/A	N/A	N/A
N/A	N/A	PPAS0C11400	N/A	N/A	1202	N/A	N/A	N/A	N/A	N/A	N	N	N/A	N/A	N	N/A	N/A	N/A	N/A	N/A	N/A	N/A	0.276889	no	0.337081	no	N/A	N/A	N/A	N/A	N/A	N	N/A	N/A	N/A
N/A	N/A	PPAS0C11420	N/A	N/A	1203	N/A	N/A	N/A	N/A	N/A	N	N	N/A	N/A	N	N/A	N/A	N/A	N/A	N/A	N/A	N/A	-0.243496	no	0.168376	no	N/A	N/A	N/A	N/A	N/A	Y	N/A	N/A	N/A
N/A	N/A	PPAS0C11430	N/A	N/A	1204	N/A	N/A	N/A	N/A	N/A	N	N	N/A	N/A	N	N/A	N/A	N/A	N/A	N/A	N/A	N/A	-0.166897	no	0.192214	no	N/A	N/A	N/A	N/A	N/A	Y	N/A	N/A	N/A
N/A	N/A	PPAS0C11440	N/A	N/A	1205	N/A	N/A	N/A	N/A	N/A	Y	N	N/A	N/A	N	N/A	N/A	N/A	N/A	N/A	N/A	N/A	0	no	-0.339982	no	N/A	N/A	N/A	N/A	N/A	Y	N/A	N/A	N/A
N/A	N/A	PPAS0C11470	N/A	N/A	1206	N/A	N/A	N/A	N/A	N/A	N	N	N/A	N/A	N	N/A	N/A	N/A	N/A	N/A	N/A	N/A	2.31977	yes	-0.0577992	no	N/A	N/A	N/A	N/A	N/A	Y	N/A	N/A	N/A
N/A	N/A	PPAS0C11500	N/A	N/A	1207	N/A	N/A	N/A	N/A	N/A	Y	N	N/A	N/A	N	N/A	N/A	N/A	N/A	N/A	N/A	N/A	3.34234	yes	0.424901	no	N/A	N/A	N/A	N/A	N/A	Y	N/A	N/A	N/A
N/A	N/A	PPAS0C11520	N/A	N/A	1208	N/A	N/A	N/A	N/A	N/A	N	N	N/A	N/A	N	N/A	N/A	N/A	N/A	N/A	N/A	N/A	-0.291534	no	0.122492	no	N/A	N/A	N/A	N/A	N/A	N	N/A	N/A	N/A
N/A	N/A	PPAS0C11530	N/A	N/A	1209	N/A	N/A	N/A	N/A	N/A	N	N	N/A	N/A	N	N/A	N/A	N/A	N/A	N/A	N/A	N/A	-0.0549565	no	0.235914	no	N/A	N/A	N/A	N/A	N/A	N	N/A	N/A	N/A
N/A	N/A	PPAS0C11540	N/A	N/A	1210	N/A	N/A	N/A	N/A	N/A	N	N	N/A	N/A	N	N/A	N/A	N/A	N/A	N/A	N/A	N/A	2.59126	yes	0.0457797	no	N/A	N/A	N/A	N/A	N/A	N	N/A	N/A	N/A
N/A	N/A	PPAS0C11550	N/A	N/A	1211	N/A	N/A	N/A	N/A	N/A	N	N	N/A	N/A	N	N/A	N/A	N/A	N/A	N/A	N/A	N/A	2.59126	yes	0.0457797	no	N/A	N/A	N/A	N/A	N/A	N	N/A	N/A	N/A
N/A	N/A	PPAS0C11560	N/A	N/A	1212	N/A	N/A	N/A	N/A	N/A	N	N	N/A	N/A	N	N/A	N/A	N/A	N/A	N/A	N/A	N/A	2.59126	yes	0.0457797	no	N/A	N/A	N/A	N/A	N/A	N	N/A	N/A	N/A
N/A	N/A	PPAS0C11570	N/A	N/A	1213	N/A	N/A	N/A	N/A	N/A	N	N	N/A	N/A	N	N/A	N/A	N/A	N/A	N/A	N/A	N/A	2.59126	yes	0.0457797	no	N/A	N/A	N/A	N/A	N/A	Y	N/A	N/A	N/A
N/A	N/A	PPAS0C11590	N/A	N/A	1214	N/A	N/A	N/A	N/A	N/A	Y	N	N/A	N/A	N	N/A	N/A	N/A	N/A	N/A	N/A	N/A	4.08388	yes	-2.6277	yes	N/A	N/A	N/A	N/A	N/A	Y	N/A	N/A	N/A
N/A	N/A	PPAS0C11610	N/A	N/A	1215	N/A	N/A	N/A	N/A	N/A	N	N	N/A	N/A	N	N/A	N/A	N/A	N/A	N/A	N/A	N/A	-0.0569268	no	-0.497532	no	N/A	N/A	N/A	N/A	N/A	N	N/A	N/A	N/A
N/A	N/A	PPAS0C11620	N/A	N/A	1216	N/A	N/A	N/A	N/A	N/A	Y	N	N/A	N/A	N	N/A	N/A	N/A	N/A	N/A	N/A	N/A	0.693782	no	-0.0447765	no	N/A	N/A	N/A	N/A	N/A	Y	N/A	N/A	N/A
N/A	N/A	PPAS0C11650	N/A	N/A	1217	N/A	N/A	N/A	N/A	N/A	N	N	N/A	N/A	N	N/A	N/A	N/A	N/A	N/A	N/A	N/A	1.72781	no	-1.39498	no	N/A	N/A	N/A	N/A	N/A	Y	N/A	N/A	N/A
N/A	N/A	PPAS0C11760	N/A	N/A	1218	N/A	N/A	N/A	N/A	N/A	Y	N	N/A	N/A	N	N/A	N/A	N/A	N/A	N/A	N/A	N/A	-2.38107	yes	0.0727372	no	N/A	N/A	N/A	N/A	N/A	N	N/A	N/A	N/A
N/A	N/A	PPAS0C11770	N/A	N/A	1219	N/A	N/A	N/A	N/A	N/A	Y	N	N/A	N/A	N	N/A	N/A	N/A	N/A	N/A	N/A	N/A	N/A	N/A	N/A	N/A	N/A	N/A	N/A	N/A	N/A	N	N/A	N/A	N/A
N/A	N/A	PPAS0C11800	N/A	N/A	1220	N/A	N/A	N/A	N/A	N/A	Y	N	N/A	N/A	N	N/A	N/A	N/A	N/A	N/A	N/A	N/A	-2.46528	yes	-0.143128	no	N/A	N/A	N/A	N/A	N/A	Y	N/A	N/A	N/A
N/A	N/A	PPAS0C11840	N/A	N/A	1221	N/A	N/A	N/A	N/A	N/A	Y	N	N/A	N/A	N	N/A	N/A	N/A	N/A	N/A	N/A	N/A	0.359998	no	-0.504977	no	N/A	N/A	N/A	N/A	N/A	Y	N/A	N/A	N/A
N/A	N/A	PPAS0C11850	N/A	N/A	1222	N/A	N/A	N/A	N/A	N/A	N	N	N/A	N/A	N	N/A	N/A	N/A	N/A	N/A	N/A	N/A	0.850835	yes	-0.386938	no	N/A	N/A	N/A	N/A	N/A	N	N/A	N/A	N/A
N/A	N/A	PPAS0C11920	N/A	N/A	1223	N/A	N/A	N/A	N/A	N/A	Y	N	N/A	N/A	N	N/A	N/A	N/A	N/A	N/A	N/A	N/A	N/A	N/A	N/A	N/A	N/A	N/A	N/A	N/A	N/A	N	N/A	N/A	N/A
N/A	N/A	PPAS0C11970	N/A	N/A	1224	N/A	N/A	N/A	N/A	N/A	N	N	N/A	N/A	N	N/A	N/A	N/A	N/A	N/A	N/A	N/A	1.04183	no	-0.420026	no	N/A	N/A	N/A	N/A	N/A	Y	N/A	N/A	N/A
N/A	N/A	PPAS0C11980	N/A	N/A	1225	N/A	N/A	N/A	N/A	N/A	N	N	N/A	N/A	N	N/A	N/A	N/A	N/A	N/A	N/A	N/A	2.33914	no	-0.0910706	no	N/A	N/A	N/A	N/A	N/A	Y	N/A	N/A	N/A
N/A	N/A	PPAS0C11990	N/A	N/A	1226	N/A	N/A	N/A	N/A	N/A	N	N	N/A	N/A	N	N/A	N/A	N/A	N/A	N/A	N/A	N/A	-3.01502	yes	-0.069206	no	N/A	N/A	N/A	N/A	N/A	N	N/A	N/A	N/A
N/A	N/A	PPAS0C12000	N/A	N/A	1227	N/A	N/A	N/A	N/A	N/A	N	N	N/A	N/A	N	N/A	N/A	N/A	N/A	N/A	N/A	N/A	0.10122	no	-0.0498391	no	N/A	N/A	N/A	N/A	N/A	N	N/A	N/A	N/A
N/A	N/A	PPAS0C12010	N/A	N/A	1228	N/A	N/A	N/A	N/A	N/A	N	N	N/A	N/A	N	N/A	N/A	N/A	N/A	N/A	N/A	N/A	0.672013	no	-0.0310932	no	N/A	N/A	N/A	N/A	N/A	N	N/A	N/A	N/A
N/A	N/A	PPAS0C12020	N/A	N/A	1229	N/A	N/A	N/A	N/A	N/A	N	N	N/A	N/A	N	N/A	N/A	N/A	N/A	N/A	N/A	N/A	2.17419	yes	-0.516969	no	N/A	N/A	N/A	N/A	N/A	N	N/A	N/A	N/A
N/A	N/A	PPAS0C12030	N/A	N/A	1230	N/A	N/A	N/A	N/A	N/A	N	N	N/A	N/A	N	N/A	N/A	N/A	N/A	N/A	N/A	N/A	2.17419	yes	-0.516969	no	N/A	N/A	N/A	N/A	N/A	Y	N/A	N/A	N/A
N/A	N/A	PPAS0C12040	N/A	N/A	1231	N/A	N/A	N/A	N/A	N/A	N	N	N/A	N/A	N	N/A	N/A	N/A	N/A	N/A	N/A	N/A	2.17419	yes	-0.516969	no	N/A	N/A	N/A	N/A	N/A	N	N/A	N/A	N/A
N/A	N/A	PPAS0C12050	N/A	N/A	1232	N/A	N/A	N/A	N/A	N/A	Y	N	N/A	N/A	N	N/A	N/A	N/A	N/A	N/A	N/A	N/A	N/A	N/A	N/A	N/A	N/A	N/A	N/A	N/A	N/A	Y	N/A	N/A	N/A
N/A	N/A	PPAS0C12060	N/A	N/A	1233	N/A	N/A	N/A	N/A	N/A	Y	N	N/A	N/A	N	N/A	N/A	N/A	N/A	N/A	N/A	N/A	0.846224	no	0.0711277	no	N/A	N/A	N/A	N/A	N/A	Y	N/A	N/A	N/A
N/A	N/A	PPAS0C12070	N/A	N/A	1234	N/A	N/A	N/A	N/A	N/A	N	N	N/A	N/A	N	N/A	N/A	N/A	N/A	N/A	N/A	N/A	0.846224	no	0.0711277	no	N/A	N/A	N/A	N/A	N/A	Y	N/A	N/A	N/A
N/A	N/A	PPAS0C12080	N/A	N/A	1235	N/A	N/A	N/A	N/A	N/A	N	N	N/A	N/A	N	N/A	N/A	N/A	N/A	N/A	N/A	N/A	0.846224	no	0.0711277	no	N/A	N/A	N/A	N/A	N/A	N	N/A	N/A	N/A
N/A	N/A	PPAS0C12090	N/A	N/A	1236	N/A	N/A	N/A	N/A	N/A	N	N	N/A	N/A	N	N/A	N/A	N/A	N/A	N/A	N/A	N/A	-0.10867	no	-0.0386764	no	N/A	N/A	N/A	N/A	N/A	N	N/A	N/A	N/A
N/A	N/A	PPAS0C12110	N/A	N/A	1237	N/A	N/A	N/A	N/A	N/A	N	N	N/A	N/A	N	N/A	N/A	N/A	N/A	N/A	N/A	N/A	-1.91631	yes	-0.112822	no	N/A	N/A	N/A	N/A	N/A	N	N/A	N/A	N/A
N/A	N/A	PPAS0C12130	N/A	N/A	1238	N/A	N/A	N/A	N/A	N/A	N	N	N/A	N/A	N	N/A	N/A	N/A	N/A	N/A	N/A	N/A	-1.3029	no	0.099532	no	N/A	N/A	N/A	N/A	N/A	Y	N/A	N/A	N/A
N/A	N/A	PPAS0C12140	N/A	N/A	1239	N/A	N/A	N/A	N/A	N/A	N	N	N/A	N/A	N	N/A	N/A	N/A	N/A	N/A	N/A	N/A	-2.62749	yes	0.0742708	no	N/A	N/A	N/A	N/A	N/A	Y	N/A	N/A	N/A
N/A	N/A	PPAS0C12150	N/A	N/A	1240	N/A	N/A	N/A	N/A	N/A	N	N	N/A	N/A	N	N/A	N/A	N/A	N/A	N/A	N/A	N/A	3.44653	yes	-0.435541	no	N/A	N/A	N/A	N/A	N/A	Y	N/A	N/A	N/A
N/A	N/A	PPAS0C12160	N/A	N/A	1241	N/A	N/A	N/A	N/A	N/A	N	N	N/A	N/A	N	N/A	N/A	N/A	N/A	N/A	N/A	N/A	-0.230534	no	-0.044226	no	N/A	N/A	N/A	N/A	N/A	Y	N/A	N/A	N/A
N/A	N/A	PPAS0D00100	N/A	N/A	1242	N/A	N/A	N/A	N/A	N/A	Y	N	N/A	N/A	N	N/A	N/A	N/A	N/A	N/A	N/A	N/A	1.79769e+308	no	-1.91108	no	N/A	N/A	N/A	N/A	N/A	Y	N/A	N/A	N/A
N/A	N/A	PPAS0D00110	N/A	N/A	1243	N/A	N/A	N/A	N/A	N/A	Y	N	N/A	N/A	N	N/A	N/A	N/A	N/A	N/A	N/A	N/A	5.57614	yes	0.0290611	no	N/A	N/A	N/A	N/A	N/A	Y	N/A	N/A	N/A
N/A	N/A	PPAS0D00120	N/A	N/A	1244	N/A	N/A	N/A	N/A	N/A	Y	N	N/A	N/A	N	N/A	N/A	N/A	N/A	N/A	N/A	N/A	3.80501	yes	-0.0855546	no	N/A	N/A	N/A	N/A	N/A	Y	N/A	N/A	N/A
N/A	N/A	PPAS0D00160	N/A	N/A	1245	N/A	N/A	N/A	N/A	N/A	N	N	N/A	N/A	N	N/A	N/A	N/A	N/A	N/A	N/A	N/A	-0.239546	no	-0.11532	no	N/A	N/A	N/A	N/A	N/A	Y	N/A	N/A	N/A
N/A	N/A	PPAS0D00170	N/A	N/A	1246	N/A	N/A	N/A	N/A	N/A	N	N	N/A	N/A	N	N/A	N/A	N/A	N/A	N/A	N/A	N/A	-0.955229	no	-0.173203	no	N/A	N/A	N/A	N/A	N/A	Y	N/A	N/A	N/A
N/A	N/A	PPAS0D00210	N/A	N/A	1247	N/A	N/A	N/A	N/A	N/A	Y	N	N/A	N/A	N	N/A	N/A	N/A	N/A	N/A	N/A	N/A	4.96226	yes	-5.51542	yes	N/A	N/A	N/A	N/A	N/A	Y	N/A	N/A	N/A
N/A	N/A	PPAS0D00220	N/A	N/A	1248	N/A	N/A	N/A	N/A	N/A	Y	N	N/A	N/A	N	N/A	N/A	N/A	N/A	N/A	N/A	N/A	2.81858	yes	-2.38055	no	N/A	N/A	N/A	N/A	N/A	N	N/A	N/A	N/A
N/A	N/A	PPAS0D00250	N/A	N/A	1249	N/A	N/A	N/A	N/A	N/A	Y	N	N/A	N/A	N	N/A	N/A	N/A	N/A	N/A	N/A	N/A	-2.01926	yes	0.126165	no	N/A	N/A	N/A	N/A	N/A	N	N/A	N/A	N/A
N/A	N/A	PPAS0D00280	N/A	N/A	1250	N/A	N/A	N/A	N/A	N/A	N	N	N/A	N/A	N	N/A	N/A	N/A	N/A	N/A	N/A	N/A	0.352548	no	0.279456	no	N/A	N/A	N/A	N/A	N/A	N	N/A	N/A	N/A
N/A	N/A	PPAS0D00310	N/A	N/A	1251	N/A	N/A	N/A	N/A	N/A	N	N	N/A	N/A	N	N/A	N/A	N/A	N/A	N/A	N/A	N/A	-1.17202	yes	0.412435	no	N/A	N/A	N/A	N/A	N/A	Y	N/A	N/A	N/A
N/A	N/A	PPAS0D00330	N/A	N/A	1252	N/A	N/A	N/A	N/A	N/A	N	N	N/A	N/A	N	N/A	N/A	N/A	N/A	N/A	N/A	N/A	-0.0242612	no	-0.0572943	no	N/A	N/A	N/A	N/A	N/A	N	N/A	N/A	N/A
N/A	N/A	PPAS0D00340	N/A	N/A	1253	N/A	N/A	N/A	N/A	N/A	N	N	N/A	N/A	N	N/A	N/A	N/A	N/A	N/A	N/A	N/A	0	no	-0.0171628	no	N/A	N/A	N/A	N/A	N/A	N	N/A	N/A	N/A
N/A	N/A	PPAS0D00440	N/A	N/A	1254	N/A	N/A	N/A	N/A	N/A	N	N	N/A	N/A	N	N/A	N/A	N/A	N/A	N/A	N/A	N/A	N/A	N/A	N/A	N/A	N/A	N/A	N/A	N/A	N/A	N	N/A	N/A	N/A
N/A	N/A	PPAS0D00490	N/A	N/A	1255	N/A	N/A	N/A	N/A	N/A	N	N	N/A	N/A	N	N/A	N/A	N/A	N/A	N/A	N/A	N/A	2.89037	yes	-1.40903	yes	N/A	N/A	N/A	N/A	N/A	Y	N/A	N/A	N/A
N/A	N/A	PPAS0D00530	N/A	N/A	1256	N/A	N/A	N/A	N/A	N/A	N	N	N/A	N/A	N	N/A	N/A	N/A	N/A	N/A	N/A	N/A	0.0493502	no	-0.415271	no	N/A	N/A	N/A	N/A	N/A	N	N/A	N/A	N/A
N/A	N/A	PPAS0D00610	N/A	N/A	1257	N/A	N/A	N/A	N/A	N/A	N	N	N/A	N/A	N	N/A	N/A	N/A	N/A	N/A	N/A	N/A	1.651	yes	0.427003	no	N/A	N/A	N/A	N/A	N/A	N	N/A	N/A	N/A
N/A	N/A	PPAS0D00620	N/A	N/A	1258	N/A	N/A	N/A	N/A	N/A	N	N	N/A	N/A	N	N/A	N/A	N/A	N/A	N/A	N/A	N/A	0.535888	no	-0.0287137	no	N/A	N/A	N/A	N/A	N/A	N	N/A	N/A	N/A
N/A	N/A	PPAS0D00630	N/A	N/A	1259	N/A	N/A	N/A	N/A	N/A	N	N	N/A	N/A	N	N/A	N/A	N/A	N/A	N/A	N/A	N/A	0.478891	no	-0.390653	no	N/A	N/A	N/A	N/A	N/A	N	N/A	N/A	N/A
N/A	N/A	PPAS0D00640	N/A	N/A	1260	N/A	N/A	N/A	N/A	N/A	N	N	N/A	N/A	N	N/A	N/A	N/A	N/A	N/A	N/A	N/A	0.205948	no	-1.09863	yes	N/A	N/A	N/A	N/A	N/A	Y	N/A	N/A	N/A
N/A	N/A	PPAS0D00690	N/A	N/A	1261	N/A	N/A	N/A	N/A	N/A	N	N	N/A	N/A	N	N/A	N/A	N/A	N/A	N/A	N/A	N/A	-2.68012	yes	0.00894098	no	N/A	N/A	N/A	N/A	N/A	N	N/A	N/A	N/A
N/A	N/A	PPAS0D00700	N/A	N/A	1262	N/A	N/A	N/A	N/A	N/A	N	N	N/A	N/A	N	N/A	N/A	N/A	N/A	N/A	N/A	N/A	-0.0258674	no	-0.681532	no	N/A	N/A	N/A	N/A	N/A	N	N/A	N/A	N/A
N/A	N/A	PPAS0D00710	N/A	N/A	1263	N/A	N/A	N/A	N/A	N/A	N	N	N/A	N/A	N	N/A	N/A	N/A	N/A	N/A	N/A	N/A	-0.0258674	no	-0.681532	no	N/A	N/A	N/A	N/A	N/A	Y	N/A	N/A	N/A
N/A	N/A	PPAS0D00730	N/A	N/A	1264	N/A	N/A	N/A	N/A	N/A	N	N	N/A	N/A	N	N/A	N/A	N/A	N/A	N/A	N/A	N/A	N/A	N/A	N/A	N/A	N/A	N/A	N/A	N/A	N/A	N	N/A	N/A	N/A
N/A	N/A	PPAS0D00770	N/A	N/A	1265	N/A	N/A	N/A	N/A	N/A	Y	N	N/A	N/A	N	N/A	N/A	N/A	N/A	N/A	N/A	N/A	N/A	N/A	N/A	N/A	N/A	N/A	N/A	N/A	N/A	Y	N/A	N/A	N/A
N/A	N/A	PPAS0D00810	N/A	N/A	1266	N/A	N/A	N/A	N/A	N/A	Y	N	N/A	N/A	N	N/A	N/A	N/A	N/A	N/A	N/A	N/A	0	no	0	no	N/A	N/A	N/A	N/A	N/A	Y	N/A	N/A	N/A
N/A	N/A	PPAS0D00860	N/A	N/A	1267	N/A	N/A	N/A	N/A	N/A	N	N	N/A	N/A	N	N/A	N/A	N/A	N/A	N/A	N/A	N/A	0.908156	yes	-0.236826	no	N/A	N/A	N/A	N/A	N/A	N	N/A	N/A	N/A
N/A	N/A	PPAS0D00970	N/A	N/A	1268	N/A	N/A	N/A	N/A	N/A	N	N	N/A	N/A	N	N/A	N/A	N/A	N/A	N/A	N/A	N/A	N/A	N/A	N/A	N/A	N/A	N/A	N/A	N/A	N/A	N	N/A	N/A	N/A
N/A	N/A	PPAS0D00980	N/A	N/A	1269	N/A	N/A	N/A	N/A	N/A	Y	N	N/A	N/A	N	N/A	N/A	N/A	N/A	N/A	N/A	N/A	1.84443	yes	-0.121135	no	N/A	N/A	N/A	N/A	N/A	Y	N/A	N/A	N/A
N/A	N/A	PPAS0D00990	N/A	N/A	1270	N/A	N/A	N/A	N/A	N/A	Y	N	N/A	N/A	N	N/A	N/A	N/A	N/A	N/A	N/A	N/A	0.376261	no	0.155097	no	N/A	N/A	N/A	N/A	N/A	Y	N/A	N/A	N/A
N/A	N/A	PPAS0D01010	N/A	N/A	1271	N/A	N/A	N/A	N/A	N/A	Y	N	N/A	N/A	N	N/A	N/A	N/A	N/A	N/A	N/A	N/A	3.44787	no	-0.37962	no	N/A	N/A	N/A	N/A	N/A	N	N/A	N/A	N/A
N/A	N/A	PPAS0D01020	N/A	N/A	1272	N/A	N/A	N/A	N/A	N/A	N	N	N/A	N/A	N	N/A	N/A	N/A	N/A	N/A	N/A	N/A	3.44787	no	-0.37962	no	N/A	N/A	N/A	N/A	N/A	N	N/A	N/A	N/A
N/A	N/A	PPAS0D01050	N/A	N/A	1273	N/A	N/A	N/A	N/A	N/A	N	N	N/A	N/A	N	N/A	N/A	N/A	N/A	N/A	N/A	N/A	0.265041	no	0.121994	no	N/A	N/A	N/A	N/A	N/A	Y	N/A	N/A	N/A
N/A	N/A	PPAS0D01060	N/A	N/A	1274	N/A	N/A	N/A	N/A	N/A	N	N	N/A	N/A	N	N/A	N/A	N/A	N/A	N/A	N/A	N/A	0.265041	no	0.121994	no	N/A	N/A	N/A	N/A	N/A	N	N/A	N/A	N/A
N/A	N/A	PPAS0D01080	N/A	N/A	1275	N/A	N/A	N/A	N/A	N/A	Y	N	N/A	N/A	N	N/A	N/A	N/A	N/A	N/A	N/A	N/A	-0.638716	no	-0.166406	no	N/A	N/A	N/A	N/A	N/A	Y	N/A	N/A	N/A
N/A	N/A	PPAS0D01090	N/A	N/A	1276	N/A	N/A	N/A	N/A	N/A	Y	N	N/A	N/A	N	N/A	N/A	N/A	N/A	N/A	N/A	N/A	-0.452598	no	-0.280054	no	N/A	N/A	N/A	N/A	N/A	Y	N/A	N/A	N/A
N/A	N/A	PPAS0D01210	N/A	N/A	1277	N/A	N/A	N/A	N/A	N/A	Y	N	N/A	N/A	N	N/A	N/A	N/A	N/A	N/A	N/A	N/A	-0.511274	no	0	no	N/A	N/A	N/A	N/A	N/A	N	N/A	N/A	N/A
N/A	N/A	PPAS0D01220	N/A	N/A	1278	N/A	N/A	N/A	N/A	N/A	Y	N	N/A	N/A	N	N/A	N/A	N/A	N/A	N/A	N/A	N/A	1.57905	yes	0.0555323	no	N/A	N/A	N/A	N/A	N/A	N	N/A	N/A	N/A
N/A	N/A	PPAS0D01230	N/A	N/A	1279	N/A	N/A	N/A	N/A	N/A	N	N	N/A	N/A	N	N/A	N/A	N/A	N/A	N/A	N/A	N/A	-1.83198	no	0.551097	no	N/A	N/A	N/A	N/A	N/A	N	N/A	N/A	N/A
N/A	N/A	PPAS0D01260	N/A	N/A	1280	N/A	N/A	N/A	N/A	N/A	N	N	N/A	N/A	N	N/A	N/A	N/A	N/A	N/A	N/A	N/A	-0.508361	no	0.148766	no	N/A	N/A	N/A	N/A	N/A	N	N/A	N/A	N/A
N/A	N/A	PPAS0D01270	N/A	N/A	1281	N/A	N/A	N/A	N/A	N/A	Y	N	N/A	N/A	N	N/A	N/A	N/A	N/A	N/A	N/A	N/A	0.300371	no	-0.0974033	no	N/A	N/A	N/A	N/A	N/A	N	N/A	N/A	N/A
N/A	N/A	PPAS0D01310	N/A	N/A	1282	N/A	N/A	N/A	N/A	N/A	N	N	N/A	N/A	N	N/A	N/A	N/A	N/A	N/A	N/A	N/A	2.22539	yes	-0.433863	no	N/A	N/A	N/A	N/A	N/A	N	N/A	N/A	N/A
N/A	N/A	PPAS0D01320	N/A	N/A	1283	N/A	N/A	N/A	N/A	N/A	N	N	N/A	N/A	N	N/A	N/A	N/A	N/A	N/A	N/A	N/A	2.22539	yes	-0.433863	no	N/A	N/A	N/A	N/A	N/A	Y	N/A	N/A	N/A
N/A	N/A	PPAS0D01360	N/A	N/A	1284	N/A	N/A	N/A	N/A	N/A	Y	N	N/A	N/A	N	N/A	N/A	N/A	N/A	N/A	N/A	N/A	0.921281	no	0.0383906	no	N/A	N/A	N/A	N/A	N/A	N	N/A	N/A	N/A
N/A	N/A	PPAS0D01370	N/A	N/A	1285	N/A	N/A	N/A	N/A	N/A	N	N	N/A	N/A	N	N/A	N/A	N/A	N/A	N/A	N/A	N/A	-1.47728	yes	0.56704	no	N/A	N/A	N/A	N/A	N/A	N	N/A	N/A	N/A
N/A	N/A	PPAS0D01470	N/A	N/A	1286	N/A	N/A	N/A	N/A	N/A	N	N	N/A	N/A	N	N/A	N/A	N/A	N/A	N/A	N/A	N/A	N/A	N/A	N/A	N/A	N/A	N/A	N/A	N/A	N/A	N	N/A	N/A	N/A
N/A	N/A	PPAS0D01480	N/A	N/A	1287	N/A	N/A	N/A	N/A	N/A	N	N	N/A	N/A	N	N/A	N/A	N/A	N/A	N/A	N/A	N/A	0.19172	no	0.331239	no	N/A	N/A	N/A	N/A	N/A	N	N/A	N/A	N/A
N/A	N/A	PPAS0D01510	N/A	N/A	1288	N/A	N/A	N/A	N/A	N/A	N	N	N/A	N/A	N	N/A	N/A	N/A	N/A	N/A	N/A	N/A	2.08672	yes	-0.0663671	no	N/A	N/A	N/A	N/A	N/A	N	N/A	N/A	N/A
N/A	N/A	PPAS0D01570	N/A	N/A	1289	N/A	N/A	N/A	N/A	N/A	N	N	N/A	N/A	N	N/A	N/A	N/A	N/A	N/A	N/A	N/A	-2.0858	yes	0.156762	no	N/A	N/A	N/A	N/A	N/A	N	N/A	N/A	N/A
N/A	N/A	PPAS0D01620	N/A	N/A	1290	N/A	N/A	N/A	N/A	N/A	N	N	N/A	N/A	N	N/A	N/A	N/A	N/A	N/A	N/A	N/A	-0.801842	yes	0.0124848	no	N/A	N/A	N/A	N/A	N/A	N	N/A	N/A	N/A
N/A	N/A	PPAS0D01700	N/A	N/A	1291	N/A	N/A	N/A	N/A	N/A	N	N	N/A	N/A	N	N/A	N/A	N/A	N/A	N/A	N/A	N/A	2.36005	yes	-2.67515	yes	N/A	N/A	N/A	N/A	N/A	Y	N/A	N/A	N/A
N/A	N/A	PPAS0D01730	N/A	N/A	1292	N/A	N/A	N/A	N/A	N/A	N	N	N/A	N/A	N	N/A	N/A	N/A	N/A	N/A	N/A	N/A	-0.174275	no	0.445283	no	N/A	N/A	N/A	N/A	N/A	N	N/A	N/A	N/A
N/A	N/A	PPAS0D01800	N/A	N/A	1293	N/A	N/A	N/A	N/A	N/A	N	N	N/A	N/A	N	N/A	N/A	N/A	N/A	N/A	N/A	N/A	-1.08944	no	0.562528	no	N/A	N/A	N/A	N/A	N/A	N	N/A	N/A	N/A
N/A	N/A	PPAS0D01830	N/A	N/A	1294	N/A	N/A	N/A	N/A	N/A	N	N	N/A	N/A	N	N/A	N/A	N/A	N/A	N/A	N/A	N/A	-1.22683	yes	0.302441	no	N/A	N/A	N/A	N/A	N/A	N	N/A	N/A	N/A
N/A	N/A	PPAS0D01840	N/A	N/A	1295	N/A	N/A	N/A	N/A	N/A	N	N	N/A	N/A	N	N/A	N/A	N/A	N/A	N/A	N/A	N/A	-1.22683	yes	0.302441	no	N/A	N/A	N/A	N/A	N/A	N	N/A	N/A	N/A
N/A	N/A	PPAS0D01890	N/A	N/A	1296	N/A	N/A	N/A	N/A	N/A	N	N	N/A	N/A	N	N/A	N/A	N/A	N/A	N/A	N/A	N/A	-0.986102	no	0.0998458	no	N/A	N/A	N/A	N/A	N/A	Y	N/A	N/A	N/A
N/A	N/A	PPAS0D02070	N/A	N/A	1297	N/A	N/A	N/A	N/A	N/A	N	N	N/A	N/A	N	N/A	N/A	N/A	N/A	N/A	N/A	N/A	2.75265	yes	0.47474	no	N/A	N/A	N/A	N/A	N/A	N	N/A	N/A	N/A
N/A	N/A	PPAS0D02080	N/A	N/A	1298	N/A	N/A	N/A	N/A	N/A	Y	N	N/A	N/A	N	N/A	N/A	N/A	N/A	N/A	N/A	N/A	0.629321	no	0.138278	no	N/A	N/A	N/A	N/A	N/A	Y	N/A	N/A	N/A
N/A	N/A	PPAS0D02090	N/A	N/A	1299	N/A	N/A	N/A	N/A	N/A	Y	N	N/A	N/A	N	N/A	N/A	N/A	N/A	N/A	N/A	N/A	1.12055	yes	0.030739	no	N/A	N/A	N/A	N/A	N/A	Y	N/A	N/A	N/A
N/A	N/A	PPAS0D02100	N/A	N/A	1300	N/A	N/A	N/A	N/A	N/A	N	N	N/A	N/A	N	N/A	N/A	N/A	N/A	N/A	N/A	N/A	-1.38038	yes	-0.0186151	no	N/A	N/A	N/A	N/A	N/A	N	N/A	N/A	N/A
N/A	N/A	PPAS0D02110	N/A	N/A	1301	N/A	N/A	N/A	N/A	N/A	N	N	N/A	N/A	N	N/A	N/A	N/A	N/A	N/A	N/A	N/A	3.34856	yes	-2.70911	yes	N/A	N/A	N/A	N/A	N/A	Y	N/A	N/A	N/A
N/A	N/A	PPAS0D02130	N/A	N/A	1302	N/A	N/A	N/A	N/A	N/A	N	N	N/A	N/A	N	N/A	N/A	N/A	N/A	N/A	N/A	N/A	-0.339462	no	0.288341	no	N/A	N/A	N/A	N/A	N/A	N	N/A	N/A	N/A
N/A	N/A	PPAS0D02220	N/A	N/A	1303	N/A	N/A	N/A	N/A	N/A	N	N	N/A	N/A	N	N/A	N/A	N/A	N/A	N/A	N/A	N/A	0.114216	no	0.121366	no	N/A	N/A	N/A	N/A	N/A	N	N/A	N/A	N/A
N/A	N/A	PPAS0D02340	N/A	N/A	1304	N/A	N/A	N/A	N/A	N/A	N	N	N/A	N/A	N	N/A	N/A	N/A	N/A	N/A	N/A	N/A	N/A	N/A	N/A	N/A	N/A	N/A	N/A	N/A	N/A	N	N/A	N/A	N/A
N/A	N/A	PPAS0D02370	N/A	N/A	1305	N/A	N/A	N/A	N/A	N/A	N	N	N/A	N/A	N	N/A	N/A	N/A	N/A	N/A	N/A	N/A	-1.11642	yes	0.136112	no	N/A	N/A	N/A	N/A	N/A	N	N/A	N/A	N/A
N/A	N/A	PPAS0D02410	N/A	N/A	1306	N/A	N/A	N/A	N/A	N/A	N	N	N/A	N/A	N	N/A	N/A	N/A	N/A	N/A	N/A	N/A	-0.426	no	-0.217866	no	N/A	N/A	N/A	N/A	N/A	N	N/A	N/A	N/A
N/A	N/A	PPAS0D02440	N/A	N/A	1307	N/A	N/A	N/A	N/A	N/A	Y	N	N/A	N/A	N	N/A	N/A	N/A	N/A	N/A	N/A	N/A	N/A	N/A	N/A	N/A	N/A	N/A	N/A	N/A	N/A	N	N/A	N/A	N/A
N/A	N/A	PPAS0D02460	N/A	N/A	1308	N/A	N/A	N/A	N/A	N/A	N	N	N/A	N/A	N	N/A	N/A	N/A	N/A	N/A	N/A	N/A	0.763786	no	0.38652	no	N/A	N/A	N/A	N/A	N/A	N	N/A	N/A	N/A
N/A	N/A	PPAS0D02680	N/A	N/A	1309	N/A	N/A	N/A	N/A	N/A	Y	N	N/A	N/A	N	N/A	N/A	N/A	N/A	N/A	N/A	N/A	6.82865	yes	-1.5107	yes	N/A	N/A	N/A	N/A	N/A	Y	N/A	N/A	N/A
N/A	N/A	PPAS0D02700	N/A	N/A	1310	N/A	N/A	N/A	N/A	N/A	N	N	N/A	N/A	N	N/A	N/A	N/A	N/A	N/A	N/A	N/A	N/A	N/A	N/A	N/A	N/A	N/A	N/A	N/A	N/A	N	N/A	N/A	N/A
N/A	N/A	PPAS0D02710	N/A	N/A	1311	N/A	N/A	N/A	N/A	N/A	N	N	N/A	N/A	N	N/A	N/A	N/A	N/A	N/A	N/A	N/A	-0.668529	no	0.394777	no	N/A	N/A	N/A	N/A	N/A	N	N/A	N/A	N/A
N/A	N/A	PPAS0D02750	N/A	N/A	1312	N/A	N/A	N/A	N/A	N/A	N	N	N/A	N/A	N	N/A	N/A	N/A	N/A	N/A	N/A	N/A	5.11357	yes	-3.77462	yes	N/A	N/A	N/A	N/A	N/A	N	N/A	N/A	N/A
N/A	N/A	PPAS0D02780	N/A	N/A	1313	N/A	N/A	N/A	N/A	N/A	N	N	N/A	N/A	N	N/A	N/A	N/A	N/A	N/A	N/A	N/A	-0.821435	no	-1.05068	no	N/A	N/A	N/A	N/A	N/A	N	N/A	N/A	N/A
N/A	N/A	PPAS0D02790	N/A	N/A	1314	N/A	N/A	N/A	N/A	N/A	N	N	N/A	N/A	N	N/A	N/A	N/A	N/A	N/A	N/A	N/A	-0.821435	no	-1.05068	no	N/A	N/A	N/A	N/A	N/A	Y	N/A	N/A	N/A
N/A	N/A	PPAS0D02800	N/A	N/A	1315	N/A	N/A	N/A	N/A	N/A	Y	N	N/A	N/A	N	N/A	N/A	N/A	N/A	N/A	N/A	N/A	N/A	N/A	N/A	N/A	N/A	N/A	N/A	N/A	N/A	Y	N/A	N/A	N/A
N/A	N/A	PPAS0D02810	N/A	N/A	1316	N/A	N/A	N/A	N/A	N/A	Y	N	N/A	N/A	N	N/A	N/A	N/A	N/A	N/A	N/A	N/A	N/A	N/A	N/A	N/A	N/A	N/A	N/A	N/A	N/A	Y	N/A	N/A	N/A
N/A	N/A	PPAS0D02820	N/A	N/A	1317	N/A	N/A	N/A	N/A	N/A	Y	N	N/A	N/A	N	N/A	N/A	N/A	N/A	N/A	N/A	N/A	-1.00823	yes	-0.0342525	no	N/A	N/A	N/A	N/A	N/A	Y	N/A	N/A	N/A
N/A	N/A	PPAS0D02830	N/A	N/A	1318	N/A	N/A	N/A	N/A	N/A	Y	N	N/A	N/A	N	N/A	N/A	N/A	N/A	N/A	N/A	N/A	N/A	N/A	N/A	N/A	N/A	N/A	N/A	N/A	N/A	Y	N/A	N/A	N/A
N/A	N/A	PPAS0D02840	N/A	N/A	1319	N/A	N/A	N/A	N/A	N/A	N	N	N/A	N/A	N	N/A	N/A	N/A	N/A	N/A	N/A	N/A	N/A	N/A	N/A	N/A	N/A	N/A	N/A	N/A	N/A	Y	N/A	N/A	N/A
N/A	N/A	PPAS0D02850	N/A	N/A	1320	N/A	N/A	N/A	N/A	N/A	N	N	N/A	N/A	N	N/A	N/A	N/A	N/A	N/A	N/A	N/A	N/A	N/A	N/A	N/A	N/A	N/A	N/A	N/A	N/A	N	N/A	N/A	N/A
N/A	N/A	PPAS0D02860	N/A	N/A	1321	N/A	N/A	N/A	N/A	N/A	N	N	N/A	N/A	N	N/A	N/A	N/A	N/A	N/A	N/A	N/A	-1.07683	yes	0.334078	no	N/A	N/A	N/A	N/A	N/A	N	N/A	N/A	N/A
N/A	N/A	PPAS0D02870	N/A	N/A	1322	N/A	N/A	N/A	N/A	N/A	N	N	N/A	N/A	N	N/A	N/A	N/A	N/A	N/A	N/A	N/A	-0.616483	yes	0.387554	no	N/A	N/A	N/A	N/A	N/A	N	N/A	N/A	N/A
N/A	N/A	PPAS0D02910	N/A	N/A	1323	N/A	N/A	N/A	N/A	N/A	N	N	N/A	N/A	N	N/A	N/A	N/A	N/A	N/A	N/A	N/A	-0.216985	no	-0.785368	no	N/A	N/A	N/A	N/A	N/A	Y	N/A	N/A	N/A
N/A	N/A	PPAS0D03040	N/A	N/A	1324	N/A	N/A	N/A	N/A	N/A	N	N	N/A	N/A	N	N/A	N/A	N/A	N/A	N/A	N/A	N/A	-1.15234	yes	-0.223336	no	N/A	N/A	N/A	N/A	N/A	N	N/A	N/A	N/A
N/A	N/A	PPAS0D03050	N/A	N/A	1325	N/A	N/A	N/A	N/A	N/A	N	N	N/A	N/A	N	N/A	N/A	N/A	N/A	N/A	N/A	N/A	-1.89158	yes	0.0454837	no	N/A	N/A	N/A	N/A	N/A	N	N/A	N/A	N/A
N/A	N/A	PPAS0D03080	N/A	N/A	1326	N/A	N/A	N/A	N/A	N/A	N	N	N/A	N/A	N	N/A	N/A	N/A	N/A	N/A	N/A	N/A	0.176022	no	0.444751	no	N/A	N/A	N/A	N/A	N/A	N	N/A	N/A	N/A
N/A	N/A	PPAS0D03170	N/A	N/A	1327	N/A	N/A	N/A	N/A	N/A	N	N	N/A	N/A	N	N/A	N/A	N/A	N/A	N/A	N/A	N/A	0.110934	no	-0.205867	no	N/A	N/A	N/A	N/A	N/A	N	N/A	N/A	N/A
N/A	N/A	PPAS0D03180	N/A	N/A	1328	N/A	N/A	N/A	N/A	N/A	N	N	N/A	N/A	N	N/A	N/A	N/A	N/A	N/A	N/A	N/A	-0.461215	no	-0.118514	no	N/A	N/A	N/A	N/A	N/A	N	N/A	N/A	N/A
N/A	N/A	PPAS0D03190	N/A	N/A	1329	N/A	N/A	N/A	N/A	N/A	N	N	N/A	N/A	N	N/A	N/A	N/A	N/A	N/A	N/A	N/A	N/A	N/A	N/A	N/A	N/A	N/A	N/A	N/A	N/A	N	N/A	N/A	N/A
N/A	N/A	PPAS0D03200	N/A	N/A	1330	N/A	N/A	N/A	N/A	N/A	N	N	N/A	N/A	N	N/A	N/A	N/A	N/A	N/A	N/A	N/A	N/A	N/A	N/A	N/A	N/A	N/A	N/A	N/A	N/A	N	N/A	N/A	N/A
N/A	N/A	PPAS0D03210	N/A	N/A	1331	N/A	N/A	N/A	N/A	N/A	N	N	N/A	N/A	N	N/A	N/A	N/A	N/A	N/A	N/A	N/A	0.838996	yes	0.0855406	no	N/A	N/A	N/A	N/A	N/A	N	N/A	N/A	N/A
N/A	N/A	PPAS0D03230	N/A	N/A	1332	N/A	N/A	N/A	N/A	N/A	N	N	N/A	N/A	N	N/A	N/A	N/A	N/A	N/A	N/A	N/A	-2.88014	yes	0.627157	no	N/A	N/A	N/A	N/A	N/A	N	N/A	N/A	N/A
N/A	N/A	PPAS0D03260	N/A	N/A	1333	N/A	N/A	N/A	N/A	N/A	N	N	N/A	N/A	N	N/A	N/A	N/A	N/A	N/A	N/A	N/A	0.473327	no	0.308856	no	N/A	N/A	N/A	N/A	N/A	Y	N/A	N/A	N/A
N/A	N/A	PPAS0D03270	N/A	N/A	1334	N/A	N/A	N/A	N/A	N/A	N	N	N/A	N/A	N	N/A	N/A	N/A	N/A	N/A	N/A	N/A	N/A	N/A	N/A	N/A	N/A	N/A	N/A	N/A	N/A	Y	N/A	N/A	N/A
N/A	N/A	PPAS0D03320	N/A	N/A	1335	N/A	N/A	N/A	N/A	N/A	N	N	N/A	N/A	N	N/A	N/A	N/A	N/A	N/A	N/A	N/A	N/A	N/A	N/A	N/A	N/A	N/A	N/A	N/A	N/A	N	N/A	N/A	N/A
N/A	N/A	PPAS0D03330	N/A	N/A	1336	N/A	N/A	N/A	N/A	N/A	N	N	N/A	N/A	N	N/A	N/A	N/A	N/A	N/A	N/A	N/A	-0.732392	yes	0.148262	no	N/A	N/A	N/A	N/A	N/A	N	N/A	N/A	N/A
N/A	N/A	PPAS0D03380	N/A	N/A	1337	N/A	N/A	N/A	N/A	N/A	N	N	N/A	N/A	N	N/A	N/A	N/A	N/A	N/A	N/A	N/A	N/A	N/A	N/A	N/A	N/A	N/A	N/A	N/A	N/A	N	N/A	N/A	N/A
N/A	N/A	PPAS0D03400	N/A	N/A	1338	N/A	N/A	N/A	N/A	N/A	Y	N	N/A	N/A	N	N/A	N/A	N/A	N/A	N/A	N/A	N/A	-4.08722	yes	-0.585032	no	N/A	N/A	N/A	N/A	N/A	Y	N/A	N/A	N/A
N/A	N/A	PPAS0D03410	N/A	N/A	1339	N/A	N/A	N/A	N/A	N/A	N	N	N/A	N/A	N	N/A	N/A	N/A	N/A	N/A	N/A	N/A	N/A	N/A	N/A	N/A	N/A	N/A	N/A	N/A	N/A	N	N/A	N/A	N/A
N/A	N/A	PPAS0D03430	N/A	N/A	1340	N/A	N/A	N/A	N/A	N/A	N	N	N/A	N/A	N	N/A	N/A	N/A	N/A	N/A	N/A	N/A	N/A	N/A	N/A	N/A	N/A	N/A	N/A	N/A	N/A	N	N/A	N/A	N/A
N/A	N/A	PPAS0D03440	N/A	N/A	1341	N/A	N/A	N/A	N/A	N/A	N	N	N/A	N/A	N	N/A	N/A	N/A	N/A	N/A	N/A	N/A	-0.312063	no	0	no	N/A	N/A	N/A	N/A	N/A	N	N/A	N/A	N/A
N/A	N/A	PPAS0D03450	N/A	N/A	1342	N/A	N/A	N/A	N/A	N/A	Y	N	N/A	N/A	N	N/A	N/A	N/A	N/A	N/A	N/A	N/A	0.177559	no	0	no	N/A	N/A	N/A	N/A	N/A	N	N/A	N/A	N/A
N/A	N/A	PPAS0D03480	N/A	N/A	1343	N/A	N/A	N/A	N/A	N/A	N	N	N/A	N/A	N	N/A	N/A	N/A	N/A	N/A	N/A	N/A	N/A	N/A	N/A	N/A	N/A	N/A	N/A	N/A	N/A	N	N/A	N/A	N/A
N/A	N/A	PPAS0D03540	N/A	N/A	1344	N/A	N/A	N/A	N/A	N/A	N	N	N/A	N/A	N	N/A	N/A	N/A	N/A	N/A	N/A	N/A	-0.900537	no	0.487447	no	N/A	N/A	N/A	N/A	N/A	N	N/A	N/A	N/A
N/A	N/A	PPAS0D03580	N/A	N/A	1345	N/A	N/A	N/A	N/A	N/A	Y	N	N/A	N/A	N	N/A	N/A	N/A	N/A	N/A	N/A	N/A	0.614761	no	-0.954012	no	N/A	N/A	N/A	N/A	N/A	Y	N/A	N/A	N/A
N/A	N/A	PPAS0D03600	N/A	N/A	1346	N/A	N/A	N/A	N/A	N/A	N	N	N/A	N/A	N	N/A	N/A	N/A	N/A	N/A	N/A	N/A	0.614761	no	-0.954012	no	N/A	N/A	N/A	N/A	N/A	Y	N/A	N/A	N/A
N/A	N/A	PPAS0D03610	N/A	N/A	1347	N/A	N/A	N/A	N/A	N/A	N	N	N/A	N/A	N	N/A	N/A	N/A	N/A	N/A	N/A	N/A	1.99074	no	-0.230526	no	N/A	N/A	N/A	N/A	N/A	Y	N/A	N/A	N/A
N/A	N/A	PPAS0D03650	N/A	N/A	1348	N/A	N/A	N/A	N/A	N/A	Y	N	N/A	N/A	N	N/A	N/A	N/A	N/A	N/A	N/A	N/A	-0.410685	no	-0.556832	no	N/A	N/A	N/A	N/A	N/A	Y	N/A	N/A	N/A
N/A	N/A	PPAS0D03690	N/A	N/A	1349	N/A	N/A	N/A	N/A	N/A	N	N	N/A	N/A	N	N/A	N/A	N/A	N/A	N/A	N/A	N/A	N/A	N/A	N/A	N/A	N/A	N/A	N/A	N/A	N/A	N	N/A	N/A	N/A
N/A	N/A	PPAS0D03720	N/A	N/A	1350	N/A	N/A	N/A	N/A	N/A	Y	N	N/A	N/A	N	N/A	N/A	N/A	N/A	N/A	N/A	N/A	0.909006	yes	-0.157246	no	N/A	N/A	N/A	N/A	N/A	Y	N/A	N/A	N/A
N/A	N/A	PPAS0D03730	N/A	N/A	1351	N/A	N/A	N/A	N/A	N/A	Y	N	N/A	N/A	N	N/A	N/A	N/A	N/A	N/A	N/A	N/A	7.51784	no	0.282715	no	N/A	N/A	N/A	N/A	N/A	N	N/A	N/A	N/A
N/A	N/A	PPAS0D03740	N/A	N/A	1352	N/A	N/A	N/A	N/A	N/A	N	N	N/A	N/A	N	N/A	N/A	N/A	N/A	N/A	N/A	N/A	-1.43711	yes	0.122153	no	N/A	N/A	N/A	N/A	N/A	N	N/A	N/A	N/A
N/A	N/A	PPAS0D03750	N/A	N/A	1353	N/A	N/A	N/A	N/A	N/A	N	N	N/A	N/A	N	N/A	N/A	N/A	N/A	N/A	N/A	N/A	-1.43711	yes	0.122153	no	N/A	N/A	N/A	N/A	N/A	N	N/A	N/A	N/A
N/A	N/A	PPAS0D03760	N/A	N/A	1354	N/A	N/A	N/A	N/A	N/A	N	N	N/A	N/A	N	N/A	N/A	N/A	N/A	N/A	N/A	N/A	-0.386709	no	-0.00213607	no	N/A	N/A	N/A	N/A	N/A	N	N/A	N/A	N/A
N/A	N/A	PPAS0D03770	N/A	N/A	1355	N/A	N/A	N/A	N/A	N/A	Y	N	N/A	N/A	N	N/A	N/A	N/A	N/A	N/A	N/A	N/A	0.0815127	no	-0.342895	no	N/A	N/A	N/A	N/A	N/A	N	N/A	N/A	N/A
N/A	N/A	PPAS0D03780	N/A	N/A	1356	N/A	N/A	N/A	N/A	N/A	N	N	N/A	N/A	N	N/A	N/A	N/A	N/A	N/A	N/A	N/A	-0.521358	no	0.197954	no	N/A	N/A	N/A	N/A	N/A	N	N/A	N/A	N/A
N/A	N/A	PPAS0D03790	N/A	N/A	1357	N/A	N/A	N/A	N/A	N/A	N	N	N/A	N/A	N	N/A	N/A	N/A	N/A	N/A	N/A	N/A	0.193619	no	-0.0441281	no	N/A	N/A	N/A	N/A	N/A	N	N/A	N/A	N/A
N/A	N/A	PPAS0D03850	N/A	N/A	1358	N/A	N/A	N/A	N/A	N/A	N	N	N/A	N/A	N	N/A	N/A	N/A	N/A	N/A	N/A	N/A	-0.618138	yes	-0.754055	yes	N/A	N/A	N/A	N/A	N/A	N	N/A	N/A	N/A
N/A	N/A	PPAS0D03860	N/A	N/A	1359	N/A	N/A	N/A	N/A	N/A	N	N	N/A	N/A	N	N/A	N/A	N/A	N/A	N/A	N/A	N/A	0.523827	no	-1.37699	yes	N/A	N/A	N/A	N/A	N/A	N	N/A	N/A	N/A
N/A	N/A	PPAS0D03870	N/A	N/A	1360	N/A	N/A	N/A	N/A	N/A	Y	N	N/A	N/A	N	N/A	N/A	N/A	N/A	N/A	N/A	N/A	N/A	N/A	N/A	N/A	N/A	N/A	N/A	N/A	N/A	Y	N/A	N/A	N/A
N/A	N/A	PPAS0D03880	N/A	N/A	1361	N/A	N/A	N/A	N/A	N/A	N	N	N/A	N/A	N	N/A	N/A	N/A	N/A	N/A	N/A	N/A	N/A	N/A	N/A	N/A	N/A	N/A	N/A	N/A	N/A	Y	N/A	N/A	N/A
N/A	N/A	PPAS0D03890	N/A	N/A	1362	N/A	N/A	N/A	N/A	N/A	N	N	N/A	N/A	N	N/A	N/A	N/A	N/A	N/A	N/A	N/A	0.755355	no	0.145877	no	N/A	N/A	N/A	N/A	N/A	Y	N/A	N/A	N/A
N/A	N/A	PPAS0D03900	N/A	N/A	1363	N/A	N/A	N/A	N/A	N/A	N	N	N/A	N/A	N	N/A	N/A	N/A	N/A	N/A	N/A	N/A	N/A	N/A	N/A	N/A	N/A	N/A	N/A	N/A	N/A	N	N/A	N/A	N/A
N/A	N/A	PPAS0D04020	N/A	N/A	1364	N/A	N/A	N/A	N/A	N/A	Y	N	N/A	N/A	N	N/A	N/A	N/A	N/A	N/A	N/A	N/A	-1.31964	no	-1.01596	no	N/A	N/A	N/A	N/A	N/A	Y	N/A	N/A	N/A
N/A	N/A	PPAS0D04070	N/A	N/A	1365	N/A	N/A	N/A	N/A	N/A	N	N	N/A	N/A	N	N/A	N/A	N/A	N/A	N/A	N/A	N/A	N/A	N/A	N/A	N/A	N/A	N/A	N/A	N/A	N/A	N	N/A	N/A	N/A
N/A	N/A	PPAS0D04080	N/A	N/A	1366	N/A	N/A	N/A	N/A	N/A	Y	N	N/A	N/A	N	N/A	N/A	N/A	N/A	N/A	N/A	N/A	N/A	N/A	N/A	N/A	N/A	N/A	N/A	N/A	N/A	N	N/A	N/A	N/A
N/A	N/A	PPAS0D04110	N/A	N/A	1367	N/A	N/A	N/A	N/A	N/A	Y	N	N/A	N/A	N	N/A	N/A	N/A	N/A	N/A	N/A	N/A	2.56274	no	0.0796602	no	N/A	N/A	N/A	N/A	N/A	N	N/A	N/A	N/A
N/A	N/A	PPAS0D04220	N/A	N/A	1368	N/A	N/A	N/A	N/A	N/A	N	N	N/A	N/A	N	N/A	N/A	N/A	N/A	N/A	N/A	N/A	2.82961	yes	0.107954	no	N/A	N/A	N/A	N/A	N/A	N	N/A	N/A	N/A
N/A	N/A	PPAS0D04250	N/A	N/A	1369	N/A	N/A	N/A	N/A	N/A	N	N	N/A	N/A	N	N/A	N/A	N/A	N/A	N/A	N/A	N/A	0.125472	no	0.296024	no	N/A	N/A	N/A	N/A	N/A	N	N/A	N/A	N/A
N/A	N/A	PPAS0D04270	N/A	N/A	1370	N/A	N/A	N/A	N/A	N/A	N	N	N/A	N/A	N	N/A	N/A	N/A	N/A	N/A	N/A	N/A	0.410003	no	0.27506	no	N/A	N/A	N/A	N/A	N/A	N	N/A	N/A	N/A
N/A	N/A	PPAS0D04280	N/A	N/A	1371	N/A	N/A	N/A	N/A	N/A	N	N	N/A	N/A	N	N/A	N/A	N/A	N/A	N/A	N/A	N/A	3.29148	no	0.0377228	no	N/A	N/A	N/A	N/A	N/A	N	N/A	N/A	N/A
N/A	N/A	PPAS0D04320	N/A	N/A	1372	N/A	N/A	N/A	N/A	N/A	N	N	N/A	N/A	N	N/A	N/A	N/A	N/A	N/A	N/A	N/A	-0.0934539	no	0.235401	no	N/A	N/A	N/A	N/A	N/A	N	N/A	N/A	N/A
N/A	N/A	PPAS0D04350	N/A	N/A	1373	N/A	N/A	N/A	N/A	N/A	Y	N	N/A	N/A	N	N/A	N/A	N/A	N/A	N/A	N/A	N/A	3.24707	no	-0.250372	no	N/A	N/A	N/A	N/A	N/A	Y	N/A	N/A	N/A
N/A	N/A	PPAS0D04500	N/A	N/A	1374	N/A	N/A	N/A	N/A	N/A	Y	N	N/A	N/A	N	N/A	N/A	N/A	N/A	N/A	N/A	N/A	-2.5714	yes	-0.382692	no	N/A	N/A	N/A	N/A	N/A	Y	N/A	N/A	N/A
N/A	N/A	PPAS0D04510	N/A	N/A	1375	N/A	N/A	N/A	N/A	N/A	Y	N	N/A	N/A	N	N/A	N/A	N/A	N/A	N/A	N/A	N/A	N/A	N/A	N/A	N/A	N/A	N/A	N/A	N/A	N/A	Y	N/A	N/A	N/A
N/A	N/A	PPAS0D04520	N/A	N/A	1376	N/A	N/A	N/A	N/A	N/A	N	N	N/A	N/A	N	N/A	N/A	N/A	N/A	N/A	N/A	N/A	2.36097	yes	0.162159	no	N/A	N/A	N/A	N/A	N/A	N	N/A	N/A	N/A
N/A	N/A	PPAS0D04570	N/A	N/A	1377	N/A	N/A	N/A	N/A	N/A	Y	N	N/A	N/A	N	N/A	N/A	N/A	N/A	N/A	N/A	N/A	-0.465231	no	0.0253759	no	N/A	N/A	N/A	N/A	N/A	Y	N/A	N/A	N/A
N/A	N/A	PPAS0D04620	N/A	N/A	1378	N/A	N/A	N/A	N/A	N/A	Y	N	N/A	N/A	N	N/A	N/A	N/A	N/A	N/A	N/A	N/A	-0.346764	no	0.300755	no	N/A	N/A	N/A	N/A	N/A	Y	N/A	N/A	N/A
N/A	N/A	PPAS0D04670	N/A	N/A	1379	N/A	N/A	N/A	N/A	N/A	Y	N	N/A	N/A	N	N/A	N/A	N/A	N/A	N/A	N/A	N/A	0.201987	no	-0.0557055	no	N/A	N/A	N/A	N/A	N/A	N	N/A	N/A	N/A
N/A	N/A	PPAS0D04680	N/A	N/A	1380	N/A	N/A	N/A	N/A	N/A	Y	N	N/A	N/A	N	N/A	N/A	N/A	N/A	N/A	N/A	N/A	0.201987	no	-0.0557055	no	N/A	N/A	N/A	N/A	N/A	Y	N/A	N/A	N/A
N/A	N/A	PPAS0D04690	N/A	N/A	1381	N/A	N/A	N/A	N/A	N/A	Y	N	N/A	N/A	N	N/A	N/A	N/A	N/A	N/A	N/A	N/A	2.16018	yes	0.0867689	no	N/A	N/A	N/A	N/A	N/A	Y	N/A	N/A	N/A
N/A	N/A	PPAS0D04710	N/A	N/A	1382	N/A	N/A	N/A	N/A	N/A	N	N	N/A	N/A	N	N/A	N/A	N/A	N/A	N/A	N/A	N/A	N/A	N/A	N/A	N/A	N/A	N/A	N/A	N/A	N/A	N	N/A	N/A	N/A
N/A	N/A	PPAS0D04770	N/A	N/A	1383	N/A	N/A	N/A	N/A	N/A	N	N	N/A	N/A	N	N/A	N/A	N/A	N/A	N/A	N/A	N/A	1.20234	yes	0.0321067	no	N/A	N/A	N/A	N/A	N/A	N	N/A	N/A	N/A
N/A	N/A	PPAS0D04780	N/A	N/A	1384	N/A	N/A	N/A	N/A	N/A	N	N	N/A	N/A	N	N/A	N/A	N/A	N/A	N/A	N/A	N/A	N/A	N/A	N/A	N/A	N/A	N/A	N/A	N/A	N/A	N	N/A	N/A	N/A
N/A	N/A	PPAS0D04850	N/A	N/A	1385	N/A	N/A	N/A	N/A	N/A	N	N	N/A	N/A	N	N/A	N/A	N/A	N/A	N/A	N/A	N/A	2.64669	yes	0.280048	no	N/A	N/A	N/A	N/A	N/A	N	N/A	N/A	N/A
N/A	N/A	PPAS0D04930	N/A	N/A	1386	N/A	N/A	N/A	N/A	N/A	N	N	N/A	N/A	N	N/A	N/A	N/A	N/A	N/A	N/A	N/A	-0.591457	yes	0.370972	no	N/A	N/A	N/A	N/A	N/A	Y	N/A	N/A	N/A
N/A	N/A	PPAS0D04940	N/A	N/A	1387	N/A	N/A	N/A	N/A	N/A	N	N	N/A	N/A	N	N/A	N/A	N/A	N/A	N/A	N/A	N/A	0.60609	no	-0.0503125	no	N/A	N/A	N/A	N/A	N/A	N	N/A	N/A	N/A
N/A	N/A	PPAS0D04970	N/A	N/A	1388	N/A	N/A	N/A	N/A	N/A	Y	N	N/A	N/A	N	N/A	N/A	N/A	N/A	N/A	N/A	N/A	-0.38941	no	0.482137	no	N/A	N/A	N/A	N/A	N/A	Y	N/A	N/A	N/A
N/A	N/A	PPAS0D04980	N/A	N/A	1389	N/A	N/A	N/A	N/A	N/A	Y	N	N/A	N/A	N	N/A	N/A	N/A	N/A	N/A	N/A	N/A	2.39094	yes	0.0260086	no	N/A	N/A	N/A	N/A	N/A	Y	N/A	N/A	N/A
N/A	N/A	PPAS0D04990	N/A	N/A	1390	N/A	N/A	N/A	N/A	N/A	Y	N	N/A	N/A	N	N/A	N/A	N/A	N/A	N/A	N/A	N/A	N/A	N/A	N/A	N/A	N/A	N/A	N/A	N/A	N/A	Y	N/A	N/A	N/A
N/A	N/A	PPAS0D05010	N/A	N/A	1391	N/A	N/A	N/A	N/A	N/A	N	N	N/A	N/A	N	N/A	N/A	N/A	N/A	N/A	N/A	N/A	3.1439	yes	-1.45506	no	N/A	N/A	N/A	N/A	N/A	Y	N/A	N/A	N/A
N/A	N/A	PPAS0D05020	N/A	N/A	1392	N/A	N/A	N/A	N/A	N/A	N	N	N/A	N/A	N	N/A	N/A	N/A	N/A	N/A	N/A	N/A	0.622762	no	-0.00351358	no	N/A	N/A	N/A	N/A	N/A	N	N/A	N/A	N/A
N/A	N/A	PPAS0D05030	N/A	N/A	1393	N/A	N/A	N/A	N/A	N/A	N	N	N/A	N/A	N	N/A	N/A	N/A	N/A	N/A	N/A	N/A	N/A	N/A	N/A	N/A	N/A	N/A	N/A	N/A	N/A	N	N/A	N/A	N/A
N/A	N/A	PPAS0D05060	N/A	N/A	1394	N/A	N/A	N/A	N/A	N/A	Y	N	N/A	N/A	N	N/A	N/A	N/A	N/A	N/A	N/A	N/A	N/A	N/A	N/A	N/A	N/A	N/A	N/A	N/A	N/A	Y	N/A	N/A	N/A
N/A	N/A	PPAS0D05090	N/A	N/A	1395	N/A	N/A	N/A	N/A	N/A	N	N	N/A	N/A	N	N/A	N/A	N/A	N/A	N/A	N/A	N/A	N/A	N/A	N/A	N/A	N/A	N/A	N/A	N/A	N/A	N	N/A	N/A	N/A
N/A	N/A	PPAS0D05150	N/A	N/A	1396	N/A	N/A	N/A	N/A	N/A	Y	N	N/A	N/A	N	N/A	N/A	N/A	N/A	N/A	N/A	N/A	N/A	N/A	N/A	N/A	N/A	N/A	N/A	N/A	N/A	Y	N/A	N/A	N/A
N/A	N/A	PPAS0D05160	N/A	N/A	1397	N/A	N/A	N/A	N/A	N/A	N	N	N/A	N/A	N	N/A	N/A	N/A	N/A	N/A	N/A	N/A	-1.79227	yes	-0.0663401	no	N/A	N/A	N/A	N/A	N/A	Y	N/A	N/A	N/A
N/A	N/A	PPAS0D05210	N/A	N/A	1398	N/A	N/A	N/A	N/A	N/A	N	N	N/A	N/A	N	N/A	N/A	N/A	N/A	N/A	N/A	N/A	0.322325	no	0.112161	no	N/A	N/A	N/A	N/A	N/A	N	N/A	N/A	N/A
N/A	N/A	PPAS0D05250	N/A	N/A	1399	N/A	N/A	N/A	N/A	N/A	N	N	N/A	N/A	N	N/A	N/A	N/A	N/A	N/A	N/A	N/A	-1.08123	yes	0.374627	no	N/A	N/A	N/A	N/A	N/A	Y	N/A	N/A	N/A
N/A	N/A	PPAS0D05260	N/A	N/A	1400	N/A	N/A	N/A	N/A	N/A	Y	N	N/A	N/A	N	N/A	N/A	N/A	N/A	N/A	N/A	N/A	N/A	N/A	N/A	N/A	N/A	N/A	N/A	N/A	N/A	Y	N/A	N/A	N/A
N/A	N/A	PPAS0D05270	N/A	N/A	1401	N/A	N/A	N/A	N/A	N/A	Y	N	N/A	N/A	N	N/A	N/A	N/A	N/A	N/A	N/A	N/A	1.78357	yes	0.0995021	no	N/A	N/A	N/A	N/A	N/A	Y	N/A	N/A	N/A
N/A	N/A	PPAS0D05290	N/A	N/A	1402	N/A	N/A	N/A	N/A	N/A	N	N	N/A	N/A	N	N/A	N/A	N/A	N/A	N/A	N/A	N/A	0.106224	no	0.414213	no	N/A	N/A	N/A	N/A	N/A	N	N/A	N/A	N/A
N/A	N/A	PPAS0D05340	N/A	N/A	1403	N/A	N/A	N/A	N/A	N/A	Y	N	N/A	N/A	N	N/A	N/A	N/A	N/A	N/A	N/A	N/A	0.444732	no	-0.724642	no	N/A	N/A	N/A	N/A	N/A	N	N/A	N/A	N/A
N/A	N/A	PPAS0D05420	N/A	N/A	1404	N/A	N/A	N/A	N/A	N/A	N	N	N/A	N/A	N	N/A	N/A	N/A	N/A	N/A	N/A	N/A	1.41058	yes	-0.116762	no	N/A	N/A	N/A	N/A	N/A	N	N/A	N/A	N/A
N/A	N/A	PPAS0D05430	N/A	N/A	1405	N/A	N/A	N/A	N/A	N/A	N	N	N/A	N/A	N	N/A	N/A	N/A	N/A	N/A	N/A	N/A	N/A	N/A	N/A	N/A	N/A	N/A	N/A	N/A	N/A	N	N/A	N/A	N/A
N/A	N/A	PPAS0D05440	N/A	N/A	1406	N/A	N/A	N/A	N/A	N/A	N	N	N/A	N/A	N	N/A	N/A	N/A	N/A	N/A	N/A	N/A	5.38406	yes	-1.7321	yes	N/A	N/A	N/A	N/A	N/A	N	N/A	N/A	N/A
N/A	N/A	PPAS0D05460	N/A	N/A	1407	N/A	N/A	N/A	N/A	N/A	N	N	N/A	N/A	N	N/A	N/A	N/A	N/A	N/A	N/A	N/A	N/A	N/A	N/A	N/A	N/A	N/A	N/A	N/A	N/A	N	N/A	N/A	N/A
N/A	N/A	PPAS0D05500	N/A	N/A	1408	N/A	N/A	N/A	N/A	N/A	N	N	N/A	N/A	N	N/A	N/A	N/A	N/A	N/A	N/A	N/A	0.705102	yes	0.0463959	no	N/A	N/A	N/A	N/A	N/A	N	N/A	N/A	N/A
N/A	N/A	PPAS0D05520	N/A	N/A	1409	N/A	N/A	N/A	N/A	N/A	N	N	N/A	N/A	N	N/A	N/A	N/A	N/A	N/A	N/A	N/A	N/A	N/A	N/A	N/A	N/A	N/A	N/A	N/A	N/A	N	N/A	N/A	N/A
N/A	N/A	PPAS0D05590	N/A	N/A	1410	N/A	N/A	N/A	N/A	N/A	N	N	N/A	N/A	N	N/A	N/A	N/A	N/A	N/A	N/A	N/A	-0.621389	yes	0.0592861	no	N/A	N/A	N/A	N/A	N/A	N	N/A	N/A	N/A
N/A	N/A	PPAS0D05680	N/A	N/A	1411	N/A	N/A	N/A	N/A	N/A	N	N	N/A	N/A	N	N/A	N/A	N/A	N/A	N/A	N/A	N/A	2.3168	yes	-0.24144	no	N/A	N/A	N/A	N/A	N/A	Y	N/A	N/A	N/A
N/A	N/A	PPAS0D05770	N/A	N/A	1412	N/A	N/A	N/A	N/A	N/A	N	N	N/A	N/A	N	N/A	N/A	N/A	N/A	N/A	N/A	N/A	N/A	N/A	N/A	N/A	N/A	N/A	N/A	N/A	N/A	N	N/A	N/A	N/A
N/A	N/A	PPAS0D05850	N/A	N/A	1413	N/A	N/A	N/A	N/A	N/A	Y	N	N/A	N/A	N	N/A	N/A	N/A	N/A	N/A	N/A	N/A	-1.28473	no	-0.478078	no	N/A	N/A	N/A	N/A	N/A	Y	N/A	N/A	N/A
N/A	N/A	PPAS0D05860	N/A	N/A	1414	N/A	N/A	N/A	N/A	N/A	N	N	N/A	N/A	N	N/A	N/A	N/A	N/A	N/A	N/A	N/A	0.68919	no	0.279155	no	N/A	N/A	N/A	N/A	N/A	Y	N/A	N/A	N/A
N/A	N/A	PPAS0D05880	N/A	N/A	1415	N/A	N/A	N/A	N/A	N/A	N	N	N/A	N/A	N	N/A	N/A	N/A	N/A	N/A	N/A	N/A	-1.57037	yes	0.410449	no	N/A	N/A	N/A	N/A	N/A	N	N/A	N/A	N/A
N/A	N/A	PPAS0D05910	N/A	N/A	1416	N/A	N/A	N/A	N/A	N/A	N	N	N/A	N/A	N	N/A	N/A	N/A	N/A	N/A	N/A	N/A	-0.131928	no	-0.219247	no	N/A	N/A	N/A	N/A	N/A	N	N/A	N/A	N/A
N/A	N/A	PPAS0D05970	N/A	N/A	1417	N/A	N/A	N/A	N/A	N/A	N	N	N/A	N/A	N	N/A	N/A	N/A	N/A	N/A	N/A	N/A	-2.18696	no	-0.0987746	no	N/A	N/A	N/A	N/A	N/A	N	N/A	N/A	N/A
N/A	N/A	PPAS0D05990	N/A	N/A	1418	N/A	N/A	N/A	N/A	N/A	N	N	N/A	N/A	N	N/A	N/A	N/A	N/A	N/A	N/A	N/A	-1.64309	no	0.46689	no	N/A	N/A	N/A	N/A	N/A	N	N/A	N/A	N/A
N/A	N/A	PPAS0D06020	N/A	N/A	1419	N/A	N/A	N/A	N/A	N/A	N	N	N/A	N/A	N	N/A	N/A	N/A	N/A	N/A	N/A	N/A	0.492638	no	0.262719	no	N/A	N/A	N/A	N/A	N/A	N	N/A	N/A	N/A
N/A	N/A	PPAS0D06060	N/A	N/A	1420	N/A	N/A	N/A	N/A	N/A	N	N	N/A	N/A	N	N/A	N/A	N/A	N/A	N/A	N/A	N/A	N/A	N/A	N/A	N/A	N/A	N/A	N/A	N/A	N/A	Y	N/A	N/A	N/A
N/A	N/A	PPAS0D06080	N/A	N/A	1421	N/A	N/A	N/A	N/A	N/A	Y	N	N/A	N/A	N	N/A	N/A	N/A	N/A	N/A	N/A	N/A	0	no	0	no	N/A	N/A	N/A	N/A	N/A	Y	N/A	N/A	N/A
N/A	N/A	PPAS0D06090	N/A	N/A	1422	N/A	N/A	N/A	N/A	N/A	Y	N	N/A	N/A	N	N/A	N/A	N/A	N/A	N/A	N/A	N/A	0.697272	no	-0.243101	no	N/A	N/A	N/A	N/A	N/A	Y	N/A	N/A	N/A
N/A	N/A	PPAS0D06100	N/A	N/A	1423	N/A	N/A	N/A	N/A	N/A	N	N	N/A	N/A	N	N/A	N/A	N/A	N/A	N/A	N/A	N/A	-1.73897	yes	0.269932	no	N/A	N/A	N/A	N/A	N/A	N	N/A	N/A	N/A
N/A	N/A	PPAS0D06120	N/A	N/A	1424	N/A	N/A	N/A	N/A	N/A	N	N	N/A	N/A	N	N/A	N/A	N/A	N/A	N/A	N/A	N/A	-1.00665	yes	0.505586	no	N/A	N/A	N/A	N/A	N/A	N	N/A	N/A	N/A
N/A	N/A	PPAS0D06150	N/A	N/A	1425	N/A	N/A	N/A	N/A	N/A	N	N	N/A	N/A	N	N/A	N/A	N/A	N/A	N/A	N/A	N/A	0.0438863	no	0.416252	no	N/A	N/A	N/A	N/A	N/A	N	N/A	N/A	N/A
N/A	N/A	PPAS0D06270	N/A	N/A	1426	N/A	N/A	N/A	N/A	N/A	N	N	N/A	N/A	N	N/A	N/A	N/A	N/A	N/A	N/A	N/A	N/A	N/A	N/A	N/A	N/A	N/A	N/A	N/A	N/A	N	N/A	N/A	N/A
N/A	N/A	PPAS0D06280	N/A	N/A	1427	N/A	N/A	N/A	N/A	N/A	N	N	N/A	N/A	N	N/A	N/A	N/A	N/A	N/A	N/A	N/A	-0.197527	no	-0.0212686	no	N/A	N/A	N/A	N/A	N/A	Y	N/A	N/A	N/A
N/A	N/A	PPAS0D06290	N/A	N/A	1428	N/A	N/A	N/A	N/A	N/A	N	N	N/A	N/A	N	N/A	N/A	N/A	N/A	N/A	N/A	N/A	2.58017	yes	0.162123	no	N/A	N/A	N/A	N/A	N/A	Y	N/A	N/A	N/A
N/A	N/A	PPAS0D06300	N/A	N/A	1429	N/A	N/A	N/A	N/A	N/A	N	N	N/A	N/A	N	N/A	N/A	N/A	N/A	N/A	N/A	N/A	-0.463781	no	0.276894	no	N/A	N/A	N/A	N/A	N/A	N	N/A	N/A	N/A
N/A	N/A	PPAS0D06310	N/A	N/A	1430	N/A	N/A	N/A	N/A	N/A	N	N	N/A	N/A	N	N/A	N/A	N/A	N/A	N/A	N/A	N/A	-1.81089	yes	-0.750786	yes	N/A	N/A	N/A	N/A	N/A	N	N/A	N/A	N/A
N/A	N/A	PPAS0D06320	N/A	N/A	1431	N/A	N/A	N/A	N/A	N/A	Y	N	N/A	N/A	N	N/A	N/A	N/A	N/A	N/A	N/A	N/A	-5.44669	yes	0.793981	yes	N/A	N/A	N/A	N/A	N/A	Y	N/A	N/A	N/A
N/A	N/A	PPAS0D06330	N/A	N/A	1432	N/A	N/A	N/A	N/A	N/A	N	N	N/A	N/A	N	N/A	N/A	N/A	N/A	N/A	N/A	N/A	1.26163	yes	0.138872	no	N/A	N/A	N/A	N/A	N/A	Y	N/A	N/A	N/A
N/A	N/A	PPAS0D06340	N/A	N/A	1433	N/A	N/A	N/A	N/A	N/A	N	N	N/A	N/A	N	N/A	N/A	N/A	N/A	N/A	N/A	N/A	N/A	N/A	N/A	N/A	N/A	N/A	N/A	N/A	N/A	Y	N/A	N/A	N/A
N/A	N/A	PPAS0D06350	N/A	N/A	1434	N/A	N/A	N/A	N/A	N/A	N	N	N/A	N/A	N	N/A	N/A	N/A	N/A	N/A	N/A	N/A	-0.90161	yes	0.357114	no	N/A	N/A	N/A	N/A	N/A	N	N/A	N/A	N/A
N/A	N/A	PPAS0D06360	N/A	N/A	1435	N/A	N/A	N/A	N/A	N/A	Y	N	N/A	N/A	N	N/A	N/A	N/A	N/A	N/A	N/A	N/A	0.310843	no	0.0136254	no	N/A	N/A	N/A	N/A	N/A	Y	N/A	N/A	N/A
N/A	N/A	PPAS0D06370	N/A	N/A	1436	N/A	N/A	N/A	N/A	N/A	Y	N	N/A	N/A	N	N/A	N/A	N/A	N/A	N/A	N/A	N/A	-0.313064	no	0.452621	no	N/A	N/A	N/A	N/A	N/A	Y	N/A	N/A	N/A
N/A	N/A	PPAS0D06400	N/A	N/A	1437	N/A	N/A	N/A	N/A	N/A	N	N	N/A	N/A	N	N/A	N/A	N/A	N/A	N/A	N/A	N/A	-0.376302	no	0.138148	no	N/A	N/A	N/A	N/A	N/A	Y	N/A	N/A	N/A
N/A	N/A	PPAS0D06420	N/A	N/A	1438	N/A	N/A	N/A	N/A	N/A	N	N	N/A	N/A	N	N/A	N/A	N/A	N/A	N/A	N/A	N/A	N/A	N/A	N/A	N/A	N/A	N/A	N/A	N/A	N/A	N	N/A	N/A	N/A
N/A	N/A	PPAS0D06460	N/A	N/A	1439	N/A	N/A	N/A	N/A	N/A	N	N	N/A	N/A	N	N/A	N/A	N/A	N/A	N/A	N/A	N/A	-0.532883	no	0.204748	no	N/A	N/A	N/A	N/A	N/A	Y	N/A	N/A	N/A
N/A	N/A	PPAS0D06490	N/A	N/A	1440	N/A	N/A	N/A	N/A	N/A	N	N	N/A	N/A	N	N/A	N/A	N/A	N/A	N/A	N/A	N/A	0.199478	no	-0.0334827	no	N/A	N/A	N/A	N/A	N/A	N	N/A	N/A	N/A
N/A	N/A	PPAS0D06530	N/A	N/A	1441	N/A	N/A	N/A	N/A	N/A	N	N	N/A	N/A	N	N/A	N/A	N/A	N/A	N/A	N/A	N/A	1.705	yes	0.32765	no	N/A	N/A	N/A	N/A	N/A	N	N/A	N/A	N/A
N/A	N/A	PPAS0D06540	N/A	N/A	1442	N/A	N/A	N/A	N/A	N/A	Y	N	N/A	N/A	N	N/A	N/A	N/A	N/A	N/A	N/A	N/A	0.710136	no	0.278652	no	N/A	N/A	N/A	N/A	N/A	Y	N/A	N/A	N/A
N/A	N/A	PPAS0D06550	N/A	N/A	1443	N/A	N/A	N/A	N/A	N/A	Y	N	N/A	N/A	N	N/A	N/A	N/A	N/A	N/A	N/A	N/A	-0.404506	no	0.325033	no	N/A	N/A	N/A	N/A	N/A	Y	N/A	N/A	N/A
N/A	N/A	PPAS0D06600	N/A	N/A	1444	N/A	N/A	N/A	N/A	N/A	Y	N	N/A	N/A	N	N/A	N/A	N/A	N/A	N/A	N/A	N/A	-3.13187	yes	0.156374	no	N/A	N/A	N/A	N/A	N/A	N	N/A	N/A	N/A
N/A	N/A	PPAS0D06620	N/A	N/A	1445	N/A	N/A	N/A	N/A	N/A	Y	N	N/A	N/A	N	N/A	N/A	N/A	N/A	N/A	N/A	N/A	N/A	N/A	N/A	N/A	N/A	N/A	N/A	N/A	N/A	Y	N/A	N/A	N/A
N/A	N/A	PPAS0D06630	N/A	N/A	1446	N/A	N/A	N/A	N/A	N/A	N	N	N/A	N/A	N	N/A	N/A	N/A	N/A	N/A	N/A	N/A	0.824633	no	-1.0318	yes	N/A	N/A	N/A	N/A	N/A	N	N/A	N/A	N/A
N/A	N/A	PPAS0D06640	N/A	N/A	1447	N/A	N/A	N/A	N/A	N/A	N	N	N/A	N/A	N	N/A	N/A	N/A	N/A	N/A	N/A	N/A	-1.64575	yes	0.0988644	no	N/A	N/A	N/A	N/A	N/A	N	N/A	N/A	N/A
N/A	N/A	PPAS0D06650	N/A	N/A	1448	N/A	N/A	N/A	N/A	N/A	N	N	N/A	N/A	N	N/A	N/A	N/A	N/A	N/A	N/A	N/A	-1.64575	yes	0.0988644	no	N/A	N/A	N/A	N/A	N/A	Y	N/A	N/A	N/A
N/A	N/A	PPAS0D06700	N/A	N/A	1449	N/A	N/A	N/A	N/A	N/A	N	N	N/A	N/A	N	N/A	N/A	N/A	N/A	N/A	N/A	N/A	-0.123306	no	0.227423	no	N/A	N/A	N/A	N/A	N/A	N	N/A	N/A	N/A
N/A	N/A	PPAS0D06710	N/A	N/A	1450	N/A	N/A	N/A	N/A	N/A	N	N	N/A	N/A	N	N/A	N/A	N/A	N/A	N/A	N/A	N/A	1.80226	yes	0.0819194	no	N/A	N/A	N/A	N/A	N/A	N	N/A	N/A	N/A
N/A	N/A	PPAS0D06750	N/A	N/A	1451	N/A	N/A	N/A	N/A	N/A	N	N	N/A	N/A	N	N/A	N/A	N/A	N/A	N/A	N/A	N/A	0.622632	no	-0.890448	no	N/A	N/A	N/A	N/A	N/A	Y	N/A	N/A	N/A
N/A	N/A	PPAS0D06820	N/A	N/A	1452	N/A	N/A	N/A	N/A	N/A	N	N	N/A	N/A	N	N/A	N/A	N/A	N/A	N/A	N/A	N/A	N/A	N/A	N/A	N/A	N/A	N/A	N/A	N/A	N/A	N	N/A	N/A	N/A
N/A	N/A	PPAS0D06870	N/A	N/A	1453	N/A	N/A	N/A	N/A	N/A	N	N	N/A	N/A	N	N/A	N/A	N/A	N/A	N/A	N/A	N/A	-0.800653	no	0.395939	no	N/A	N/A	N/A	N/A	N/A	N	N/A	N/A	N/A
N/A	N/A	PPAS0D06910	N/A	N/A	1454	N/A	N/A	N/A	N/A	N/A	N	N	N/A	N/A	N	N/A	N/A	N/A	N/A	N/A	N/A	N/A	3.32237	yes	0.217029	no	N/A	N/A	N/A	N/A	N/A	N	N/A	N/A	N/A
N/A	N/A	PPAS0D06940	N/A	N/A	1455	N/A	N/A	N/A	N/A	N/A	N	N	N/A	N/A	N	N/A	N/A	N/A	N/A	N/A	N/A	N/A	0.12044	no	0.198373	no	N/A	N/A	N/A	N/A	N/A	N	N/A	N/A	N/A
N/A	N/A	PPAS0D06980	N/A	N/A	1456	N/A	N/A	N/A	N/A	N/A	N	N	N/A	N/A	N	N/A	N/A	N/A	N/A	N/A	N/A	N/A	N/A	N/A	N/A	N/A	N/A	N/A	N/A	N/A	N/A	N	N/A	N/A	N/A
N/A	N/A	PPAS0D07000	N/A	N/A	1457	N/A	N/A	N/A	N/A	N/A	N	N	N/A	N/A	N	N/A	N/A	N/A	N/A	N/A	N/A	N/A	N/A	N/A	N/A	N/A	N/A	N/A	N/A	N/A	N/A	N	N/A	N/A	N/A
N/A	N/A	PPAS0D07010	N/A	N/A	1458	N/A	N/A	N/A	N/A	N/A	N	N	N/A	N/A	N	N/A	N/A	N/A	N/A	N/A	N/A	N/A	N/A	N/A	N/A	N/A	N/A	N/A	N/A	N/A	N/A	N	N/A	N/A	N/A
N/A	N/A	PPAS0D07020	N/A	N/A	1459	N/A	N/A	N/A	N/A	N/A	Y	N	N/A	N/A	N	N/A	N/A	N/A	N/A	N/A	N/A	N/A	0.375005	no	0.236538	no	N/A	N/A	N/A	N/A	N/A	N	N/A	N/A	N/A
N/A	N/A	PPAS0D07050	N/A	N/A	1460	N/A	N/A	N/A	N/A	N/A	Y	N	N/A	N/A	N	N/A	N/A	N/A	N/A	N/A	N/A	N/A	3.98077	yes	0.364572	no	N/A	N/A	N/A	N/A	N/A	Y	N/A	N/A	N/A
N/A	N/A	PPAS0D07100	N/A	N/A	1461	N/A	N/A	N/A	N/A	N/A	N	N	N/A	N/A	N	N/A	N/A	N/A	N/A	N/A	N/A	N/A	-0.0195664	no	0.187236	no	N/A	N/A	N/A	N/A	N/A	N	N/A	N/A	N/A
N/A	N/A	PPAS0D07150	N/A	N/A	1462	N/A	N/A	N/A	N/A	N/A	N	N	N/A	N/A	N	N/A	N/A	N/A	N/A	N/A	N/A	N/A	2.15411	yes	0.23396	no	N/A	N/A	N/A	N/A	N/A	N	N/A	N/A	N/A
N/A	N/A	PPAS0D07160	N/A	N/A	1463	N/A	N/A	N/A	N/A	N/A	N	N	N/A	N/A	N	N/A	N/A	N/A	N/A	N/A	N/A	N/A	0.62082	yes	0.0495335	no	N/A	N/A	N/A	N/A	N/A	N	N/A	N/A	N/A
N/A	N/A	PPAS0D07230	N/A	N/A	1464	N/A	N/A	N/A	N/A	N/A	N	N	N/A	N/A	N	N/A	N/A	N/A	N/A	N/A	N/A	N/A	6.36725	yes	-0.373742	no	N/A	N/A	N/A	N/A	N/A	N	N/A	N/A	N/A
N/A	N/A	PPAS0D07320	N/A	N/A	1465	N/A	N/A	N/A	N/A	N/A	Y	N	N/A	N/A	N	N/A	N/A	N/A	N/A	N/A	N/A	N/A	-2.01431	yes	0.349009	no	N/A	N/A	N/A	N/A	N/A	Y	N/A	N/A	N/A
N/A	N/A	PPAS0D07370	N/A	N/A	1466	N/A	N/A	N/A	N/A	N/A	Y	N	N/A	N/A	N	N/A	N/A	N/A	N/A	N/A	N/A	N/A	N/A	N/A	N/A	N/A	N/A	N/A	N/A	N/A	N/A	Y	N/A	N/A	N/A
N/A	N/A	PPAS0D07400	N/A	N/A	1467	N/A	N/A	N/A	N/A	N/A	N	N	N/A	N/A	N	N/A	N/A	N/A	N/A	N/A	N/A	N/A	-1.82407	yes	0.112898	no	N/A	N/A	N/A	N/A	N/A	N	N/A	N/A	N/A
N/A	N/A	PPAS0D07410	N/A	N/A	1468	N/A	N/A	N/A	N/A	N/A	N	N	N/A	N/A	N	N/A	N/A	N/A	N/A	N/A	N/A	N/A	-0.343729	no	0.271747	no	N/A	N/A	N/A	N/A	N/A	N	N/A	N/A	N/A
N/A	N/A	PPAS0D07470	N/A	N/A	1469	N/A	N/A	N/A	N/A	N/A	N	N	N/A	N/A	N	N/A	N/A	N/A	N/A	N/A	N/A	N/A	1.55051	yes	-0.107622	no	N/A	N/A	N/A	N/A	N/A	N	N/A	N/A	N/A
N/A	N/A	PPAS0D07490	N/A	N/A	1470	N/A	N/A	N/A	N/A	N/A	N	N	N/A	N/A	N	N/A	N/A	N/A	N/A	N/A	N/A	N/A	-0.373026	no	-0.174376	no	N/A	N/A	N/A	N/A	N/A	N	N/A	N/A	N/A
N/A	N/A	PPAS0D07560	N/A	N/A	1471	N/A	N/A	N/A	N/A	N/A	N	N	N/A	N/A	N	N/A	N/A	N/A	N/A	N/A	N/A	N/A	-0.280739	no	0.0430378	no	N/A	N/A	N/A	N/A	N/A	N	N/A	N/A	N/A
N/A	N/A	PPAS0D07660	N/A	N/A	1472	N/A	N/A	N/A	N/A	N/A	N	N	N/A	N/A	N	N/A	N/A	N/A	N/A	N/A	N/A	N/A	0.0716565	no	0.727777	no	N/A	N/A	N/A	N/A	N/A	N	N/A	N/A	N/A
N/A	N/A	PPAS0D07670	N/A	N/A	1473	N/A	N/A	N/A	N/A	N/A	N	N	N/A	N/A	N	N/A	N/A	N/A	N/A	N/A	N/A	N/A	0.0716565	no	0.727777	no	N/A	N/A	N/A	N/A	N/A	N	N/A	N/A	N/A
N/A	N/A	PPAS0D07680	N/A	N/A	1474	N/A	N/A	N/A	N/A	N/A	N	N	N/A	N/A	N	N/A	N/A	N/A	N/A	N/A	N/A	N/A	-0.69324	no	0.378256	no	N/A	N/A	N/A	N/A	N/A	N	N/A	N/A	N/A
N/A	N/A	PPAS0D07710	N/A	N/A	1475	N/A	N/A	N/A	N/A	N/A	Y	N	N/A	N/A	N	N/A	N/A	N/A	N/A	N/A	N/A	N/A	-0.238169	no	0.0184783	no	N/A	N/A	N/A	N/A	N/A	Y	N/A	N/A	N/A
N/A	N/A	PPAS0D07720	N/A	N/A	1476	N/A	N/A	N/A	N/A	N/A	Y	N	N/A	N/A	N	N/A	N/A	N/A	N/A	N/A	N/A	N/A	0	no	0.126154	no	N/A	N/A	N/A	N/A	N/A	N	N/A	N/A	N/A
N/A	N/A	PPAS0D07740	N/A	N/A	1477	N/A	N/A	N/A	N/A	N/A	N	N	N/A	N/A	N	N/A	N/A	N/A	N/A	N/A	N/A	N/A	0	no	0.126154	no	N/A	N/A	N/A	N/A	N/A	N	N/A	N/A	N/A
N/A	N/A	PPAS0D07750	N/A	N/A	1478	N/A	N/A	N/A	N/A	N/A	N	N	N/A	N/A	N	N/A	N/A	N/A	N/A	N/A	N/A	N/A	0	no	0.126154	no	N/A	N/A	N/A	N/A	N/A	Y	N/A	N/A	N/A
N/A	N/A	PPAS0D07770	N/A	N/A	1479	N/A	N/A	N/A	N/A	N/A	N	N	N/A	N/A	N	N/A	N/A	N/A	N/A	N/A	N/A	N/A	0	no	0.139851	no	N/A	N/A	N/A	N/A	N/A	N	N/A	N/A	N/A
N/A	N/A	PPAS0D07830	N/A	N/A	1480	N/A	N/A	N/A	N/A	N/A	Y	N	N/A	N/A	N	N/A	N/A	N/A	N/A	N/A	N/A	N/A	-3.18215	yes	0.28109	no	N/A	N/A	N/A	N/A	N/A	N	N/A	N/A	N/A
N/A	N/A	PPAS0D07880	N/A	N/A	1481	N/A	N/A	N/A	N/A	N/A	N	N	N/A	N/A	N	N/A	N/A	N/A	N/A	N/A	N/A	N/A	0.917937	no	-0.107515	no	N/A	N/A	N/A	N/A	N/A	Y	N/A	N/A	N/A
N/A	N/A	PPAS0D07890	N/A	N/A	1482	N/A	N/A	N/A	N/A	N/A	N	N	N/A	N/A	N	N/A	N/A	N/A	N/A	N/A	N/A	N/A	0.917937	no	-0.107515	no	N/A	N/A	N/A	N/A	N/A	Y	N/A	N/A	N/A
N/A	N/A	PPAS0D07900	N/A	N/A	1483	N/A	N/A	N/A	N/A	N/A	N	N	N/A	N/A	N	N/A	N/A	N/A	N/A	N/A	N/A	N/A	0.917937	no	-0.107515	no	N/A	N/A	N/A	N/A	N/A	N	N/A	N/A	N/A
N/A	N/A	PPAS0D07910	N/A	N/A	1484	N/A	N/A	N/A	N/A	N/A	Y	N	N/A	N/A	N	N/A	N/A	N/A	N/A	N/A	N/A	N/A	N/A	N/A	N/A	N/A	N/A	N/A	N/A	N/A	N/A	Y	N/A	N/A	N/A
N/A	N/A	PPAS0D07930	N/A	N/A	1485	N/A	N/A	N/A	N/A	N/A	Y	N	N/A	N/A	N	N/A	N/A	N/A	N/A	N/A	N/A	N/A	N/A	N/A	N/A	N/A	N/A	N/A	N/A	N/A	N/A	Y	N/A	N/A	N/A
N/A	N/A	PPAS0D07940	N/A	N/A	1486	N/A	N/A	N/A	N/A	N/A	Y	N	N/A	N/A	N	N/A	N/A	N/A	N/A	N/A	N/A	N/A	3.01876	yes	-0.602685	no	N/A	N/A	N/A	N/A	N/A	Y	N/A	N/A	N/A
N/A	N/A	PPAS0D07970	N/A	N/A	1487	N/A	N/A	N/A	N/A	N/A	N	N	N/A	N/A	N	N/A	N/A	N/A	N/A	N/A	N/A	N/A	N/A	N/A	N/A	N/A	N/A	N/A	N/A	N/A	N/A	N	N/A	N/A	N/A
N/A	N/A	PPAS0D07980	N/A	N/A	1488	N/A	N/A	N/A	N/A	N/A	N	N	N/A	N/A	N	N/A	N/A	N/A	N/A	N/A	N/A	N/A	N/A	N/A	N/A	N/A	N/A	N/A	N/A	N/A	N/A	N	N/A	N/A	N/A
N/A	N/A	PPAS0D08040	N/A	N/A	1489	N/A	N/A	N/A	N/A	N/A	Y	N	N/A	N/A	N	N/A	N/A	N/A	N/A	N/A	N/A	N/A	-1.66322	no	0.0355946	no	N/A	N/A	N/A	N/A	N/A	N	N/A	N/A	N/A
N/A	N/A	PPAS0D08060	N/A	N/A	1490	N/A	N/A	N/A	N/A	N/A	N	N	N/A	N/A	N	N/A	N/A	N/A	N/A	N/A	N/A	N/A	1.15441	no	0.136668	no	N/A	N/A	N/A	N/A	N/A	N	N/A	N/A	N/A
N/A	N/A	PPAS0D08070	N/A	N/A	1491	N/A	N/A	N/A	N/A	N/A	N	N	N/A	N/A	N	N/A	N/A	N/A	N/A	N/A	N/A	N/A	1.16499	no	0.313061	no	N/A	N/A	N/A	N/A	N/A	Y	N/A	N/A	N/A
N/A	N/A	PPAS0D08090	N/A	N/A	1492	N/A	N/A	N/A	N/A	N/A	N	N	N/A	N/A	N	N/A	N/A	N/A	N/A	N/A	N/A	N/A	-0.129686	no	0.112741	no	N/A	N/A	N/A	N/A	N/A	N	N/A	N/A	N/A
N/A	N/A	PPAS0D08120	N/A	N/A	1493	N/A	N/A	N/A	N/A	N/A	N	N	N/A	N/A	N	N/A	N/A	N/A	N/A	N/A	N/A	N/A	0.752401	no	-0.114807	no	N/A	N/A	N/A	N/A	N/A	N	N/A	N/A	N/A
N/A	N/A	PPAS0D08160	N/A	N/A	1494	N/A	N/A	N/A	N/A	N/A	Y	N	N/A	N/A	N	N/A	N/A	N/A	N/A	N/A	N/A	N/A	-0.277639	no	-0.121978	no	N/A	N/A	N/A	N/A	N/A	Y	N/A	N/A	N/A
N/A	N/A	PPAS0D08180	N/A	N/A	1495	N/A	N/A	N/A	N/A	N/A	Y	N	N/A	N/A	N	N/A	N/A	N/A	N/A	N/A	N/A	N/A	1.82456	yes	-0.290215	no	N/A	N/A	N/A	N/A	N/A	Y	N/A	N/A	N/A
N/A	N/A	PPAS0D08190	N/A	N/A	1496	N/A	N/A	N/A	N/A	N/A	Y	N	N/A	N/A	N	N/A	N/A	N/A	N/A	N/A	N/A	N/A	-0.356757	no	-0.0183963	no	N/A	N/A	N/A	N/A	N/A	Y	N/A	N/A	N/A
N/A	N/A	PPAS0D08210	N/A	N/A	1497	N/A	N/A	N/A	N/A	N/A	N	N	N/A	N/A	N	N/A	N/A	N/A	N/A	N/A	N/A	N/A	0.0827899	no	0.206836	no	N/A	N/A	N/A	N/A	N/A	N	N/A	N/A	N/A
N/A	N/A	PPAS0D08270	N/A	N/A	1498	N/A	N/A	N/A	N/A	N/A	N	N	N/A	N/A	N	N/A	N/A	N/A	N/A	N/A	N/A	N/A	-1.30979	yes	0.586997	no	N/A	N/A	N/A	N/A	N/A	N	N/A	N/A	N/A
N/A	N/A	PPAS0D08290	N/A	N/A	1499	N/A	N/A	N/A	N/A	N/A	N	N	N/A	N/A	N	N/A	N/A	N/A	N/A	N/A	N/A	N/A	-3.1748	yes	-0.117141	no	N/A	N/A	N/A	N/A	N/A	N	N/A	N/A	N/A
N/A	N/A	PPAS0D08300	N/A	N/A	1500	N/A	N/A	N/A	N/A	N/A	N	N	N/A	N/A	N	N/A	N/A	N/A	N/A	N/A	N/A	N/A	0.910325	yes	0.355488	no	N/A	N/A	N/A	N/A	N/A	Y	N/A	N/A	N/A
N/A	N/A	PPAS0D08360	N/A	N/A	1501	N/A	N/A	N/A	N/A	N/A	N	N	N/A	N/A	N	N/A	N/A	N/A	N/A	N/A	N/A	N/A	0.762777	no	-0.695048	no	N/A	N/A	N/A	N/A	N/A	N	N/A	N/A	N/A
N/A	N/A	PPAS0D08380	N/A	N/A	1502	N/A	N/A	N/A	N/A	N/A	Y	N	N/A	N/A	N	N/A	N/A	N/A	N/A	N/A	N/A	N/A	0.762777	no	-0.695048	no	N/A	N/A	N/A	N/A	N/A	Y	N/A	N/A	N/A
N/A	N/A	PPAS0D08390	N/A	N/A	1503	N/A	N/A	N/A	N/A	N/A	N	N	N/A	N/A	N	N/A	N/A	N/A	N/A	N/A	N/A	N/A	0.596032	no	-1.20153	no	N/A	N/A	N/A	N/A	N/A	N	N/A	N/A	N/A
N/A	N/A	PPAS0D08400	N/A	N/A	1504	N/A	N/A	N/A	N/A	N/A	N	N	N/A	N/A	N	N/A	N/A	N/A	N/A	N/A	N/A	N/A	-1.01898	yes	0.266177	no	N/A	N/A	N/A	N/A	N/A	N	N/A	N/A	N/A
N/A	N/A	PPAS0D08410	N/A	N/A	1505	N/A	N/A	N/A	N/A	N/A	Y	N	N/A	N/A	N	N/A	N/A	N/A	N/A	N/A	N/A	N/A	-1.51418	yes	-0.0518444	no	N/A	N/A	N/A	N/A	N/A	Y	N/A	N/A	N/A
N/A	N/A	PPAS0D08420	N/A	N/A	1506	N/A	N/A	N/A	N/A	N/A	Y	N	N/A	N/A	N	N/A	N/A	N/A	N/A	N/A	N/A	N/A	0.710048	no	-0.180272	no	N/A	N/A	N/A	N/A	N/A	Y	N/A	N/A	N/A
N/A	N/A	PPAS0D08490	N/A	N/A	1507	N/A	N/A	N/A	N/A	N/A	N	N	N/A	N/A	N	N/A	N/A	N/A	N/A	N/A	N/A	N/A	N/A	N/A	N/A	N/A	N/A	N/A	N/A	N/A	N/A	N	N/A	N/A	N/A
N/A	N/A	PPAS0D08510	N/A	N/A	1508	N/A	N/A	N/A	N/A	N/A	N	N	N/A	N/A	N	N/A	N/A	N/A	N/A	N/A	N/A	N/A	N/A	N/A	N/A	N/A	N/A	N/A	N/A	N/A	N/A	N	N/A	N/A	N/A
N/A	N/A	PPAS0D08620	N/A	N/A	1509	N/A	N/A	N/A	N/A	N/A	N	N	N/A	N/A	N	N/A	N/A	N/A	N/A	N/A	N/A	N/A	N/A	N/A	N/A	N/A	N/A	N/A	N/A	N/A	N/A	N	N/A	N/A	N/A
N/A	N/A	PPAS0D08660	N/A	N/A	1510	N/A	N/A	N/A	N/A	N/A	N	N	N/A	N/A	N	N/A	N/A	N/A	N/A	N/A	N/A	N/A	-0.692965	no	0.437329	no	N/A	N/A	N/A	N/A	N/A	N	N/A	N/A	N/A
N/A	N/A	PPAS0D08690	N/A	N/A	1511	N/A	N/A	N/A	N/A	N/A	Y	N	N/A	N/A	N	N/A	N/A	N/A	N/A	N/A	N/A	N/A	N/A	N/A	N/A	N/A	N/A	N/A	N/A	N/A	N/A	Y	N/A	N/A	N/A
N/A	N/A	PPAS0D08710	N/A	N/A	1512	N/A	N/A	N/A	N/A	N/A	Y	N	N/A	N/A	N	N/A	N/A	N/A	N/A	N/A	N/A	N/A	-0.59203	no	-0.113609	no	N/A	N/A	N/A	N/A	N/A	N	N/A	N/A	N/A
N/A	N/A	PPAS0D08720	N/A	N/A	1513	N/A	N/A	N/A	N/A	N/A	Y	N	N/A	N/A	N	N/A	N/A	N/A	N/A	N/A	N/A	N/A	1.43899	yes	0.0577183	no	N/A	N/A	N/A	N/A	N/A	N	N/A	N/A	N/A
N/A	N/A	PPAS0D08740	N/A	N/A	1514	N/A	N/A	N/A	N/A	N/A	Y	N	N/A	N/A	N	N/A	N/A	N/A	N/A	N/A	N/A	N/A	-0.171592	no	0.442613	no	N/A	N/A	N/A	N/A	N/A	N	N/A	N/A	N/A
N/A	N/A	PPAS0D08850	N/A	N/A	1515	N/A	N/A	N/A	N/A	N/A	N	N	N/A	N/A	N	N/A	N/A	N/A	N/A	N/A	N/A	N/A	2.3372	no	-0.363132	no	N/A	N/A	N/A	N/A	N/A	Y	N/A	N/A	N/A
N/A	N/A	PPAS0D08880	N/A	N/A	1516	N/A	N/A	N/A	N/A	N/A	N	N	N/A	N/A	N	N/A	N/A	N/A	N/A	N/A	N/A	N/A	-2.9937	yes	0.0601412	no	N/A	N/A	N/A	N/A	N/A	N	N/A	N/A	N/A
N/A	N/A	PPAS0D08960	N/A	N/A	1517	N/A	N/A	N/A	N/A	N/A	N	N	N/A	N/A	N	N/A	N/A	N/A	N/A	N/A	N/A	N/A	-0.912376	no	0.368222	no	N/A	N/A	N/A	N/A	N/A	N	N/A	N/A	N/A
N/A	N/A	PPAS0D08970	N/A	N/A	1518	N/A	N/A	N/A	N/A	N/A	N	N	N/A	N/A	N	N/A	N/A	N/A	N/A	N/A	N/A	N/A	0.33339	no	0.29454	no	N/A	N/A	N/A	N/A	N/A	N	N/A	N/A	N/A
N/A	N/A	PPAS0D09030	N/A	N/A	1519	N/A	N/A	N/A	N/A	N/A	Y	N	N/A	N/A	N	N/A	N/A	N/A	N/A	N/A	N/A	N/A	N/A	N/A	N/A	N/A	N/A	N/A	N/A	N/A	N/A	N	N/A	N/A	N/A
N/A	N/A	PPAS0D09060	N/A	N/A	1520	N/A	N/A	N/A	N/A	N/A	Y	N	N/A	N/A	N	N/A	N/A	N/A	N/A	N/A	N/A	N/A	3.84935	yes	-0.279349	no	N/A	N/A	N/A	N/A	N/A	N	N/A	N/A	N/A
N/A	N/A	PPAS0D09070	N/A	N/A	1521	N/A	N/A	N/A	N/A	N/A	N	N	N/A	N/A	N	N/A	N/A	N/A	N/A	N/A	N/A	N/A	-0.521152	no	0.0280207	no	N/A	N/A	N/A	N/A	N/A	N	N/A	N/A	N/A
N/A	N/A	PPAS0D09080	N/A	N/A	1522	N/A	N/A	N/A	N/A	N/A	N	N	N/A	N/A	N	N/A	N/A	N/A	N/A	N/A	N/A	N/A	1.09626	yes	-0.207049	no	N/A	N/A	N/A	N/A	N/A	N	N/A	N/A	N/A
N/A	N/A	PPAS0D09100	N/A	N/A	1523	N/A	N/A	N/A	N/A	N/A	Y	N	N/A	N/A	N	N/A	N/A	N/A	N/A	N/A	N/A	N/A	0.791274	yes	-1.00233	yes	N/A	N/A	N/A	N/A	N/A	N	N/A	N/A	N/A
N/A	N/A	PPAS0D09190	N/A	N/A	1524	N/A	N/A	N/A	N/A	N/A	Y	N	N/A	N/A	N	N/A	N/A	N/A	N/A	N/A	N/A	N/A	3.47116	no	-0.616721	no	N/A	N/A	N/A	N/A	N/A	N	N/A	N/A	N/A
N/A	N/A	PPAS0D09200	N/A	N/A	1525	N/A	N/A	N/A	N/A	N/A	Y	N	N/A	N/A	N	N/A	N/A	N/A	N/A	N/A	N/A	N/A	1.26344	yes	-0.425285	no	N/A	N/A	N/A	N/A	N/A	N	N/A	N/A	N/A
N/A	N/A	PPAS0D09260	N/A	N/A	1526	N/A	N/A	N/A	N/A	N/A	N	N	N/A	N/A	N	N/A	N/A	N/A	N/A	N/A	N/A	N/A	1.13396	no	-0.378038	no	N/A	N/A	N/A	N/A	N/A	N	N/A	N/A	N/A
N/A	N/A	PPAS0D09300	N/A	N/A	1527	N/A	N/A	N/A	N/A	N/A	Y	N	N/A	N/A	N	N/A	N/A	N/A	N/A	N/A	N/A	N/A	-0.00118301	no	-0.293884	no	N/A	N/A	N/A	N/A	N/A	Y	N/A	N/A	N/A
N/A	N/A	PPAS0D09340	N/A	N/A	1528	N/A	N/A	N/A	N/A	N/A	N	N	N/A	N/A	N	N/A	N/A	N/A	N/A	N/A	N/A	N/A	0.227577	no	0.194222	no	N/A	N/A	N/A	N/A	N/A	Y	N/A	N/A	N/A
N/A	N/A	PPAS0D09360	N/A	N/A	1529	N/A	N/A	N/A	N/A	N/A	N	N	N/A	N/A	N	N/A	N/A	N/A	N/A	N/A	N/A	N/A	0.92821	no	0.0905693	no	N/A	N/A	N/A	N/A	N/A	N	N/A	N/A	N/A
N/A	N/A	PPAS0D09380	N/A	N/A	1530	N/A	N/A	N/A	N/A	N/A	N	N	N/A	N/A	N	N/A	N/A	N/A	N/A	N/A	N/A	N/A	N/A	N/A	N/A	N/A	N/A	N/A	N/A	N/A	N/A	N	N/A	N/A	N/A
N/A	N/A	PPAS0D09390	N/A	N/A	1531	N/A	N/A	N/A	N/A	N/A	N	N	N/A	N/A	N	N/A	N/A	N/A	N/A	N/A	N/A	N/A	N/A	N/A	N/A	N/A	N/A	N/A	N/A	N/A	N/A	Y	N/A	N/A	N/A
N/A	N/A	PPAS0D09400	N/A	N/A	1532	N/A	N/A	N/A	N/A	N/A	N	N	N/A	N/A	N	N/A	N/A	N/A	N/A	N/A	N/A	N/A	-2.14612	no	0.130895	no	N/A	N/A	N/A	N/A	N/A	N	N/A	N/A	N/A
N/A	N/A	PPAS0D09450	N/A	N/A	1533	N/A	N/A	N/A	N/A	N/A	N	N	N/A	N/A	N	N/A	N/A	N/A	N/A	N/A	N/A	N/A	0.750536	no	0.254578	no	N/A	N/A	N/A	N/A	N/A	N	N/A	N/A	N/A
N/A	N/A	PPAS0D09520	N/A	N/A	1534	N/A	N/A	N/A	N/A	N/A	N	N	N/A	N/A	N	N/A	N/A	N/A	N/A	N/A	N/A	N/A	N/A	N/A	N/A	N/A	N/A	N/A	N/A	N/A	N/A	Y	N/A	N/A	N/A
N/A	N/A	PPAS0D09540	N/A	N/A	1535	N/A	N/A	N/A	N/A	N/A	N	N	N/A	N/A	N	N/A	N/A	N/A	N/A	N/A	N/A	N/A	N/A	N/A	N/A	N/A	N/A	N/A	N/A	N/A	N/A	N	N/A	N/A	N/A
N/A	N/A	PPAS0D09560	N/A	N/A	1536	N/A	N/A	N/A	N/A	N/A	N	N	N/A	N/A	N	N/A	N/A	N/A	N/A	N/A	N/A	N/A	-0.470882	no	0.126748	no	N/A	N/A	N/A	N/A	N/A	N	N/A	N/A	N/A
N/A	N/A	PPAS0D09640	N/A	N/A	1537	N/A	N/A	N/A	N/A	N/A	Y	N	N/A	N/A	N	N/A	N/A	N/A	N/A	N/A	N/A	N/A	0.53248	no	0.153134	no	N/A	N/A	N/A	N/A	N/A	Y	N/A	N/A	N/A
N/A	N/A	PPAS0D09660	N/A	N/A	1538	N/A	N/A	N/A	N/A	N/A	Y	N	N/A	N/A	N	N/A	N/A	N/A	N/A	N/A	N/A	N/A	-0.926634	yes	-1.25819	yes	N/A	N/A	N/A	N/A	N/A	Y	N/A	N/A	N/A
N/A	N/A	PPAS0D09670	N/A	N/A	1539	N/A	N/A	N/A	N/A	N/A	N	N	N/A	N/A	N	N/A	N/A	N/A	N/A	N/A	N/A	N/A	0.373427	no	0.318877	no	N/A	N/A	N/A	N/A	N/A	N	N/A	N/A	N/A
N/A	N/A	PPAS0D09680	N/A	N/A	1540	N/A	N/A	N/A	N/A	N/A	N	N	N/A	N/A	N	N/A	N/A	N/A	N/A	N/A	N/A	N/A	-1.35236	yes	0.169341	no	N/A	N/A	N/A	N/A	N/A	N	N/A	N/A	N/A
N/A	N/A	PPAS0D09690	N/A	N/A	1541	N/A	N/A	N/A	N/A	N/A	N	N	N/A	N/A	N	N/A	N/A	N/A	N/A	N/A	N/A	N/A	N/A	N/A	N/A	N/A	N/A	N/A	N/A	N/A	N/A	N	N/A	N/A	N/A
N/A	N/A	PPAS0D09700	N/A	N/A	1542	N/A	N/A	N/A	N/A	N/A	N	N	N/A	N/A	N	N/A	N/A	N/A	N/A	N/A	N/A	N/A	2.18432	yes	0.171572	no	N/A	N/A	N/A	N/A	N/A	N	N/A	N/A	N/A
N/A	N/A	PPAS0D09710	N/A	N/A	1543	N/A	N/A	N/A	N/A	N/A	N	N	N/A	N/A	N	N/A	N/A	N/A	N/A	N/A	N/A	N/A	1.6378	yes	0.156886	no	N/A	N/A	N/A	N/A	N/A	Y	N/A	N/A	N/A
N/A	N/A	PPAS0D09720	N/A	N/A	1544	N/A	N/A	N/A	N/A	N/A	Y	N	N/A	N/A	N	N/A	N/A	N/A	N/A	N/A	N/A	N/A	-3.34601	yes	-0.0437008	no	N/A	N/A	N/A	N/A	N/A	Y	N/A	N/A	N/A
N/A	N/A	PPAS0D09730	N/A	N/A	1545	N/A	N/A	N/A	N/A	N/A	N	N	N/A	N/A	N	N/A	N/A	N/A	N/A	N/A	N/A	N/A	-3.34601	yes	-0.0437008	no	N/A	N/A	N/A	N/A	N/A	N	N/A	N/A	N/A
N/A	N/A	PPAS0D09740	N/A	N/A	1546	N/A	N/A	N/A	N/A	N/A	Y	N	N/A	N/A	N	N/A	N/A	N/A	N/A	N/A	N/A	N/A	2.63606	yes	-0.892744	yes	N/A	N/A	N/A	N/A	N/A	Y	N/A	N/A	N/A
N/A	N/A	PPAS0D09750	N/A	N/A	1547	N/A	N/A	N/A	N/A	N/A	Y	N	N/A	N/A	N	N/A	N/A	N/A	N/A	N/A	N/A	N/A	2.05456	no	-1.25205	no	N/A	N/A	N/A	N/A	N/A	Y	N/A	N/A	N/A
N/A	N/A	PPAS0D09760	N/A	N/A	1548	N/A	N/A	N/A	N/A	N/A	Y	N	N/A	N/A	N	N/A	N/A	N/A	N/A	N/A	N/A	N/A	-1.2526	yes	-0.365274	no	N/A	N/A	N/A	N/A	N/A	Y	N/A	N/A	N/A
N/A	N/A	PPAS0D09770	N/A	N/A	1549	N/A	N/A	N/A	N/A	N/A	Y	N	N/A	N/A	N	N/A	N/A	N/A	N/A	N/A	N/A	N/A	0.587903	no	-0.109474	no	N/A	N/A	N/A	N/A	N/A	Y	N/A	N/A	N/A
N/A	N/A	PPAS0D09780	N/A	N/A	1550	N/A	N/A	N/A	N/A	N/A	N	N	N/A	N/A	N	N/A	N/A	N/A	N/A	N/A	N/A	N/A	1.05568	no	0.229063	no	N/A	N/A	N/A	N/A	N/A	Y	N/A	N/A	N/A
N/A	N/A	PPAS0D09790	N/A	N/A	1551	N/A	N/A	N/A	N/A	N/A	N	N	N/A	N/A	N	N/A	N/A	N/A	N/A	N/A	N/A	N/A	1.05568	no	0.229063	no	N/A	N/A	N/A	N/A	N/A	N	N/A	N/A	N/A
N/A	N/A	PPAS0D09800	N/A	N/A	1552	N/A	N/A	N/A	N/A	N/A	N	N	N/A	N/A	N	N/A	N/A	N/A	N/A	N/A	N/A	N/A	-1.04002	yes	-0.73345	yes	N/A	N/A	N/A	N/A	N/A	Y	N/A	N/A	N/A
N/A	N/A	PPAS0D09810	N/A	N/A	1553	N/A	N/A	N/A	N/A	N/A	N	N	N/A	N/A	N	N/A	N/A	N/A	N/A	N/A	N/A	N/A	-1.04002	yes	-0.73345	yes	N/A	N/A	N/A	N/A	N/A	N	N/A	N/A	N/A
N/A	N/A	N/A	PICST_11039	N/A	1554	N/A	N/A	N/A	N/A	N/A	N/A	Y	Y	Y	N	N/A	N/A	N/A	N/A	N/A	N/A	N/A	N/A	N/A	N/A	N/A	N/A	N/A	N/A	N/A	N/A	N/A	N	N/A	N/A
N/A	N/A	N/A	PICST_11162	N/A	1555	N/A	N/A	N/A	N/A	N/A	N/A	N	N	N	N	N/A	N/A	N/A	N/A	N/A	N/A	N/A	N/A	N/A	N/A	N/A	N/A	N/A	N/A	N/A	N/A	N/A	N	N/A	N/A
N/A	N/A	N/A	PICST_11314	N/A	1556	N/A	N/A	N/A	N/A	N/A	N/A	N	N	N	N	N/A	N/A	N/A	N/A	N/A	N/A	N/A	N/A	N/A	N/A	N/A	N/A	N/A	N/A	N/A	N/A	N/A	Y	N/A	N/A
N/A	N/A	N/A	PICST_11329	N/A	1557	N/A	N/A	N/A	N/A	N/A	N/A	N	N	N	N	N/A	N/A	N/A	N/A	N/A	N/A	N/A	N/A	N/A	N/A	N/A	N/A	N/A	N/A	N/A	N/A	N/A	N	N/A	N/A
N/A	N/A	N/A	PICST_13204	N/A	1558	N/A	N/A	N/A	N/A	N/A	N/A	Y	Y	Y	N	N/A	N/A	N/A	N/A	N/A	N/A	N/A	N/A	N/A	N/A	N/A	N/A	N/A	N/A	N/A	N/A	N/A	Y	N/A	N/A
N/A	N/A	N/A	PICST_14352	N/A	1559	N/A	N/A	N/A	N/A	N/A	N/A	N	N	N	N	N/A	N/A	N/A	N/A	N/A	N/A	N/A	N/A	N/A	N/A	N/A	N/A	N/A	N/A	N/A	N/A	N/A	Y	N/A	N/A
N/A	N/A	N/A	PICST_1541	N/A	1560	N/A	N/A	N/A	N/A	N/A	N/A	N	N	N	N	N/A	N/A	N/A	N/A	N/A	N/A	N/A	N/A	N/A	N/A	N/A	N/A	N/A	N/A	N/A	N/A	N/A	Y	N/A	N/A
N/A	N/A	N/A	PICST_167	N/A	1561	N/A	N/A	N/A	N/A	N/A	N/A	Y	N	Y	N	N/A	N/A	N/A	N/A	N/A	N/A	N/A	N/A	N/A	N/A	N/A	N/A	N/A	N/A	N/A	N/A	N/A	N	N/A	N/A
N/A	N/A	N/A	PICST_17369	N/A	1562	N/A	N/A	N/A	N/A	N/A	N/A	Y	N	Y	N	N/A	N/A	N/A	N/A	N/A	N/A	N/A	N/A	N/A	N/A	N/A	N/A	N/A	N/A	N/A	N/A	N/A	N	N/A	N/A
N/A	N/A	N/A	PICST_17474	N/A	1563	N/A	N/A	N/A	N/A	N/A	N/A	Y	Y	Y	N	N/A	N/A	N/A	N/A	N/A	N/A	N/A	N/A	N/A	N/A	N/A	N/A	N/A	N/A	N/A	N/A	N/A	Y	N/A	N/A
N/A	N/A	N/A	PICST_17616	N/A	1564	N/A	N/A	N/A	N/A	N/A	N/A	N	N	N	N	N/A	N/A	N/A	N/A	N/A	N/A	N/A	N/A	N/A	N/A	N/A	N/A	N/A	N/A	N/A	N/A	N/A	N	N/A	N/A
N/A	N/A	N/A	PICST_17868	N/A	1565	N/A	N/A	N/A	N/A	N/A	N/A	N	N	N	N	N/A	N/A	N/A	N/A	N/A	N/A	N/A	N/A	N/A	N/A	N/A	N/A	N/A	N/A	N/A	N/A	N/A	N	N/A	N/A
N/A	N/A	N/A	PICST_19389	N/A	1566	N/A	N/A	N/A	N/A	N/A	N/A	N	N	N	N	N/A	N/A	N/A	N/A	N/A	N/A	N/A	N/A	N/A	N/A	N/A	N/A	N/A	N/A	N/A	N/A	N/A	Y	N/A	N/A
N/A	N/A	N/A	PICST_26814	N/A	1567	N/A	N/A	N/A	N/A	N/A	N/A	N	N	N	N	N/A	N/A	N/A	N/A	N/A	N/A	N/A	N/A	N/A	N/A	N/A	N/A	N/A	N/A	N/A	N/A	N/A	N	N/A	N/A
N/A	N/A	N/A	PICST_27661	N/A	1568	N/A	N/A	N/A	N/A	N/A	N/A	N	N	N	N	N/A	N/A	N/A	N/A	N/A	N/A	N/A	N/A	N/A	N/A	N/A	N/A	N/A	N/A	N/A	N/A	N/A	Y	N/A	N/A
N/A	N/A	N/A	PICST_27939	N/A	1569	N/A	N/A	N/A	N/A	N/A	N/A	N	N	N	N	N/A	N/A	N/A	N/A	N/A	N/A	N/A	N/A	N/A	N/A	N/A	N/A	N/A	N/A	N/A	N/A	N/A	N	N/A	N/A
N/A	N/A	N/A	PICST_27944	N/A	1570	N/A	N/A	N/A	N/A	N/A	N/A	Y	N	Y	N	N/A	N/A	N/A	N/A	N/A	N/A	N/A	N/A	N/A	N/A	N/A	N/A	N/A	N/A	N/A	N/A	N/A	N	N/A	N/A
N/A	N/A	N/A	PICST_27983	N/A	1571	N/A	N/A	N/A	N/A	N/A	N/A	Y	Y	Y	N	N/A	N/A	N/A	N/A	N/A	N/A	N/A	N/A	N/A	N/A	N/A	N/A	N/A	N/A	N/A	N/A	N/A	Y	N/A	N/A
N/A	N/A	N/A	PICST_27984	N/A	1572	N/A	N/A	N/A	N/A	N/A	N/A	Y	N	Y	N	N/A	N/A	N/A	N/A	N/A	N/A	N/A	N/A	N/A	N/A	N/A	N/A	N/A	N/A	N/A	N/A	N/A	Y	N/A	N/A
N/A	N/A	N/A	PICST_27987	N/A	1573	N/A	N/A	N/A	N/A	N/A	N/A	Y	Y	Y	N	N/A	N/A	N/A	N/A	N/A	N/A	N/A	N/A	N/A	N/A	N/A	N/A	N/A	N/A	N/A	N/A	N/A	Y	N/A	N/A
N/A	N/A	N/A	PICST_27988	N/A	1574	N/A	N/A	N/A	N/A	N/A	N/A	Y	Y	Y	N	N/A	N/A	N/A	N/A	N/A	N/A	N/A	N/A	N/A	N/A	N/A	N/A	N/A	N/A	N/A	N/A	N/A	Y	N/A	N/A
N/A	N/A	N/A	PICST_27989	N/A	1575	N/A	N/A	N/A	N/A	N/A	N/A	N	N	N	N	N/A	N/A	N/A	N/A	N/A	N/A	N/A	N/A	N/A	N/A	N/A	N/A	N/A	N/A	N/A	N/A	N/A	N	N/A	N/A
N/A	N/A	N/A	PICST_28003	N/A	1576	N/A	N/A	N/A	N/A	N/A	N/A	N	N	N	N	N/A	N/A	N/A	N/A	N/A	N/A	N/A	N/A	N/A	N/A	N/A	N/A	N/A	N/A	N/A	N/A	N/A	N	N/A	N/A
N/A	N/A	N/A	PICST_28004	N/A	1577	N/A	N/A	N/A	N/A	N/A	N/A	N	N	N	N	N/A	N/A	N/A	N/A	N/A	N/A	N/A	N/A	N/A	N/A	N/A	N/A	N/A	N/A	N/A	N/A	N/A	N	N/A	N/A
N/A	N/A	N/A	PICST_28027	N/A	1578	N/A	N/A	N/A	N/A	N/A	N/A	N	N	N	N	N/A	N/A	N/A	N/A	N/A	N/A	N/A	N/A	N/A	N/A	N/A	N/A	N/A	N/A	N/A	N/A	N/A	N	N/A	N/A
N/A	N/A	N/A	PICST_28102	N/A	1579	N/A	N/A	N/A	N/A	N/A	N/A	N	N	N	N	N/A	N/A	N/A	N/A	N/A	N/A	N/A	N/A	N/A	N/A	N/A	N/A	N/A	N/A	N/A	N/A	N/A	N	N/A	N/A
N/A	N/A	N/A	PICST_28139	N/A	1580	N/A	N/A	N/A	N/A	N/A	N/A	N	N	N	N	N/A	N/A	N/A	N/A	N/A	N/A	N/A	N/A	N/A	N/A	N/A	N/A	N/A	N/A	N/A	N/A	N/A	N	N/A	N/A
N/A	N/A	N/A	PICST_28157	N/A	1581	N/A	N/A	N/A	N/A	N/A	N/A	N	N	N	N	N/A	N/A	N/A	N/A	N/A	N/A	N/A	N/A	N/A	N/A	N/A	N/A	N/A	N/A	N/A	N/A	N/A	N	N/A	N/A
N/A	N/A	N/A	PICST_28181	N/A	1582	N/A	N/A	N/A	N/A	N/A	N/A	N	N	N	N	N/A	N/A	N/A	N/A	N/A	N/A	N/A	N/A	N/A	N/A	N/A	N/A	N/A	N/A	N/A	N/A	N/A	N	N/A	N/A
N/A	N/A	N/A	PICST_28187	N/A	1583	N/A	N/A	N/A	N/A	N/A	N/A	N	N	N	N	N/A	N/A	N/A	N/A	N/A	N/A	N/A	N/A	N/A	N/A	N/A	N/A	N/A	N/A	N/A	N/A	N/A	N	N/A	N/A
N/A	N/A	N/A	PICST_28198	N/A	1584	N/A	N/A	N/A	N/A	N/A	N/A	N	N	N	N	N/A	N/A	N/A	N/A	N/A	N/A	N/A	N/A	N/A	N/A	N/A	N/A	N/A	N/A	N/A	N/A	N/A	N	N/A	N/A
N/A	N/A	N/A	PICST_28199	N/A	1585	N/A	N/A	N/A	N/A	N/A	N/A	N	N	N	N	N/A	N/A	N/A	N/A	N/A	N/A	N/A	N/A	N/A	N/A	N/A	N/A	N/A	N/A	N/A	N/A	N/A	N	N/A	N/A
N/A	N/A	N/A	PICST_28220	N/A	1586	N/A	N/A	N/A	N/A	N/A	N/A	N	N	N	N	N/A	N/A	N/A	N/A	N/A	N/A	N/A	N/A	N/A	N/A	N/A	N/A	N/A	N/A	N/A	N/A	N/A	N	N/A	N/A
N/A	N/A	N/A	PICST_28225	N/A	1587	N/A	N/A	N/A	N/A	N/A	N/A	N	N	N	N	N/A	N/A	N/A	N/A	N/A	N/A	N/A	N/A	N/A	N/A	N/A	N/A	N/A	N/A	N/A	N/A	N/A	N	N/A	N/A
N/A	N/A	N/A	PICST_28231	N/A	1588	N/A	N/A	N/A	N/A	N/A	N/A	N	N	N	N	N/A	N/A	N/A	N/A	N/A	N/A	N/A	N/A	N/A	N/A	N/A	N/A	N/A	N/A	N/A	N/A	N/A	N	N/A	N/A
N/A	N/A	N/A	PICST_28260	N/A	1589	N/A	N/A	N/A	N/A	N/A	N/A	N	N	N	N	N/A	N/A	N/A	N/A	N/A	N/A	N/A	N/A	N/A	N/A	N/A	N/A	N/A	N/A	N/A	N/A	N/A	N	N/A	N/A
N/A	N/A	N/A	PICST_28326	N/A	1590	N/A	N/A	N/A	N/A	N/A	N/A	N	N	N	N	N/A	N/A	N/A	N/A	N/A	N/A	N/A	N/A	N/A	N/A	N/A	N/A	N/A	N/A	N/A	N/A	N/A	N	N/A	N/A
N/A	N/A	N/A	PICST_28339	N/A	1591	N/A	N/A	N/A	N/A	N/A	N/A	N	N	N	N	N/A	N/A	N/A	N/A	N/A	N/A	N/A	N/A	N/A	N/A	N/A	N/A	N/A	N/A	N/A	N/A	N/A	N	N/A	N/A
N/A	N/A	N/A	PICST_28340	N/A	1592	N/A	N/A	N/A	N/A	N/A	N/A	N	N	N	N	N/A	N/A	N/A	N/A	N/A	N/A	N/A	N/A	N/A	N/A	N/A	N/A	N/A	N/A	N/A	N/A	N/A	N	N/A	N/A
N/A	N/A	N/A	PICST_28392	N/A	1593	N/A	N/A	N/A	N/A	N/A	N/A	N	N	N	N	N/A	N/A	N/A	N/A	N/A	N/A	N/A	N/A	N/A	N/A	N/A	N/A	N/A	N/A	N/A	N/A	N/A	N	N/A	N/A
N/A	N/A	N/A	PICST_28415	N/A	1594	N/A	N/A	N/A	N/A	N/A	N/A	N	N	N	N	N/A	N/A	N/A	N/A	N/A	N/A	N/A	N/A	N/A	N/A	N/A	N/A	N/A	N/A	N/A	N/A	N/A	N	N/A	N/A
N/A	N/A	N/A	PICST_28493	N/A	1595	N/A	N/A	N/A	N/A	N/A	N/A	N	N	N	N	N/A	N/A	N/A	N/A	N/A	N/A	N/A	N/A	N/A	N/A	N/A	N/A	N/A	N/A	N/A	N/A	N/A	N	N/A	N/A
N/A	N/A	N/A	PICST_28494	N/A	1596	N/A	N/A	N/A	N/A	N/A	N/A	N	N	N	N	N/A	N/A	N/A	N/A	N/A	N/A	N/A	N/A	N/A	N/A	N/A	N/A	N/A	N/A	N/A	N/A	N/A	N	N/A	N/A
N/A	N/A	N/A	PICST_28495	N/A	1597	N/A	N/A	N/A	N/A	N/A	N/A	N	N	N	N	N/A	N/A	N/A	N/A	N/A	N/A	N/A	N/A	N/A	N/A	N/A	N/A	N/A	N/A	N/A	N/A	N/A	N	N/A	N/A
N/A	N/A	N/A	PICST_28496	N/A	1598	N/A	N/A	N/A	N/A	N/A	N/A	N	N	N	N	N/A	N/A	N/A	N/A	N/A	N/A	N/A	N/A	N/A	N/A	N/A	N/A	N/A	N/A	N/A	N/A	N/A	N	N/A	N/A
N/A	N/A	N/A	PICST_28524	N/A	1599	N/A	N/A	N/A	N/A	N/A	N/A	N	N	N	N	N/A	N/A	N/A	N/A	N/A	N/A	N/A	N/A	N/A	N/A	N/A	N/A	N/A	N/A	N/A	N/A	N/A	N	N/A	N/A
N/A	N/A	N/A	PICST_28545	N/A	1600	N/A	N/A	N/A	N/A	N/A	N/A	N	N	N	N	N/A	N/A	N/A	N/A	N/A	N/A	N/A	N/A	N/A	N/A	N/A	N/A	N/A	N/A	N/A	N/A	N/A	N	N/A	N/A
N/A	N/A	N/A	PICST_28601	N/A	1601	N/A	N/A	N/A	N/A	N/A	N/A	N	N	N	N	N/A	N/A	N/A	N/A	N/A	N/A	N/A	N/A	N/A	N/A	N/A	N/A	N/A	N/A	N/A	N/A	N/A	N	N/A	N/A
N/A	N/A	N/A	PICST_28602	N/A	1602	N/A	N/A	N/A	N/A	N/A	N/A	N	N	N	N	N/A	N/A	N/A	N/A	N/A	N/A	N/A	N/A	N/A	N/A	N/A	N/A	N/A	N/A	N/A	N/A	N/A	N	N/A	N/A
N/A	N/A	N/A	PICST_28603	N/A	1603	N/A	N/A	N/A	N/A	N/A	N/A	N	N	N	N	N/A	N/A	N/A	N/A	N/A	N/A	N/A	N/A	N/A	N/A	N/A	N/A	N/A	N/A	N/A	N/A	N/A	N	N/A	N/A
N/A	N/A	N/A	PICST_28615	N/A	1604	N/A	N/A	N/A	N/A	N/A	N/A	N	N	N	N	N/A	N/A	N/A	N/A	N/A	N/A	N/A	N/A	N/A	N/A	N/A	N/A	N/A	N/A	N/A	N/A	N/A	N	N/A	N/A
N/A	N/A	N/A	PICST_28618	N/A	1605	N/A	N/A	N/A	N/A	N/A	N/A	Y	Y	Y	N	N/A	N/A	N/A	N/A	N/A	N/A	N/A	N/A	N/A	N/A	N/A	N/A	N/A	N/A	N/A	N/A	N/A	N	N/A	N/A
N/A	N/A	N/A	PICST_28697	N/A	1606	N/A	N/A	N/A	N/A	N/A	N/A	Y	N	Y	N	N/A	N/A	N/A	N/A	N/A	N/A	N/A	N/A	N/A	N/A	N/A	N/A	N/A	N/A	N/A	N/A	N/A	N	N/A	N/A
N/A	N/A	N/A	PICST_28702	N/A	1607	N/A	N/A	N/A	N/A	N/A	N/A	N	N	N	N	N/A	N/A	N/A	N/A	N/A	N/A	N/A	N/A	N/A	N/A	N/A	N/A	N/A	N/A	N/A	N/A	N/A	N	N/A	N/A
N/A	N/A	N/A	PICST_28707	N/A	1608	N/A	N/A	N/A	N/A	N/A	N/A	Y	N	Y	N	N/A	N/A	N/A	N/A	N/A	N/A	N/A	N/A	N/A	N/A	N/A	N/A	N/A	N/A	N/A	N/A	N/A	N	N/A	N/A
N/A	N/A	N/A	PICST_28751	N/A	1609	N/A	N/A	N/A	N/A	N/A	N/A	N	N	N	N	N/A	N/A	N/A	N/A	N/A	N/A	N/A	N/A	N/A	N/A	N/A	N/A	N/A	N/A	N/A	N/A	N/A	Y	N/A	N/A
N/A	N/A	N/A	PICST_28757	N/A	1610	N/A	N/A	N/A	N/A	N/A	N/A	N	N	N	N	N/A	N/A	N/A	N/A	N/A	N/A	N/A	N/A	N/A	N/A	N/A	N/A	N/A	N/A	N/A	N/A	N/A	N	N/A	N/A
N/A	N/A	N/A	PICST_28758	N/A	1611	N/A	N/A	N/A	N/A	N/A	N/A	N	N	N	N	N/A	N/A	N/A	N/A	N/A	N/A	N/A	N/A	N/A	N/A	N/A	N/A	N/A	N/A	N/A	N/A	N/A	N	N/A	N/A
N/A	N/A	N/A	PICST_28774	N/A	1612	N/A	N/A	N/A	N/A	N/A	N/A	Y	N	Y	N	N/A	N/A	N/A	N/A	N/A	N/A	N/A	N/A	N/A	N/A	N/A	N/A	N/A	N/A	N/A	N/A	N/A	Y	N/A	N/A
N/A	N/A	N/A	PICST_28789	N/A	1613	N/A	N/A	N/A	N/A	N/A	N/A	N	N	N	N	N/A	N/A	N/A	N/A	N/A	N/A	N/A	N/A	N/A	N/A	N/A	N/A	N/A	N/A	N/A	N/A	N/A	Y	N/A	N/A
N/A	N/A	N/A	PICST_28797	N/A	1614	N/A	N/A	N/A	N/A	N/A	N/A	N	N	N	N	N/A	N/A	N/A	N/A	N/A	N/A	N/A	N/A	N/A	N/A	N/A	N/A	N/A	N/A	N/A	N/A	N/A	N	N/A	N/A
N/A	N/A	N/A	PICST_28803	N/A	1615	N/A	N/A	N/A	N/A	N/A	N/A	N	N	N	N	N/A	N/A	N/A	N/A	N/A	N/A	N/A	N/A	N/A	N/A	N/A	N/A	N/A	N/A	N/A	N/A	N/A	N	N/A	N/A
N/A	N/A	N/A	PICST_28825	N/A	1616	N/A	N/A	N/A	N/A	N/A	N/A	N	N	N	N	N/A	N/A	N/A	N/A	N/A	N/A	N/A	N/A	N/A	N/A	N/A	N/A	N/A	N/A	N/A	N/A	N/A	Y	N/A	N/A
N/A	N/A	N/A	PICST_28827	N/A	1617	N/A	N/A	N/A	N/A	N/A	N/A	Y	Y	Y	N	N/A	N/A	N/A	N/A	N/A	N/A	N/A	N/A	N/A	N/A	N/A	N/A	N/A	N/A	N/A	N/A	N/A	Y	N/A	N/A
N/A	N/A	N/A	PICST_28836	N/A	1618	N/A	N/A	N/A	N/A	N/A	N/A	N	N	N	N	N/A	N/A	N/A	N/A	N/A	N/A	N/A	N/A	N/A	N/A	N/A	N/A	N/A	N/A	N/A	N/A	N/A	N	N/A	N/A
N/A	N/A	N/A	PICST_28839	N/A	1619	N/A	N/A	N/A	N/A	N/A	N/A	Y	N	Y	N	N/A	N/A	N/A	N/A	N/A	N/A	N/A	N/A	N/A	N/A	N/A	N/A	N/A	N/A	N/A	N/A	N/A	N	N/A	N/A
N/A	N/A	N/A	PICST_28851	N/A	1620	N/A	N/A	N/A	N/A	N/A	N/A	Y	Y	Y	N	N/A	N/A	N/A	N/A	N/A	N/A	N/A	N/A	N/A	N/A	N/A	N/A	N/A	N/A	N/A	N/A	N/A	Y	N/A	N/A
N/A	N/A	N/A	PICST_28859	N/A	1621	N/A	N/A	N/A	N/A	N/A	N/A	N	N	N	N	N/A	N/A	N/A	N/A	N/A	N/A	N/A	N/A	N/A	N/A	N/A	N/A	N/A	N/A	N/A	N/A	N/A	Y	N/A	N/A
N/A	N/A	N/A	PICST_28862	N/A	1622	N/A	N/A	N/A	N/A	N/A	N/A	N	N	N	N	N/A	N/A	N/A	N/A	N/A	N/A	N/A	N/A	N/A	N/A	N/A	N/A	N/A	N/A	N/A	N/A	N/A	Y	N/A	N/A
N/A	N/A	N/A	PICST_28879	N/A	1623	N/A	N/A	N/A	N/A	N/A	N/A	Y	N	Y	N	N/A	N/A	N/A	N/A	N/A	N/A	N/A	N/A	N/A	N/A	N/A	N/A	N/A	N/A	N/A	N/A	N/A	Y	N/A	N/A
N/A	N/A	N/A	PICST_28888	N/A	1624	N/A	N/A	N/A	N/A	N/A	N/A	N	N	N	N	N/A	N/A	N/A	N/A	N/A	N/A	N/A	N/A	N/A	N/A	N/A	N/A	N/A	N/A	N/A	N/A	N/A	N	N/A	N/A
N/A	N/A	N/A	PICST_28899	N/A	1625	N/A	N/A	N/A	N/A	N/A	N/A	Y	Y	Y	N	N/A	N/A	N/A	N/A	N/A	N/A	N/A	N/A	N/A	N/A	N/A	N/A	N/A	N/A	N/A	N/A	N/A	Y	N/A	N/A
N/A	N/A	N/A	PICST_28904	N/A	1626	N/A	N/A	N/A	N/A	N/A	N/A	Y	N	Y	N	N/A	N/A	N/A	N/A	N/A	N/A	N/A	N/A	N/A	N/A	N/A	N/A	N/A	N/A	N/A	N/A	N/A	Y	N/A	N/A
N/A	N/A	N/A	PICST_28907	N/A	1627	N/A	N/A	N/A	N/A	N/A	N/A	N	N	N	N	N/A	N/A	N/A	N/A	N/A	N/A	N/A	N/A	N/A	N/A	N/A	N/A	N/A	N/A	N/A	N/A	N/A	Y	N/A	N/A
N/A	N/A	N/A	PICST_28949	N/A	1628	N/A	N/A	N/A	N/A	N/A	N/A	Y	N	Y	N	N/A	N/A	N/A	N/A	N/A	N/A	N/A	N/A	N/A	N/A	N/A	N/A	N/A	N/A	N/A	N/A	N/A	N	N/A	N/A
N/A	N/A	N/A	PICST_28950	N/A	1629	N/A	N/A	N/A	N/A	N/A	N/A	N	N	N	N	N/A	N/A	N/A	N/A	N/A	N/A	N/A	N/A	N/A	N/A	N/A	N/A	N/A	N/A	N/A	N/A	N/A	Y	N/A	N/A
N/A	N/A	N/A	PICST_28970	N/A	1630	N/A	N/A	N/A	N/A	N/A	N/A	Y	Y	Y	N	N/A	N/A	N/A	N/A	N/A	N/A	N/A	N/A	N/A	N/A	N/A	N/A	N/A	N/A	N/A	N/A	N/A	Y	N/A	N/A
N/A	N/A	N/A	PICST_28971	N/A	1631	N/A	N/A	N/A	N/A	N/A	N/A	N	N	N	N	N/A	N/A	N/A	N/A	N/A	N/A	N/A	N/A	N/A	N/A	N/A	N/A	N/A	N/A	N/A	N/A	N/A	N	N/A	N/A
N/A	N/A	N/A	PICST_29026	N/A	1632	N/A	N/A	N/A	N/A	N/A	N/A	N	N	N	N	N/A	N/A	N/A	N/A	N/A	N/A	N/A	N/A	N/A	N/A	N/A	N/A	N/A	N/A	N/A	N/A	N/A	Y	N/A	N/A
N/A	N/A	N/A	PICST_29041	N/A	1633	N/A	N/A	N/A	N/A	N/A	N/A	N	N	N	N	N/A	N/A	N/A	N/A	N/A	N/A	N/A	N/A	N/A	N/A	N/A	N/A	N/A	N/A	N/A	N/A	N/A	Y	N/A	N/A
N/A	N/A	N/A	PICST_29047	N/A	1634	N/A	N/A	N/A	N/A	N/A	N/A	N	N	N	N	N/A	N/A	N/A	N/A	N/A	N/A	N/A	N/A	N/A	N/A	N/A	N/A	N/A	N/A	N/A	N/A	N/A	Y	N/A	N/A
N/A	N/A	N/A	PICST_29079	N/A	1635	N/A	N/A	N/A	N/A	N/A	N/A	N	N	N	N	N/A	N/A	N/A	N/A	N/A	N/A	N/A	N/A	N/A	N/A	N/A	N/A	N/A	N/A	N/A	N/A	N/A	N	N/A	N/A
N/A	N/A	N/A	PICST_29092	N/A	1636	N/A	N/A	N/A	N/A	N/A	N/A	Y	N	Y	N	N/A	N/A	N/A	N/A	N/A	N/A	N/A	N/A	N/A	N/A	N/A	N/A	N/A	N/A	N/A	N/A	N/A	N	N/A	N/A
N/A	N/A	N/A	PICST_29139	N/A	1637	N/A	N/A	N/A	N/A	N/A	N/A	N	N	N	N	N/A	N/A	N/A	N/A	N/A	N/A	N/A	N/A	N/A	N/A	N/A	N/A	N/A	N/A	N/A	N/A	N/A	N	N/A	N/A
N/A	N/A	N/A	PICST_29149	N/A	1638	N/A	N/A	N/A	N/A	N/A	N/A	Y	N	Y	N	N/A	N/A	N/A	N/A	N/A	N/A	N/A	N/A	N/A	N/A	N/A	N/A	N/A	N/A	N/A	N/A	N/A	N	N/A	N/A
N/A	N/A	N/A	PICST_29159	N/A	1639	N/A	N/A	N/A	N/A	N/A	N/A	Y	N	Y	N	N/A	N/A	N/A	N/A	N/A	N/A	N/A	N/A	N/A	N/A	N/A	N/A	N/A	N/A	N/A	N/A	N/A	Y	N/A	N/A
N/A	N/A	N/A	PICST_29187	N/A	1640	N/A	N/A	N/A	N/A	N/A	N/A	Y	Y	Y	N	N/A	N/A	N/A	N/A	N/A	N/A	N/A	N/A	N/A	N/A	N/A	N/A	N/A	N/A	N/A	N/A	N/A	N	N/A	N/A
N/A	N/A	N/A	PICST_29193	N/A	1641	N/A	N/A	N/A	N/A	N/A	N/A	N	N	N	N	N/A	N/A	N/A	N/A	N/A	N/A	N/A	N/A	N/A	N/A	N/A	N/A	N/A	N/A	N/A	N/A	N/A	N	N/A	N/A
N/A	N/A	N/A	PICST_29209	N/A	1642	N/A	N/A	N/A	N/A	N/A	N/A	Y	Y	Y	N	N/A	N/A	N/A	N/A	N/A	N/A	N/A	N/A	N/A	N/A	N/A	N/A	N/A	N/A	N/A	N/A	N/A	Y	N/A	N/A
N/A	N/A	N/A	PICST_29215	N/A	1643	N/A	N/A	N/A	N/A	N/A	N/A	N	N	N	N	N/A	N/A	N/A	N/A	N/A	N/A	N/A	N/A	N/A	N/A	N/A	N/A	N/A	N/A	N/A	N/A	N/A	Y	N/A	N/A
N/A	N/A	N/A	PICST_29233	N/A	1644	N/A	N/A	N/A	N/A	N/A	N/A	Y	N	Y	N	N/A	N/A	N/A	N/A	N/A	N/A	N/A	N/A	N/A	N/A	N/A	N/A	N/A	N/A	N/A	N/A	N/A	Y	N/A	N/A
N/A	N/A	N/A	PICST_29257	N/A	1645	N/A	N/A	N/A	N/A	N/A	N/A	N	N	N	N	N/A	N/A	N/A	N/A	N/A	N/A	N/A	N/A	N/A	N/A	N/A	N/A	N/A	N/A	N/A	N/A	N/A	Y	N/A	N/A
N/A	N/A	N/A	PICST_29260	N/A	1646	N/A	N/A	N/A	N/A	N/A	N/A	Y	N	Y	N	N/A	N/A	N/A	N/A	N/A	N/A	N/A	N/A	N/A	N/A	N/A	N/A	N/A	N/A	N/A	N/A	N/A	N	N/A	N/A
N/A	N/A	N/A	PICST_29266	N/A	1647	N/A	N/A	N/A	N/A	N/A	N/A	Y	N	Y	N	N/A	N/A	N/A	N/A	N/A	N/A	N/A	N/A	N/A	N/A	N/A	N/A	N/A	N/A	N/A	N/A	N/A	Y	N/A	N/A
N/A	N/A	N/A	PICST_29268	N/A	1648	N/A	N/A	N/A	N/A	N/A	N/A	N	N	N	N	N/A	N/A	N/A	N/A	N/A	N/A	N/A	N/A	N/A	N/A	N/A	N/A	N/A	N/A	N/A	N/A	N/A	N	N/A	N/A
N/A	N/A	N/A	PICST_29269	N/A	1649	N/A	N/A	N/A	N/A	N/A	N/A	N	N	N	N	N/A	N/A	N/A	N/A	N/A	N/A	N/A	N/A	N/A	N/A	N/A	N/A	N/A	N/A	N/A	N/A	N/A	Y	N/A	N/A
N/A	N/A	N/A	PICST_29289	N/A	1650	N/A	N/A	N/A	N/A	N/A	N/A	N	N	N	N	N/A	N/A	N/A	N/A	N/A	N/A	N/A	N/A	N/A	N/A	N/A	N/A	N/A	N/A	N/A	N/A	N/A	N	N/A	N/A
N/A	N/A	N/A	PICST_29290	N/A	1651	N/A	N/A	N/A	N/A	N/A	N/A	N	N	N	N	N/A	N/A	N/A	N/A	N/A	N/A	N/A	N/A	N/A	N/A	N/A	N/A	N/A	N/A	N/A	N/A	N/A	Y	N/A	N/A
N/A	N/A	N/A	PICST_29297	N/A	1652	N/A	N/A	N/A	N/A	N/A	N/A	N	N	N	N	N/A	N/A	N/A	N/A	N/A	N/A	N/A	N/A	N/A	N/A	N/A	N/A	N/A	N/A	N/A	N/A	N/A	Y	N/A	N/A
N/A	N/A	N/A	PICST_29300	N/A	1653	N/A	N/A	N/A	N/A	N/A	N/A	N	N	N	N	N/A	N/A	N/A	N/A	N/A	N/A	N/A	N/A	N/A	N/A	N/A	N/A	N/A	N/A	N/A	N/A	N/A	Y	N/A	N/A
N/A	N/A	N/A	PICST_29331	N/A	1654	N/A	N/A	N/A	N/A	N/A	N/A	N	N	N	N	N/A	N/A	N/A	N/A	N/A	N/A	N/A	N/A	N/A	N/A	N/A	N/A	N/A	N/A	N/A	N/A	N/A	N	N/A	N/A
N/A	N/A	N/A	PICST_29340	N/A	1655	N/A	N/A	N/A	N/A	N/A	N/A	N	N	N	N	N/A	N/A	N/A	N/A	N/A	N/A	N/A	N/A	N/A	N/A	N/A	N/A	N/A	N/A	N/A	N/A	N/A	Y	N/A	N/A
N/A	N/A	N/A	PICST_29351	N/A	1656	N/A	N/A	N/A	N/A	N/A	N/A	N	N	N	N	N/A	N/A	N/A	N/A	N/A	N/A	N/A	N/A	N/A	N/A	N/A	N/A	N/A	N/A	N/A	N/A	N/A	N	N/A	N/A
N/A	N/A	N/A	PICST_29369	N/A	1657	N/A	N/A	N/A	N/A	N/A	N/A	N	N	N	N	N/A	N/A	N/A	N/A	N/A	N/A	N/A	N/A	N/A	N/A	N/A	N/A	N/A	N/A	N/A	N/A	N/A	Y	N/A	N/A
N/A	N/A	N/A	PICST_29419	N/A	1658	N/A	N/A	N/A	N/A	N/A	N/A	N	N	N	N	N/A	N/A	N/A	N/A	N/A	N/A	N/A	N/A	N/A	N/A	N/A	N/A	N/A	N/A	N/A	N/A	N/A	Y	N/A	N/A
N/A	N/A	N/A	PICST_29444	N/A	1659	N/A	N/A	N/A	N/A	N/A	N/A	Y	N	Y	N	N/A	N/A	N/A	N/A	N/A	N/A	N/A	N/A	N/A	N/A	N/A	N/A	N/A	N/A	N/A	N/A	N/A	Y	N/A	N/A
N/A	N/A	N/A	PICST_29459	N/A	1660	N/A	N/A	N/A	N/A	N/A	N/A	Y	Y	N	N	N/A	N/A	N/A	N/A	N/A	N/A	N/A	N/A	N/A	N/A	N/A	N/A	N/A	N/A	N/A	N/A	N/A	N	N/A	N/A
N/A	N/A	N/A	PICST_29464	N/A	1661	N/A	N/A	N/A	N/A	N/A	N/A	N	N	N	N	N/A	N/A	N/A	N/A	N/A	N/A	N/A	N/A	N/A	N/A	N/A	N/A	N/A	N/A	N/A	N/A	N/A	Y	N/A	N/A
N/A	N/A	N/A	PICST_29465	N/A	1662	N/A	N/A	N/A	N/A	N/A	N/A	Y	N	Y	N	N/A	N/A	N/A	N/A	N/A	N/A	N/A	N/A	N/A	N/A	N/A	N/A	N/A	N/A	N/A	N/A	N/A	N	N/A	N/A
N/A	N/A	N/A	PICST_29467	N/A	1663	N/A	N/A	N/A	N/A	N/A	N/A	N	N	N	N	N/A	N/A	N/A	N/A	N/A	N/A	N/A	N/A	N/A	N/A	N/A	N/A	N/A	N/A	N/A	N/A	N/A	N	N/A	N/A
N/A	N/A	N/A	PICST_29483	N/A	1664	N/A	N/A	N/A	N/A	N/A	N/A	N	N	N	N	N/A	N/A	N/A	N/A	N/A	N/A	N/A	N/A	N/A	N/A	N/A	N/A	N/A	N/A	N/A	N/A	N/A	N	N/A	N/A
N/A	N/A	N/A	PICST_29486	N/A	1665	N/A	N/A	N/A	N/A	N/A	N/A	Y	Y	Y	N	N/A	N/A	N/A	N/A	N/A	N/A	N/A	N/A	N/A	N/A	N/A	N/A	N/A	N/A	N/A	N/A	N/A	N	N/A	N/A
N/A	N/A	N/A	PICST_29570	N/A	1666	N/A	N/A	N/A	N/A	N/A	N/A	Y	N	Y	N	N/A	N/A	N/A	N/A	N/A	N/A	N/A	N/A	N/A	N/A	N/A	N/A	N/A	N/A	N/A	N/A	N/A	N	N/A	N/A
N/A	N/A	N/A	PICST_29591	N/A	1667	N/A	N/A	N/A	N/A	N/A	N/A	Y	N	Y	N	N/A	N/A	N/A	N/A	N/A	N/A	N/A	N/A	N/A	N/A	N/A	N/A	N/A	N/A	N/A	N/A	N/A	N	N/A	N/A
N/A	N/A	N/A	PICST_29596	N/A	1668	N/A	N/A	N/A	N/A	N/A	N/A	N	N	N	N	N/A	N/A	N/A	N/A	N/A	N/A	N/A	N/A	N/A	N/A	N/A	N/A	N/A	N/A	N/A	N/A	N/A	N	N/A	N/A
N/A	N/A	N/A	PICST_29627	N/A	1669	N/A	N/A	N/A	N/A	N/A	N/A	N	N	N	N	N/A	N/A	N/A	N/A	N/A	N/A	N/A	N/A	N/A	N/A	N/A	N/A	N/A	N/A	N/A	N/A	N/A	Y	N/A	N/A
N/A	N/A	N/A	PICST_29635	N/A	1670	N/A	N/A	N/A	N/A	N/A	N/A	N	N	N	N	N/A	N/A	N/A	N/A	N/A	N/A	N/A	N/A	N/A	N/A	N/A	N/A	N/A	N/A	N/A	N/A	N/A	Y	N/A	N/A
N/A	N/A	N/A	PICST_29640	N/A	1671	N/A	N/A	N/A	N/A	N/A	N/A	N	N	N	N	N/A	N/A	N/A	N/A	N/A	N/A	N/A	N/A	N/A	N/A	N/A	N/A	N/A	N/A	N/A	N/A	N/A	N	N/A	N/A
N/A	N/A	N/A	PICST_29646	N/A	1672	N/A	N/A	N/A	N/A	N/A	N/A	Y	N	Y	N	N/A	N/A	N/A	N/A	N/A	N/A	N/A	N/A	N/A	N/A	N/A	N/A	N/A	N/A	N/A	N/A	N/A	Y	N/A	N/A
N/A	N/A	N/A	PICST_29665	N/A	1673	N/A	N/A	N/A	N/A	N/A	N/A	N	N	N	N	N/A	N/A	N/A	N/A	N/A	N/A	N/A	N/A	N/A	N/A	N/A	N/A	N/A	N/A	N/A	N/A	N/A	N	N/A	N/A
N/A	N/A	N/A	PICST_29666	N/A	1674	N/A	N/A	N/A	N/A	N/A	N/A	N	N	N	N	N/A	N/A	N/A	N/A	N/A	N/A	N/A	N/A	N/A	N/A	N/A	N/A	N/A	N/A	N/A	N/A	N/A	N	N/A	N/A
N/A	N/A	N/A	PICST_29686	N/A	1675	N/A	N/A	N/A	N/A	N/A	N/A	N	N	N	N	N/A	N/A	N/A	N/A	N/A	N/A	N/A	N/A	N/A	N/A	N/A	N/A	N/A	N/A	N/A	N/A	N/A	N	N/A	N/A
N/A	N/A	N/A	PICST_29704	N/A	1676	N/A	N/A	N/A	N/A	N/A	N/A	N	N	N	N	N/A	N/A	N/A	N/A	N/A	N/A	N/A	N/A	N/A	N/A	N/A	N/A	N/A	N/A	N/A	N/A	N/A	Y	N/A	N/A
N/A	N/A	N/A	PICST_29712	N/A	1677	N/A	N/A	N/A	N/A	N/A	N/A	Y	Y	Y	N	N/A	N/A	N/A	N/A	N/A	N/A	N/A	N/A	N/A	N/A	N/A	N/A	N/A	N/A	N/A	N/A	N/A	N	N/A	N/A
N/A	N/A	N/A	PICST_29713	N/A	1678	N/A	N/A	N/A	N/A	N/A	N/A	Y	N	Y	N	N/A	N/A	N/A	N/A	N/A	N/A	N/A	N/A	N/A	N/A	N/A	N/A	N/A	N/A	N/A	N/A	N/A	Y	N/A	N/A
N/A	N/A	N/A	PICST_29736	N/A	1679	N/A	N/A	N/A	N/A	N/A	N/A	Y	N	Y	N	N/A	N/A	N/A	N/A	N/A	N/A	N/A	N/A	N/A	N/A	N/A	N/A	N/A	N/A	N/A	N/A	N/A	Y	N/A	N/A
N/A	N/A	N/A	PICST_29755	N/A	1680	N/A	N/A	N/A	N/A	N/A	N/A	Y	N	Y	N	N/A	N/A	N/A	N/A	N/A	N/A	N/A	N/A	N/A	N/A	N/A	N/A	N/A	N/A	N/A	N/A	N/A	Y	N/A	N/A
N/A	N/A	N/A	PICST_29797	N/A	1681	N/A	N/A	N/A	N/A	N/A	N/A	Y	Y	Y	N	N/A	N/A	N/A	N/A	N/A	N/A	N/A	N/A	N/A	N/A	N/A	N/A	N/A	N/A	N/A	N/A	N/A	Y	N/A	N/A
N/A	N/A	N/A	PICST_29806	N/A	1682	N/A	N/A	N/A	N/A	N/A	N/A	Y	N	Y	N	N/A	N/A	N/A	N/A	N/A	N/A	N/A	N/A	N/A	N/A	N/A	N/A	N/A	N/A	N/A	N/A	N/A	Y	N/A	N/A
N/A	N/A	N/A	PICST_29817	N/A	1683	N/A	N/A	N/A	N/A	N/A	N/A	Y	Y	Y	N	N/A	N/A	N/A	N/A	N/A	N/A	N/A	N/A	N/A	N/A	N/A	N/A	N/A	N/A	N/A	N/A	N/A	Y	N/A	N/A
N/A	N/A	N/A	PICST_29818	N/A	1684	N/A	N/A	N/A	N/A	N/A	N/A	Y	N	Y	N	N/A	N/A	N/A	N/A	N/A	N/A	N/A	N/A	N/A	N/A	N/A	N/A	N/A	N/A	N/A	N/A	N/A	Y	N/A	N/A
N/A	N/A	N/A	PICST_29819	N/A	1685	N/A	N/A	N/A	N/A	N/A	N/A	N	N	N	N	N/A	N/A	N/A	N/A	N/A	N/A	N/A	N/A	N/A	N/A	N/A	N/A	N/A	N/A	N/A	N/A	N/A	N	N/A	N/A
N/A	N/A	N/A	PICST_29827	N/A	1686	N/A	N/A	N/A	N/A	N/A	N/A	N	N	N	N	N/A	N/A	N/A	N/A	N/A	N/A	N/A	N/A	N/A	N/A	N/A	N/A	N/A	N/A	N/A	N/A	N/A	N	N/A	N/A
N/A	N/A	N/A	PICST_29882	N/A	1687	N/A	N/A	N/A	N/A	N/A	N/A	N	N	N	N	N/A	N/A	N/A	N/A	N/A	N/A	N/A	N/A	N/A	N/A	N/A	N/A	N/A	N/A	N/A	N/A	N/A	N	N/A	N/A
N/A	N/A	N/A	PICST_29917	N/A	1688	N/A	N/A	N/A	N/A	N/A	N/A	Y	N	Y	N	N/A	N/A	N/A	N/A	N/A	N/A	N/A	N/A	N/A	N/A	N/A	N/A	N/A	N/A	N/A	N/A	N/A	Y	N/A	N/A
N/A	N/A	N/A	PICST_29945	N/A	1689	N/A	N/A	N/A	N/A	N/A	N/A	Y	N	Y	N	N/A	N/A	N/A	N/A	N/A	N/A	N/A	N/A	N/A	N/A	N/A	N/A	N/A	N/A	N/A	N/A	N/A	Y	N/A	N/A
N/A	N/A	N/A	PICST_29954	N/A	1690	N/A	N/A	N/A	N/A	N/A	N/A	Y	N	Y	N	N/A	N/A	N/A	N/A	N/A	N/A	N/A	N/A	N/A	N/A	N/A	N/A	N/A	N/A	N/A	N/A	N/A	N	N/A	N/A
N/A	N/A	N/A	PICST_29964	N/A	1691	N/A	N/A	N/A	N/A	N/A	N/A	N	N	N	N	N/A	N/A	N/A	N/A	N/A	N/A	N/A	N/A	N/A	N/A	N/A	N/A	N/A	N/A	N/A	N/A	N/A	N	N/A	N/A
N/A	N/A	N/A	PICST_29969	N/A	1692	N/A	N/A	N/A	N/A	N/A	N/A	N	N	N	N	N/A	N/A	N/A	N/A	N/A	N/A	N/A	N/A	N/A	N/A	N/A	N/A	N/A	N/A	N/A	N/A	N/A	N	N/A	N/A
N/A	N/A	N/A	PICST_29977	N/A	1693	N/A	N/A	N/A	N/A	N/A	N/A	N	N	N	N	N/A	N/A	N/A	N/A	N/A	N/A	N/A	N/A	N/A	N/A	N/A	N/A	N/A	N/A	N/A	N/A	N/A	Y	N/A	N/A
N/A	N/A	N/A	PICST_29983	N/A	1694	N/A	N/A	N/A	N/A	N/A	N/A	Y	Y	Y	N	N/A	N/A	N/A	N/A	N/A	N/A	N/A	N/A	N/A	N/A	N/A	N/A	N/A	N/A	N/A	N/A	N/A	Y	N/A	N/A
N/A	N/A	N/A	PICST_30010	N/A	1695	N/A	N/A	N/A	N/A	N/A	N/A	N	N	N	N	N/A	N/A	N/A	N/A	N/A	N/A	N/A	N/A	N/A	N/A	N/A	N/A	N/A	N/A	N/A	N/A	N/A	Y	N/A	N/A
N/A	N/A	N/A	PICST_30028	N/A	1696	N/A	N/A	N/A	N/A	N/A	N/A	N	N	N	N	N/A	N/A	N/A	N/A	N/A	N/A	N/A	N/A	N/A	N/A	N/A	N/A	N/A	N/A	N/A	N/A	N/A	N	N/A	N/A
N/A	N/A	N/A	PICST_30030	N/A	1697	N/A	N/A	N/A	N/A	N/A	N/A	N	N	N	N	N/A	N/A	N/A	N/A	N/A	N/A	N/A	N/A	N/A	N/A	N/A	N/A	N/A	N/A	N/A	N/A	N/A	N	N/A	N/A
N/A	N/A	N/A	PICST_30035	N/A	1698	N/A	N/A	N/A	N/A	N/A	N/A	N	N	N	N	N/A	N/A	N/A	N/A	N/A	N/A	N/A	N/A	N/A	N/A	N/A	N/A	N/A	N/A	N/A	N/A	N/A	Y	N/A	N/A
N/A	N/A	N/A	PICST_30036	N/A	1699	N/A	N/A	N/A	N/A	N/A	N/A	N	N	N	N	N/A	N/A	N/A	N/A	N/A	N/A	N/A	N/A	N/A	N/A	N/A	N/A	N/A	N/A	N/A	N/A	N/A	Y	N/A	N/A
N/A	N/A	N/A	PICST_30070	N/A	1700	N/A	N/A	N/A	N/A	N/A	N/A	Y	Y	Y	N	N/A	N/A	N/A	N/A	N/A	N/A	N/A	N/A	N/A	N/A	N/A	N/A	N/A	N/A	N/A	N/A	N/A	Y	N/A	N/A
N/A	N/A	N/A	PICST_30072	N/A	1701	N/A	N/A	N/A	N/A	N/A	N/A	N	N	N	N	N/A	N/A	N/A	N/A	N/A	N/A	N/A	N/A	N/A	N/A	N/A	N/A	N/A	N/A	N/A	N/A	N/A	N	N/A	N/A
N/A	N/A	N/A	PICST_30108	N/A	1702	N/A	N/A	N/A	N/A	N/A	N/A	N	N	N	N	N/A	N/A	N/A	N/A	N/A	N/A	N/A	N/A	N/A	N/A	N/A	N/A	N/A	N/A	N/A	N/A	N/A	Y	N/A	N/A
N/A	N/A	N/A	PICST_30119	N/A	1703	N/A	N/A	N/A	N/A	N/A	N/A	N	N	N	N	N/A	N/A	N/A	N/A	N/A	N/A	N/A	N/A	N/A	N/A	N/A	N/A	N/A	N/A	N/A	N/A	N/A	N	N/A	N/A
N/A	N/A	N/A	PICST_30164	N/A	1704	N/A	N/A	N/A	N/A	N/A	N/A	Y	Y	Y	N	N/A	N/A	N/A	N/A	N/A	N/A	N/A	N/A	N/A	N/A	N/A	N/A	N/A	N/A	N/A	N/A	N/A	Y	N/A	N/A
N/A	N/A	N/A	PICST_30179	N/A	1705	N/A	N/A	N/A	N/A	N/A	N/A	N	N	N	N	N/A	N/A	N/A	N/A	N/A	N/A	N/A	N/A	N/A	N/A	N/A	N/A	N/A	N/A	N/A	N/A	N/A	Y	N/A	N/A
N/A	N/A	N/A	PICST_30187	N/A	1706	N/A	N/A	N/A	N/A	N/A	N/A	N	N	N	N	N/A	N/A	N/A	N/A	N/A	N/A	N/A	N/A	N/A	N/A	N/A	N/A	N/A	N/A	N/A	N/A	N/A	N	N/A	N/A
N/A	N/A	N/A	PICST_30188	N/A	1707	N/A	N/A	N/A	N/A	N/A	N/A	N	N	N	N	N/A	N/A	N/A	N/A	N/A	N/A	N/A	N/A	N/A	N/A	N/A	N/A	N/A	N/A	N/A	N/A	N/A	N	N/A	N/A
N/A	N/A	N/A	PICST_30195	N/A	1708	N/A	N/A	N/A	N/A	N/A	N/A	Y	N	Y	N	N/A	N/A	N/A	N/A	N/A	N/A	N/A	N/A	N/A	N/A	N/A	N/A	N/A	N/A	N/A	N/A	N/A	Y	N/A	N/A
N/A	N/A	N/A	PICST_30203	N/A	1709	N/A	N/A	N/A	N/A	N/A	N/A	Y	N	Y	N	N/A	N/A	N/A	N/A	N/A	N/A	N/A	N/A	N/A	N/A	N/A	N/A	N/A	N/A	N/A	N/A	N/A	Y	N/A	N/A
N/A	N/A	N/A	PICST_30214	N/A	1710	N/A	N/A	N/A	N/A	N/A	N/A	Y	Y	Y	N	N/A	N/A	N/A	N/A	N/A	N/A	N/A	N/A	N/A	N/A	N/A	N/A	N/A	N/A	N/A	N/A	N/A	Y	N/A	N/A
N/A	N/A	N/A	PICST_30308	N/A	1711	N/A	N/A	N/A	N/A	N/A	N/A	Y	N	Y	N	N/A	N/A	N/A	N/A	N/A	N/A	N/A	N/A	N/A	N/A	N/A	N/A	N/A	N/A	N/A	N/A	N/A	N	N/A	N/A
N/A	N/A	N/A	PICST_30338	N/A	1712	N/A	N/A	N/A	N/A	N/A	N/A	N	N	N	N	N/A	N/A	N/A	N/A	N/A	N/A	N/A	N/A	N/A	N/A	N/A	N/A	N/A	N/A	N/A	N/A	N/A	Y	N/A	N/A
N/A	N/A	N/A	PICST_30342	N/A	1713	N/A	N/A	N/A	N/A	N/A	N/A	N	N	N	N	N/A	N/A	N/A	N/A	N/A	N/A	N/A	N/A	N/A	N/A	N/A	N/A	N/A	N/A	N/A	N/A	N/A	N	N/A	N/A
N/A	N/A	N/A	PICST_30411	N/A	1714	N/A	N/A	N/A	N/A	N/A	N/A	Y	N	Y	N	N/A	N/A	N/A	N/A	N/A	N/A	N/A	N/A	N/A	N/A	N/A	N/A	N/A	N/A	N/A	N/A	N/A	Y	N/A	N/A
N/A	N/A	N/A	PICST_30412	N/A	1715	N/A	N/A	N/A	N/A	N/A	N/A	Y	N	Y	N	N/A	N/A	N/A	N/A	N/A	N/A	N/A	N/A	N/A	N/A	N/A	N/A	N/A	N/A	N/A	N/A	N/A	Y	N/A	N/A
N/A	N/A	N/A	PICST_30440	N/A	1716	N/A	N/A	N/A	N/A	N/A	N/A	Y	N	Y	N	N/A	N/A	N/A	N/A	N/A	N/A	N/A	N/A	N/A	N/A	N/A	N/A	N/A	N/A	N/A	N/A	N/A	N	N/A	N/A
N/A	N/A	N/A	PICST_30480	N/A	1717	N/A	N/A	N/A	N/A	N/A	N/A	Y	N	Y	N	N/A	N/A	N/A	N/A	N/A	N/A	N/A	N/A	N/A	N/A	N/A	N/A	N/A	N/A	N/A	N/A	N/A	Y	N/A	N/A
N/A	N/A	N/A	PICST_30484	N/A	1718	N/A	N/A	N/A	N/A	N/A	N/A	Y	Y	Y	N	N/A	N/A	N/A	N/A	N/A	N/A	N/A	N/A	N/A	N/A	N/A	N/A	N/A	N/A	N/A	N/A	N/A	Y	N/A	N/A
N/A	N/A	N/A	PICST_30556	N/A	1719	N/A	N/A	N/A	N/A	N/A	N/A	N	N	N	N	N/A	N/A	N/A	N/A	N/A	N/A	N/A	N/A	N/A	N/A	N/A	N/A	N/A	N/A	N/A	N/A	N/A	N	N/A	N/A
N/A	N/A	N/A	PICST_30566	N/A	1720	N/A	N/A	N/A	N/A	N/A	N/A	Y	N	Y	N	N/A	N/A	N/A	N/A	N/A	N/A	N/A	N/A	N/A	N/A	N/A	N/A	N/A	N/A	N/A	N/A	N/A	Y	N/A	N/A
N/A	N/A	N/A	PICST_30643	N/A	1721	N/A	N/A	N/A	N/A	N/A	N/A	N	N	N	N	N/A	N/A	N/A	N/A	N/A	N/A	N/A	N/A	N/A	N/A	N/A	N/A	N/A	N/A	N/A	N/A	N/A	Y	N/A	N/A
N/A	N/A	N/A	PICST_30663	N/A	1722	N/A	N/A	N/A	N/A	N/A	N/A	Y	N	Y	N	N/A	N/A	N/A	N/A	N/A	N/A	N/A	N/A	N/A	N/A	N/A	N/A	N/A	N/A	N/A	N/A	N/A	Y	N/A	N/A
N/A	N/A	N/A	PICST_30682	N/A	1723	N/A	N/A	N/A	N/A	N/A	N/A	Y	N	Y	N	N/A	N/A	N/A	N/A	N/A	N/A	N/A	N/A	N/A	N/A	N/A	N/A	N/A	N/A	N/A	N/A	N/A	Y	N/A	N/A
N/A	N/A	N/A	PICST_30685	N/A	1724	N/A	N/A	N/A	N/A	N/A	N/A	N	N	N	N	N/A	N/A	N/A	N/A	N/A	N/A	N/A	N/A	N/A	N/A	N/A	N/A	N/A	N/A	N/A	N/A	N/A	N	N/A	N/A
N/A	N/A	N/A	PICST_30705	N/A	1725	N/A	N/A	N/A	N/A	N/A	N/A	Y	N	Y	N	N/A	N/A	N/A	N/A	N/A	N/A	N/A	N/A	N/A	N/A	N/A	N/A	N/A	N/A	N/A	N/A	N/A	Y	N/A	N/A
N/A	N/A	N/A	PICST_30756	N/A	1726	N/A	N/A	N/A	N/A	N/A	N/A	N	N	N	N	N/A	N/A	N/A	N/A	N/A	N/A	N/A	N/A	N/A	N/A	N/A	N/A	N/A	N/A	N/A	N/A	N/A	N	N/A	N/A
N/A	N/A	N/A	PICST_30764	N/A	1727	N/A	N/A	N/A	N/A	N/A	N/A	N	N	N	N	N/A	N/A	N/A	N/A	N/A	N/A	N/A	N/A	N/A	N/A	N/A	N/A	N/A	N/A	N/A	N/A	N/A	N	N/A	N/A
N/A	N/A	N/A	PICST_30765	N/A	1728	N/A	N/A	N/A	N/A	N/A	N/A	N	N	N	N	N/A	N/A	N/A	N/A	N/A	N/A	N/A	N/A	N/A	N/A	N/A	N/A	N/A	N/A	N/A	N/A	N/A	Y	N/A	N/A
N/A	N/A	N/A	PICST_30770	N/A	1729	N/A	N/A	N/A	N/A	N/A	N/A	Y	N	Y	N	N/A	N/A	N/A	N/A	N/A	N/A	N/A	N/A	N/A	N/A	N/A	N/A	N/A	N/A	N/A	N/A	N/A	Y	N/A	N/A
N/A	N/A	N/A	PICST_30771	N/A	1730	N/A	N/A	N/A	N/A	N/A	N/A	N	N	N	N	N/A	N/A	N/A	N/A	N/A	N/A	N/A	N/A	N/A	N/A	N/A	N/A	N/A	N/A	N/A	N/A	N/A	N	N/A	N/A
N/A	N/A	N/A	PICST_30813	N/A	1731	N/A	N/A	N/A	N/A	N/A	N/A	N	N	N	N	N/A	N/A	N/A	N/A	N/A	N/A	N/A	N/A	N/A	N/A	N/A	N/A	N/A	N/A	N/A	N/A	N/A	Y	N/A	N/A
N/A	N/A	N/A	PICST_30871	N/A	1732	N/A	N/A	N/A	N/A	N/A	N/A	Y	Y	Y	N	N/A	N/A	N/A	N/A	N/A	N/A	N/A	N/A	N/A	N/A	N/A	N/A	N/A	N/A	N/A	N/A	N/A	Y	N/A	N/A
N/A	N/A	N/A	PICST_30899	N/A	1733	N/A	N/A	N/A	N/A	N/A	N/A	Y	N	Y	N	N/A	N/A	N/A	N/A	N/A	N/A	N/A	N/A	N/A	N/A	N/A	N/A	N/A	N/A	N/A	N/A	N/A	Y	N/A	N/A
N/A	N/A	N/A	PICST_30900	N/A	1734	N/A	N/A	N/A	N/A	N/A	N/A	N	N	N	N	N/A	N/A	N/A	N/A	N/A	N/A	N/A	N/A	N/A	N/A	N/A	N/A	N/A	N/A	N/A	N/A	N/A	Y	N/A	N/A
N/A	N/A	N/A	PICST_30920	N/A	1735	N/A	N/A	N/A	N/A	N/A	N/A	N	N	N	N	N/A	N/A	N/A	N/A	N/A	N/A	N/A	N/A	N/A	N/A	N/A	N/A	N/A	N/A	N/A	N/A	N/A	Y	N/A	N/A
N/A	N/A	N/A	PICST_30948	N/A	1736	N/A	N/A	N/A	N/A	N/A	N/A	Y	N	Y	N	N/A	N/A	N/A	N/A	N/A	N/A	N/A	N/A	N/A	N/A	N/A	N/A	N/A	N/A	N/A	N/A	N/A	Y	N/A	N/A
N/A	N/A	N/A	PICST_30958	N/A	1737	N/A	N/A	N/A	N/A	N/A	N/A	Y	Y	Y	N	N/A	N/A	N/A	N/A	N/A	N/A	N/A	N/A	N/A	N/A	N/A	N/A	N/A	N/A	N/A	N/A	N/A	Y	N/A	N/A
N/A	N/A	N/A	PICST_30977	N/A	1738	N/A	N/A	N/A	N/A	N/A	N/A	N	N	N	N	N/A	N/A	N/A	N/A	N/A	N/A	N/A	N/A	N/A	N/A	N/A	N/A	N/A	N/A	N/A	N/A	N/A	Y	N/A	N/A
N/A	N/A	N/A	PICST_30978	N/A	1739	N/A	N/A	N/A	N/A	N/A	N/A	N	N	N	N	N/A	N/A	N/A	N/A	N/A	N/A	N/A	N/A	N/A	N/A	N/A	N/A	N/A	N/A	N/A	N/A	N/A	N	N/A	N/A
N/A	N/A	N/A	PICST_30979	N/A	1740	N/A	N/A	N/A	N/A	N/A	N/A	N	N	N	N	N/A	N/A	N/A	N/A	N/A	N/A	N/A	N/A	N/A	N/A	N/A	N/A	N/A	N/A	N/A	N/A	N/A	Y	N/A	N/A
N/A	N/A	N/A	PICST_30981	N/A	1741	N/A	N/A	N/A	N/A	N/A	N/A	N	N	N	N	N/A	N/A	N/A	N/A	N/A	N/A	N/A	N/A	N/A	N/A	N/A	N/A	N/A	N/A	N/A	N/A	N/A	Y	N/A	N/A
N/A	N/A	N/A	PICST_30986	N/A	1742	N/A	N/A	N/A	N/A	N/A	N/A	Y	Y	Y	N	N/A	N/A	N/A	N/A	N/A	N/A	N/A	N/A	N/A	N/A	N/A	N/A	N/A	N/A	N/A	N/A	N/A	Y	N/A	N/A
N/A	N/A	N/A	PICST_31009	N/A	1743	N/A	N/A	N/A	N/A	N/A	N/A	Y	N	Y	N	N/A	N/A	N/A	N/A	N/A	N/A	N/A	N/A	N/A	N/A	N/A	N/A	N/A	N/A	N/A	N/A	N/A	Y	N/A	N/A
N/A	N/A	N/A	PICST_31015	N/A	1744	N/A	N/A	N/A	N/A	N/A	N/A	N	N	N	N	N/A	N/A	N/A	N/A	N/A	N/A	N/A	N/A	N/A	N/A	N/A	N/A	N/A	N/A	N/A	N/A	N/A	Y	N/A	N/A
N/A	N/A	N/A	PICST_31024	N/A	1745	N/A	N/A	N/A	N/A	N/A	N/A	N	N	N	N	N/A	N/A	N/A	N/A	N/A	N/A	N/A	N/A	N/A	N/A	N/A	N/A	N/A	N/A	N/A	N/A	N/A	N	N/A	N/A
N/A	N/A	N/A	PICST_31025	N/A	1746	N/A	N/A	N/A	N/A	N/A	N/A	Y	N	Y	N	N/A	N/A	N/A	N/A	N/A	N/A	N/A	N/A	N/A	N/A	N/A	N/A	N/A	N/A	N/A	N/A	N/A	N	N/A	N/A
N/A	N/A	N/A	PICST_31032	N/A	1747	N/A	N/A	N/A	N/A	N/A	N/A	N	N	N	N	N/A	N/A	N/A	N/A	N/A	N/A	N/A	N/A	N/A	N/A	N/A	N/A	N/A	N/A	N/A	N/A	N/A	Y	N/A	N/A
N/A	N/A	N/A	PICST_31033	N/A	1748	N/A	N/A	N/A	N/A	N/A	N/A	N	N	N	N	N/A	N/A	N/A	N/A	N/A	N/A	N/A	N/A	N/A	N/A	N/A	N/A	N/A	N/A	N/A	N/A	N/A	Y	N/A	N/A
N/A	N/A	N/A	PICST_31034	N/A	1749	N/A	N/A	N/A	N/A	N/A	N/A	N	N	N	N	N/A	N/A	N/A	N/A	N/A	N/A	N/A	N/A	N/A	N/A	N/A	N/A	N/A	N/A	N/A	N/A	N/A	N	N/A	N/A
N/A	N/A	N/A	PICST_31037	N/A	1750	N/A	N/A	N/A	N/A	N/A	N/A	Y	N	Y	N	N/A	N/A	N/A	N/A	N/A	N/A	N/A	N/A	N/A	N/A	N/A	N/A	N/A	N/A	N/A	N/A	N/A	Y	N/A	N/A
N/A	N/A	N/A	PICST_31041	N/A	1751	N/A	N/A	N/A	N/A	N/A	N/A	Y	Y	Y	N	N/A	N/A	N/A	N/A	N/A	N/A	N/A	N/A	N/A	N/A	N/A	N/A	N/A	N/A	N/A	N/A	N/A	Y	N/A	N/A
N/A	N/A	N/A	PICST_31059	N/A	1752	N/A	N/A	N/A	N/A	N/A	N/A	Y	N	Y	N	N/A	N/A	N/A	N/A	N/A	N/A	N/A	N/A	N/A	N/A	N/A	N/A	N/A	N/A	N/A	N/A	N/A	N	N/A	N/A
N/A	N/A	N/A	PICST_31083	N/A	1753	N/A	N/A	N/A	N/A	N/A	N/A	Y	Y	N	N	N/A	N/A	N/A	N/A	N/A	N/A	N/A	N/A	N/A	N/A	N/A	N/A	N/A	N/A	N/A	N/A	N/A	N	N/A	N/A
N/A	N/A	N/A	PICST_31085	N/A	1754	N/A	N/A	N/A	N/A	N/A	N/A	N	N	N	N	N/A	N/A	N/A	N/A	N/A	N/A	N/A	N/A	N/A	N/A	N/A	N/A	N/A	N/A	N/A	N/A	N/A	N	N/A	N/A
N/A	N/A	N/A	PICST_31086	N/A	1755	N/A	N/A	N/A	N/A	N/A	N/A	Y	N	Y	N	N/A	N/A	N/A	N/A	N/A	N/A	N/A	N/A	N/A	N/A	N/A	N/A	N/A	N/A	N/A	N/A	N/A	Y	N/A	N/A
N/A	N/A	N/A	PICST_31093	N/A	1756	N/A	N/A	N/A	N/A	N/A	N/A	Y	N	Y	N	N/A	N/A	N/A	N/A	N/A	N/A	N/A	N/A	N/A	N/A	N/A	N/A	N/A	N/A	N/A	N/A	N/A	Y	N/A	N/A
N/A	N/A	N/A	PICST_31115	N/A	1757	N/A	N/A	N/A	N/A	N/A	N/A	N	N	N	N	N/A	N/A	N/A	N/A	N/A	N/A	N/A	N/A	N/A	N/A	N/A	N/A	N/A	N/A	N/A	N/A	N/A	N	N/A	N/A
N/A	N/A	N/A	PICST_31126	N/A	1758	N/A	N/A	N/A	N/A	N/A	N/A	N	N	N	N	N/A	N/A	N/A	N/A	N/A	N/A	N/A	N/A	N/A	N/A	N/A	N/A	N/A	N/A	N/A	N/A	N/A	N	N/A	N/A
N/A	N/A	N/A	PICST_31127	N/A	1759	N/A	N/A	N/A	N/A	N/A	N/A	N	N	N	N	N/A	N/A	N/A	N/A	N/A	N/A	N/A	N/A	N/A	N/A	N/A	N/A	N/A	N/A	N/A	N/A	N/A	N	N/A	N/A
N/A	N/A	N/A	PICST_31128	N/A	1760	N/A	N/A	N/A	N/A	N/A	N/A	N	N	N	N	N/A	N/A	N/A	N/A	N/A	N/A	N/A	N/A	N/A	N/A	N/A	N/A	N/A	N/A	N/A	N/A	N/A	Y	N/A	N/A
N/A	N/A	N/A	PICST_31130	N/A	1761	N/A	N/A	N/A	N/A	N/A	N/A	Y	Y	Y	N	N/A	N/A	N/A	N/A	N/A	N/A	N/A	N/A	N/A	N/A	N/A	N/A	N/A	N/A	N/A	N/A	N/A	N	N/A	N/A
N/A	N/A	N/A	PICST_31131	N/A	1762	N/A	N/A	N/A	N/A	N/A	N/A	N	N	N	N	N/A	N/A	N/A	N/A	N/A	N/A	N/A	N/A	N/A	N/A	N/A	N/A	N/A	N/A	N/A	N/A	N/A	Y	N/A	N/A
N/A	N/A	N/A	PICST_31132	N/A	1763	N/A	N/A	N/A	N/A	N/A	N/A	N	N	N	N	N/A	N/A	N/A	N/A	N/A	N/A	N/A	N/A	N/A	N/A	N/A	N/A	N/A	N/A	N/A	N/A	N/A	Y	N/A	N/A
N/A	N/A	N/A	PICST_31135	N/A	1764	N/A	N/A	N/A	N/A	N/A	N/A	N	N	N	N	N/A	N/A	N/A	N/A	N/A	N/A	N/A	N/A	N/A	N/A	N/A	N/A	N/A	N/A	N/A	N/A	N/A	Y	N/A	N/A
N/A	N/A	N/A	PICST_31157	N/A	1765	N/A	N/A	N/A	N/A	N/A	N/A	Y	N	Y	N	N/A	N/A	N/A	N/A	N/A	N/A	N/A	N/A	N/A	N/A	N/A	N/A	N/A	N/A	N/A	N/A	N/A	N	N/A	N/A
N/A	N/A	N/A	PICST_31173	N/A	1766	N/A	N/A	N/A	N/A	N/A	N/A	Y	N	Y	N	N/A	N/A	N/A	N/A	N/A	N/A	N/A	N/A	N/A	N/A	N/A	N/A	N/A	N/A	N/A	N/A	N/A	Y	N/A	N/A
N/A	N/A	N/A	PICST_31183	N/A	1767	N/A	N/A	N/A	N/A	N/A	N/A	Y	N	Y	N	N/A	N/A	N/A	N/A	N/A	N/A	N/A	N/A	N/A	N/A	N/A	N/A	N/A	N/A	N/A	N/A	N/A	N	N/A	N/A
N/A	N/A	N/A	PICST_31226	N/A	1768	N/A	N/A	N/A	N/A	N/A	N/A	Y	Y	Y	N	N/A	N/A	N/A	N/A	N/A	N/A	N/A	N/A	N/A	N/A	N/A	N/A	N/A	N/A	N/A	N/A	N/A	Y	N/A	N/A
N/A	N/A	N/A	PICST_31232	N/A	1769	N/A	N/A	N/A	N/A	N/A	N/A	Y	Y	Y	N	N/A	N/A	N/A	N/A	N/A	N/A	N/A	N/A	N/A	N/A	N/A	N/A	N/A	N/A	N/A	N/A	N/A	N	N/A	N/A
N/A	N/A	N/A	PICST_31237	N/A	1770	N/A	N/A	N/A	N/A	N/A	N/A	Y	N	Y	N	N/A	N/A	N/A	N/A	N/A	N/A	N/A	N/A	N/A	N/A	N/A	N/A	N/A	N/A	N/A	N/A	N/A	Y	N/A	N/A
N/A	N/A	N/A	PICST_31239	N/A	1771	N/A	N/A	N/A	N/A	N/A	N/A	Y	Y	Y	N	N/A	N/A	N/A	N/A	N/A	N/A	N/A	N/A	N/A	N/A	N/A	N/A	N/A	N/A	N/A	N/A	N/A	Y	N/A	N/A
N/A	N/A	N/A	PICST_31253	N/A	1772	N/A	N/A	N/A	N/A	N/A	N/A	N	N	N	N	N/A	N/A	N/A	N/A	N/A	N/A	N/A	N/A	N/A	N/A	N/A	N/A	N/A	N/A	N/A	N/A	N/A	Y	N/A	N/A
N/A	N/A	N/A	PICST_31316	N/A	1773	N/A	N/A	N/A	N/A	N/A	N/A	Y	N	Y	N	N/A	N/A	N/A	N/A	N/A	N/A	N/A	N/A	N/A	N/A	N/A	N/A	N/A	N/A	N/A	N/A	N/A	Y	N/A	N/A
N/A	N/A	N/A	PICST_31331	N/A	1774	N/A	N/A	N/A	N/A	N/A	N/A	N	N	N	N	N/A	N/A	N/A	N/A	N/A	N/A	N/A	N/A	N/A	N/A	N/A	N/A	N/A	N/A	N/A	N/A	N/A	N	N/A	N/A
N/A	N/A	N/A	PICST_31353	N/A	1775	N/A	N/A	N/A	N/A	N/A	N/A	Y	N	Y	N	N/A	N/A	N/A	N/A	N/A	N/A	N/A	N/A	N/A	N/A	N/A	N/A	N/A	N/A	N/A	N/A	N/A	N	N/A	N/A
N/A	N/A	N/A	PICST_31412	N/A	1776	N/A	N/A	N/A	N/A	N/A	N/A	N	N	N	N	N/A	N/A	N/A	N/A	N/A	N/A	N/A	N/A	N/A	N/A	N/A	N/A	N/A	N/A	N/A	N/A	N/A	N	N/A	N/A
N/A	N/A	N/A	PICST_31430	N/A	1777	N/A	N/A	N/A	N/A	N/A	N/A	Y	N	Y	N	N/A	N/A	N/A	N/A	N/A	N/A	N/A	N/A	N/A	N/A	N/A	N/A	N/A	N/A	N/A	N/A	N/A	Y	N/A	N/A
N/A	N/A	N/A	PICST_31442	N/A	1778	N/A	N/A	N/A	N/A	N/A	N/A	N	N	N	N	N/A	N/A	N/A	N/A	N/A	N/A	N/A	N/A	N/A	N/A	N/A	N/A	N/A	N/A	N/A	N/A	N/A	Y	N/A	N/A
N/A	N/A	N/A	PICST_31458	N/A	1779	N/A	N/A	N/A	N/A	N/A	N/A	N	N	N	N	N/A	N/A	N/A	N/A	N/A	N/A	N/A	N/A	N/A	N/A	N/A	N/A	N/A	N/A	N/A	N/A	N/A	N	N/A	N/A
N/A	N/A	N/A	PICST_31485	N/A	1780	N/A	N/A	N/A	N/A	N/A	N/A	Y	N	Y	N	N/A	N/A	N/A	N/A	N/A	N/A	N/A	N/A	N/A	N/A	N/A	N/A	N/A	N/A	N/A	N/A	N/A	Y	N/A	N/A
N/A	N/A	N/A	PICST_31498	N/A	1781	N/A	N/A	N/A	N/A	N/A	N/A	N	N	N	N	N/A	N/A	N/A	N/A	N/A	N/A	N/A	N/A	N/A	N/A	N/A	N/A	N/A	N/A	N/A	N/A	N/A	Y	N/A	N/A
N/A	N/A	N/A	PICST_31515	N/A	1782	N/A	N/A	N/A	N/A	N/A	N/A	Y	N	Y	N	N/A	N/A	N/A	N/A	N/A	N/A	N/A	N/A	N/A	N/A	N/A	N/A	N/A	N/A	N/A	N/A	N/A	Y	N/A	N/A
N/A	N/A	N/A	PICST_31520	N/A	1783	N/A	N/A	N/A	N/A	N/A	N/A	Y	Y	Y	N	N/A	N/A	N/A	N/A	N/A	N/A	N/A	N/A	N/A	N/A	N/A	N/A	N/A	N/A	N/A	N/A	N/A	Y	N/A	N/A
N/A	N/A	N/A	PICST_31529	N/A	1784	N/A	N/A	N/A	N/A	N/A	N/A	Y	N	Y	N	N/A	N/A	N/A	N/A	N/A	N/A	N/A	N/A	N/A	N/A	N/A	N/A	N/A	N/A	N/A	N/A	N/A	Y	N/A	N/A
N/A	N/A	N/A	PICST_31542	N/A	1785	N/A	N/A	N/A	N/A	N/A	N/A	N	N	N	N	N/A	N/A	N/A	N/A	N/A	N/A	N/A	N/A	N/A	N/A	N/A	N/A	N/A	N/A	N/A	N/A	N/A	Y	N/A	N/A
N/A	N/A	N/A	PICST_31613	N/A	1786	N/A	N/A	N/A	N/A	N/A	N/A	Y	N	Y	N	N/A	N/A	N/A	N/A	N/A	N/A	N/A	N/A	N/A	N/A	N/A	N/A	N/A	N/A	N/A	N/A	N/A	Y	N/A	N/A
N/A	N/A	N/A	PICST_31629	N/A	1787	N/A	N/A	N/A	N/A	N/A	N/A	N	N	N	N	N/A	N/A	N/A	N/A	N/A	N/A	N/A	N/A	N/A	N/A	N/A	N/A	N/A	N/A	N/A	N/A	N/A	N	N/A	N/A
N/A	N/A	N/A	PICST_31634	N/A	1788	N/A	N/A	N/A	N/A	N/A	N/A	Y	N	Y	N	N/A	N/A	N/A	N/A	N/A	N/A	N/A	N/A	N/A	N/A	N/A	N/A	N/A	N/A	N/A	N/A	N/A	Y	N/A	N/A
N/A	N/A	N/A	PICST_31676	N/A	1789	N/A	N/A	N/A	N/A	N/A	N/A	Y	N	Y	N	N/A	N/A	N/A	N/A	N/A	N/A	N/A	N/A	N/A	N/A	N/A	N/A	N/A	N/A	N/A	N/A	N/A	Y	N/A	N/A
N/A	N/A	N/A	PICST_31695	N/A	1790	N/A	N/A	N/A	N/A	N/A	N/A	N	N	N	N	N/A	N/A	N/A	N/A	N/A	N/A	N/A	N/A	N/A	N/A	N/A	N/A	N/A	N/A	N/A	N/A	N/A	N	N/A	N/A
N/A	N/A	N/A	PICST_31696	N/A	1791	N/A	N/A	N/A	N/A	N/A	N/A	N	N	N	N	N/A	N/A	N/A	N/A	N/A	N/A	N/A	N/A	N/A	N/A	N/A	N/A	N/A	N/A	N/A	N/A	N/A	N	N/A	N/A
N/A	N/A	N/A	PICST_31744	N/A	1792	N/A	N/A	N/A	N/A	N/A	N/A	N	N	N	N	N/A	N/A	N/A	N/A	N/A	N/A	N/A	N/A	N/A	N/A	N/A	N/A	N/A	N/A	N/A	N/A	N/A	Y	N/A	N/A
N/A	N/A	N/A	PICST_31745	N/A	1793	N/A	N/A	N/A	N/A	N/A	N/A	N	N	N	N	N/A	N/A	N/A	N/A	N/A	N/A	N/A	N/A	N/A	N/A	N/A	N/A	N/A	N/A	N/A	N/A	N/A	N	N/A	N/A
N/A	N/A	N/A	PICST_31787	N/A	1794	N/A	N/A	N/A	N/A	N/A	N/A	Y	N	Y	N	N/A	N/A	N/A	N/A	N/A	N/A	N/A	N/A	N/A	N/A	N/A	N/A	N/A	N/A	N/A	N/A	N/A	Y	N/A	N/A
N/A	N/A	N/A	PICST_31809	N/A	1795	N/A	N/A	N/A	N/A	N/A	N/A	Y	N	Y	N	N/A	N/A	N/A	N/A	N/A	N/A	N/A	N/A	N/A	N/A	N/A	N/A	N/A	N/A	N/A	N/A	N/A	N	N/A	N/A
N/A	N/A	N/A	PICST_31825	N/A	1796	N/A	N/A	N/A	N/A	N/A	N/A	N	N	N	N	N/A	N/A	N/A	N/A	N/A	N/A	N/A	N/A	N/A	N/A	N/A	N/A	N/A	N/A	N/A	N/A	N/A	N	N/A	N/A
N/A	N/A	N/A	PICST_31830	N/A	1797	N/A	N/A	N/A	N/A	N/A	N/A	N	N	N	N	N/A	N/A	N/A	N/A	N/A	N/A	N/A	N/A	N/A	N/A	N/A	N/A	N/A	N/A	N/A	N/A	N/A	Y	N/A	N/A
N/A	N/A	N/A	PICST_31831	N/A	1798	N/A	N/A	N/A	N/A	N/A	N/A	N	N	N	N	N/A	N/A	N/A	N/A	N/A	N/A	N/A	N/A	N/A	N/A	N/A	N/A	N/A	N/A	N/A	N/A	N/A	Y	N/A	N/A
N/A	N/A	N/A	PICST_31835	N/A	1799	N/A	N/A	N/A	N/A	N/A	N/A	N	N	N	N	N/A	N/A	N/A	N/A	N/A	N/A	N/A	N/A	N/A	N/A	N/A	N/A	N/A	N/A	N/A	N/A	N/A	Y	N/A	N/A
N/A	N/A	N/A	PICST_31838	N/A	1800	N/A	N/A	N/A	N/A	N/A	N/A	Y	N	Y	N	N/A	N/A	N/A	N/A	N/A	N/A	N/A	N/A	N/A	N/A	N/A	N/A	N/A	N/A	N/A	N/A	N/A	Y	N/A	N/A
N/A	N/A	N/A	PICST_31875	N/A	1801	N/A	N/A	N/A	N/A	N/A	N/A	N	N	N	N	N/A	N/A	N/A	N/A	N/A	N/A	N/A	N/A	N/A	N/A	N/A	N/A	N/A	N/A	N/A	N/A	N/A	N	N/A	N/A
N/A	N/A	N/A	PICST_31956	N/A	1802	N/A	N/A	N/A	N/A	N/A	N/A	N	N	N	N	N/A	N/A	N/A	N/A	N/A	N/A	N/A	N/A	N/A	N/A	N/A	N/A	N/A	N/A	N/A	N/A	N/A	N	N/A	N/A
N/A	N/A	N/A	PICST_31958	N/A	1803	N/A	N/A	N/A	N/A	N/A	N/A	N	N	N	N	N/A	N/A	N/A	N/A	N/A	N/A	N/A	N/A	N/A	N/A	N/A	N/A	N/A	N/A	N/A	N/A	N/A	Y	N/A	N/A
N/A	N/A	N/A	PICST_31966	N/A	1804	N/A	N/A	N/A	N/A	N/A	N/A	N	N	N	N	N/A	N/A	N/A	N/A	N/A	N/A	N/A	N/A	N/A	N/A	N/A	N/A	N/A	N/A	N/A	N/A	N/A	N	N/A	N/A
N/A	N/A	N/A	PICST_31980	N/A	1805	N/A	N/A	N/A	N/A	N/A	N/A	Y	N	Y	N	N/A	N/A	N/A	N/A	N/A	N/A	N/A	N/A	N/A	N/A	N/A	N/A	N/A	N/A	N/A	N/A	N/A	Y	N/A	N/A
N/A	N/A	N/A	PICST_32027	N/A	1806	N/A	N/A	N/A	N/A	N/A	N/A	N	N	N	N	N/A	N/A	N/A	N/A	N/A	N/A	N/A	N/A	N/A	N/A	N/A	N/A	N/A	N/A	N/A	N/A	N/A	Y	N/A	N/A
N/A	N/A	N/A	PICST_32028	N/A	1807	N/A	N/A	N/A	N/A	N/A	N/A	N	N	N	N	N/A	N/A	N/A	N/A	N/A	N/A	N/A	N/A	N/A	N/A	N/A	N/A	N/A	N/A	N/A	N/A	N/A	Y	N/A	N/A
N/A	N/A	N/A	PICST_32085	N/A	1808	N/A	N/A	N/A	N/A	N/A	N/A	N	N	N	N	N/A	N/A	N/A	N/A	N/A	N/A	N/A	N/A	N/A	N/A	N/A	N/A	N/A	N/A	N/A	N/A	N/A	N	N/A	N/A
N/A	N/A	N/A	PICST_32086	N/A	1809	N/A	N/A	N/A	N/A	N/A	N/A	N	N	N	N	N/A	N/A	N/A	N/A	N/A	N/A	N/A	N/A	N/A	N/A	N/A	N/A	N/A	N/A	N/A	N/A	N/A	N	N/A	N/A
N/A	N/A	N/A	PICST_32113	N/A	1810	N/A	N/A	N/A	N/A	N/A	N/A	Y	Y	Y	N	N/A	N/A	N/A	N/A	N/A	N/A	N/A	N/A	N/A	N/A	N/A	N/A	N/A	N/A	N/A	N/A	N/A	Y	N/A	N/A
N/A	N/A	N/A	PICST_32114	N/A	1811	N/A	N/A	N/A	N/A	N/A	N/A	Y	Y	Y	N	N/A	N/A	N/A	N/A	N/A	N/A	N/A	N/A	N/A	N/A	N/A	N/A	N/A	N/A	N/A	N/A	N/A	Y	N/A	N/A
N/A	N/A	N/A	PICST_32122	N/A	1812	N/A	N/A	N/A	N/A	N/A	N/A	Y	N	Y	N	N/A	N/A	N/A	N/A	N/A	N/A	N/A	N/A	N/A	N/A	N/A	N/A	N/A	N/A	N/A	N/A	N/A	Y	N/A	N/A
N/A	N/A	N/A	PICST_32142	N/A	1813	N/A	N/A	N/A	N/A	N/A	N/A	N	N	N	N	N/A	N/A	N/A	N/A	N/A	N/A	N/A	N/A	N/A	N/A	N/A	N/A	N/A	N/A	N/A	N/A	N/A	N	N/A	N/A
N/A	N/A	N/A	PICST_32181	N/A	1814	N/A	N/A	N/A	N/A	N/A	N/A	Y	N	Y	N	N/A	N/A	N/A	N/A	N/A	N/A	N/A	N/A	N/A	N/A	N/A	N/A	N/A	N/A	N/A	N/A	N/A	N	N/A	N/A
N/A	N/A	N/A	PICST_32185	N/A	1815	N/A	N/A	N/A	N/A	N/A	N/A	Y	Y	Y	N	N/A	N/A	N/A	N/A	N/A	N/A	N/A	N/A	N/A	N/A	N/A	N/A	N/A	N/A	N/A	N/A	N/A	Y	N/A	N/A
N/A	N/A	N/A	PICST_32205	N/A	1816	N/A	N/A	N/A	N/A	N/A	N/A	N	N	N	N	N/A	N/A	N/A	N/A	N/A	N/A	N/A	N/A	N/A	N/A	N/A	N/A	N/A	N/A	N/A	N/A	N/A	Y	N/A	N/A
N/A	N/A	N/A	PICST_32212	N/A	1817	N/A	N/A	N/A	N/A	N/A	N/A	N	N	N	N	N/A	N/A	N/A	N/A	N/A	N/A	N/A	N/A	N/A	N/A	N/A	N/A	N/A	N/A	N/A	N/A	N/A	N	N/A	N/A
N/A	N/A	N/A	PICST_32218	N/A	1818	N/A	N/A	N/A	N/A	N/A	N/A	Y	N	Y	N	N/A	N/A	N/A	N/A	N/A	N/A	N/A	N/A	N/A	N/A	N/A	N/A	N/A	N/A	N/A	N/A	N/A	N	N/A	N/A
N/A	N/A	N/A	PICST_32251	N/A	1819	N/A	N/A	N/A	N/A	N/A	N/A	N	N	N	N	N/A	N/A	N/A	N/A	N/A	N/A	N/A	N/A	N/A	N/A	N/A	N/A	N/A	N/A	N/A	N/A	N/A	N	N/A	N/A
N/A	N/A	N/A	PICST_32265	N/A	1820	N/A	N/A	N/A	N/A	N/A	N/A	N	N	N	N	N/A	N/A	N/A	N/A	N/A	N/A	N/A	N/A	N/A	N/A	N/A	N/A	N/A	N/A	N/A	N/A	N/A	N	N/A	N/A
N/A	N/A	N/A	PICST_32277	N/A	1821	N/A	N/A	N/A	N/A	N/A	N/A	N	N	N	N	N/A	N/A	N/A	N/A	N/A	N/A	N/A	N/A	N/A	N/A	N/A	N/A	N/A	N/A	N/A	N/A	N/A	Y	N/A	N/A
N/A	N/A	N/A	PICST_32278	N/A	1822	N/A	N/A	N/A	N/A	N/A	N/A	N	N	N	N	N/A	N/A	N/A	N/A	N/A	N/A	N/A	N/A	N/A	N/A	N/A	N/A	N/A	N/A	N/A	N/A	N/A	Y	N/A	N/A
N/A	N/A	N/A	PICST_32285	N/A	1823	N/A	N/A	N/A	N/A	N/A	N/A	Y	Y	Y	N	N/A	N/A	N/A	N/A	N/A	N/A	N/A	N/A	N/A	N/A	N/A	N/A	N/A	N/A	N/A	N/A	N/A	Y	N/A	N/A
N/A	N/A	N/A	PICST_32359	N/A	1824	N/A	N/A	N/A	N/A	N/A	N/A	N	N	N	N	N/A	N/A	N/A	N/A	N/A	N/A	N/A	N/A	N/A	N/A	N/A	N/A	N/A	N/A	N/A	N/A	N/A	Y	N/A	N/A
N/A	N/A	N/A	PICST_32384	N/A	1825	N/A	N/A	N/A	N/A	N/A	N/A	Y	Y	Y	N	N/A	N/A	N/A	N/A	N/A	N/A	N/A	N/A	N/A	N/A	N/A	N/A	N/A	N/A	N/A	N/A	N/A	N	N/A	N/A
N/A	N/A	N/A	PICST_32401	N/A	1826	N/A	N/A	N/A	N/A	N/A	N/A	Y	N	Y	N	N/A	N/A	N/A	N/A	N/A	N/A	N/A	N/A	N/A	N/A	N/A	N/A	N/A	N/A	N/A	N/A	N/A	Y	N/A	N/A
N/A	N/A	N/A	PICST_32413	N/A	1827	N/A	N/A	N/A	N/A	N/A	N/A	N	N	N	N	N/A	N/A	N/A	N/A	N/A	N/A	N/A	N/A	N/A	N/A	N/A	N/A	N/A	N/A	N/A	N/A	N/A	Y	N/A	N/A
N/A	N/A	N/A	PICST_32443	N/A	1828	N/A	N/A	N/A	N/A	N/A	N/A	Y	N	Y	N	N/A	N/A	N/A	N/A	N/A	N/A	N/A	N/A	N/A	N/A	N/A	N/A	N/A	N/A	N/A	N/A	N/A	Y	N/A	N/A
N/A	N/A	N/A	PICST_32445	N/A	1829	N/A	N/A	N/A	N/A	N/A	N/A	N	N	N	N	N/A	N/A	N/A	N/A	N/A	N/A	N/A	N/A	N/A	N/A	N/A	N/A	N/A	N/A	N/A	N/A	N/A	Y	N/A	N/A
N/A	N/A	N/A	PICST_32448	N/A	1830	N/A	N/A	N/A	N/A	N/A	N/A	Y	Y	Y	N	N/A	N/A	N/A	N/A	N/A	N/A	N/A	N/A	N/A	N/A	N/A	N/A	N/A	N/A	N/A	N/A	N/A	Y	N/A	N/A
N/A	N/A	N/A	PICST_32467	N/A	1831	N/A	N/A	N/A	N/A	N/A	N/A	N	N	N	N	N/A	N/A	N/A	N/A	N/A	N/A	N/A	N/A	N/A	N/A	N/A	N/A	N/A	N/A	N/A	N/A	N/A	Y	N/A	N/A
N/A	N/A	N/A	PICST_32468	N/A	1832	N/A	N/A	N/A	N/A	N/A	N/A	N	N	N	N	N/A	N/A	N/A	N/A	N/A	N/A	N/A	N/A	N/A	N/A	N/A	N/A	N/A	N/A	N/A	N/A	N/A	Y	N/A	N/A
N/A	N/A	N/A	PICST_32517	N/A	1833	N/A	N/A	N/A	N/A	N/A	N/A	Y	N	Y	N	N/A	N/A	N/A	N/A	N/A	N/A	N/A	N/A	N/A	N/A	N/A	N/A	N/A	N/A	N/A	N/A	N/A	N	N/A	N/A
N/A	N/A	N/A	PICST_32520	N/A	1834	N/A	N/A	N/A	N/A	N/A	N/A	N	N	N	N	N/A	N/A	N/A	N/A	N/A	N/A	N/A	N/A	N/A	N/A	N/A	N/A	N/A	N/A	N/A	N/A	N/A	N	N/A	N/A
N/A	N/A	N/A	PICST_32530	N/A	1835	N/A	N/A	N/A	N/A	N/A	N/A	Y	N	Y	N	N/A	N/A	N/A	N/A	N/A	N/A	N/A	N/A	N/A	N/A	N/A	N/A	N/A	N/A	N/A	N/A	N/A	Y	N/A	N/A
N/A	N/A	N/A	PICST_32531	N/A	1836	N/A	N/A	N/A	N/A	N/A	N/A	Y	N	Y	N	N/A	N/A	N/A	N/A	N/A	N/A	N/A	N/A	N/A	N/A	N/A	N/A	N/A	N/A	N/A	N/A	N/A	Y	N/A	N/A
N/A	N/A	N/A	PICST_3255	N/A	1837	N/A	N/A	N/A	N/A	N/A	N/A	N	N	N	N	N/A	N/A	N/A	N/A	N/A	N/A	N/A	N/A	N/A	N/A	N/A	N/A	N/A	N/A	N/A	N/A	N/A	Y	N/A	N/A
N/A	N/A	N/A	PICST_32564	N/A	1838	N/A	N/A	N/A	N/A	N/A	N/A	N	N	N	N	N/A	N/A	N/A	N/A	N/A	N/A	N/A	N/A	N/A	N/A	N/A	N/A	N/A	N/A	N/A	N/A	N/A	Y	N/A	N/A
N/A	N/A	N/A	PICST_32571	N/A	1839	N/A	N/A	N/A	N/A	N/A	N/A	Y	N	Y	N	N/A	N/A	N/A	N/A	N/A	N/A	N/A	N/A	N/A	N/A	N/A	N/A	N/A	N/A	N/A	N/A	N/A	N	N/A	N/A
N/A	N/A	N/A	PICST_32587	N/A	1840	N/A	N/A	N/A	N/A	N/A	N/A	Y	Y	Y	N	N/A	N/A	N/A	N/A	N/A	N/A	N/A	N/A	N/A	N/A	N/A	N/A	N/A	N/A	N/A	N/A	N/A	Y	N/A	N/A
N/A	N/A	N/A	PICST_32593	N/A	1841	N/A	N/A	N/A	N/A	N/A	N/A	N	N	N	N	N/A	N/A	N/A	N/A	N/A	N/A	N/A	N/A	N/A	N/A	N/A	N/A	N/A	N/A	N/A	N/A	N/A	Y	N/A	N/A
N/A	N/A	N/A	PICST_32634	N/A	1842	N/A	N/A	N/A	N/A	N/A	N/A	N	N	N	N	N/A	N/A	N/A	N/A	N/A	N/A	N/A	N/A	N/A	N/A	N/A	N/A	N/A	N/A	N/A	N/A	N/A	Y	N/A	N/A
N/A	N/A	N/A	PICST_32737	N/A	1843	N/A	N/A	N/A	N/A	N/A	N/A	Y	N	Y	N	N/A	N/A	N/A	N/A	N/A	N/A	N/A	N/A	N/A	N/A	N/A	N/A	N/A	N/A	N/A	N/A	N/A	N	N/A	N/A
N/A	N/A	N/A	PICST_32751	N/A	1844	N/A	N/A	N/A	N/A	N/A	N/A	N	N	N	N	N/A	N/A	N/A	N/A	N/A	N/A	N/A	N/A	N/A	N/A	N/A	N/A	N/A	N/A	N/A	N/A	N/A	Y	N/A	N/A
N/A	N/A	N/A	PICST_32752	N/A	1845	N/A	N/A	N/A	N/A	N/A	N/A	N	N	N	N	N/A	N/A	N/A	N/A	N/A	N/A	N/A	N/A	N/A	N/A	N/A	N/A	N/A	N/A	N/A	N/A	N/A	N	N/A	N/A
N/A	N/A	N/A	PICST_32753	N/A	1846	N/A	N/A	N/A	N/A	N/A	N/A	N	N	N	N	N/A	N/A	N/A	N/A	N/A	N/A	N/A	N/A	N/A	N/A	N/A	N/A	N/A	N/A	N/A	N/A	N/A	N	N/A	N/A
N/A	N/A	N/A	PICST_32795	N/A	1847	N/A	N/A	N/A	N/A	N/A	N/A	Y	N	Y	N	N/A	N/A	N/A	N/A	N/A	N/A	N/A	N/A	N/A	N/A	N/A	N/A	N/A	N/A	N/A	N/A	N/A	Y	N/A	N/A
N/A	N/A	N/A	PICST_32828	N/A	1848	N/A	N/A	N/A	N/A	N/A	N/A	N	N	N	N	N/A	N/A	N/A	N/A	N/A	N/A	N/A	N/A	N/A	N/A	N/A	N/A	N/A	N/A	N/A	N/A	N/A	N	N/A	N/A
N/A	N/A	N/A	PICST_32838	N/A	1849	N/A	N/A	N/A	N/A	N/A	N/A	N	N	N	N	N/A	N/A	N/A	N/A	N/A	N/A	N/A	N/A	N/A	N/A	N/A	N/A	N/A	N/A	N/A	N/A	N/A	N	N/A	N/A
N/A	N/A	N/A	PICST_32842	N/A	1850	N/A	N/A	N/A	N/A	N/A	N/A	N	N	N	N	N/A	N/A	N/A	N/A	N/A	N/A	N/A	N/A	N/A	N/A	N/A	N/A	N/A	N/A	N/A	N/A	N/A	Y	N/A	N/A
N/A	N/A	N/A	PICST_32843	N/A	1851	N/A	N/A	N/A	N/A	N/A	N/A	Y	N	Y	N	N/A	N/A	N/A	N/A	N/A	N/A	N/A	N/A	N/A	N/A	N/A	N/A	N/A	N/A	N/A	N/A	N/A	N	N/A	N/A
N/A	N/A	N/A	PICST_32867	N/A	1852	N/A	N/A	N/A	N/A	N/A	N/A	Y	N	Y	N	N/A	N/A	N/A	N/A	N/A	N/A	N/A	N/A	N/A	N/A	N/A	N/A	N/A	N/A	N/A	N/A	N/A	Y	N/A	N/A
N/A	N/A	N/A	PICST_32941	N/A	1853	N/A	N/A	N/A	N/A	N/A	N/A	Y	N	Y	N	N/A	N/A	N/A	N/A	N/A	N/A	N/A	N/A	N/A	N/A	N/A	N/A	N/A	N/A	N/A	N/A	N/A	N	N/A	N/A
N/A	N/A	N/A	PICST_32948	N/A	1854	N/A	N/A	N/A	N/A	N/A	N/A	Y	N	Y	N	N/A	N/A	N/A	N/A	N/A	N/A	N/A	N/A	N/A	N/A	N/A	N/A	N/A	N/A	N/A	N/A	N/A	N	N/A	N/A
N/A	N/A	N/A	PICST_33022	N/A	1855	N/A	N/A	N/A	N/A	N/A	N/A	N	N	N	N	N/A	N/A	N/A	N/A	N/A	N/A	N/A	N/A	N/A	N/A	N/A	N/A	N/A	N/A	N/A	N/A	N/A	N	N/A	N/A
N/A	N/A	N/A	PICST_33071	N/A	1856	N/A	N/A	N/A	N/A	N/A	N/A	N	N	N	N	N/A	N/A	N/A	N/A	N/A	N/A	N/A	N/A	N/A	N/A	N/A	N/A	N/A	N/A	N/A	N/A	N/A	N	N/A	N/A
N/A	N/A	N/A	PICST_33078	N/A	1857	N/A	N/A	N/A	N/A	N/A	N/A	N	N	N	N	N/A	N/A	N/A	N/A	N/A	N/A	N/A	N/A	N/A	N/A	N/A	N/A	N/A	N/A	N/A	N/A	N/A	Y	N/A	N/A
N/A	N/A	N/A	PICST_33080	N/A	1858	N/A	N/A	N/A	N/A	N/A	N/A	Y	Y	Y	N	N/A	N/A	N/A	N/A	N/A	N/A	N/A	N/A	N/A	N/A	N/A	N/A	N/A	N/A	N/A	N/A	N/A	N	N/A	N/A
N/A	N/A	N/A	PICST_33133	N/A	1859	N/A	N/A	N/A	N/A	N/A	N/A	N	N	N	N	N/A	N/A	N/A	N/A	N/A	N/A	N/A	N/A	N/A	N/A	N/A	N/A	N/A	N/A	N/A	N/A	N/A	Y	N/A	N/A
N/A	N/A	N/A	PICST_33138	N/A	1860	N/A	N/A	N/A	N/A	N/A	N/A	N	N	N	N	N/A	N/A	N/A	N/A	N/A	N/A	N/A	N/A	N/A	N/A	N/A	N/A	N/A	N/A	N/A	N/A	N/A	Y	N/A	N/A
N/A	N/A	N/A	PICST_33211	N/A	1861	N/A	N/A	N/A	N/A	N/A	N/A	Y	Y	Y	N	N/A	N/A	N/A	N/A	N/A	N/A	N/A	N/A	N/A	N/A	N/A	N/A	N/A	N/A	N/A	N/A	N/A	Y	N/A	N/A
N/A	N/A	N/A	PICST_33212	N/A	1862	N/A	N/A	N/A	N/A	N/A	N/A	Y	Y	Y	N	N/A	N/A	N/A	N/A	N/A	N/A	N/A	N/A	N/A	N/A	N/A	N/A	N/A	N/A	N/A	N/A	N/A	N	N/A	N/A
N/A	N/A	N/A	PICST_33213	N/A	1863	N/A	N/A	N/A	N/A	N/A	N/A	N	N	N	N	N/A	N/A	N/A	N/A	N/A	N/A	N/A	N/A	N/A	N/A	N/A	N/A	N/A	N/A	N/A	N/A	N/A	N	N/A	N/A
N/A	N/A	N/A	PICST_33214	N/A	1864	N/A	N/A	N/A	N/A	N/A	N/A	N	N	N	N	N/A	N/A	N/A	N/A	N/A	N/A	N/A	N/A	N/A	N/A	N/A	N/A	N/A	N/A	N/A	N/A	N/A	Y	N/A	N/A
N/A	N/A	N/A	PICST_33215	N/A	1865	N/A	N/A	N/A	N/A	N/A	N/A	N	N	N	N	N/A	N/A	N/A	N/A	N/A	N/A	N/A	N/A	N/A	N/A	N/A	N/A	N/A	N/A	N/A	N/A	N/A	Y	N/A	N/A
N/A	N/A	N/A	PICST_33220	N/A	1866	N/A	N/A	N/A	N/A	N/A	N/A	Y	N	Y	N	N/A	N/A	N/A	N/A	N/A	N/A	N/A	N/A	N/A	N/A	N/A	N/A	N/A	N/A	N/A	N/A	N/A	Y	N/A	N/A
N/A	N/A	N/A	PICST_33279	N/A	1867	N/A	N/A	N/A	N/A	N/A	N/A	N	N	N	N	N/A	N/A	N/A	N/A	N/A	N/A	N/A	N/A	N/A	N/A	N/A	N/A	N/A	N/A	N/A	N/A	N/A	Y	N/A	N/A
N/A	N/A	N/A	PICST_33287	N/A	1868	N/A	N/A	N/A	N/A	N/A	N/A	N	N	N	N	N/A	N/A	N/A	N/A	N/A	N/A	N/A	N/A	N/A	N/A	N/A	N/A	N/A	N/A	N/A	N/A	N/A	N	N/A	N/A
N/A	N/A	N/A	PICST_33291	N/A	1869	N/A	N/A	N/A	N/A	N/A	N/A	N	N	N	N	N/A	N/A	N/A	N/A	N/A	N/A	N/A	N/A	N/A	N/A	N/A	N/A	N/A	N/A	N/A	N/A	N/A	Y	N/A	N/A
N/A	N/A	N/A	PICST_33302	N/A	1870	N/A	N/A	N/A	N/A	N/A	N/A	N	N	N	N	N/A	N/A	N/A	N/A	N/A	N/A	N/A	N/A	N/A	N/A	N/A	N/A	N/A	N/A	N/A	N/A	N/A	Y	N/A	N/A
N/A	N/A	N/A	PICST_33305	N/A	1871	N/A	N/A	N/A	N/A	N/A	N/A	N	N	N	N	N/A	N/A	N/A	N/A	N/A	N/A	N/A	N/A	N/A	N/A	N/A	N/A	N/A	N/A	N/A	N/A	N/A	Y	N/A	N/A
N/A	N/A	N/A	PICST_33327	N/A	1872	N/A	N/A	N/A	N/A	N/A	N/A	N	N	N	N	N/A	N/A	N/A	N/A	N/A	N/A	N/A	N/A	N/A	N/A	N/A	N/A	N/A	N/A	N/A	N/A	N/A	Y	N/A	N/A
N/A	N/A	N/A	PICST_33333	N/A	1873	N/A	N/A	N/A	N/A	N/A	N/A	Y	N	Y	N	N/A	N/A	N/A	N/A	N/A	N/A	N/A	N/A	N/A	N/A	N/A	N/A	N/A	N/A	N/A	N/A	N/A	N	N/A	N/A
N/A	N/A	N/A	PICST_33363	N/A	1874	N/A	N/A	N/A	N/A	N/A	N/A	N	N	N	N	N/A	N/A	N/A	N/A	N/A	N/A	N/A	N/A	N/A	N/A	N/A	N/A	N/A	N/A	N/A	N/A	N/A	N	N/A	N/A
N/A	N/A	N/A	PICST_33381	N/A	1875	N/A	N/A	N/A	N/A	N/A	N/A	N	N	N	N	N/A	N/A	N/A	N/A	N/A	N/A	N/A	N/A	N/A	N/A	N/A	N/A	N/A	N/A	N/A	N/A	N/A	N	N/A	N/A
N/A	N/A	N/A	PICST_33382	N/A	1876	N/A	N/A	N/A	N/A	N/A	N/A	N	N	N	N	N/A	N/A	N/A	N/A	N/A	N/A	N/A	N/A	N/A	N/A	N/A	N/A	N/A	N/A	N/A	N/A	N/A	Y	N/A	N/A
N/A	N/A	N/A	PICST_33383	N/A	1877	N/A	N/A	N/A	N/A	N/A	N/A	N	N	N	N	N/A	N/A	N/A	N/A	N/A	N/A	N/A	N/A	N/A	N/A	N/A	N/A	N/A	N/A	N/A	N/A	N/A	Y	N/A	N/A
N/A	N/A	N/A	PICST_33386	N/A	1878	N/A	N/A	N/A	N/A	N/A	N/A	N	N	N	N	N/A	N/A	N/A	N/A	N/A	N/A	N/A	N/A	N/A	N/A	N/A	N/A	N/A	N/A	N/A	N/A	N/A	Y	N/A	N/A
N/A	N/A	N/A	PICST_33387	N/A	1879	N/A	N/A	N/A	N/A	N/A	N/A	N	N	N	N	N/A	N/A	N/A	N/A	N/A	N/A	N/A	N/A	N/A	N/A	N/A	N/A	N/A	N/A	N/A	N/A	N/A	Y	N/A	N/A
N/A	N/A	N/A	PICST_33409	N/A	1880	N/A	N/A	N/A	N/A	N/A	N/A	N	N	N	N	N/A	N/A	N/A	N/A	N/A	N/A	N/A	N/A	N/A	N/A	N/A	N/A	N/A	N/A	N/A	N/A	N/A	Y	N/A	N/A
N/A	N/A	N/A	PICST_33410	N/A	1881	N/A	N/A	N/A	N/A	N/A	N/A	N	N	N	N	N/A	N/A	N/A	N/A	N/A	N/A	N/A	N/A	N/A	N/A	N/A	N/A	N/A	N/A	N/A	N/A	N/A	Y	N/A	N/A
N/A	N/A	N/A	PICST_33418	N/A	1882	N/A	N/A	N/A	N/A	N/A	N/A	Y	N	Y	N	N/A	N/A	N/A	N/A	N/A	N/A	N/A	N/A	N/A	N/A	N/A	N/A	N/A	N/A	N/A	N/A	N/A	Y	N/A	N/A
N/A	N/A	N/A	PICST_33429	N/A	1883	N/A	N/A	N/A	N/A	N/A	N/A	Y	N	Y	N	N/A	N/A	N/A	N/A	N/A	N/A	N/A	N/A	N/A	N/A	N/A	N/A	N/A	N/A	N/A	N/A	N/A	N	N/A	N/A
N/A	N/A	N/A	PICST_33431	N/A	1884	N/A	N/A	N/A	N/A	N/A	N/A	N	N	N	N	N/A	N/A	N/A	N/A	N/A	N/A	N/A	N/A	N/A	N/A	N/A	N/A	N/A	N/A	N/A	N/A	N/A	N	N/A	N/A
N/A	N/A	N/A	PICST_33511	N/A	1885	N/A	N/A	N/A	N/A	N/A	N/A	Y	N	Y	N	N/A	N/A	N/A	N/A	N/A	N/A	N/A	N/A	N/A	N/A	N/A	N/A	N/A	N/A	N/A	N/A	N/A	Y	N/A	N/A
N/A	N/A	N/A	PICST_33523	N/A	1886	N/A	N/A	N/A	N/A	N/A	N/A	Y	Y	Y	N	N/A	N/A	N/A	N/A	N/A	N/A	N/A	N/A	N/A	N/A	N/A	N/A	N/A	N/A	N/A	N/A	N/A	N	N/A	N/A
N/A	N/A	N/A	PICST_33560	N/A	1887	N/A	N/A	N/A	N/A	N/A	N/A	N	N	N	N	N/A	N/A	N/A	N/A	N/A	N/A	N/A	N/A	N/A	N/A	N/A	N/A	N/A	N/A	N/A	N/A	N/A	N	N/A	N/A
N/A	N/A	N/A	PICST_33564	N/A	1888	N/A	N/A	N/A	N/A	N/A	N/A	N	N	N	N	N/A	N/A	N/A	N/A	N/A	N/A	N/A	N/A	N/A	N/A	N/A	N/A	N/A	N/A	N/A	N/A	N/A	N	N/A	N/A
N/A	N/A	N/A	PICST_33594	N/A	1889	N/A	N/A	N/A	N/A	N/A	N/A	N	N	N	N	N/A	N/A	N/A	N/A	N/A	N/A	N/A	N/A	N/A	N/A	N/A	N/A	N/A	N/A	N/A	N/A	N/A	Y	N/A	N/A
N/A	N/A	N/A	PICST_33600	N/A	1890	N/A	N/A	N/A	N/A	N/A	N/A	N	N	N	N	N/A	N/A	N/A	N/A	N/A	N/A	N/A	N/A	N/A	N/A	N/A	N/A	N/A	N/A	N/A	N/A	N/A	N	N/A	N/A
N/A	N/A	N/A	PICST_33612	N/A	1891	N/A	N/A	N/A	N/A	N/A	N/A	Y	Y	Y	N	N/A	N/A	N/A	N/A	N/A	N/A	N/A	N/A	N/A	N/A	N/A	N/A	N/A	N/A	N/A	N/A	N/A	Y	N/A	N/A
N/A	N/A	N/A	PICST_33613	N/A	1892	N/A	N/A	N/A	N/A	N/A	N/A	N	N	N	N	N/A	N/A	N/A	N/A	N/A	N/A	N/A	N/A	N/A	N/A	N/A	N/A	N/A	N/A	N/A	N/A	N/A	Y	N/A	N/A
N/A	N/A	N/A	PICST_33614	N/A	1893	N/A	N/A	N/A	N/A	N/A	N/A	Y	N	Y	N	N/A	N/A	N/A	N/A	N/A	N/A	N/A	N/A	N/A	N/A	N/A	N/A	N/A	N/A	N/A	N/A	N/A	Y	N/A	N/A
N/A	N/A	N/A	PICST_33652	N/A	1894	N/A	N/A	N/A	N/A	N/A	N/A	Y	N	Y	N	N/A	N/A	N/A	N/A	N/A	N/A	N/A	N/A	N/A	N/A	N/A	N/A	N/A	N/A	N/A	N/A	N/A	Y	N/A	N/A
N/A	N/A	N/A	PICST_33673	N/A	1895	N/A	N/A	N/A	N/A	N/A	N/A	N	N	N	N	N/A	N/A	N/A	N/A	N/A	N/A	N/A	N/A	N/A	N/A	N/A	N/A	N/A	N/A	N/A	N/A	N/A	Y	N/A	N/A
N/A	N/A	N/A	PICST_33678	N/A	1896	N/A	N/A	N/A	N/A	N/A	N/A	N	N	N	N	N/A	N/A	N/A	N/A	N/A	N/A	N/A	N/A	N/A	N/A	N/A	N/A	N/A	N/A	N/A	N/A	N/A	Y	N/A	N/A
N/A	N/A	N/A	PICST_33703	N/A	1897	N/A	N/A	N/A	N/A	N/A	N/A	N	N	N	N	N/A	N/A	N/A	N/A	N/A	N/A	N/A	N/A	N/A	N/A	N/A	N/A	N/A	N/A	N/A	N/A	N/A	N	N/A	N/A
N/A	N/A	N/A	PICST_33721	N/A	1898	N/A	N/A	N/A	N/A	N/A	N/A	N	N	N	N	N/A	N/A	N/A	N/A	N/A	N/A	N/A	N/A	N/A	N/A	N/A	N/A	N/A	N/A	N/A	N/A	N/A	Y	N/A	N/A
N/A	N/A	N/A	PICST_33744	N/A	1899	N/A	N/A	N/A	N/A	N/A	N/A	Y	Y	Y	N	N/A	N/A	N/A	N/A	N/A	N/A	N/A	N/A	N/A	N/A	N/A	N/A	N/A	N/A	N/A	N/A	N/A	Y	N/A	N/A
N/A	N/A	N/A	PICST_33753	N/A	1900	N/A	N/A	N/A	N/A	N/A	N/A	N	N	N	N	N/A	N/A	N/A	N/A	N/A	N/A	N/A	N/A	N/A	N/A	N/A	N/A	N/A	N/A	N/A	N/A	N/A	Y	N/A	N/A
N/A	N/A	N/A	PICST_33784	N/A	1901	N/A	N/A	N/A	N/A	N/A	N/A	N	N	N	N	N/A	N/A	N/A	N/A	N/A	N/A	N/A	N/A	N/A	N/A	N/A	N/A	N/A	N/A	N/A	N/A	N/A	N	N/A	N/A
N/A	N/A	N/A	PICST_33804	N/A	1902	N/A	N/A	N/A	N/A	N/A	N/A	N	N	N	N	N/A	N/A	N/A	N/A	N/A	N/A	N/A	N/A	N/A	N/A	N/A	N/A	N/A	N/A	N/A	N/A	N/A	Y	N/A	N/A
N/A	N/A	N/A	PICST_33812	N/A	1903	N/A	N/A	N/A	N/A	N/A	N/A	Y	N	Y	N	N/A	N/A	N/A	N/A	N/A	N/A	N/A	N/A	N/A	N/A	N/A	N/A	N/A	N/A	N/A	N/A	N/A	Y	N/A	N/A
N/A	N/A	N/A	PICST_33930	N/A	1904	N/A	N/A	N/A	N/A	N/A	N/A	N	N	N	N	N/A	N/A	N/A	N/A	N/A	N/A	N/A	N/A	N/A	N/A	N/A	N/A	N/A	N/A	N/A	N/A	N/A	Y	N/A	N/A
N/A	N/A	N/A	PICST_33983	N/A	1905	N/A	N/A	N/A	N/A	N/A	N/A	N	N	N	N	N/A	N/A	N/A	N/A	N/A	N/A	N/A	N/A	N/A	N/A	N/A	N/A	N/A	N/A	N/A	N/A	N/A	N	N/A	N/A
N/A	N/A	N/A	PICST_33987	N/A	1906	N/A	N/A	N/A	N/A	N/A	N/A	N	N	N	N	N/A	N/A	N/A	N/A	N/A	N/A	N/A	N/A	N/A	N/A	N/A	N/A	N/A	N/A	N/A	N/A	N/A	N	N/A	N/A
N/A	N/A	N/A	PICST_33997	N/A	1907	N/A	N/A	N/A	N/A	N/A	N/A	Y	N	Y	N	N/A	N/A	N/A	N/A	N/A	N/A	N/A	N/A	N/A	N/A	N/A	N/A	N/A	N/A	N/A	N/A	N/A	Y	N/A	N/A
N/A	N/A	N/A	PICST_3402	N/A	1908	N/A	N/A	N/A	N/A	N/A	N/A	Y	N	Y	N	N/A	N/A	N/A	N/A	N/A	N/A	N/A	N/A	N/A	N/A	N/A	N/A	N/A	N/A	N/A	N/A	N/A	Y	N/A	N/A
N/A	N/A	N/A	PICST_34027	N/A	1909	N/A	N/A	N/A	N/A	N/A	N/A	N	N	N	N	N/A	N/A	N/A	N/A	N/A	N/A	N/A	N/A	N/A	N/A	N/A	N/A	N/A	N/A	N/A	N/A	N/A	N	N/A	N/A
N/A	N/A	N/A	PICST_34123	N/A	1910	N/A	N/A	N/A	N/A	N/A	N/A	N	N	N	N	N/A	N/A	N/A	N/A	N/A	N/A	N/A	N/A	N/A	N/A	N/A	N/A	N/A	N/A	N/A	N/A	N/A	N	N/A	N/A
N/A	N/A	N/A	PICST_34292	N/A	1911	N/A	N/A	N/A	N/A	N/A	N/A	N	N	N	N	N/A	N/A	N/A	N/A	N/A	N/A	N/A	N/A	N/A	N/A	N/A	N/A	N/A	N/A	N/A	N/A	N/A	N	N/A	N/A
N/A	N/A	N/A	PICST_34417	N/A	1912	N/A	N/A	N/A	N/A	N/A	N/A	N	N	N	N	N/A	N/A	N/A	N/A	N/A	N/A	N/A	N/A	N/A	N/A	N/A	N/A	N/A	N/A	N/A	N/A	N/A	N	N/A	N/A
N/A	N/A	N/A	PICST_34542	N/A	1913	N/A	N/A	N/A	N/A	N/A	N/A	N	N	N	N	N/A	N/A	N/A	N/A	N/A	N/A	N/A	N/A	N/A	N/A	N/A	N/A	N/A	N/A	N/A	N/A	N/A	Y	N/A	N/A
N/A	N/A	N/A	PICST_34588	N/A	1914	N/A	N/A	N/A	N/A	N/A	N/A	N	N	N	N	N/A	N/A	N/A	N/A	N/A	N/A	N/A	N/A	N/A	N/A	N/A	N/A	N/A	N/A	N/A	N/A	N/A	N	N/A	N/A
N/A	N/A	N/A	PICST_34593	N/A	1915	N/A	N/A	N/A	N/A	N/A	N/A	Y	Y	Y	N	N/A	N/A	N/A	N/A	N/A	N/A	N/A	N/A	N/A	N/A	N/A	N/A	N/A	N/A	N/A	N/A	N/A	N	N/A	N/A
N/A	N/A	N/A	PICST_34605	N/A	1916	N/A	N/A	N/A	N/A	N/A	N/A	Y	N	Y	N	N/A	N/A	N/A	N/A	N/A	N/A	N/A	N/A	N/A	N/A	N/A	N/A	N/A	N/A	N/A	N/A	N/A	Y	N/A	N/A
N/A	N/A	N/A	PICST_34797	N/A	1917	N/A	N/A	N/A	N/A	N/A	N/A	N	N	N	N	N/A	N/A	N/A	N/A	N/A	N/A	N/A	N/A	N/A	N/A	N/A	N/A	N/A	N/A	N/A	N/A	N/A	Y	N/A	N/A
N/A	N/A	N/A	PICST_34802	N/A	1918	N/A	N/A	N/A	N/A	N/A	N/A	N	N	N	N	N/A	N/A	N/A	N/A	N/A	N/A	N/A	N/A	N/A	N/A	N/A	N/A	N/A	N/A	N/A	N/A	N/A	Y	N/A	N/A
N/A	N/A	N/A	PICST_34825	N/A	1919	N/A	N/A	N/A	N/A	N/A	N/A	Y	N	Y	N	N/A	N/A	N/A	N/A	N/A	N/A	N/A	N/A	N/A	N/A	N/A	N/A	N/A	N/A	N/A	N/A	N/A	Y	N/A	N/A
N/A	N/A	N/A	PICST_34974	N/A	1920	N/A	N/A	N/A	N/A	N/A	N/A	Y	N	Y	N	N/A	N/A	N/A	N/A	N/A	N/A	N/A	N/A	N/A	N/A	N/A	N/A	N/A	N/A	N/A	N/A	N/A	Y	N/A	N/A
N/A	N/A	N/A	PICST_35133	N/A	1921	N/A	N/A	N/A	N/A	N/A	N/A	N	N	N	N	N/A	N/A	N/A	N/A	N/A	N/A	N/A	N/A	N/A	N/A	N/A	N/A	N/A	N/A	N/A	N/A	N/A	Y	N/A	N/A
N/A	N/A	N/A	PICST_3529	N/A	1922	N/A	N/A	N/A	N/A	N/A	N/A	Y	N	Y	N	N/A	N/A	N/A	N/A	N/A	N/A	N/A	N/A	N/A	N/A	N/A	N/A	N/A	N/A	N/A	N/A	N/A	Y	N/A	N/A
N/A	N/A	N/A	PICST_35358	N/A	1923	N/A	N/A	N/A	N/A	N/A	N/A	N	N	N	N	N/A	N/A	N/A	N/A	N/A	N/A	N/A	N/A	N/A	N/A	N/A	N/A	N/A	N/A	N/A	N/A	N/A	Y	N/A	N/A
N/A	N/A	N/A	PICST_35479	N/A	1924	N/A	N/A	N/A	N/A	N/A	N/A	N	N	N	N	N/A	N/A	N/A	N/A	N/A	N/A	N/A	N/A	N/A	N/A	N/A	N/A	N/A	N/A	N/A	N/A	N/A	Y	N/A	N/A
N/A	N/A	N/A	PICST_35662	N/A	1925	N/A	N/A	N/A	N/A	N/A	N/A	N	N	N	N	N/A	N/A	N/A	N/A	N/A	N/A	N/A	N/A	N/A	N/A	N/A	N/A	N/A	N/A	N/A	N/A	N/A	Y	N/A	N/A
N/A	N/A	N/A	PICST_35725	N/A	1926	N/A	N/A	N/A	N/A	N/A	N/A	N	N	N	N	N/A	N/A	N/A	N/A	N/A	N/A	N/A	N/A	N/A	N/A	N/A	N/A	N/A	N/A	N/A	N/A	N/A	Y	N/A	N/A
N/A	N/A	N/A	PICST_35732	N/A	1927	N/A	N/A	N/A	N/A	N/A	N/A	Y	N	Y	N	N/A	N/A	N/A	N/A	N/A	N/A	N/A	N/A	N/A	N/A	N/A	N/A	N/A	N/A	N/A	N/A	N/A	Y	N/A	N/A
N/A	N/A	N/A	PICST_35799	N/A	1928	N/A	N/A	N/A	N/A	N/A	N/A	N	N	N	N	N/A	N/A	N/A	N/A	N/A	N/A	N/A	N/A	N/A	N/A	N/A	N/A	N/A	N/A	N/A	N/A	N/A	Y	N/A	N/A
N/A	N/A	N/A	PICST_36132	N/A	1929	N/A	N/A	N/A	N/A	N/A	N/A	N	N	N	N	N/A	N/A	N/A	N/A	N/A	N/A	N/A	N/A	N/A	N/A	N/A	N/A	N/A	N/A	N/A	N/A	N/A	Y	N/A	N/A
N/A	N/A	N/A	PICST_36494	N/A	1930	N/A	N/A	N/A	N/A	N/A	N/A	Y	N	Y	N	N/A	N/A	N/A	N/A	N/A	N/A	N/A	N/A	N/A	N/A	N/A	N/A	N/A	N/A	N/A	N/A	N/A	Y	N/A	N/A
N/A	N/A	N/A	PICST_36557	N/A	1931	N/A	N/A	N/A	N/A	N/A	N/A	N	N	N	N	N/A	N/A	N/A	N/A	N/A	N/A	N/A	N/A	N/A	N/A	N/A	N/A	N/A	N/A	N/A	N/A	N/A	N	N/A	N/A
N/A	N/A	N/A	PICST_37102	N/A	1932	N/A	N/A	N/A	N/A	N/A	N/A	N	N	N	N	N/A	N/A	N/A	N/A	N/A	N/A	N/A	N/A	N/A	N/A	N/A	N/A	N/A	N/A	N/A	N/A	N/A	Y	N/A	N/A
N/A	N/A	N/A	PICST_37142	N/A	1933	N/A	N/A	N/A	N/A	N/A	N/A	Y	N	Y	N	N/A	N/A	N/A	N/A	N/A	N/A	N/A	N/A	N/A	N/A	N/A	N/A	N/A	N/A	N/A	N/A	N/A	Y	N/A	N/A
N/A	N/A	N/A	PICST_37376	N/A	1934	N/A	N/A	N/A	N/A	N/A	N/A	N	N	N	N	N/A	N/A	N/A	N/A	N/A	N/A	N/A	N/A	N/A	N/A	N/A	N/A	N/A	N/A	N/A	N/A	N/A	Y	N/A	N/A
N/A	N/A	N/A	PICST_37839	N/A	1935	N/A	N/A	N/A	N/A	N/A	N/A	N	N	N	N	N/A	N/A	N/A	N/A	N/A	N/A	N/A	N/A	N/A	N/A	N/A	N/A	N/A	N/A	N/A	N/A	N/A	N	N/A	N/A
N/A	N/A	N/A	PICST_38391	N/A	1936	N/A	N/A	N/A	N/A	N/A	N/A	N	N	N	N	N/A	N/A	N/A	N/A	N/A	N/A	N/A	N/A	N/A	N/A	N/A	N/A	N/A	N/A	N/A	N/A	N/A	N	N/A	N/A
N/A	N/A	N/A	PICST_38489	N/A	1937	N/A	N/A	N/A	N/A	N/A	N/A	N	N	N	N	N/A	N/A	N/A	N/A	N/A	N/A	N/A	N/A	N/A	N/A	N/A	N/A	N/A	N/A	N/A	N/A	N/A	N	N/A	N/A
N/A	N/A	N/A	PICST_3849	N/A	1938	N/A	N/A	N/A	N/A	N/A	N/A	Y	Y	Y	N	N/A	N/A	N/A	N/A	N/A	N/A	N/A	N/A	N/A	N/A	N/A	N/A	N/A	N/A	N/A	N/A	N/A	Y	N/A	N/A
N/A	N/A	N/A	PICST_38981	N/A	1939	N/A	N/A	N/A	N/A	N/A	N/A	N	N	N	N	N/A	N/A	N/A	N/A	N/A	N/A	N/A	N/A	N/A	N/A	N/A	N/A	N/A	N/A	N/A	N/A	N/A	N	N/A	N/A
N/A	N/A	N/A	PICST_39160	N/A	1940	N/A	N/A	N/A	N/A	N/A	N/A	N	N	N	N	N/A	N/A	N/A	N/A	N/A	N/A	N/A	N/A	N/A	N/A	N/A	N/A	N/A	N/A	N/A	N/A	N/A	N	N/A	N/A
N/A	N/A	N/A	PICST_39216	N/A	1941	N/A	N/A	N/A	N/A	N/A	N/A	N	N	N	N	N/A	N/A	N/A	N/A	N/A	N/A	N/A	N/A	N/A	N/A	N/A	N/A	N/A	N/A	N/A	N/A	N/A	Y	N/A	N/A
N/A	N/A	N/A	PICST_39320	N/A	1942	N/A	N/A	N/A	N/A	N/A	N/A	N	N	N	N	N/A	N/A	N/A	N/A	N/A	N/A	N/A	N/A	N/A	N/A	N/A	N/A	N/A	N/A	N/A	N/A	N/A	Y	N/A	N/A
N/A	N/A	N/A	PICST_39416	N/A	1943	N/A	N/A	N/A	N/A	N/A	N/A	Y	N	Y	N	N/A	N/A	N/A	N/A	N/A	N/A	N/A	N/A	N/A	N/A	N/A	N/A	N/A	N/A	N/A	N/A	N/A	Y	N/A	N/A
N/A	N/A	N/A	PICST_39453	N/A	1944	N/A	N/A	N/A	N/A	N/A	N/A	N	N	N	N	N/A	N/A	N/A	N/A	N/A	N/A	N/A	N/A	N/A	N/A	N/A	N/A	N/A	N/A	N/A	N/A	N/A	Y	N/A	N/A
N/A	N/A	N/A	PICST_39560	N/A	1945	N/A	N/A	N/A	N/A	N/A	N/A	N	N	N	N	N/A	N/A	N/A	N/A	N/A	N/A	N/A	N/A	N/A	N/A	N/A	N/A	N/A	N/A	N/A	N/A	N/A	N	N/A	N/A
N/A	N/A	N/A	PICST_39662	N/A	1946	N/A	N/A	N/A	N/A	N/A	N/A	N	N	N	N	N/A	N/A	N/A	N/A	N/A	N/A	N/A	N/A	N/A	N/A	N/A	N/A	N/A	N/A	N/A	N/A	N/A	Y	N/A	N/A
N/A	N/A	N/A	PICST_39722	N/A	1947	N/A	N/A	N/A	N/A	N/A	N/A	N	N	N	N	N/A	N/A	N/A	N/A	N/A	N/A	N/A	N/A	N/A	N/A	N/A	N/A	N/A	N/A	N/A	N/A	N/A	Y	N/A	N/A
N/A	N/A	N/A	PICST_39804	N/A	1948	N/A	N/A	N/A	N/A	N/A	N/A	N	N	N	N	N/A	N/A	N/A	N/A	N/A	N/A	N/A	N/A	N/A	N/A	N/A	N/A	N/A	N/A	N/A	N/A	N/A	N	N/A	N/A
N/A	N/A	N/A	PICST_40058	N/A	1949	N/A	N/A	N/A	N/A	N/A	N/A	Y	Y	Y	N	N/A	N/A	N/A	N/A	N/A	N/A	N/A	N/A	N/A	N/A	N/A	N/A	N/A	N/A	N/A	N/A	N/A	Y	N/A	N/A
N/A	N/A	N/A	PICST_40070	N/A	1950	N/A	N/A	N/A	N/A	N/A	N/A	N	N	N	N	N/A	N/A	N/A	N/A	N/A	N/A	N/A	N/A	N/A	N/A	N/A	N/A	N/A	N/A	N/A	N/A	N/A	Y	N/A	N/A
N/A	N/A	N/A	PICST_40145	N/A	1951	N/A	N/A	N/A	N/A	N/A	N/A	Y	N	Y	N	N/A	N/A	N/A	N/A	N/A	N/A	N/A	N/A	N/A	N/A	N/A	N/A	N/A	N/A	N/A	N/A	N/A	N	N/A	N/A
N/A	N/A	N/A	PICST_40173	N/A	1952	N/A	N/A	N/A	N/A	N/A	N/A	N	N	N	N	N/A	N/A	N/A	N/A	N/A	N/A	N/A	N/A	N/A	N/A	N/A	N/A	N/A	N/A	N/A	N/A	N/A	Y	N/A	N/A
N/A	N/A	N/A	PICST_40211	N/A	1953	N/A	N/A	N/A	N/A	N/A	N/A	N	N	N	N	N/A	N/A	N/A	N/A	N/A	N/A	N/A	N/A	N/A	N/A	N/A	N/A	N/A	N/A	N/A	N/A	N/A	Y	N/A	N/A
N/A	N/A	N/A	PICST_40322	N/A	1954	N/A	N/A	N/A	N/A	N/A	N/A	Y	N	Y	N	N/A	N/A	N/A	N/A	N/A	N/A	N/A	N/A	N/A	N/A	N/A	N/A	N/A	N/A	N/A	N/A	N/A	Y	N/A	N/A
N/A	N/A	N/A	PICST_40413	N/A	1955	N/A	N/A	N/A	N/A	N/A	N/A	N	N	N	N	N/A	N/A	N/A	N/A	N/A	N/A	N/A	N/A	N/A	N/A	N/A	N/A	N/A	N/A	N/A	N/A	N/A	Y	N/A	N/A
N/A	N/A	N/A	PICST_40466	N/A	1956	N/A	N/A	N/A	N/A	N/A	N/A	N	N	N	N	N/A	N/A	N/A	N/A	N/A	N/A	N/A	N/A	N/A	N/A	N/A	N/A	N/A	N/A	N/A	N/A	N/A	N	N/A	N/A
N/A	N/A	N/A	PICST_40574	N/A	1957	N/A	N/A	N/A	N/A	N/A	N/A	Y	N	Y	N	N/A	N/A	N/A	N/A	N/A	N/A	N/A	N/A	N/A	N/A	N/A	N/A	N/A	N/A	N/A	N/A	N/A	Y	N/A	N/A
N/A	N/A	N/A	PICST_41230	N/A	1958	N/A	N/A	N/A	N/A	N/A	N/A	Y	N	Y	N	N/A	N/A	N/A	N/A	N/A	N/A	N/A	N/A	N/A	N/A	N/A	N/A	N/A	N/A	N/A	N/A	N/A	N	N/A	N/A
N/A	N/A	N/A	PICST_41353	N/A	1959	N/A	N/A	N/A	N/A	N/A	N/A	N	N	N	N	N/A	N/A	N/A	N/A	N/A	N/A	N/A	N/A	N/A	N/A	N/A	N/A	N/A	N/A	N/A	N/A	N/A	N	N/A	N/A
N/A	N/A	N/A	PICST_41374	N/A	1960	N/A	N/A	N/A	N/A	N/A	N/A	Y	N	Y	N	N/A	N/A	N/A	N/A	N/A	N/A	N/A	N/A	N/A	N/A	N/A	N/A	N/A	N/A	N/A	N/A	N/A	N	N/A	N/A
N/A	N/A	N/A	PICST_41452	N/A	1961	N/A	N/A	N/A	N/A	N/A	N/A	Y	N	Y	N	N/A	N/A	N/A	N/A	N/A	N/A	N/A	N/A	N/A	N/A	N/A	N/A	N/A	N/A	N/A	N/A	N/A	Y	N/A	N/A
N/A	N/A	N/A	PICST_41479	N/A	1962	N/A	N/A	N/A	N/A	N/A	N/A	N	N	N	N	N/A	N/A	N/A	N/A	N/A	N/A	N/A	N/A	N/A	N/A	N/A	N/A	N/A	N/A	N/A	N/A	N/A	Y	N/A	N/A
N/A	N/A	N/A	PICST_41754	N/A	1963	N/A	N/A	N/A	N/A	N/A	N/A	N	N	N	N	N/A	N/A	N/A	N/A	N/A	N/A	N/A	N/A	N/A	N/A	N/A	N/A	N/A	N/A	N/A	N/A	N/A	Y	N/A	N/A
N/A	N/A	N/A	PICST_41766	N/A	1964	N/A	N/A	N/A	N/A	N/A	N/A	Y	N	Y	N	N/A	N/A	N/A	N/A	N/A	N/A	N/A	N/A	N/A	N/A	N/A	N/A	N/A	N/A	N/A	N/A	N/A	Y	N/A	N/A
N/A	N/A	N/A	PICST_42120	N/A	1965	N/A	N/A	N/A	N/A	N/A	N/A	N	N	N	N	N/A	N/A	N/A	N/A	N/A	N/A	N/A	N/A	N/A	N/A	N/A	N/A	N/A	N/A	N/A	N/A	N/A	Y	N/A	N/A
N/A	N/A	N/A	PICST_42452	N/A	1966	N/A	N/A	N/A	N/A	N/A	N/A	N	N	N	N	N/A	N/A	N/A	N/A	N/A	N/A	N/A	N/A	N/A	N/A	N/A	N/A	N/A	N/A	N/A	N/A	N/A	Y	N/A	N/A
N/A	N/A	N/A	PICST_42671	N/A	1967	N/A	N/A	N/A	N/A	N/A	N/A	N	N	N	N	N/A	N/A	N/A	N/A	N/A	N/A	N/A	N/A	N/A	N/A	N/A	N/A	N/A	N/A	N/A	N/A	N/A	Y	N/A	N/A
N/A	N/A	N/A	PICST_42941	N/A	1968	N/A	N/A	N/A	N/A	N/A	N/A	N	N	N	N	N/A	N/A	N/A	N/A	N/A	N/A	N/A	N/A	N/A	N/A	N/A	N/A	N/A	N/A	N/A	N/A	N/A	Y	N/A	N/A
N/A	N/A	N/A	PICST_43205	N/A	1969	N/A	N/A	N/A	N/A	N/A	N/A	Y	N	Y	N	N/A	N/A	N/A	N/A	N/A	N/A	N/A	N/A	N/A	N/A	N/A	N/A	N/A	N/A	N/A	N/A	N/A	Y	N/A	N/A
N/A	N/A	N/A	PICST_43263	N/A	1970	N/A	N/A	N/A	N/A	N/A	N/A	N	N	N	N	N/A	N/A	N/A	N/A	N/A	N/A	N/A	N/A	N/A	N/A	N/A	N/A	N/A	N/A	N/A	N/A	N/A	Y	N/A	N/A
N/A	N/A	N/A	PICST_43525	N/A	1971	N/A	N/A	N/A	N/A	N/A	N/A	N	N	N	N	N/A	N/A	N/A	N/A	N/A	N/A	N/A	N/A	N/A	N/A	N/A	N/A	N/A	N/A	N/A	N/A	N/A	N	N/A	N/A
N/A	N/A	N/A	PICST_43564	N/A	1972	N/A	N/A	N/A	N/A	N/A	N/A	N	N	N	N	N/A	N/A	N/A	N/A	N/A	N/A	N/A	N/A	N/A	N/A	N/A	N/A	N/A	N/A	N/A	N/A	N/A	N	N/A	N/A
N/A	N/A	N/A	PICST_43699	N/A	1973	N/A	N/A	N/A	N/A	N/A	N/A	N	N	N	N	N/A	N/A	N/A	N/A	N/A	N/A	N/A	N/A	N/A	N/A	N/A	N/A	N/A	N/A	N/A	N/A	N/A	Y	N/A	N/A
N/A	N/A	N/A	PICST_43720	N/A	1974	N/A	N/A	N/A	N/A	N/A	N/A	N	N	N	N	N/A	N/A	N/A	N/A	N/A	N/A	N/A	N/A	N/A	N/A	N/A	N/A	N/A	N/A	N/A	N/A	N/A	N	N/A	N/A
N/A	N/A	N/A	PICST_43881	N/A	1975	N/A	N/A	N/A	N/A	N/A	N/A	N	N	N	N	N/A	N/A	N/A	N/A	N/A	N/A	N/A	N/A	N/A	N/A	N/A	N/A	N/A	N/A	N/A	N/A	N/A	N	N/A	N/A
N/A	N/A	N/A	PICST_4391	N/A	1976	N/A	N/A	N/A	N/A	N/A	N/A	N	N	N	N	N/A	N/A	N/A	N/A	N/A	N/A	N/A	N/A	N/A	N/A	N/A	N/A	N/A	N/A	N/A	N/A	N/A	Y	N/A	N/A
N/A	N/A	N/A	PICST_44044	N/A	1977	N/A	N/A	N/A	N/A	N/A	N/A	N	N	N	N	N/A	N/A	N/A	N/A	N/A	N/A	N/A	N/A	N/A	N/A	N/A	N/A	N/A	N/A	N/A	N/A	N/A	N	N/A	N/A
N/A	N/A	N/A	PICST_4422	N/A	1978	N/A	N/A	N/A	N/A	N/A	N/A	Y	N	Y	N	N/A	N/A	N/A	N/A	N/A	N/A	N/A	N/A	N/A	N/A	N/A	N/A	N/A	N/A	N/A	N/A	N/A	Y	N/A	N/A
N/A	N/A	N/A	PICST_44235	N/A	1979	N/A	N/A	N/A	N/A	N/A	N/A	Y	Y	Y	N	N/A	N/A	N/A	N/A	N/A	N/A	N/A	N/A	N/A	N/A	N/A	N/A	N/A	N/A	N/A	N/A	N/A	Y	N/A	N/A
N/A	N/A	N/A	PICST_44239	N/A	1980	N/A	N/A	N/A	N/A	N/A	N/A	N	N	N	N	N/A	N/A	N/A	N/A	N/A	N/A	N/A	N/A	N/A	N/A	N/A	N/A	N/A	N/A	N/A	N/A	N/A	N	N/A	N/A
N/A	N/A	N/A	PICST_44246	N/A	1981	N/A	N/A	N/A	N/A	N/A	N/A	Y	N	Y	N	N/A	N/A	N/A	N/A	N/A	N/A	N/A	N/A	N/A	N/A	N/A	N/A	N/A	N/A	N/A	N/A	N/A	Y	N/A	N/A
N/A	N/A	N/A	PICST_44446	N/A	1982	N/A	N/A	N/A	N/A	N/A	N/A	Y	N	Y	N	N/A	N/A	N/A	N/A	N/A	N/A	N/A	N/A	N/A	N/A	N/A	N/A	N/A	N/A	N/A	N/A	N/A	N	N/A	N/A
N/A	N/A	N/A	PICST_44456	N/A	1983	N/A	N/A	N/A	N/A	N/A	N/A	Y	N	Y	N	N/A	N/A	N/A	N/A	N/A	N/A	N/A	N/A	N/A	N/A	N/A	N/A	N/A	N/A	N/A	N/A	N/A	Y	N/A	N/A
N/A	N/A	N/A	PICST_44547	N/A	1984	N/A	N/A	N/A	N/A	N/A	N/A	Y	N	Y	N	N/A	N/A	N/A	N/A	N/A	N/A	N/A	N/A	N/A	N/A	N/A	N/A	N/A	N/A	N/A	N/A	N/A	N	N/A	N/A
N/A	N/A	N/A	PICST_44613	N/A	1985	N/A	N/A	N/A	N/A	N/A	N/A	Y	N	Y	N	N/A	N/A	N/A	N/A	N/A	N/A	N/A	N/A	N/A	N/A	N/A	N/A	N/A	N/A	N/A	N/A	N/A	Y	N/A	N/A
N/A	N/A	N/A	PICST_44614	N/A	1986	N/A	N/A	N/A	N/A	N/A	N/A	N	N	N	N	N/A	N/A	N/A	N/A	N/A	N/A	N/A	N/A	N/A	N/A	N/A	N/A	N/A	N/A	N/A	N/A	N/A	Y	N/A	N/A
N/A	N/A	N/A	PICST_44736	N/A	1987	N/A	N/A	N/A	N/A	N/A	N/A	N	N	N	N	N/A	N/A	N/A	N/A	N/A	N/A	N/A	N/A	N/A	N/A	N/A	N/A	N/A	N/A	N/A	N/A	N/A	Y	N/A	N/A
N/A	N/A	N/A	PICST_44978	N/A	1988	N/A	N/A	N/A	N/A	N/A	N/A	Y	N	Y	N	N/A	N/A	N/A	N/A	N/A	N/A	N/A	N/A	N/A	N/A	N/A	N/A	N/A	N/A	N/A	N/A	N/A	Y	N/A	N/A
N/A	N/A	N/A	PICST_45036	N/A	1989	N/A	N/A	N/A	N/A	N/A	N/A	N	N	N	N	N/A	N/A	N/A	N/A	N/A	N/A	N/A	N/A	N/A	N/A	N/A	N/A	N/A	N/A	N/A	N/A	N/A	Y	N/A	N/A
N/A	N/A	N/A	PICST_45104	N/A	1990	N/A	N/A	N/A	N/A	N/A	N/A	N	N	N	N	N/A	N/A	N/A	N/A	N/A	N/A	N/A	N/A	N/A	N/A	N/A	N/A	N/A	N/A	N/A	N/A	N/A	N	N/A	N/A
N/A	N/A	N/A	PICST_45364	N/A	1991	N/A	N/A	N/A	N/A	N/A	N/A	Y	N	Y	N	N/A	N/A	N/A	N/A	N/A	N/A	N/A	N/A	N/A	N/A	N/A	N/A	N/A	N/A	N/A	N/A	N/A	Y	N/A	N/A
N/A	N/A	N/A	PICST_45857	N/A	1992	N/A	N/A	N/A	N/A	N/A	N/A	N	N	N	N	N/A	N/A	N/A	N/A	N/A	N/A	N/A	N/A	N/A	N/A	N/A	N/A	N/A	N/A	N/A	N/A	N/A	N	N/A	N/A
N/A	N/A	N/A	PICST_45900	N/A	1993	N/A	N/A	N/A	N/A	N/A	N/A	Y	Y	Y	N	N/A	N/A	N/A	N/A	N/A	N/A	N/A	N/A	N/A	N/A	N/A	N/A	N/A	N/A	N/A	N/A	N/A	Y	N/A	N/A
N/A	N/A	N/A	PICST_46030	N/A	1994	N/A	N/A	N/A	N/A	N/A	N/A	N	N	N	N	N/A	N/A	N/A	N/A	N/A	N/A	N/A	N/A	N/A	N/A	N/A	N/A	N/A	N/A	N/A	N/A	N/A	Y	N/A	N/A
N/A	N/A	N/A	PICST_46121	N/A	1995	N/A	N/A	N/A	N/A	N/A	N/A	N	N	N	N	N/A	N/A	N/A	N/A	N/A	N/A	N/A	N/A	N/A	N/A	N/A	N/A	N/A	N/A	N/A	N/A	N/A	Y	N/A	N/A
N/A	N/A	N/A	PICST_46395	N/A	1996	N/A	N/A	N/A	N/A	N/A	N/A	Y	Y	Y	N	N/A	N/A	N/A	N/A	N/A	N/A	N/A	N/A	N/A	N/A	N/A	N/A	N/A	N/A	N/A	N/A	N/A	Y	N/A	N/A
N/A	N/A	N/A	PICST_46510	N/A	1997	N/A	N/A	N/A	N/A	N/A	N/A	N	N	N	N	N/A	N/A	N/A	N/A	N/A	N/A	N/A	N/A	N/A	N/A	N/A	N/A	N/A	N/A	N/A	N/A	N/A	Y	N/A	N/A
N/A	N/A	N/A	PICST_47021	N/A	1998	N/A	N/A	N/A	N/A	N/A	N/A	N	N	N	N	N/A	N/A	N/A	N/A	N/A	N/A	N/A	N/A	N/A	N/A	N/A	N/A	N/A	N/A	N/A	N/A	N/A	Y	N/A	N/A
[truncated: 9,658 more rows]
