# Supplementary material for: Gene regulatory network plasticity predates a switch in function of a conserved transcription regulator
Source: eLife. 2017 Mar 22;6:e23250. doi: 10.7554/eLife.23250 (PMC5391208; doi:10.7554/eLife.23250)
Supplement: Supplementary file 2. — (A) Strains used in this study. (B) Primers used in this study. DOI: http://dx.doi.org/10.7554/eLife.23250.021 [file elife-23250-supp2.xlsx]

## Sheet: Strains
Name	Species	Description	Previous Name	Reference (if applicable)	Genotype
yIN198	S. cerevisiae	Wild-type (SK1 background)	NKY611	(1)	ho::LYS2/ho::LYS2 lys2/lys2 ura3/ura3 leu2::hisG/leu2::hisG
yIN181	S. cerevisiae	Ndt80 deletion (SK1 background)	NKY2296	(1)	ho::LYS2/ho::LYS2 lys2/lys2 ura3/ura3 leu2::hisG/leu2::hisG ndt80::LEU2/ndt80::LEU2
YTS89	S. cerevisiae	Wild-type (W303 background)	yTS89	(2)	MATa leu2-3,112 trp1-1 can1-100 ura3-1 ade2-1 his3-11,15
yIN209	S. cerevisiae	Ndt80-Myc (SK1 background)			ho::LYS2/ho::LYS2 lys2/lys2 ura3/ura3 leu2::hisG/leu2::hisG Ndt80-Myc-Kan/Ndt80
yIN219	S. cerevisiae	Constitutive promoter-Ndt80-Myc (W303 background)			MATa leu2-3,112 trp1-1 can1-100 ura3-1 ade2-1 his3-11,15 Ndt80:pGal1-Ndt80-Myc-NAT-KAN
yIN065	K. lactis	Wild-type	yLB5	(3)	ade1 trp1 leu2 metA1 uraA1 nej1Δ::LEU2 lysA1 trp1 leu2 metA1 uraA1 nej1Δ::LEU2
yIN071	K. lactis	Ndt80 deletion			ade1 trp1 leu2 metA1 uraA1 nej1Δ::LEU2 ndt80::Ura3 lysA1 trp1 leu2 metA1 uraA1 nej1Δ::LEU2 ndt80::Kan
yIN223	K. lactis	Constitutive promoter-Ndt80-Myc			pNdt80-Ndt80:pGal1-Ndt80-Myc-KAN-NAT ade1/ade1 trp1/trip1 leu2/leu2 metA1 uraA1 nej1Δ::LEU2 lysA1/lysA1
yIN091	P.pastoris	Wild-type haploid	JC304	(4)	ade1 his4
yIN092	P. pastoris	Wild-type haploid	JC306	(4)	arg4 ura3
yIN104	P. pastoris	Wild-type diploid			arg4/ARG4 ade1/ADE1 his4/HIS4 ura3/URA3
yIN110	P. pastoris	Ndt80 deletion			arg4/ARG4 ade1/ADE1 his4/HIS4 ura3/URA3 Ndt80::Hph/Ndt80::Hph
yIN183	P. pastoris	Constitutive promoter-Ndt80-Myc			arg4/ARG4 ade1/ADE1 his4/HIS4 ura3/URA3 pTEF1-truncated Ndt80-Myc/NDT80
yIN161	S. stipitis	Wild-type			Prototrophic
yIN194	S. stipitis	Constitutive promoter-Ndt80A-Myc			pTEF1-Ndt80A-Myc-NAT randomly integrated
yIN185	S. stipitis	Constitutive promoter-Ndt80B-Myc			pTEF1-Ndt80B-Myc-NAT randomly integrated
INy081	C. lusitaniae	Wild-type a-cell	RSY284	(5)	ura3
INy082	C. lusitaniae	Wild-type alpha-cell	RSY411	(5)	arg ade CycR
yIN138	C. lusitaniae	Wild-type diploid			Ura3 +/- Arg4 +/- Ade2 +/- CycR +/-
yIN141	C. lusitaniae	Ndt80A deletion			Ura3 +/- Arg4 +/- Ade2 +/- CycR
yIN148	C. lusitaniae	Ndt80B deletion			Ura3 +/- Arg4 +/- ade2- CycR
yIN124	C. albicans	Wild-type	SN250	(6)	ura3D-iro1D::imm434/URA3-IRO1, his1D/his1D, arg4D/arg4D, leu2D/leu2D
TF178	C. albicans	Ndt80A deletion	TF178	(7)	arg4D/arg4D, leu2D/leu2D, his1D/his1D, URA3/ura3D, IRO1/iro1D , Ndt80B:LEU2/Ndt80B:HIS1
TF095	C. albicans	Ndt80B deletion	TF095	(7)	arg4D/arg4D, leu2D/leu2D, his1D/his1D, URA3/ura3D, IRO1/iro1D , Ndt80B:LEU2/Ndt80B:HIS1
yIN123	C. albicans	Ndt80B-Myc	CJN1748	(7)	ura3D-iro1D::imm434/URA3-IRO1, his1D/his1D, arg4D/arg4D, leu2:cdHIS1/leu2:cmLEU2, orf19.2119-Myc/Orf19.2119
yIN118	C. albicans	Constitutive promoter-Ndt80A-Myc			ura3D-iro1D::imm434/URA3-IRO1, his1D/his1D, arg4D/arg4D, leu2:cdHIS1/leu2:cmLEU2, orf19.513::orf19.513-Myc/orf19.513 pOrf19.513::pTDH3-Nat/pOrf19.513
yIN120	C. albicans	Constitutive promoter-Ndt80B-Myc			ura3D-iro1D::imm434/URA3-IRO1, his1D/his1D, arg4D/arg4D, leu2:cdHIS1/leu2:cmLEU2, orf19.2119::orf19.2119-Myc/orf19.2119 pOrf19.513::pTDH3-Nat/pOrf19.513
yIN218	S. cerevisiae	P. pastoris Ndt80-Myc expressed in S. cerevisiae			MATa leu2-3,112 trp1-1 can1-100 ade2-1 his3-11,15 ura3:pGal1-PpNdt80-Myc-Hyg
References
1	Xu L, Ajimura M, Padmore R, Klein C, Kleckner N. NDT80, a meiosis-specific gene required for exit from pachytene in Saccharomyces cerevisiae. Molecular and Cellular Biology. American Society for Microbiology; 1995 Dec 1;15(12):6572–81.
2	Sorrells TR, Booth LN, Tuch BB, Johnson AD. Intersecting transcription networks constrain gene regulatory evolution. Nature. 2015 Jul 8;523(7560):361–5.
3	Booth LN, Tuch BB, Johnson AD. Intercalation of a new tier of transcription regulation into an ancient circuit. Nature. Nature Publishing Group; 2010 Dec 16;468(7326):959–63.
4	Lin Cereghino GP, Lin Cereghino J, Sunga AJ, Johnson MA, Lim M, Gleeson MA, et al. New selectable marker/auxotrophic host strain combinations for molecular genetic manipulation of Pichia pastoris. Gene. 2001 Jan 24;263(1-2):159–69.
5	Sherwood RK, Scaduto CM, Torres SE, Bennett RJ. Convergent evolution of a fused sexual cycle promotes the haploid lifestyle. Nature. Nature Publishing Group; 2014 Feb 20;506(7488):387–90.
6	Noble SM, Johnson AD. Strains and strategies for large-scale gene deletion studies of the diploid human fungal pathogen Candida albicans. Eukaryotic Cell. 2005 Feb 1;4(2):298–309.
7	Nobile CJ, Fox EP, Nett JE, Sorrells TR, Mitrovich QM, Hernday AD, et al. A Recently Evolved Transcriptional Network Controls Biofilm Development in Candida albicans. Cell. Elsevier; 2012 Jan 20;148(1):126–38.

## Sheet: Primers
Primer Name	Description	Sequence
IN_090F	K. lactis Ndt80 KO 5' Homology F	AGTTACGTTTCGCTGGAAGTTCGACC
IN_092R	K. lactis Ndt80 KO 5' Homology R	cacggcgcgcctagcagcggAGCAAGTTTGATCACATAAAACTATACTCTGTTCCTAT
IN_093F	K. lactis Ndt80 KO 3' Homology F	gtcagcggccgcatccctgcTAGCTTTCGCCTTATAAACAACCGCAAC
IN_095R	K. lactis Ndt80 KO 3' Homology R	CCTAGCGCATTCTTTGCGCCAT
IN_096F	K. lactis Ndt80 KO Ura F	CCGCTGCTAGGCGCGCCGTGGAATTCTCATGTTTGACAGCTTATC
IN_097R	K. lactis Ndt80 KO Ura R	GCAGGGATGCGGCCGCTGACACAGTTTTTTAGTTTTGCTGGCCGC
IN_259F	K. lactis Ndt80 KO KanMX F	ccgctgctaggcgcgccgtgAGATCTGTTTAGCTTGCCTCGTCCCCGC
IN_260R	K. lactis Ndt80 KO KanMX R	gcagggatgcggccgctgacGAATTCGAGCTCGTTTAAAC
IN_261F	P. pastoris Ndt80 KO 5' Homology F	tccgtcttcgttggtgttgt
IN_262R	P. pastoris Ndt80 KO 5' Homology R	CACGGCGCGCCTAGCAGCGGtccaactggctacctttatttggt
IN_348F	P. pastoris Ndt80 KO 3' Homology F	GTCAGCGGCCGCATCCCTGCgaaaacatagaattgtaatcgttattagacctcata
IN_349R	P. pastoris Ndt80 KO 3' Homology R	caggagccttttcatccacaac
IN_126F	P. pastoris Ndt80 KO Hyg Split1 F	ccgctgctaggcgcgccgtgAGATCTGTTTAGCTTGCCTCGT
IN_254R	P. pastoris Ndt80 KO Hyg Split1 R	agtcaggactagactgacagACATCACACATACAACCACACACA
IN_255F	P. pastoris Ndt80 KO Hyg Split 2 F	GAATCGGTCAATACACTACATGGCG
IN_127R	P. pastoris Ndt80 KO Hyg Split 2 R	gcagggatgcggccgctgacTCGAGCTCGTTAAAGCCTTCG
IN_106F	C. lusitaniae Ndt80A KO 5' Homology F	TGAAAACACCTCGATAACCAACTTTG
IN_107R	C. lusitaniae Ndt80A KO 5' Homology R	cacggcgcgcctagcagcggGCTCCAATTTAGCCGCTTGG
IN_110F	C. lusitaniae Ndt80A KO 3' Homology F	gtcagcggccgcatccctgcGTCTACACTCGAAGGTTGTTTATGC
IN_111R	C. lusitaniae Ndt80A KO 3' Homology R	GCTCCAGAAAAGACAGAAGAAGAAATT
IN_112F	C. lusitaniae Ndt80B KO 5' Homology F	GCAGAGAAGCAGTTCGGTTACC
IN_113R	C. lusitaniae Ndt80B KO 5' Homology R	cacggcgcgcctagcagcggGAGAAATCAACAGAATTGAGTTGCTGA
IN_114F	C. lusitaniae Ndt80B KO 3' Homology F	gtcagcggccgcatccctgcTCTCCAAGTCATATACCAAATGATTTCGA
IN_115R	C. lusitaniae Ndt80B KO 3' Homology R	TGTTATTGGAGTCTTCGAATGGACT
IN_364F	C. lusitaniae Ndt80A/B KO NAT Split1 F	cattcaaaatggacggtggtatgttttagtttagcttcaattct
IN_368R	C. lusitaniae Ndt80A/B KO NAT Split1 R	ggattactcaccgaatggttttgaaaccactgc
IN_371F	C. lusitaniae Ndt80A/B KO NAT Split 2 F	CCGCTGCTAGGCGCGCCGTGggtattttctcttgtttgatgattcatcccattcattccatc
IN_363R	C. lusitaniae Ndt80A/B KO NAT Split 2 R	GCAGGGATGCGGCCGCTGACggcggccgctctagaactagtggatc
IN_494F	P. pastoris Ndt80 Tag 5' Homology F	gatgaaactgaacccaaaggttgc
IN_495R	P. pastoris Ndt80 Tag 5' Homology R	cttgattcggtgatgagttgaaaacg
IN_496F	P. pastoris Ndt80 Tag 3' Homology F	agaatcttatcagaagattaagatttctggttcg
IN_497R	P. pastoris Ndt80 Tag 3' Homology R	ctggagtgccttcgtcaataact
IN_488F	P. pastoris Ndt80 Tag 13xMyc Split1 F	tttcaactcatcaccgaatcaagatcaaagccactcatctatctttgaaaatgaactgtacaactttcggatccccgggttaattaacgg
IN_508R	P. pastoris Ndt80 Tag 13xMyc Split1 R	ggattactcaccgaatggttttgaaa
IN_510F	P. pastoris Ndt80 Tag 13xMyc Split2 F	agcttcaattctaattgattgattaatcagttg
IN_489R	P. pastoris Ndt80 Tag 13xMyc Split2 R	cagaaatcttaatcttctgataagattctatgaggtctaataacgattacaattctatgttttcGGCGGCCGCTCTAGAACTAGTGGATC
IN_560F	P. pastoris Ndt80 Promoter Replacement 5' Homology F	agatccttcaactcttgcgctt
IN_561R	P. pastoris Ndt80 Promoter Replacement 5' Homology R	CACGGCGCGCCTAGCAGCGGatgggaaagaaagctatagattctagaatcc
IN_633F	P. pastoris Ndt80 Promoter Replacement 3' Homology F	atgcttatttctcttcctgcacaac
IN_284R	P. pastoris Ndt80 Promoter Replacement 3' Homology R	gcaaacttgaccttggagcaac
IN_514F	P. pastoris Ndt80 Promoter Replacement pTef1 F	ccgctgctaggcgcgccgtgatcaagcttgcctcgtcccc
IN_632R	P. pastoris Ndt80 Promoter Replacement pTef1 R	gcaggaagagaaataagcatccaacgcgttggg
IN_704F	S. cerevisiae Ndt80 Tag 13xMyc F	GTATATTTAATAGGGAAGAATTGTTTGAGGAAGATAGTTTCTATAAGTATcggatccccgggttaattaa
IN_705R	S. cerevisiae Ndt80 Tag 13xMyc R	GATCCACAGAATTCGCATATTTTTTTAACGATTTAAAATCATTAGTTTATGAATTCGAGCTCGTTTAAAC
IN_735F	S. cerevisiae Ndt80 Promoter Replacement pGal1 F	tcaggcactagtTTATATTGAATTTTCAAAAATTCTTACTTTTTTTTTGGATGG
IN_736R	S. cerevisiae Ndt80 Promoter Replacement pGal1 R	tagacagagctcTATAGTTTTTTCTCCTTGACGTTAAAGTATAGAGG
IN_725F	K. lactis Ndt80 Tag 5' Homology F	ACATCCGAACATAAACAAAAATGATGGAGGATTTGGACCATCT
IN_726R	K. lactis Ndt80 Tag 5' Homology R	attcgaCCCGGGGATCCGatgacggaagatgctcggcCCA
IN_727F	K. lactis Ndt80 Tag 3' Homology F	cgatcagtttaaacTAGCTTTCGCCTTATAAACAACCGC
IN_728R	K. lactis Ndt80 Tag 3' Homology R	taacgagagctcGCATTCTTTGCGCCATTGGA
IN_729F	K. lactis Ndt80 Promoter Replacement 5' Homology F	acctgagcatgcATGAAGGTCAAGATTGCATGAGC
IN_730R	K. lactis Ndt80 Promoter Replacement 5' Homology R	ttgcaggcatgcATGGGTAAAAAAGCTATTGATTCTCGTATC
IN_731F	K. lactis Ndt80 Promoter Replacement 3' Homology F	tccagtgagctcATGATGGAGGATTTGGACCATCT
IN_732R	K. lactis Ndt80 Promoter Replacement 3' Homology R	actatgggcgccTGTCTTCCCTTCACATAGCAGC
IN_748F	K. lactis Ndt80 Promoter Replacement pTef1 F	GTACCAactagtTTTGGCTTCGAGGAGTTTCCT
IN_749R	K. lactis Ndt80 Promoter Replacement pTef1 R	tcagtcGAGCTCTATTATTTCTTATATTTCAGCCTTGTTTCAAACCT
IN_739F	P. pastoris Ndt80 in S. cerevisiae PpNdt80 F	atgaaaagagaaccgcaacggg
IN_740R	P. pastoris Ndt80 in S. cerevisiae PpNdt80 R	attcttgtcgactagtagacatagtcgc
IN_743F	P. pastoris Ndt80 in S. cerevisiae pGal1 F	TTTACTTATAATACAGTTTTATATTGAATTTTCAAAAATTCTTACTTTTTTTTTGGATGG
IN_738R	P. pastoris Ndt80 in S. cerevisiae pGal1 R	cgttgcggttctcttttcatTATAGTTTTTTCTCCTTGACGTTAAAGTATAGAGG
IN_715F	P. pastoris Ndt80 in S. cerevisiae 13xMyc F	CGGATCCCCGGGTTAATTAACG
IN_716R	P. pastoris Ndt80 in S. cerevisiae13xMyc R	GCAAGTctcgagATATTACCCTGTTATCCCTAGCGGA
IN_616F	S. stipitis Ndt80A Tag Ndt80A F	gatgacCCTGCAGGATGGGTGCAAATTTGGTCTGTATG
IN_617R	S. stipitis Ndt80A Tag Ndt80A R	ttaattaacccggggatccgGAATCGAAAGTTTCTATTCGTATCTATCAATGC
IN_618F	S. stipitis Ndt80B Tag Ndt80B F	gatgacCCTGCAGGATGATGACCATGTCTTCCGACG
IN_619R	S. stipitis Ndt80B Tag Ndt80B R	ttaattaacccggggatccgATGGCCCTGGAGATGGCC
IN_612F	S. stipitis Ndt80A/B Tag Myc F	cggatccccgggttaattaacg
IN_613R	S. stipitis Ndt80A/B Tag Myc R	tcccccttcacacttcacatctcgagcgcgaattcactagtg
IN_614F	S. stipitis Ndt80A/B Tag tSat1 F	atgtgaagtgtgaagggggaga
IN_615R	S. stipitis Ndt80A/B Tag tSat1 R	tggaccGGTACCgcaggaccacctttgattgtaaat
IN_412F	C. albicans Ndt80A Promoter Replacement F	ATGAAAAAAGATCTTTGCTTTTCTTGAACGCCATTACGTATCAAGGCAGGAATACGTGCATCAATTGCTTTTTTACCCATatcaagcttgcctcgtcccc
IN_413R	C. albicans Ndt80A Promoter Replacement R	CAGACTTGAAATCAAGGTTACAAGCTTTATTCTTTGATTTTTGTTTCCTATGGAAGGAGAGGTTAGTCATatttgaattcaattgtgatg
IN_414F	C. albicans Ndt80B Promoter Replacement F	TCTTACAGTAGTGCACACTTGCTCAAAAAAACCGAATTTTCAATCCCATCACATCAAACGGAACGACTGAatcaagcttgcctcgtcccc
IN_415R	C. albicans Ndt80B Promoter Replacement R	AGTGCGACATCTGCTGGTATGGCTGGTGGTTCAAATGTTGGTTGTTGTTGACACCAGCTGATGGATGCATatttgaattcaattgtgatg
